# Supplementary material for: Correction: The UK Coronavirus Job Retention Scheme and diet, physical activity, and sleep during the COVID-19 pandemic: evidence from eight longitudinal population surveys
Source: Springer Nature journal article supplement (doi:10.1186/s12916-022-02502-1), 2022-07-30
Supplement: MOESM2 [file 23320858]

## Additional File 3: Meta-analysis results

### Summary Tables

|                                                                                              |    |
|----------------------------------------------------------------------------------------------|----|
| Table 1. Main analysis excluding studies with $\leq 5$ cell counts for exposure-outcome..... | 2  |
| Table 2. Main analysis excluding studies with $\leq 2$ cell counts for exposure-outcome..... | 3  |
| Table 3. Main analysis excluding studies with zero cell counts for exposure-outcome .....    | 4  |
| Table 4. Analysis of change excluding studies with $\leq 5$ cell counts.....                 | 5  |
| Table 5. Analysis of change excluding studies with $\leq 2$ cell counts.....                 | 8  |
| Table 6. Analysis of change excluding studies with zero cell counts.....                     | 11 |

### Forest Plots (*Unadjusted, Basic, and Fully adjusted*)

|                                                                         |    |
|-------------------------------------------------------------------------|----|
| Figure set 1: Currently eats 2 or fewer fruit & veg .....               | 14 |
| Figure set 2: Fewer fruit and vegetables .....                          | 19 |
| Figure set 3: More fruit and vegetables.....                            | 24 |
| Figure set 4: Less than 3 days a week of at least 30 min exercise ..... | 29 |
| Figure set 5: Less time/fewer days of physical exercise .....           | 34 |
| Figure set 6: More time/days of physical exercise.....                  | 40 |
| Figure set 7: Sleeps outside 'Normal Range' (i.e. <6 or 9+ hours) ..... | 46 |
| Figure set 8: Sleeps less than before .....                             | 51 |
| Figure set 9: Sleeps more than before .....                             | 57 |
| Figure set 10: From 6/9 hours a night to outside 'normal range' .....   | 63 |
| Figure set 11: From outside 'normal range' to 6/9h a night .....        | 68 |

Notes: Basic adjustment includes socio-demographic characteristics: age (only in age-heterogeneous studies), sex, ethnicity (except the BCS70 and NCDS cohorts which were nearly all white), education, UK nation (except ALSPAC, GS and ELSA which only had participants from a single country), and household composition. Full adjustment additionally includes pre-pandemic measures of psychological distress, self-rated health, and health behaviours.

**Table 1. Main analysis excluding studies with  $\leq 5$  cell counts for exposure-outcome**

|                    |           | Currently eats 2 or fewer fruit & veg |          |          |       | Less than 3 days a week of at least 30min exercise |          |          |       | Sleeps outside 'Normal Range' (i.e. <6 or 9+ hours) |          |          |       |
|--------------------|-----------|---------------------------------------|----------|----------|-------|----------------------------------------------------|----------|----------|-------|-----------------------------------------------------|----------|----------|-------|
|                    |           | RR                                    | Lower CI | Upper CI | I2%   | RR                                                 | Lower CI | Upper CI | I2%   | RR                                                  | Lower CI | Upper CI | I2%   |
| Furloughed         | Overall   | 0.97                                  | 0.87     | 1.09     | 41.83 | 0.85                                               | 0.75     | 0.97     | 58.73 | 1.28                                                | 0.92     | 1.78     | 84.34 |
|                    | female    | 0.84                                  | 0.68     | 1.04     | 65.28 | 0.87                                               | 0.79     | 0.95     | 0     | 1.30                                                | 0.89     | 1.88     | 83.76 |
|                    | male      | 1.11                                  | 1.01     | 1.22     | 0     | 0.88                                               | 0.75     | 1.03     | 41.13 | 1.14                                                | 0.88     | 1.47     | 24.55 |
|                    | Degree    | 0.96                                  | 0.71     | 1.30     | 76.09 | 0.81                                               | 0.72     | 0.91     | 0.00  | 1.28                                                | 0.81     | 2.01     | 73.72 |
|                    | No degree | 1.00                                  | 0.91     | 1.09     | 0.00  | 0.88                                               | 0.75     | 1.03     | 60.15 | 1.20                                                | 0.94     | 1.54     | 61.57 |
|                    | 16-29y    | 0.84                                  | 0.57     | 1.25     | 66.75 | 0.76                                               | 0.56     | 1.03     | 0.00  | 1.39                                                | 0.31     | 6.16     | 90.51 |
|                    | 30-49y    | 0.89                                  | 0.77     | 1.04     | 0.00  | 0.83                                               | 0.59     | 1.17     | 65.57 | 1.10                                                | 0.78     | 1.54     | 36.92 |
|                    | 50+y      | 1.06                                  | 0.96     | 1.17     | 0.00  | 0.86                                               | 0.72     | 1.03     | 68.17 | 1.10                                                | 0.88     | 1.39     | 46.33 |
| No longer employed | Overall   | 0.95                                  | 0.81     | 1.12     | 0     | 1.02                                               | 0.85     | 1.24     | 40.11 | 1.38                                                | 0.81     | 2.36     | 82.29 |
|                    | female    | 0.81                                  | 0.55     | 1.18     | 49.84 | 1.11                                               | 0.94     | 1.31     | 1.06  | 1.34                                                | 0.83     | 2.16     | 68.97 |
|                    | male      | 1.14                                  | 0.93     | 1.39     | 0     | 0.98                                               | 0.80     | 1.21     | 0     | 1.28                                                | 0.31     | 5.20     | 85.62 |
|                    | Degree    | 0.92                                  | 0.62     | 1.36     | 0.00  | 1.08                                               | 0.80     | 1.47     | 53.38 | 1.58                                                | 0.41     | 6.00     | 74.04 |
|                    | No degree | 1.08                                  | 0.89     | 1.30     | 0.00  | 0.96                                               | 0.80     | 1.15     | 0.00  | 1.46                                                | 0.86     | 2.49     | 71.78 |
|                    | 16-29y    | 0.92                                  | 0.59     | 1.43     | 45.37 | 0.98                                               | 0.46     | 2.09     | 73.41 | 3.80                                                | 2.35     | 6.15     |       |
|                    | 30-49y    | 0.77                                  | 0.41     | 1.44     | 59.88 | 1.28                                               | 0.96     | 1.71     | 0.00  | 1.36                                                | 0.58     | 3.20     | 57.29 |
|                    | 50+y      | 0.99                                  | 0.78     | 1.25     | 0.00  | 1.02                                               | 0.86     | 1.20     | 0.03  | 1.09                                                | 0.70     | 1.68     | 56.48 |
| Stable unemployed  | Overall   | 1.00                                  | 0.83     | 1.20     | 0     | 1.21                                               | 0.91     | 1.61     | 74.71 | 1.76                                                | 0.85     | 3.64     | 85.29 |
|                    | female    | 0.94                                  | 0.72     | 1.23     | 0     | 1.20                                               | 0.90     | 1.59     | 42.82 | 2.34                                                | 1.43     | 3.81     | 51.22 |
|                    | male      | 1.07                                  | 0.84     | 1.36     | 0     | 1.17                                               | 0.74     | 1.84     | 76.87 | 1.66                                                | 0.85     | 3.23     | 63.24 |
|                    | Degree    | 1.04                                  | 0.63     | 1.73     | *     | 0.83                                               | 0.69     | 0.99     | *     | no information                                      |          |          |       |
|                    | No degree | 1.03                                  | 0.84     | 1.26     | 0.00  | 1.33                                               | 0.96     | 1.82     | 72.69 | 2.19                                                | 1.48     | 3.25     | 28.66 |
|                    | 16-29y    | 1.27                                  | 0.63     | 2.56     | 87.75 | 1.50                                               | 0.41     | 5.39     | 91.84 | 2.92                                                | 1.69     | 5.05     | *     |
|                    | 30-49y    | 0.83                                  | 0.36     | 1.93     | 69.28 | 1.41                                               | 1.15     | 1.72     | 0.00  | 2.09                                                | 0.89     | 4.89     | 70.99 |
|                    | 50+y      | 0.71                                  | 0.38     | 1.33     | 64.94 | 1.17                                               | 0.90     | 1.53     | 26.48 | 0.96                                                | 0.39     | 2.39     | 78.41 |

\* indicates only one study included

**Table 2. Main analysis excluding studies with  $\leq 2$  cell counts for exposure-outcome**

|                    |           | Currently eats 2 or fewer fruit & veg |          |          |       | Less than 3 days a week of at least 30min exercise |          |          |       | Sleeps outside 'Normal Range' (i.e. <6 or 9+ hours) |          |          |       |
|--------------------|-----------|---------------------------------------|----------|----------|-------|----------------------------------------------------|----------|----------|-------|-----------------------------------------------------|----------|----------|-------|
|                    |           | RR                                    | Lower CI | Upper CI | I2%   | RR                                                 | Lower CI | Upper CI | I2%   | RR                                                  | Lower CI | Upper CI | I2%   |
| Furloughed         | Overall   | 0.97                                  | 0.87     | 1.09     | 41.83 | 0.85                                               | 0.75     | 0.97     | 58.73 | 1.28                                                | 0.92     | 1.78     | 84.34 |
|                    | female    | 0.84                                  | 0.68     | 1.04     | 65.28 | 0.87                                               | 0.79     | 0.95     | 0     | 1.30                                                | 0.89     | 1.88     | 83.76 |
|                    | male      | 1.11                                  | 1.01     | 1.22     | 0     | 0.88                                               | 0.75     | 1.03     | 41.13 | 1.14                                                | 0.88     | 1.47     | 24.55 |
|                    | Degree    | 0.96                                  | 0.71     | 1.30     | 76.09 | 0.81                                               | 0.72     | 0.91     | 0.00  | 1.18                                                | 0.80     | 1.74     | 65.59 |
|                    | No degree | 1.00                                  | 0.91     | 1.09     | 0.00  | 0.88                                               | 0.75     | 1.03     | 60.15 | 1.20                                                | 0.94     | 1.54     | 61.57 |
|                    | 16-29y    | 0.84                                  | 0.57     | 1.25     | 66.75 | 0.76                                               | 0.56     | 1.03     | 0.00  | 1.39                                                | 0.31     | 6.16     | 90.51 |
|                    | 30-49y    | 0.89                                  | 0.77     | 1.04     | 0.00  | 0.83                                               | 0.59     | 1.17     | 65.57 | 1.10                                                | 0.78     | 1.54     | 36.92 |
|                    | 50+y      | 1.06                                  | 0.96     | 1.17     | 0.00  | 0.86                                               | 0.72     | 1.03     | 68.17 | 1.10                                                | 0.88     | 1.39     | 46.33 |
| No longer employed | Overall   | 0.95                                  | 0.81     | 1.12     | 0     | 1.02                                               | 0.85     | 1.24     | 40.11 | 1.38                                                | 0.81     | 2.36     | 82.29 |
|                    | female    | 0.81                                  | 0.55     | 1.18     | 49.84 | 1.11                                               | 0.94     | 1.31     | 1.06  | 1.34                                                | 0.83     | 2.16     | 68.97 |
|                    | male      | 1.14                                  | 0.93     | 1.39     | 0     | 0.98                                               | 0.80     | 1.21     | 0     | 1.23                                                | 0.52     | 2.92     | 74.05 |
|                    | Degree    | 0.79                                  | 0.46     | 1.36     | 69.70 | 1.08                                               | 0.80     | 1.47     | 53.38 | 1.11                                                | 0.72     | 1.71     | 12.58 |
|                    | No degree | 1.00                                  | 0.84     | 1.19     | 0.00  | 0.96                                               | 0.80     | 1.15     | 0.00  | 1.46                                                | 0.86     | 2.49     | 71.78 |
|                    | 16-29y    | 0.92                                  | 0.59     | 1.43     | 45.37 | 0.98                                               | 0.46     | 2.09     | 73.41 | 3.80                                                | 2.35     | 6.15     | *     |
|                    | 30-49y    | 0.77                                  | 0.41     | 1.44     | 59.88 | 1.28                                               | 0.96     | 1.71     | 0.00  | 1.16                                                | 0.60     | 2.26     | 45.34 |
|                    | 50+y      | 0.99                                  | 0.78     | 1.25     | 0.00  | 1.02                                               | 0.86     | 1.20     | 0.03  | 1.09                                                | 0.70     | 1.68     | 56.48 |
| Stable unemployed  | Overall   | 1.00                                  | 0.83     | 1.20     | 0     | 1.15                                               | 0.90     | 1.47     | 62.25 | 1.44                                                | 0.69     | 2.99     | 85.86 |
|                    | female    | 0.90                                  | 0.70     | 1.17     | 0     | 1.09                                               | 0.78     | 1.52     | 56.95 | 1.31                                                | 0.54     | 3.17     | 85.51 |
|                    | male      | 1.28                                  | 0.87     | 1.88     | 63.67 | 1.15                                               | 0.89     | 1.47     | 50.01 | 2.09                                                | 1.04     | 4.20     | 71.15 |
|                    | Degree    | 1.01                                  | 0.50     | 2.06     | 82.44 | 1.02                                               | 0.70     | 1.50     | 66.83 | 1.97                                                | 1.17     | 3.31     | 35.72 |
|                    | No degree | 1.02                                  | 0.83     | 1.24     | 0.00  | 1.32                                               | 1.03     | 1.68     | 58.58 | 1.65                                                | 0.75     | 3.65     | 82.22 |
|                    | 16-29y    | 1.27                                  | 0.63     | 2.56     | 87.75 | 1.50                                               | 0.41     | 5.39     | 91.84 | 2.75                                                | 1.63     | 4.63     | 0.00  |
|                    | 30-49y    | 0.83                                  | 0.36     | 1.93     | 69.28 | 1.41                                               | 1.15     | 1.72     | 0.00  | 2.09                                                | 0.89     | 4.89     | 70.99 |
|                    | 50+y      | 0.71                                  | 0.38     | 1.33     | 64.94 | 1.12                                               | 0.93     | 1.34     | 0.00  | 0.98                                                | 0.53     | 1.80     | 60.57 |

\* indicates only one study included

**Table 3. Main analysis excluding studies with zero cell counts for exposure-outcome**

|                    |           | Currently eats 2 or fewer fruit & veg |          |          |       | Less than 3 days a week of at least 30min exercise |          |          |       | Sleeps outside 'Normal Range' (i.e. <6 or 9+ hours) |          |          |       |
|--------------------|-----------|---------------------------------------|----------|----------|-------|----------------------------------------------------|----------|----------|-------|-----------------------------------------------------|----------|----------|-------|
|                    |           | RR                                    | Lower CI | Upper CI | I2%   | RR                                                 | Lower CI | Upper CI | I2%   | RR                                                  | Lower CI | Upper CI | I2%   |
| Furloughed         | Overall   | 0.97                                  | 0.87     | 1.09     | 41.83 | 0.85                                               | 0.75     | 0.97     | 58.73 | 1.28                                                | 0.92     | 1.78     | 84.34 |
|                    | female    | 0.84                                  | 0.68     | 1.04     | 65.28 | 0.87                                               | 0.79     | 0.95     | 0     | 1.30                                                | 0.89     | 1.88     | 83.76 |
|                    | male      | 1.11                                  | 1.01     | 1.22     | 0     | 0.88                                               | 0.75     | 1.03     | 41.13 | 1.14                                                | 0.88     | 1.47     | 24.55 |
|                    | Degree    | 0.96                                  | 0.71     | 1.30     | 76.09 | 0.81                                               | 0.72     | 0.91     | 0.00  | 1.18                                                | 0.80     | 1.74     | 65.59 |
|                    | No degree | 1.00                                  | 0.91     | 1.09     | 0.00  | 0.88                                               | 0.75     | 1.03     | 60.15 | 1.20                                                | 0.94     | 1.54     | 61.57 |
|                    | 16-29y    | 0.84                                  | 0.57     | 1.25     | 66.75 | 0.76                                               | 0.56     | 1.03     | 0.00  | 1.39                                                | 0.31     | 6.16     | 90.51 |
|                    | 30-49y    | 0.89                                  | 0.77     | 1.04     | 0.00  | 0.83                                               | 0.59     | 1.17     | 65.57 | 1.10                                                | 0.78     | 1.54     | 36.92 |
|                    | 50+y      | 1.06                                  | 0.96     | 1.17     | 0.00  | 0.86                                               | 0.72     | 1.03     | 68.17 | 1.10                                                | 0.88     | 1.39     | 46.33 |
| No longer employed | Overall   | 0.95                                  | 0.81     | 1.12     | 0     | 1.02                                               | 0.85     | 1.24     | 40.11 | 1.38                                                | 0.81     | 2.36     | 82.29 |
|                    | female    | 0.80                                  | 0.56     | 1.13     | 40.08 | 1.11                                               | 0.94     | 1.31     | 1.06  | 1.34                                                | 0.83     | 2.16     | 68.97 |
|                    | male      | 1.14                                  | 0.93     | 1.39     | 0     | 0.98                                               | 0.80     | 1.21     | 0     | 1.23                                                | 0.52     | 2.92     | 74.05 |
|                    | Degree    | 0.79                                  | 0.46     | 1.36     | 69.70 | 1.08                                               | 0.80     | 1.47     | 53.38 | 1.11                                                | 0.72     | 1.71     | 12.58 |
|                    | No degree | 1.00                                  | 0.84     | 1.19     | 0.00  | 0.96                                               | 0.80     | 1.15     | 0.00  | 1.46                                                | 0.86     | 2.49     | 71.78 |
|                    | 16-29y    | 0.92                                  | 0.59     | 1.43     | 45.37 | 0.98                                               | 0.46     | 2.09     | 73.41 | 3.80                                                | 2.35     | 6.15     | *     |
|                    | 30-49y    | 0.77                                  | 0.41     | 1.44     | 59.88 | 1.28                                               | 0.96     | 1.71     | 0.00  | 1.16                                                | 0.60     | 2.26     | 45.34 |
|                    | 50+y      | 0.99                                  | 0.78     | 1.25     | 0.00  | 1.02                                               | 0.86     | 1.20     | 0.03  | 1.09                                                | 0.70     | 1.68     | 56.48 |
| Stable unemployed  | Overall   | 1.00                                  | 0.83     | 1.20     | 0     | 1.15                                               | 0.90     | 1.47     | 62.25 | 1.48                                                | 0.80     | 2.75     | 80.5  |
|                    | female    | 0.90                                  | 0.70     | 1.17     | 0     | 1.09                                               | 0.78     | 1.52     | 56.95 | 1.29                                                | 0.58     | 2.85     | 80.81 |
|                    | male      | 1.22                                  | 0.83     | 1.77     | 57.81 | 1.20                                               | 0.95     | 1.53     | 51.36 | 1.96                                                | 1.14     | 3.39     | 58.6  |
|                    | Degree    | 1.01                                  | 0.50     | 2.06     | 82.44 | 0.98                                               | 0.68     | 1.40     | 55.89 | 1.75                                                | 1.22     | 2.50     | 0.00  |
|                    | No degree | 1.02                                  | 0.83     | 1.24     | 0.00  | 1.32                                               | 1.03     | 1.68     | 58.58 | 1.37                                                | 0.70     | 2.70     | 76.04 |
|                    | 16-29y    | 1.27                                  | 0.63     | 2.56     | 87.75 | 1.50                                               | 0.41     | 5.39     | 91.84 | 2.75                                                | 1.63     | 4.63     | 0.00  |
|                    | 30-49y    | 0.83                                  | 0.36     | 1.93     | 69.28 | 1.39                                               | 1.14     | 1.70     | 0.00  | 2.09                                                | 0.89     | 4.89     | 70.99 |
|                    | 50+y      | 0.71                                  | 0.38     | 1.33     | 64.94 | 1.12                                               | 0.93     | 1.34     | 0.00  | 0.98                                                | 0.53     | 1.80     | 60.57 |

\* indicates only one study included

**Table 4. Analysis of change excluding studies with  $\leq 5$  cell counts**

|                    |           | Fewer fruit and veg |          |          |       | More fruit and veg |          |          |       |
|--------------------|-----------|---------------------|----------|----------|-------|--------------------|----------|----------|-------|
|                    |           | RR                  | Lower CI | Upper CI | I2%   | RR                 | Lower CI | Upper CI | I2%   |
| Furloughed         | Overall   | 0.96                | 0.87     | 1.08     | 8.96  | 1.22               | 1.04     | 1.43     | 52.46 |
|                    | female    | 0.91                | 0.81     | 1.02     | 0     | 1.16               | 1.03     | 1.31     | 5.34  |
|                    | male      | 1.03                | 0.90     | 1.19     | 1.11  | 1.21               | 0.98     | 1.50     | 40.11 |
|                    | Degree    | 0.95                | 0.70     | 1.29     | 63.37 | 1.17               | 1.04     | 1.33     | 0     |
|                    | No degree | 0.97                | 0.87     | 1.09     | 0     | 1.26               | 0.99     | 1.61     | 62.7  |
|                    | 16-29y    | 0.75                | 0.38     | 1.47     | 75.61 | 1.18               | 0.91     | 1.52     | 0     |
|                    | 30-49y    | 0.88                | 0.76     | 1.03     | 0     | 1.16               | 0.90     | 1.50     | 42.19 |
|                    | 50+y      | 1.05                | 0.93     | 1.18     | 0     | 1.16               | 0.90     | 1.51     | 78.74 |
| No longer employed | Overall   | 0.86                | 0.54     | 1.35     | 55.22 | 1.02               | 0.83     | 1.25     | 0     |
|                    | female    | 0.88                | 0.68     | 1.14     | 0     | 1.23               | 1.00     | 1.51     | 0     |
|                    | male      | 1.21                | 0.94     | 1.55     |       | 0.90               | 0.47     | 1.71     | 60.88 |
|                    | Degree    | 0.72                | 0.30     | 1.75     | 66.85 | 1.17               | 0.91     | 1.51     | 0     |
|                    | No degree | 1.11                | 0.87     | 1.41     | 0     | 1.07               | 0.68     | 1.68     | 48.26 |
|                    | 16-29y    | 0.82                | 0.50     | 1.36     | 18.7  | 1.12               | 0.76     | 1.66     | 0     |
|                    | 30-49y    | 0.80                | 0.28     | 2.25     | 80.55 | 0.94               | 0.38     | 2.34     | 73.5  |
|                    | 50+y      | 1.00                | 0.79     | 1.27     | 0     | 1.00               | 0.80     | 1.24     | 0     |
| Stable unemployed  | Overall   | 0.86                | 0.34     | 2.20     | 86.92 | 0.98               | 0.56     | 1.70     | 56.16 |
|                    | female    | 0.92                | 0.65     | 1.31     | 0     | 0.95               | 0.50     | 1.80     | 45.59 |
|                    | male      | 0.81                | 0.42     | 1.55     |       | 1.22               | 0.63     | 2.38     | 49.82 |
|                    | Degree    | 0.87                | 0.45     | 1.71     |       | 1.15               | 0.65     | 2.04     |       |
|                    | No degree | 0.93                | 0.33     | 2.59     | 86.33 | 0.68               | 0.17     | 2.82     | 84.44 |
|                    | 16-29y    | 0.63                | 0.18     | 2.19     | 77.06 | 0.47               | 0.20     | 1.09     |       |
|                    | 30-49y    | 0.47                | 0.23     | 0.96     |       | 1.88               | 1.32     | 2.70     |       |
|                    | 50+y      | 1.22                | 0.54     | 2.74     | 80.15 | 1.17               | 0.84     | 1.63     | 0     |

|                    |           | Less time/Fewer days of physical exercise |          |          |       | More time/days of physical exercise |          |          |       |
|--------------------|-----------|-------------------------------------------|----------|----------|-------|-------------------------------------|----------|----------|-------|
|                    |           | RR                                        | Lower CI | Upper CI | I2%   | RR                                  | Lower CI | Upper CI | I2%   |
| Furloughed         | Overall   | 1.07                                      | 0.97     | 1.17     | 38.53 | 1.19                                | 1.04     | 1.36     | 75.78 |
|                    | female    | 1.01                                      | 0.90     | 1.12     | 31.88 | 1.20                                | 1.08     | 1.34     | 46.48 |
|                    | male      | 1.16                                      | 1.04     | 1.29     | 4.72  | 1.18                                | 0.98     | 1.43     | 65.02 |
|                    | Degree    | 1.02                                      | 0.92     | 1.13     | 0     | 1.11                                | 1.02     | 1.22     | 5.98  |
|                    | No degree | 1.10                                      | 0.99     | 1.21     | 30.03 | 1.22                                | 1.05     | 1.42     | 70.82 |
|                    | 16-29y    | 1.06                                      | 0.87     | 1.28     | 0     | 1.19                                | 0.74     | 1.91     | 69.22 |
|                    | 30-49y    | 1.11                                      | 0.89     | 1.38     | 59.5  | 1.03                                | 0.91     | 1.16     | 0     |
|                    | 50+y      | 1.04                                      | 0.86     | 1.26     | 73.46 | 1.11                                | 0.84     | 1.46     | 91.24 |
| No longer employed | Overall   | 1.07                                      | 0.93     | 1.23     | 21    | 1.12                                | 1.00     | 1.26     | 0.17  |
|                    | female    | 1.14                                      | 0.91     | 1.43     | 57.54 | 1.00                                | 0.85     | 1.16     | 16.71 |
|                    | male      | 1.03                                      | 0.77     | 1.39     | 45.18 | 1.33                                | 1.12     | 1.59     | 0     |
|                    | Degree    | 0.93                                      | 0.77     | 1.12     | 0     | 1.06                                | 0.92     | 1.24     | 0     |
|                    | No degree | 1.31                                      | 1.08     | 1.58     | 43.69 | 1.15                                | 1.00     | 1.33     | 0     |
|                    | 16-29y    | 0.86                                      | 0.54     | 1.36     | 49.18 | 1.27                                | 0.80     | 2.00     | 31.73 |
|                    | 30-49y    | 1.12                                      | 0.77     | 1.64     | 18.69 | 1.12                                | 0.79     | 1.59     | 35.14 |
|                    | 50+y      | 1.10                                      | 0.90     | 1.35     | 39.83 | 1.05                                | 0.91     | 1.21     | 0     |
| Stable unemployed  | Overall   | 0.84                                      | 0.65     | 1.09     | 27.66 | 1.14                                | 0.96     | 1.35     | 0     |
|                    | female    | 0.86                                      | 0.65     | 1.12     | 10.6  | 1.14                                | 0.92     | 1.40     | 0     |
|                    | male      | 0.83                                      | 0.57     | 1.21     | 0     | 1.35                                | 1.00     | 1.83     | 0     |
|                    | Degree    | 0.63                                      | 0.35     | 1.12     | 33.8  | 1.12                                | 0.89     | 1.42     | 0     |
|                    | No degree | 0.89                                      | 0.62     | 1.27     | 57.27 | 1.24                                | 1.02     | 1.52     | 0     |
|                    | 16-29y    | 0.60                                      | 0.30     | 1.19     | 0     | 1.30                                | 0.72     | 2.37     | 31.48 |
|                    | 30-49y    | 1.27                                      | 0.87     | 1.86     | *     | 0.60                                | 0.34     | 1.08     | 4.48  |
|                    | 50+y      | 0.97                                      | 0.62     | 1.52     | 72.02 | 1.07                                | 0.89     | 1.29     | 0     |

|                   |                    | Sleep less than before |          |          |       | Sleep more than before |          |          |       | From 6/9h a night to outside 'normal range' |          |          |       | From outside 'normal range' to 6/9h a night |          |          |       |
|-------------------|--------------------|------------------------|----------|----------|-------|------------------------|----------|----------|-------|---------------------------------------------|----------|----------|-------|---------------------------------------------|----------|----------|-------|
|                   |                    | RR                     | Lower CI | Upper CI | I2%   | RR                     | Lower CI | Upper CI | I2%   | RR                                          | Lower CI | Upper CI | I2%   | RR                                          | Lower CI | Upper CI | I2%   |
| Furloughed        | Overall            | 0.90                   | 0.75     | 1.07     | 70.74 | 1.63                   | 1.39     | 1.91     | 80.2  | 1.46                                        | 1.04     | 2.07     | 75.13 | 1.78                                        | 1.03     | 3.07     | 75.7  |
|                   | female             | 0.91                   | 0.80     | 1.02     | 19.62 | 1.54                   | 1.32     | 1.80     | 68.21 | 1.36                                        | 0.89     | 2.09     | 77.96 | 1.63                                        | 1.07     | 2.50     | 43.73 |
|                   | male               | 0.90                   | 0.66     | 1.22     | 69.53 | 1.71                   | 1.41     | 2.06     | 65.36 | 1.41                                        | 1.07     | 1.86     | 0     | 2.29                                        | 0.58     | 9.09     | 84.99 |
|                   | Degree             | 0.99                   | 0.80     | 1.22     | 51.11 | 1.47                   | 1.27     | 1.70     | 50.22 | 1.86                                        | 0.60     | 5.77     | 93.42 | 1.28                                        | 0.83     | 1.97     | 0     |
|                   | No degree          | 0.90                   | 0.76     | 1.07     | 57.27 | 1.66                   | 1.39     | 1.99     | 74.77 | 1.40                                        | 1.15     | 1.72     | 1.2   | 2.21                                        | 1.05     | 4.65     | 74.68 |
|                   | 16-29y             | 0.76                   | 0.56     | 1.03     | 0     | 1.41                   | 1.15     | 1.72     | 0     | 3.35                                        | 2.13     | 5.27     | *     | 1.46                                        | 0.48     | 4.43     | *     |
|                   | 30-49y             | 0.80                   | 0.66     | 0.96     | 0     | 1.41                   | 1.15     | 1.72     | 58.96 | 1.20                                        | 0.78     | 1.84     | 33.3  | 1.60                                        | 0.65     | 3.93     | 60.62 |
|                   | 50+y               | 0.85                   | 0.65     | 1.12     | 77.53 | 1.61                   | 1.17     | 2.23     | 91.74 | 1.31                                        | 1.05     | 1.63     | 0     | 1.62                                        | 0.68     | 3.87     | 87.1  |
|                   | No longer employed | Overall                | 0.99     | 0.85     | 1.16  | 0                      | 1.45     | 1.24     | 1.70  | 39.21                                       | 1.35     | 0.68     | 2.66  | 72.61                                       | 1.14     | 0.63     | 2.05  |
| female            |                    | 1.05                   | 0.89     | 1.24     | 0     | 1.32                   | 1.11     | 1.58     | 22.6  | 2.18                                        | 1.46     | 3.26     | 0     | 2.03                                        | 0.94     | 4.37     | *     |
| male              |                    | 1.04                   | 0.74     | 1.48     | 0     | 1.62                   | 1.28     | 2.05     | 36    | 6.38                                        | 1.89     | 21.51    | *     | no information                              |          |          |       |
| Degree            |                    | 1.16                   | 0.90     | 1.49     | 15.71 | 1.32                   | 1.32     | 1.10     | 1.58  | 21.63                                       | 4.94     | 94.68    | *     | no information                              |          |          |       |
| No degree         |                    | 0.98                   | 0.80     | 1.20     | 0     | 1.56                   | 1.50     | 1.25     | 1.80  | 1.90                                        | 1.13     | 3.18     | 0     | 1.49                                        | 0.59     | 3.80     |       |
| 16-29y            |                    | 0.93                   | 0.56     | 1.53     | 26.47 | 1.25                   | 0.92     | 1.69     | 0     | 3.64                                        | 1.92     | 6.92     | *     | no information                              |          |          |       |
| 30-49y            |                    | 0.81                   | 0.51     | 1.30     | 0     | 1.46                   | 1.17     | 1.81     | 0     | 1.83                                        | 0.73     | 4.56     | *     | no information                              |          |          |       |
| 50+y              |                    | 0.97                   | 0.79     | 1.18     | 0     | 1.49                   | 1.21     | 1.83     | 45.91 | 1.44                                        | 0.73     | 2.84     | 67.03 | 1.59                                        | 0.79     | 3.22     |       |
| Stable unemployed |                    | Overall                | 1.09     | 0.84     | 1.40  | 26.48                  | 1.32     | 1.04     | 1.68  | 21.88                                       | 1.54     | 0.87     | 2.73  | 39.19                                       | 0.35     | 0.13     | 0.96  |
|                   | female             | 1.03                   | 0.75     | 1.42     | 26.25 | 1.37                   | 1.12     | 1.68     | 0     | 1.74                                        | 0.82     | 3.67     | *     | 0.57                                        | 0.19     | 1.67     | *     |
|                   | male               | 1.45                   | 0.97     | 2.17     | 34.27 | 1.11                   | 0.57     | 2.17     | 68.03 | 3.97                                        | 1.17     | 13.44    | *     | no information                              |          |          |       |
|                   | Degree             | 1.15                   | 0.73     | 1.82     | 0     | 1.34                   | 1.25     | 0.84     | 1.84  | no information                              |          |          |       | no information                              |          |          |       |
|                   | No degree          | 1.20                   | 0.93     | 1.55     | 0     | 1.39                   | 1.44     | 1.10     | 1.88  | 2.02                                        | 1.14     | 3.56     | 0     | 0.35                                        | 0.12     | 1.02     |       |
|                   | 16-29y             | 1.07                   | 0.66     | 1.76     | *     | 1.21                   | 0.78     | 1.86     | 0     | 2.91                                        | 1.40     | 6.06     | *     | no information                              |          |          |       |
|                   | 30-49y             | 1.12                   | 0.70     | 1.82     | 0     | 1.17                   | 0.78     | 1.74     | 0     | 1.41                                        | 0.49     | 4.07     | *     | no information                              |          |          |       |
|                   | 50+y               | 0.84                   | 0.51     | 1.38     | 51.96 | 1.25                   | 0.90     | 1.74     | 26.11 | 1.00                                        | 0.51     | 1.94     | 0     | no information                              |          |          |       |

\* indicates only one study included

**Table 5. Analysis of change excluding studies with  $\leq 2$  cell counts**

|                    |           | Fewer fruit and veg |          |          |       | More fruit and veg |          |          |       |
|--------------------|-----------|---------------------|----------|----------|-------|--------------------|----------|----------|-------|
|                    |           | RR                  | Lower CI | Upper CI | I2%   | RR                 | Lower CI | Upper CI | I2%   |
| Furloughed         | Overall   | 0.96                | 0.87     | 1.08     | 8.96  | 1.22               | 1.04     | 1.43     | 52.46 |
|                    | female    | 0.91                | 0.81     | 1.02     | 0     | 1.16               | 1.03     | 1.31     | 5.34  |
|                    | male      | 1.03                | 0.90     | 1.19     | 1.11  | 1.21               | 0.98     | 1.50     | 40.11 |
|                    | Degree    | 0.95                | 0.70     | 1.29     | 63.37 | 1.17               | 1.04     | 1.33     | 0     |
|                    | No degree | 0.97                | 0.87     | 1.09     | 0     | 1.26               | 0.99     | 1.61     | 62.7  |
|                    | 16-29y    | 0.75                | 0.38     | 1.47     | 75.61 | 1.18               | 0.91     | 1.52     | 0     |
|                    | 30-49y    | 0.88                | 0.76     | 1.03     | 0     | 1.16               | 0.90     | 1.50     | 42.19 |
|                    | 50+y      | 1.05                | 0.93     | 1.18     | 0     | 1.16               | 0.90     | 1.51     | 78.74 |
| No longer employed | Overall   | 0.74                | 0.44     | 1.22     | 64.1  | 1.02               | 0.83     | 1.25     | 0     |
|                    | female    | 0.84                | 0.65     | 1.08     | 0     | 1.23               | 1.00     | 1.51     | 0     |
|                    | male      | 1.19                | 0.93     | 1.50     | 0     | 0.86               | 0.56     | 1.30     | 23.15 |
|                    | Degree    | 0.78                | 0.52     | 1.18     | 25.58 | 1.14               | 0.89     | 1.45     | 0     |
|                    | No degree | 1.11                | 0.87     | 1.41     | 0     | 1.07               | 0.68     | 1.68     | 48.26 |
|                    | 16-29y    | 0.82                | 0.50     | 1.36     | 18.7  | 1.12               | 0.76     | 1.66     | 0     |
|                    | 30-49y    | 0.80                | 0.28     | 2.25     | 80.55 | 0.94               | 0.38     | 2.34     | 73.5  |
|                    | 50+y      | 0.96                | 0.76     | 1.21     | 0     | 1.00               | 0.80     | 1.24     | 0     |
| Stable unemployed  | Overall   | 0.92                | 0.47     | 1.81     | 76.02 | 1.16               | 0.82     | 1.63     | 21.37 |
|                    | female    | 1.20                | 0.68     | 2.12     | 60.19 | 1.31               | 0.86     | 2.00     | 35.61 |
|                    | male      | 0.91                | 0.53     | 1.57     | 0     | 1.22               | 0.63     | 2.38     | 49.82 |
|                    | Degree    | 0.63                | 0.26     | 1.50     | 43.9  | 1.78               | 0.93     | 3.40     | 63.88 |
|                    | No degree | 0.93                | 0.33     | 2.59     | 86.33 | 1.07               | 0.53     | 2.16     | 70.2  |
|                    | 16-29y    | 0.63                | 0.18     | 2.19     | 77.06 | 0.62               | 0.28     | 1.36     | 14.56 |
|                    | 30-49y    | 0.65                | 0.29     | 1.44     | 40.92 | 1.84               | 1.34     | 2.54     | 0     |
|                    | 50+y      | 1.22                | 0.54     | 2.74     | 80.15 | 1.18               | 0.86     | 1.63     | 0     |



|                    |           | Less time/Fewer days of physical exercise |          |          |       | More time/days of physical exercise |          |          |       |
|--------------------|-----------|-------------------------------------------|----------|----------|-------|-------------------------------------|----------|----------|-------|
|                    |           | RR                                        | Lower CI | Upper CI | I2%   | RR                                  | Lower CI | Upper CI | I2%   |
| Furloughed         | Overall   | 1.07                                      | 0.97     | 1.17     | 38.53 | 1.19                                | 1.04     | 1.36     | 75.78 |
|                    | female    | 1.01                                      | 0.90     | 1.12     | 31.88 | 1.20                                | 1.08     | 1.34     | 46.48 |
|                    | male      | 1.16                                      | 1.04     | 1.29     | 4.72  | 1.18                                | 0.98     | 1.43     | 65.02 |
|                    | Degree    | 1.02                                      | 0.92     | 1.13     | 0     | 1.11                                | 1.02     | 1.22     | 5.98  |
|                    | No degree | 1.10                                      | 0.99     | 1.21     | 30.03 | 1.22                                | 1.05     | 1.42     | 70.82 |
|                    | 16-29y    | 1.06                                      | 0.87     | 1.28     | 0     | 1.19                                | 0.74     | 1.91     | 69.22 |
|                    | 30-49y    | 1.11                                      | 0.89     | 1.38     | 59.5  | 1.03                                | 0.91     | 1.16     | 0     |
|                    | 50+y      | 1.04                                      | 0.86     | 1.26     | 73.46 | 1.11                                | 0.84     | 1.46     | 91.24 |
| No longer employed | Overall   | 1.07                                      | 0.93     | 1.23     | 21.00 | 1.12                                | 1.00     | 1.26     | 0.17  |
|                    | female    | 1.14                                      | 0.91     | 1.43     | 57.54 | 1.00                                | 0.85     | 1.16     | 16.71 |
|                    | male      | 0.99                                      | 0.73     | 1.33     | 46.36 | 1.31                                | 1.10     | 1.56     | 0     |
|                    | Degree    | 0.94                                      | 0.78     | 1.12     | 0     | 1.06                                | 0.91     | 1.23     | 0     |
|                    | No degree | 1.27                                      | 1.05     | 1.54     | 43.98 | 1.15                                | 1.00     | 1.33     | 0     |
|                    | 16-29y    | 0.86                                      | 0.54     | 1.36     | 49.18 | 1.27                                | 0.80     | 2.00     | 31.73 |
|                    | 30-49y    | 1.12                                      | 0.77     | 1.64     | 18.69 | 1.12                                | 0.79     | 1.59     | 35.14 |
|                    | 50+y      | 1.10                                      | 0.90     | 1.35     | 39.83 | 1.05                                | 0.91     | 1.21     | 0     |
| Stable unemployed  | Overall   | 0.85                                      | 0.67     | 1.07     | 17.33 | 1.12                                | 0.95     | 1.33     | 0     |
|                    | female    | 0.91                                      | 0.70     | 1.19     | 20.28 | 1.09                                | 0.89     | 1.33     | 0     |
|                    | male      | 0.79                                      | 0.55     | 1.13     | 0     | 1.23                                | 0.93     | 1.63     | 0     |
|                    | Degree    | 0.88                                      | 0.51     | 1.52     | 59.52 | 1.13                                | 0.90     | 1.41     | 0     |
|                    | No degree | 0.91                                      | 0.66     | 1.24     | 47.2  | 1.19                                | 0.98     | 1.44     | 0     |
|                    | 16-29y    | 0.60                                      | 0.30     | 1.19     | 0     | 1.30                                | 0.72     | 2.37     | 31.48 |
|                    | 30-49y    | 1.13                                      | 0.70     | 1.81     | 20.72 | 0.60                                | 0.34     | 1.08     | 4.48  |
|                    | 50+y      | 0.99                                      | 0.68     | 1.44     | 59.68 | 1.07                                | 0.89     | 1.29     | 0     |

|                    |           | Sleep less than before |          |          |       | Sleep more than before |          |          |       | From 6/9h a night to outside 'normal range' |          |          |       | From outside 'normal range' to 6/9h a night |          |          |       |
|--------------------|-----------|------------------------|----------|----------|-------|------------------------|----------|----------|-------|---------------------------------------------|----------|----------|-------|---------------------------------------------|----------|----------|-------|
|                    |           | RR                     | Lower CI | Upper CI | I2%   | RR                     | Lower CI | Upper CI | I2%   | RR                                          | Lower CI | Upper CI | I2%   | RR                                          | Lower CI | Upper CI | I2%   |
| Furloughed         | Overall   | 0.90                   | 0.75     | 1.07     | 70.74 | 1.63                   | 1.39     | 1.91     | 80.2  | 1.46                                        | 1.04     | 2.07     | 75.13 | 1.78                                        | 1.03     | 3.07     | 75.7  |
|                    | female    | 0.91                   | 0.80     | 1.02     | 19.62 | 1.54                   | 1.32     | 1.80     | 68.21 | 1.36                                        | 0.89     | 2.09     | 77.96 | 1.63                                        | 1.07     | 2.50     | 43.73 |
|                    | male      | 0.90                   | 0.66     | 1.22     | 69.53 | 1.71                   | 1.41     | 2.06     | 65.36 | 1.41                                        | 1.07     | 1.86     | 0     | 1.60                                        | 0.64     | 4.01     | 73.78 |
|                    | Degree    | 0.99                   | 0.80     | 1.22     | 51.11 | 1.47                   | 1.27     | 1.70     | 50.22 | 1.62                                        | 0.64     | 4.12     | 91.03 | 1.61                                        | 0.93     | 2.77     | 45.16 |
|                    | No degree | 0.90                   | 0.76     | 1.07     | 57.27 | 1.66                   | 1.39     | 1.99     | 74.77 | 1.40                                        | 1.15     | 1.72     | 1.2   | 2.21                                        | 1.05     | 4.65     | 74.68 |
|                    | 16-29y    | 0.76                   | 0.56     | 1.03     | 0     | 1.41                   | 1.15     | 1.72     | 0     | 1.67                                        | 0.36     | 7.75     | 84.08 | 1.02                                        | 0.45     | 2.32     | 0     |
|                    | 30-49y    | 0.80                   | 0.66     | 0.96     | 0     | 1.41                   | 1.15     | 1.72     | 58.96 | 1.20                                        | 0.78     | 1.84     | 33.3  | 1.35                                        | 0.79     | 2.29     | 22.42 |
|                    | 50+y      | 0.85                   | 0.65     | 1.12     | 77.53 | 1.61                   | 1.17     | 2.23     | 91.74 | 1.31                                        | 1.05     | 1.63     | 0     | 1.62                                        | 0.68     | 3.87     | 87.1  |
| No longer employed | Overall   | 0.99                   | 0.85     | 1.16     | 0     | 1.45                   | 1.24     | 1.70     | 39.21 | 1.44                                        | 0.84     | 2.49     | 70.63 | 1.53                                        | 0.93     | 2.50     | 4.52  |
|                    | female    | 1.05                   | 0.89     | 1.24     | 0     | 1.32                   | 1.11     | 1.58     | 22.6  | 1.32                                        | 0.76     | 2.30     | 59.54 | 2.24                                        | 1.20     | 4.20     | 0     |
|                    | male      | 1.02                   | 0.75     | 1.39     | 0     | 1.61                   | 1.30     | 2.01     | 29.27 | 1.71                                        | 0.77     | 3.79     | 53.91 | 1.32                                        | 0.58     | 3.01     | 0     |
|                    | Degree    | 1.17                   | 0.94     | 1.46     | 0     | 1.32                   | 1.10     | 1.58     | 15.24 | 1.68                                        | 0.51     | 5.51     | 79.65 | 1.17                                        | 0.40     | 3.40     | 0     |
|                    | No degree | 0.98                   | 0.81     | 1.18     | 0     | 1.50                   | 1.25     | 1.80     | 25.09 | 1.57                                        | 0.89     | 2.76     | 54.68 | 1.22                                        | 0.59     | 2.51     | 0     |
|                    | 16-29y    | 0.93                   | 0.56     | 1.53     | 26.47 | 1.25                   | 0.92     | 1.69     | 0     | 3.64                                        | 1.92     | 6.92     | *     | 2.25                                        | 0.52     | 9.75     | *     |
|                    | 30-49y    | 0.75                   | 0.49     | 1.15     | 0     | 1.46                   | 1.17     | 1.81     | 0     | 1.40                                        | 0.67     | 2.95     | 0     | 1.23                                        | 0.38     | 3.95     | 0     |
|                    | 50+y      | 0.97                   | 0.79     | 1.18     | 0     | 1.49                   | 1.21     | 1.83     | 45.91 | 1.28                                        | 0.69     | 2.39     | 61.19 | 1.56                                        | 0.70     | 3.43     | 47.9  |
| Stable unemployed  | Overall   | 1.08                   | 0.85     | 1.37     | 21.23 | 1.30                   | 1.06     | 1.59     | 5.00  | 1.45                                        | 0.84     | 2.51     | 33.89 | 1.13                                        | 0.10     | 12.58    | 85.65 |
|                    | female    | 1.03                   | 0.75     | 1.42     | 26.25 | 1.57                   | 1.26     | 1.94     | 18.35 | 1.58                                        | 0.92     | 2.71     | 0     | 0.82                                        | 0.27     | 2.49     | 20.78 |
|                    | male      | 1.45                   | 0.97     | 2.17     | 34.27 | 1.11                   | 0.57     | 2.17     | 68.03 | 1.71                                        | 0.79     | 3.69     | 23.67 |                                             |          |          |       |
|                    | Degree    | 1.12                   | 0.77     | 1.62     | 0     | 1.55                   | 0.93     | 2.57     | 79.22 | 2.19                                        | 1.02     | 4.70     | 0     |                                             |          |          |       |
|                    | No degree | 1.14                   | 0.90     | 1.44     | 2.16  | 1.44                   | 1.10     | 1.88     | 27.39 | 1.66                                        | 1.02     | 2.69     | 0     | 1.80                                        | 0.34     | 9.66     | 83.06 |
|                    | 16-29y    | 1.25                   | 0.78     | 2.01     | 12.63 | 1.21                   | 0.78     | 1.86     | 0     | 2.91                                        | 1.40     | 6.06     | *     | 4.15                                        | 0.90     | 19.23    |       |
|                    | 30-49y    | 1.12                   | 0.70     | 1.82     | 0     | 1.17                   | 0.78     | 1.74     | 0     | 1.41                                        | 0.49     | 4.07     | *     | 1.06                                        | 0.36     | 3.13     |       |
|                    | 50+y      | 0.84                   | 0.51     | 1.38     | 51.96 | 1.29                   | 1.01     | 1.66     | 0.8   | 1.00                                        | 0.51     | 1.94     | 0     |                                             |          |          |       |

\* indicates only one study included

**Table 6. Analysis of change excluding studies with zero cell counts**

|                    |           | Fewer fruit and veg |          |          |       | More fruit and veg |          |          |       |
|--------------------|-----------|---------------------|----------|----------|-------|--------------------|----------|----------|-------|
|                    |           | RR                  | Lower CI | Upper CI | I2%   | RR                 | Lower CI | Upper CI | I2%   |
| Furloughed         | Overall   | 0.96                | 0.87     | 1.08     | 8.96  | 1.22               | 1.04     | 1.43     | 52.46 |
|                    | female    | 0.91                | 0.81     | 1.02     | 0     | 1.16               | 1.03     | 1.31     | 5.34  |
|                    | male      | 1.03                | 0.90     | 1.19     | 1.11  | 1.21               | 0.98     | 1.50     | 40.11 |
|                    | Degree    | 0.95                | 0.70     | 1.29     | 63.37 | 1.17               | 1.04     | 1.33     | 0     |
|                    | No degree | 0.97                | 0.87     | 1.09     | 0     | 1.26               | 0.99     | 1.61     | 62.7  |
|                    | 16-29y    | 0.75                | 0.38     | 1.47     | 75.61 | 1.18               | 0.91     | 1.52     | 0     |
|                    | 30-49y    | 0.88                | 0.76     | 1.03     | 0     | 1.16               | 0.90     | 1.50     | 42.19 |
|                    | 50+y      | 1.05                | 0.93     | 1.18     | 0     | 1.16               | 0.90     | 1.51     | 78.74 |
| No longer employed | Overall   | 0.74                | 0.44     | 1.22     | 64.1  | 1.02               | 0.83     | 1.25     | 0     |
|                    | female    | 0.78                | 0.56     | 1.10     | 14.94 | 1.23               | 1.00     | 1.51     | 0     |
|                    | male      | 1.16                | 0.91     | 1.47     | 0     | 0.85               | 0.58     | 1.24     | 13.66 |
|                    | Degree    | 0.78                | 0.52     | 1.18     | 25.58 | 1.14               | 0.89     | 1.45     | 0     |
|                    | No degree | 1.05                | 0.83     | 1.34     | 0     | 1.07               | 0.68     | 1.68     | 48.26 |
|                    | 16-29y    | 0.82                | 0.50     | 1.36     | 18.7  | 1.12               | 0.76     | 1.66     | 0     |
|                    | 30-49y    | 0.80                | 0.28     | 2.25     | 80.55 | 0.94               | 0.38     | 2.34     | 73.5  |
|                    | 50+y      | 0.96                | 0.76     | 1.21     | 0     | 1.00               | 0.80     | 1.24     | 0     |
| Stable unemployed  | Overall   | 0.85                | 0.45     | 1.59     | 71.11 | 1.16               | 0.82     | 1.63     | 21.37 |
|                    | female    | 1.06                | 0.66     | 1.70     | 42.23 | 1.31               | 0.86     | 2.00     | 35.61 |
|                    | male      | 0.87                | 0.38     | 1.99     | 57.38 | 1.19               | 0.69     | 2.05     | 24.75 |
|                    | Degree    | 0.72                | 0.44     | 1.19     | 0.08  | 1.78               | 0.93     | 3.40     | 63.88 |
|                    | No degree | 0.87                | 0.42     | 1.82     | 70.36 | 1.07               | 0.53     | 2.16     | 70.2  |
|                    | 16-29y    | 0.63                | 0.18     | 2.19     | 77.06 | 0.62               | 0.28     | 1.36     | 14.56 |
|                    | 30-49y    | 0.65                | 0.29     | 1.44     | 40.92 | 1.84               | 1.34     | 2.54     | 0     |
|                    | 50+y      | 1.02                | 0.48     | 2.19     | 71.06 | 1.18               | 0.86     | 1.63     | 0     |

|                    |           | Less time/Fewer days of physical exercise |          |          |       | More time/days of physical exercise |          |          |       |
|--------------------|-----------|-------------------------------------------|----------|----------|-------|-------------------------------------|----------|----------|-------|
|                    |           | RR                                        | Lower CI | Upper CI | I2%   | RR                                  | Lower CI | Upper CI | I2%   |
| Furloughed         | Overall   | 1.07                                      | 0.97     | 1.17     | 38.53 | 1.19                                | 1.04     | 1.36     | 75.78 |
|                    | female    | 1.01                                      | 0.90     | 1.12     | 31.88 | 1.20                                | 1.08     | 1.34     | 46.48 |
|                    | male      | 1.16                                      | 1.04     | 1.29     | 4.72  | 1.18                                | 0.98     | 1.43     | 65.02 |
|                    | Degree    | 1.02                                      | 0.92     | 1.13     | 0     | 1.11                                | 1.02     | 1.22     | 5.98  |
|                    | No degree | 1.10                                      | 0.99     | 1.21     | 30.03 | 1.22                                | 1.05     | 1.42     | 70.82 |
|                    | 16-29y    | 1.06                                      | 0.87     | 1.28     | 0     | 1.19                                | 0.74     | 1.91     | 69.22 |
|                    | 30-49y    | 1.11                                      | 0.89     | 1.38     | 59.5  | 1.03                                | 0.91     | 1.16     | 0     |
|                    | 50+y      | 1.04                                      | 0.86     | 1.26     | 73.46 | 1.11                                | 0.84     | 1.46     | 91.24 |
| No longer employed | Overall   | 1.07                                      | 0.93     | 1.23     | 21.00 | 1.12                                | 1.00     | 1.26     | 0.17  |
|                    | female    | 1.14                                      | 0.91     | 1.43     | 57.54 | 1.00                                | 0.85     | 1.16     | 16.71 |
|                    | male      | 0.99                                      | 0.73     | 1.33     | 46.36 | 1.31                                | 1.10     | 1.56     | 0     |
|                    | Degree    | 0.93                                      | 0.78     | 1.11     | 0     | 1.06                                | 0.91     | 1.23     | 0     |
|                    | No degree | 1.27                                      | 1.05     | 1.54     | 43.98 | 1.15                                | 1.00     | 1.33     | 0     |
|                    | 16-29y    | 0.86                                      | 0.54     | 1.36     | 49.18 | 1.27                                | 0.80     | 2.00     | 31.73 |
|                    | 30-49y    | 1.12                                      | 0.77     | 1.64     | 18.69 | 1.12                                | 0.79     | 1.59     | 35.14 |
|                    | 50+y      | 1.10                                      | 0.90     | 1.35     | 39.83 | 1.09                                | 0.95     | 1.24     | 0     |
| Stable unemployed  | Overall   | 0.83                                      | 0.66     | 1.05     | 15.14 | 1.11                                | 0.94     | 1.32     | 0.47  |
|                    | female    | 0.92                                      | 0.71     | 1.19     | 16.21 | 1.09                                | 0.89     | 1.32     | 0     |
|                    | male      | 0.81                                      | 0.58     | 1.13     | 0     | 1.18                                | 0.90     | 1.55     | 0     |
|                    | Degree    | 0.88                                      | 0.58     | 1.33     | 34.49 | 1.12                                | 0.91     | 1.39     | 0     |
|                    | No degree | 0.91                                      | 0.66     | 1.24     | 47.2  | 1.17                                | 0.97     | 1.43     | 0     |
|                    | 16-29y    | 0.60                                      | 0.30     | 1.19     | 0     | 1.30                                | 0.72     | 2.37     | 31.48 |
|                    | 30-49y    | 1.13                                      | 0.70     | 1.81     | 20.72 | 0.60                                | 0.34     | 1.08     | 4.48  |
|                    | 50+y      | 0.94                                      | 0.65     | 1.37     | 52.73 | 1.06                                | 0.88     | 1.28     | 0     |

|                    |           | Sleep less than before |          |          |       | Sleep more than before |          |          |       | From 6/9h a night to outside 'normal range' |          |          |       | From outside 'normal range' to 6/9h a night |          |          |       |
|--------------------|-----------|------------------------|----------|----------|-------|------------------------|----------|----------|-------|---------------------------------------------|----------|----------|-------|---------------------------------------------|----------|----------|-------|
|                    |           | RR                     | Lower CI | Upper CI | I2%   | RR                     | Lower CI | Upper CI | I2%   | RR                                          | Lower CI | Upper CI | I2%   | RR                                          | Lower CI | Upper CI | I2%   |
| Furloughed         | Overall   | 0.90                   | 0.75     | 1.07     | 70.74 | 1.63                   | 1.39     | 1.91     | 80.2  | 1.46                                        | 1.04     | 2.07     | 75.13 | 1.78                                        | 1.03     | 3.07     | 75.7  |
|                    | female    | 0.91                   | 0.80     | 1.02     | 19.62 | 1.54                   | 1.32     | 1.80     | 68.21 | 1.36                                        | 0.89     | 2.09     | 77.96 | 1.63                                        | 1.07     | 2.50     | 43.73 |
|                    | male      | 0.90                   | 0.66     | 1.22     | 69.53 | 1.71                   | 1.41     | 2.06     | 65.36 | 1.41                                        | 1.07     | 1.86     | 0     | 1.57                                        | 0.70     | 3.55     | 66.38 |
|                    | Degree    | 0.99                   | 0.80     | 1.22     | 51.11 | 1.47                   | 1.27     | 1.70     | 50.22 | 1.62                                        | 0.64     | 4.12     | 91.03 | 1.36                                        | 0.79     | 2.33     | 39.8  |
|                    | No degree | 0.90                   | 0.76     | 1.07     | 57.27 | 1.66                   | 1.39     | 1.99     | 74.77 | 1.40                                        | 1.15     | 1.72     | 1.2   | 2.21                                        | 1.05     | 4.65     | 74.68 |
|                    | 16-29y    | 0.76                   | 0.56     | 1.03     | 0     | 1.41                   | 1.15     | 1.72     | 0     | 1.67                                        | 0.36     | 7.75     | 84.08 | 1.02                                        | 0.45     | 2.32     | 0     |
|                    | 30-49y    | 0.80                   | 0.66     | 0.96     | 0     | 1.41                   | 1.15     | 1.72     | 58.96 | 1.20                                        | 0.78     | 1.84     | 33.3  | 1.35                                        | 0.79     | 2.29     | 22.42 |
|                    | 50+y      | 0.85                   | 0.65     | 1.12     | 77.53 | 1.61                   | 1.17     | 2.23     | 91.74 | 1.31                                        | 1.05     | 1.63     | 0     | 1.62                                        | 0.68     | 3.87     | 87.1  |
| No longer employed | Overall   | 0.99                   | 0.85     | 1.16     | 0     | 1.45                   | 1.24     | 1.70     | 39.21 | 1.44                                        | 0.84     | 2.49     | 70.63 | 1.49                                        | 0.93     | 2.37     | 0     |
|                    | female    | 1.05                   | 0.89     | 1.24     | 0     | 1.32                   | 1.11     | 1.58     | 22.6  | 1.32                                        | 0.76     | 2.30     | 59.54 | 1.93                                        | 1.14     | 3.26     | 0     |
|                    | male      | 0.96                   | 0.71     | 1.30     | 0     | 1.61                   | 1.30     | 2.01     | 29.27 | 1.71                                        | 0.77     | 3.79     | 53.91 | 1.51                                        | 0.74     | 3.07     | 0     |
|                    | Degree    | 1.17                   | 0.94     | 1.46     | 0     | 1.30                   | 1.08     | 1.56     | 14.39 | 1.54                                        | 0.59     | 4.00     | 74.01 | 1.25                                        | 0.61     | 2.58     | 0     |
|                    | No degree | 0.98                   | 0.81     | 1.18     | 0     | 1.50                   | 1.25     | 1.80     | 25.09 | 1.57                                        | 0.89     | 2.76     | 54.68 | 2.45                                        | 1.08     | 5.57     | 41.89 |
|                    | 16-29y    | 0.93                   | 0.56     | 1.53     | 26.47 | 1.25                   | 0.92     | 1.69     | 0     | 3.64                                        | 1.92     | 6.92     | *     | 1.78                                        | 0.59     | 5.39     | 0     |
|                    | 30-49y    | 0.75                   | 0.49     | 1.15     | 0     | 1.46                   | 1.17     | 1.81     | 0     | 1.16                                        | 0.58     | 2.30     | 8.35  | 1.58                                        | 0.65     | 3.82     | 0     |
|                    | 50+y      | 0.97                   | 0.79     | 1.18     | 0     | 1.49                   | 1.21     | 1.83     | 45.91 | 1.28                                        | 0.69     | 2.39     | 61.19 | 1.50                                        | 0.78     | 2.89     | 27.27 |
| Stable unemployed  | Overall   | 1.03                   | 0.79     | 1.33     | 28.94 | 1.30                   | 1.06     | 1.59     | 5.00  | 1.23                                        | 0.68     | 2.25     | 43.72 | 2.58                                        | 0.82     | 8.11     | 77.94 |
|                    | female    | 0.90                   | 0.64     | 1.27     | 36.82 | 1.54                   | 1.26     | 1.88     | 9.86  | 1.26                                        | 0.77     | 2.09     | 0     | 2.85                                        | 0.87     | 9.37     | 72.45 |
|                    | male      | 1.37                   | 0.91     | 2.05     | 35    | 1.04                   | 0.64     | 1.69     | 47.94 | 1.65                                        | 0.99     | 2.76     | 0     | 4.03                                        | 1.27     | 12.83    | 0     |
|                    | Degree    | 1.05                   | 0.74     | 1.51     | 0     | 1.52                   | 0.96     | 2.40     | 72.88 | 1.69                                        | 0.70     | 4.08     | 48.4  | 2.18                                        | 0.26     | 18.02    | *     |
|                    | No degree | 1.14                   | 0.90     | 1.44     | 2.16  | 1.36                   | 1.03     | 1.78     | 27.99 | 1.66                                        | 1.02     | 2.69     | 0     | 3.41                                        | 0.84     | 13.83    | 78.46 |
|                    | 16-29y    | 1.25                   | 0.78     | 2.01     | 12.63 | 1.21                   | 0.78     | 1.86     | 0     | 2.84                                        | 1.42     | 5.67     | 0     | 4.15                                        | 0.90     | 19.23    | *     |
|                    | 30-49y    | 1.53                   | 0.80     | 2.90     | 68.07 | 1.17                   | 0.78     | 1.74     | 0     | 1.34                                        | 0.60     | 2.98     | 0     | 3.77                                        | 0.81     | 17.48    | 74.69 |
|                    | 50+y      | 0.72                   | 0.43     | 1.19     | 50.84 | 1.29                   | 1.01     | 1.66     | 0.8   | 0.87                                        | 0.48     | 1.58     | 0     | 1.79                                        | 0.29     | 11.03    | 82.46 |

\* indicates only one study included

## Figure set 1: Currently eats 2 or fewer fruit & veg

Currently eats 2 or fewer fruit & veg  
Furloughed vs. Stable employed

unadjusted

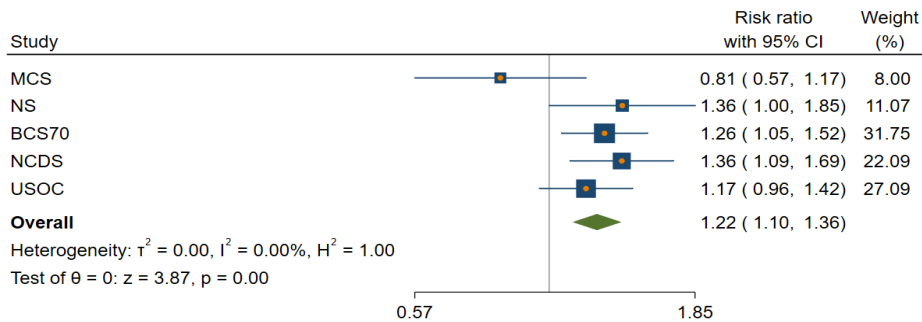

Random-effects REML model

Currently eats 2 or fewer fruit & veg  
Furloughed vs. Stable employed

basic adjustment

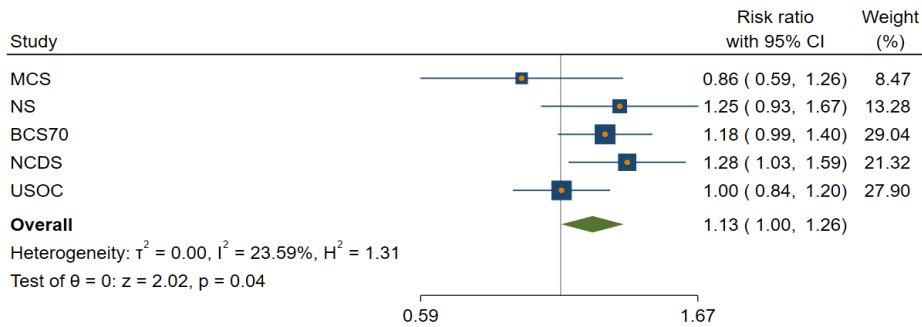

Random-effects REML model

Currently eats 2 or fewer fruit & veg  
Furloughed vs. Stable employed

full adjustment

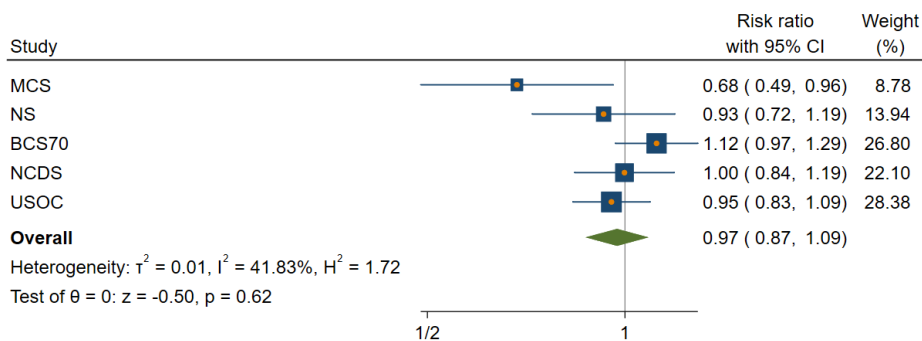

Random-effects REML model

Currently eats 2 or fewer fruit & veg  
No longer employed vs. Stable employed

unadjusted

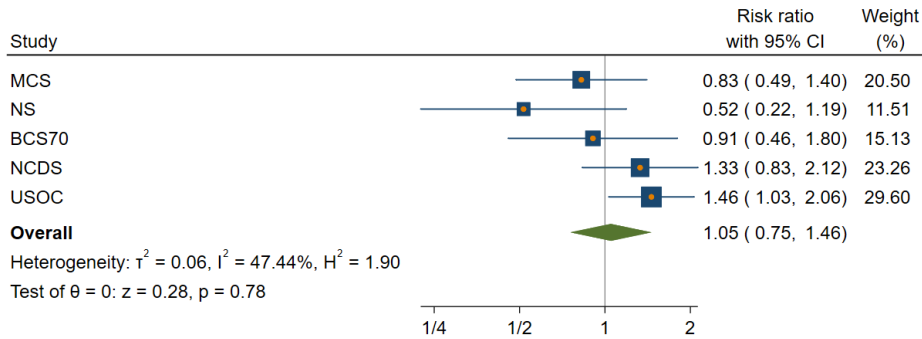

Random-effects REML model

Currently eats 2 or fewer fruit & veg  
No longer employed vs. Stable employed

basic adjustment

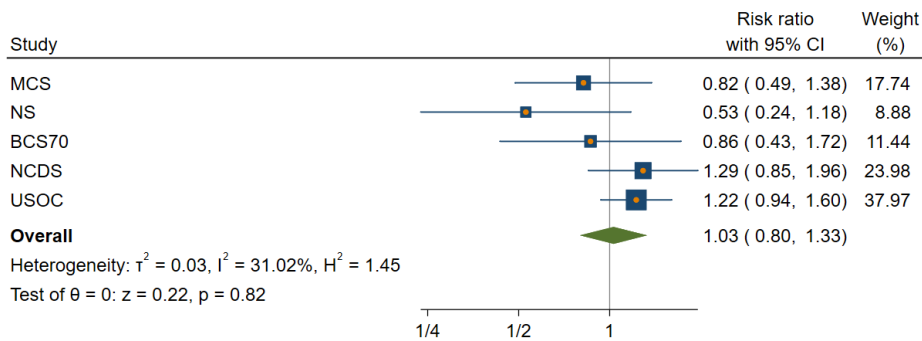

Random-effects REML model

Currently eats 2 or fewer fruit & veg  
No longer employed vs. Stable employed

full adjustment

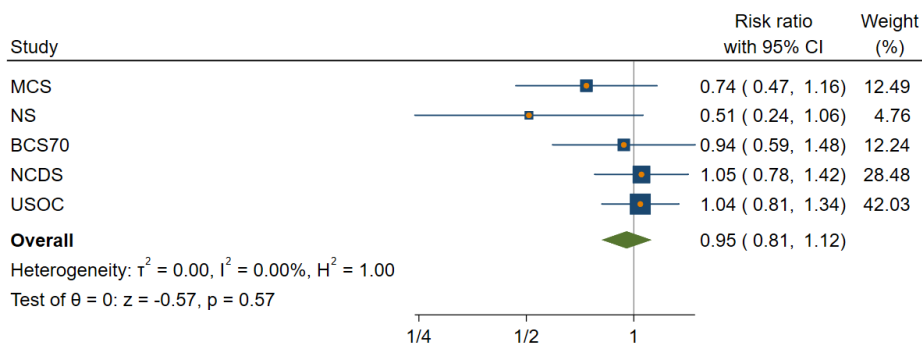

Random-effects REML model

Currently eats 2 or fewer fruit & veg  
Stable unemployed vs. Stable employed

unadjusted

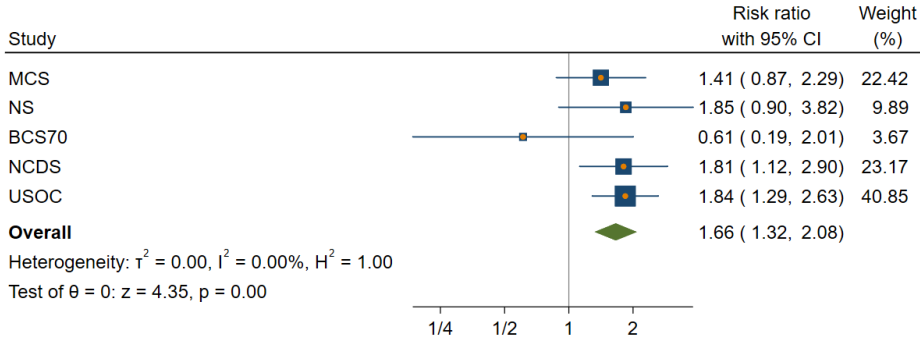

Random-effects REML model

Currently eats 2 or fewer fruit & veg  
Stable unemployed vs. Stable employed

basic adjustment

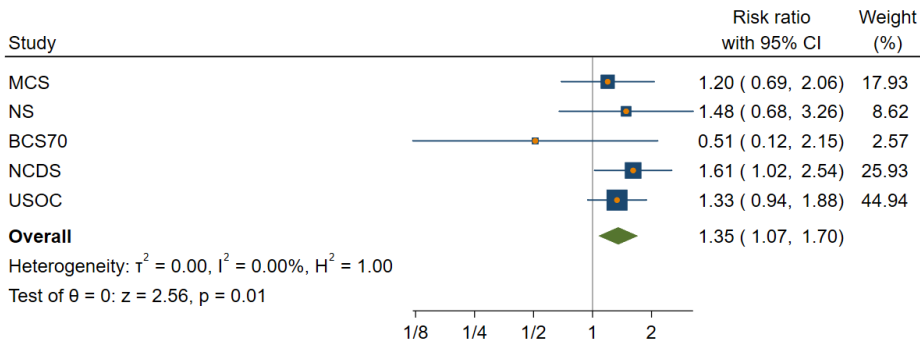

Random-effects REML model

Currently eats 2 or fewer fruit & veg  
Stable unemployed vs. Stable employed

full adjustment

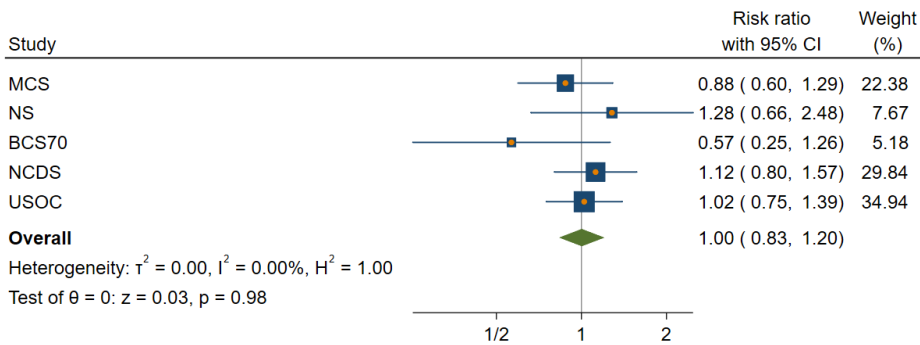

Random-effects REML model



Currently eats 2 or fewer fruit & veg  
Became employed vs. Stable employed

unadjusted

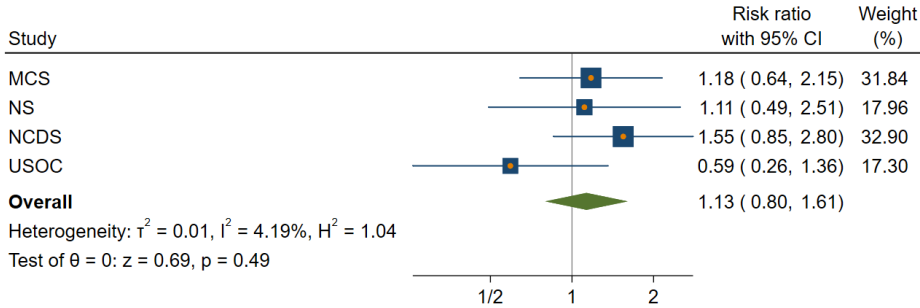

Random-effects REML model

Currently eats 2 or fewer fruit & veg  
Became employed vs. Stable employed

basic adjustment

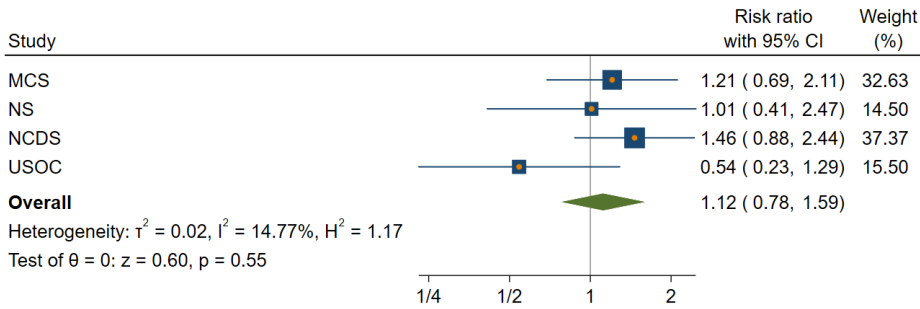

Random-effects REML model

Currently eats 2 or fewer fruit & veg  
Became employed vs. Stable employed

full adjustment

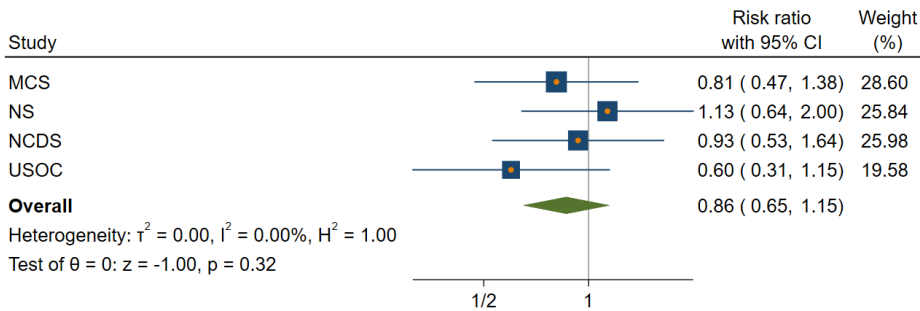

Random-effects REML model

Currently eats 2 or fewer fruit & veg  
Stable non-employed vs. Stable employed

unadjusted

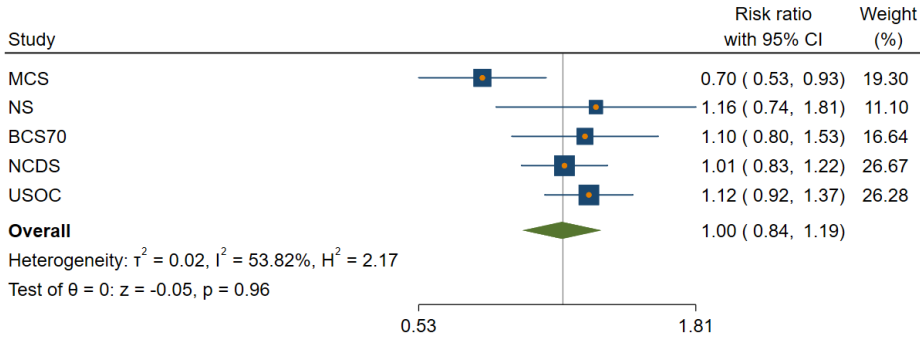

Random-effects REML model

Currently eats 2 or fewer fruit & veg  
Stable non-employed vs. Stable employed

basic adjustment

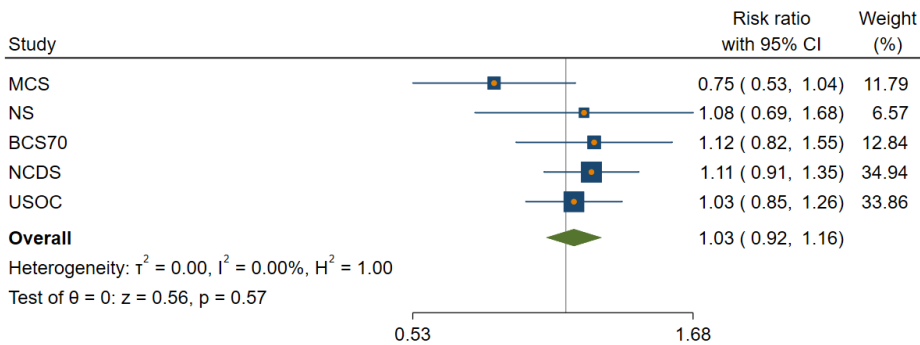

Random-effects REML model

Currently eats 2 or fewer fruit & veg  
Stable non-employed vs. Stable employed

full adjustment

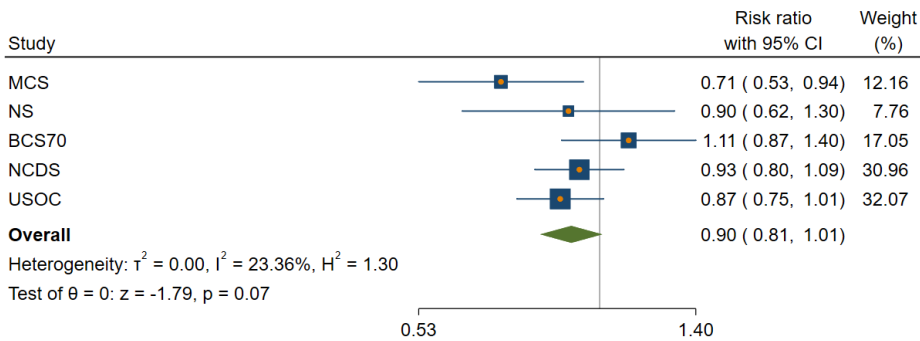

Random-effects REML model

## Figure set 2: Fewer fruit and vegetables

Fewer fruit and veg  
Furloughed vs. Stable employed

unadjusted

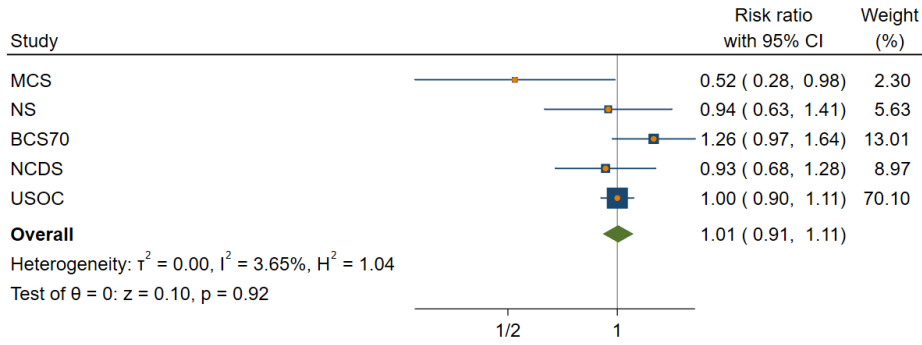

Random-effects REML model

Fewer fruit and veg  
Furloughed vs. Stable employed

basic adjustment

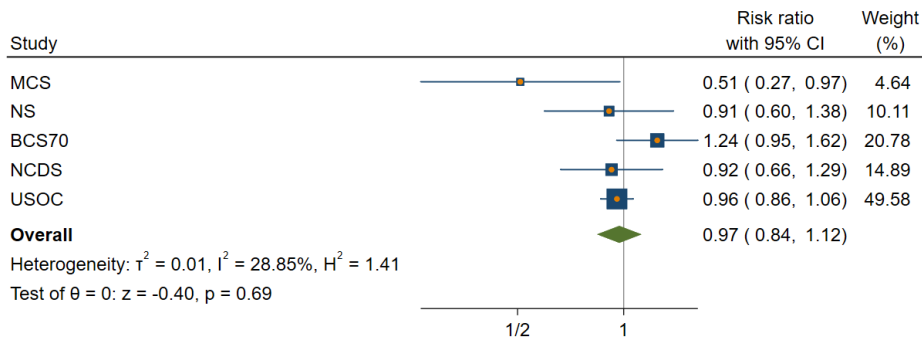

Random-effects REML model

Fewer fruit and veg  
Furloughed vs. Stable employed

full adjustment

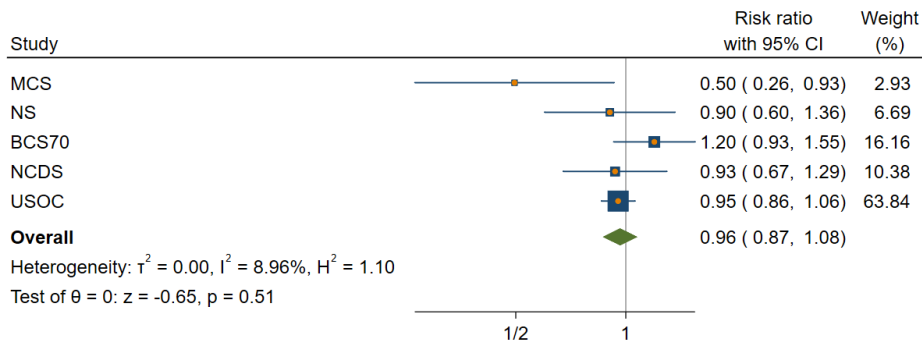

Random-effects REML model

Fewer fruit and veg  
No longer employed vs. Stable employed

unadjusted

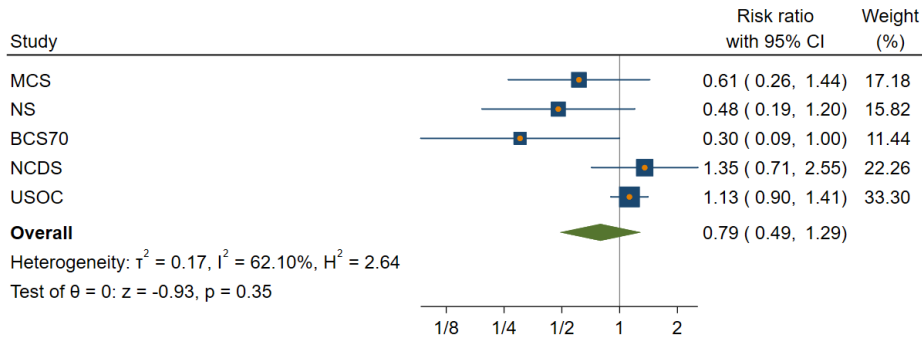

Random-effects REML model

Fewer fruit and veg  
No longer employed vs. Stable employed

basic adjustment

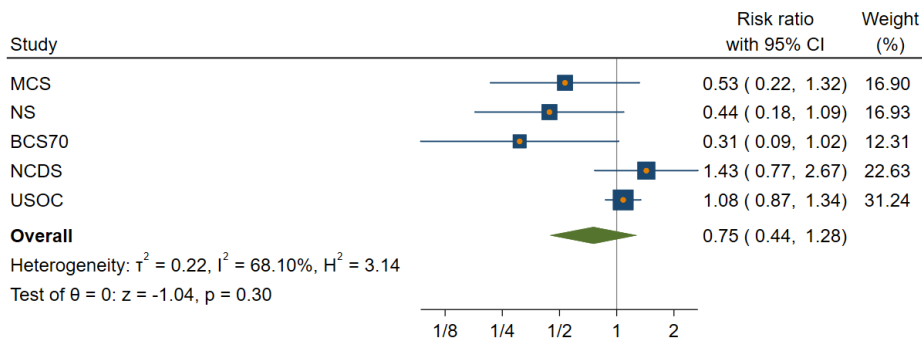

Random-effects REML model

Fewer fruit and veg  
No longer employed vs. Stable employed

full adjustment

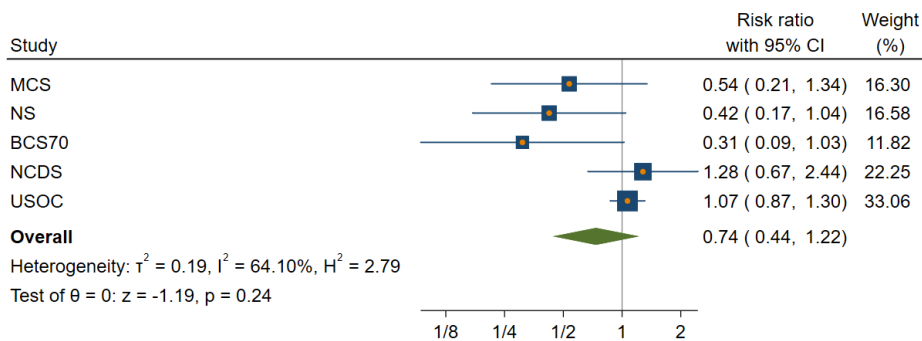

Random-effects REML model

Fewer fruit and veg  
Stable unemployed vs. Stable employed

unadjusted

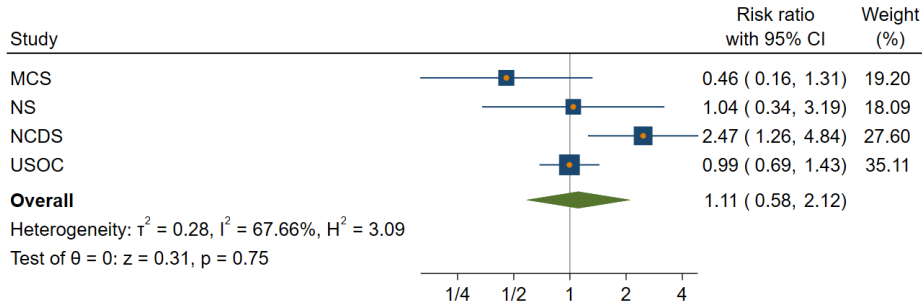

Random-effects REML model

Fewer fruit and veg  
Stable unemployed vs. Stable employed

basic adjustment

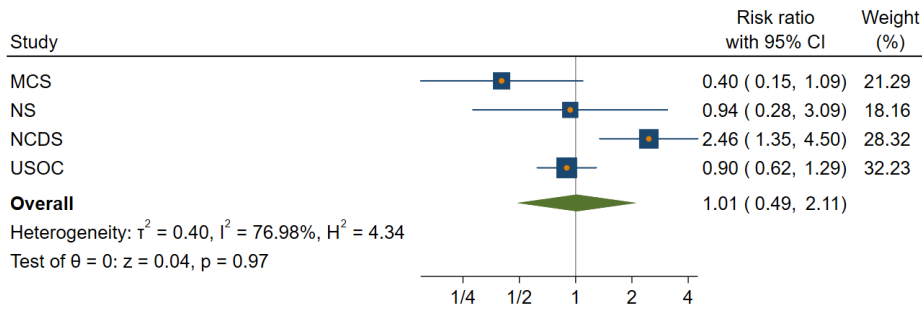

Random-effects REML model

Fewer fruit and veg  
Stable unemployed vs. Stable employed

full adjustment

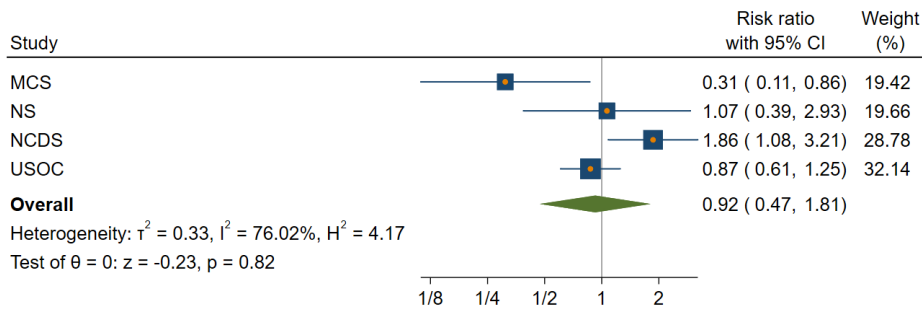

Random-effects REML model

Fewer fruit and veg  
Became employed vs. Stable employed

unadjusted

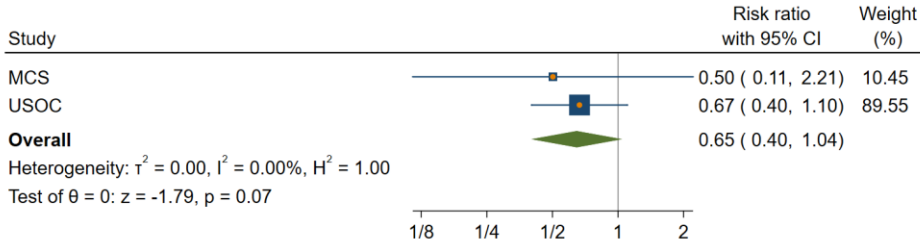

Random-effects REML model

Fewer fruit and veg  
Became employed vs. Stable employed

basic adjustment

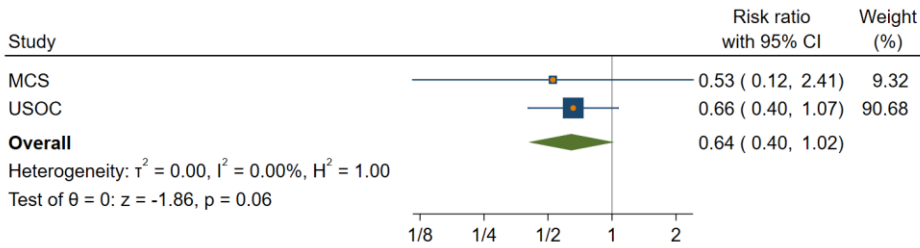

Random-effects REML model

Fewer fruit and veg  
Became employed vs. Stable employed

full adjustment

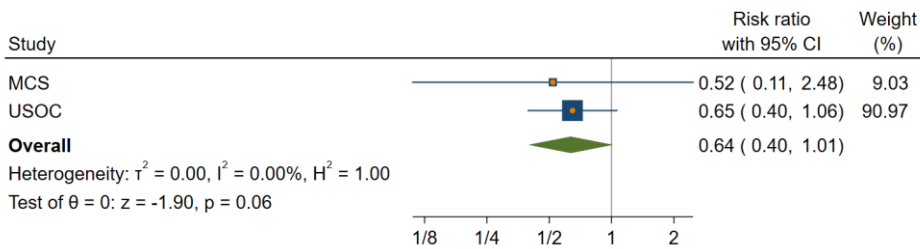

Random-effects REML model

Fewer fruit and veg  
Stable non-employed vs. Stable employed

unadjusted

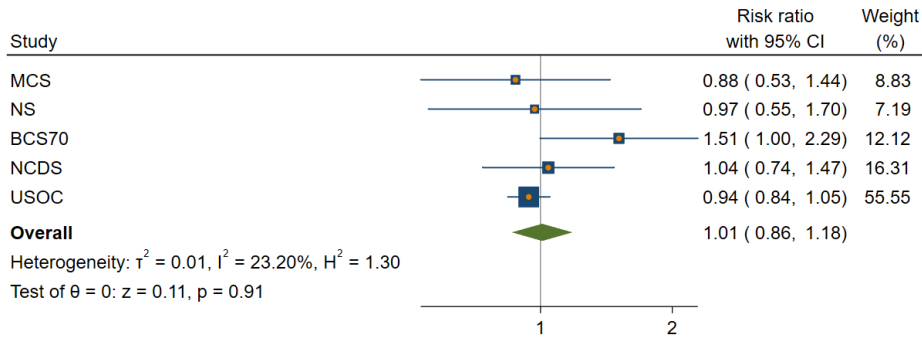

Random-effects REML model

Fewer fruit and veg  
Stable non-employed vs. Stable employed

basic adjustment

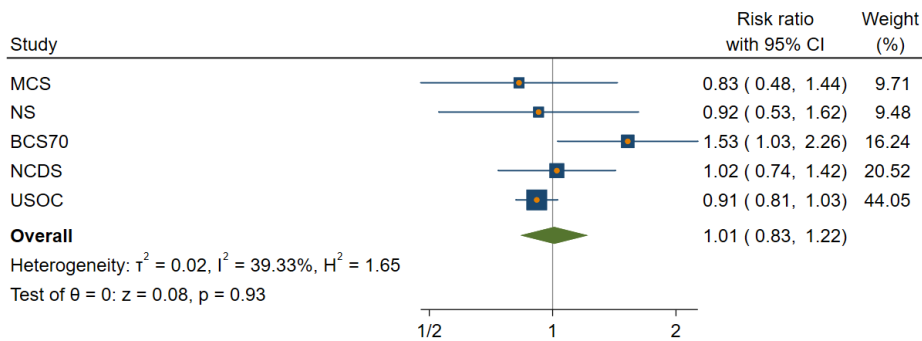

Random-effects REML model

Fewer fruit and veg  
Stable non-employed vs. Stable employed

full adjustment

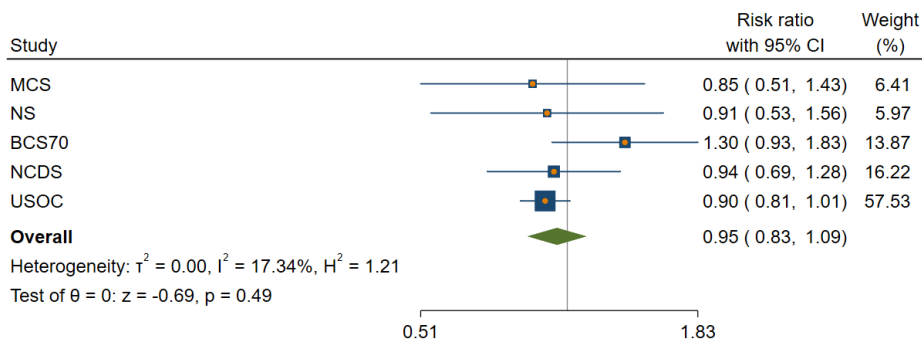

Random-effects REML model

### Figure set 3: More fruit and vegetables

More fruit and veg  
Furloughed vs. Stable employed

unadjusted

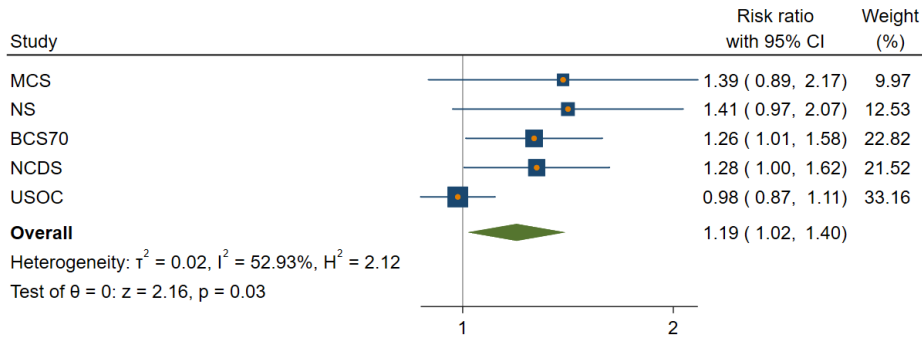

Random-effects REML model

More fruit and veg  
Furloughed vs. Stable employed

basic adjustment

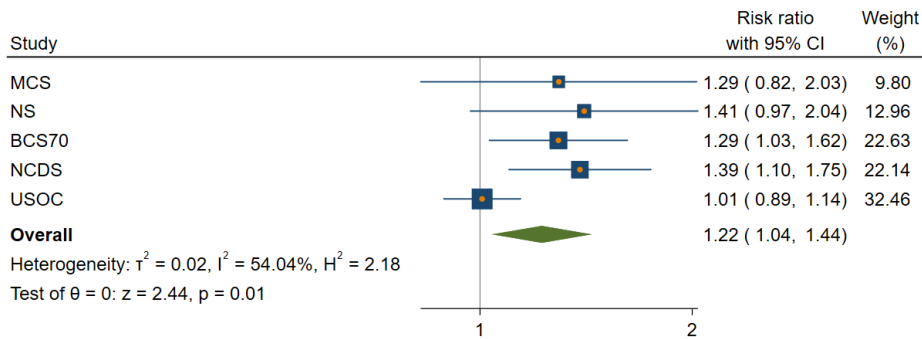

Random-effects REML model

More fruit and veg  
Furloughed vs. Stable employed

full adjustment

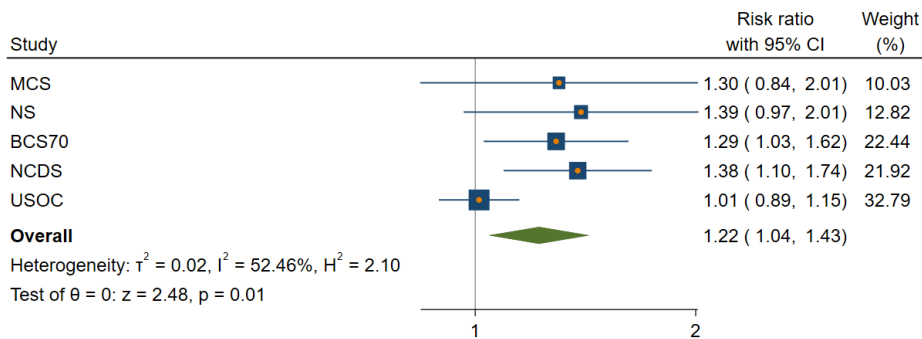

Random-effects REML model



More fruit and veg  
No longer employed vs. Stable employed

unadjusted

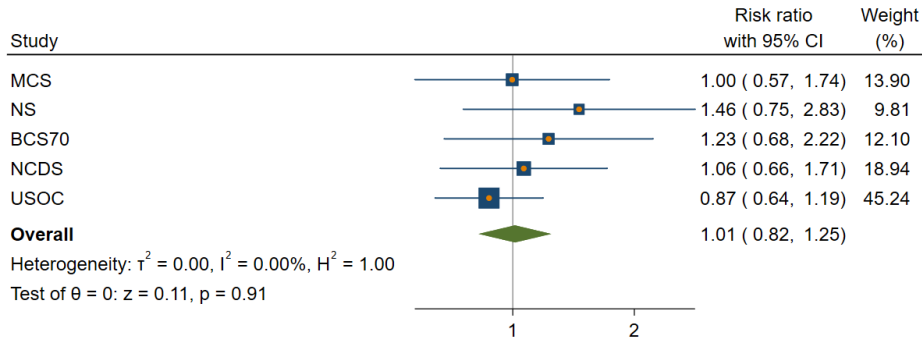

Random-effects REML model

More fruit and veg  
No longer employed vs. Stable employed

basic adjustment

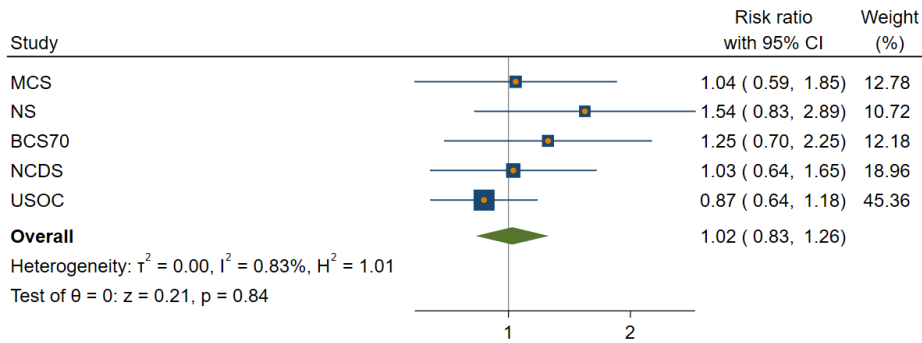

Random-effects REML model

More fruit and veg  
No longer employed vs. Stable employed

full adjustment

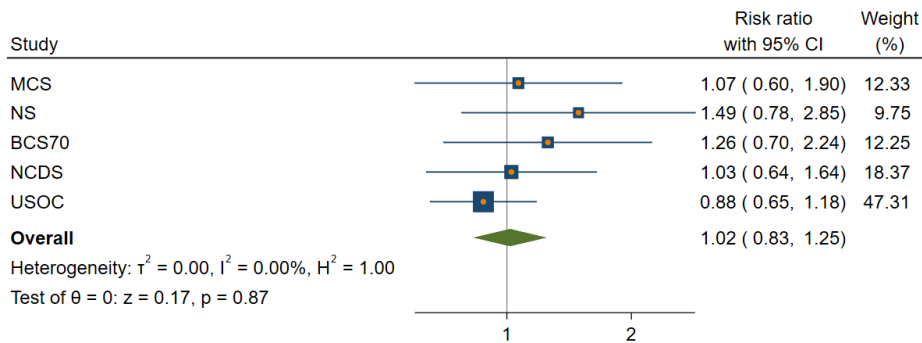

Random-effects REML model

More fruit and veg  
Stable unemployed vs. Stable employed

unadjusted

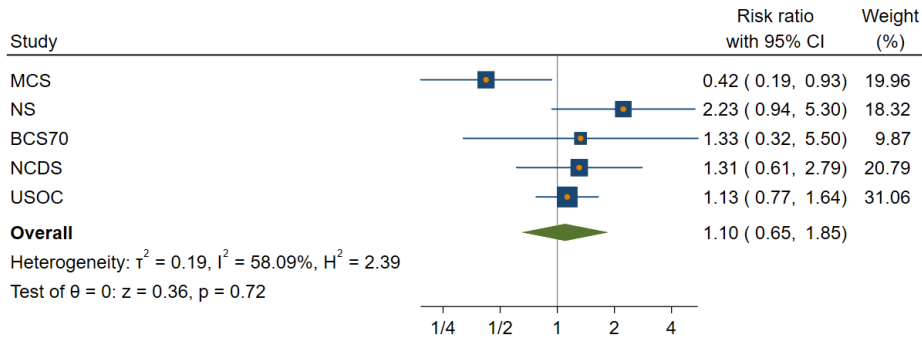

Random-effects REML model

More fruit and veg  
Stable unemployed vs. Stable employed

basic adjustment

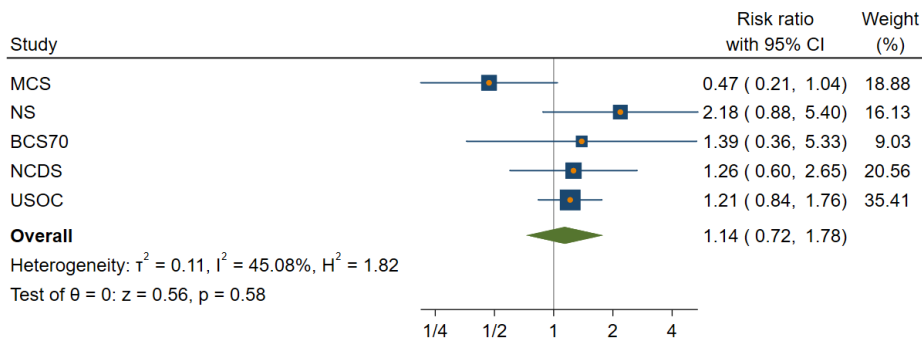

Random-effects REML model

More fruit and veg  
Stable unemployed vs. Stable employed

full adjustment

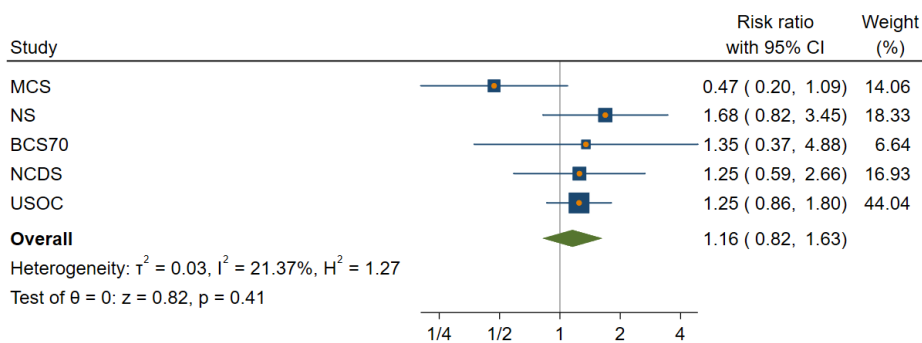

Random-effects REML model

More fruit and veg  
Became employed vs. Stable employed

unadjusted

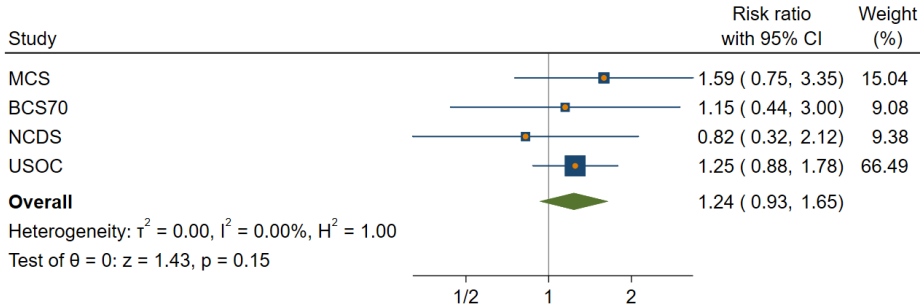

Random-effects REML model

More fruit and veg  
Became employed vs. Stable employed

basic adjustment

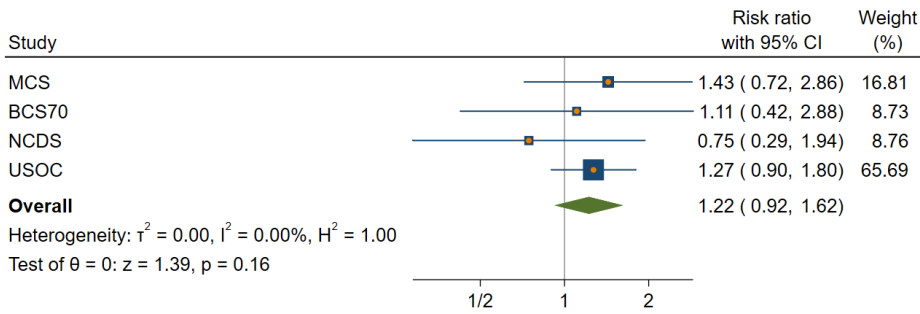

Random-effects REML model

More fruit and veg  
Became employed vs. Stable employed

full adjustment

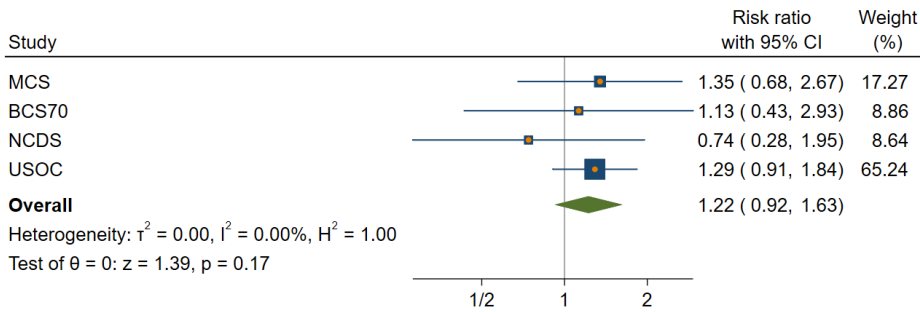

Random-effects REML model

More fruit and veg  
Stable non-employed vs. Stable employed

unadjusted

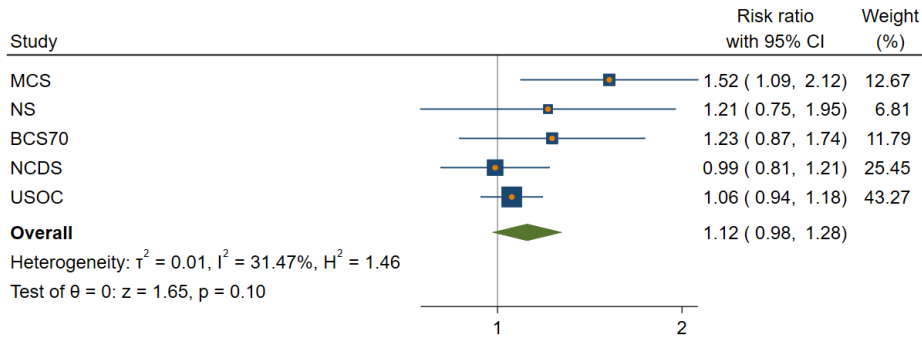

Random-effects REML model

More fruit and veg  
Stable non-employed vs. Stable employed

basic adjustment

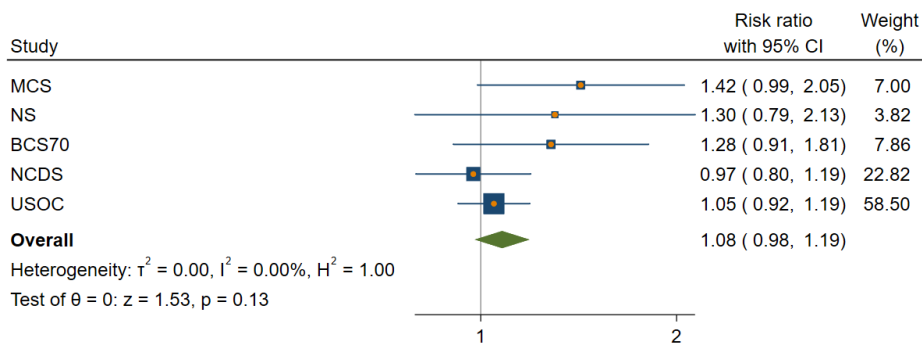

Random-effects REML model

More fruit and veg  
Stable non-employed vs. Stable employed

full adjustment

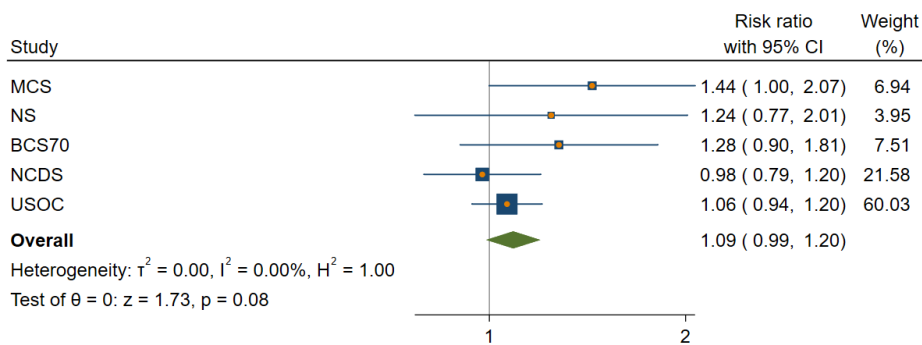

Random-effects REML model

## Figure set 4: Less than 3 days a week of at least 30 min exercise

Less than 3 days a week of at least 30min exercise  
Furloughed vs. Stable employed

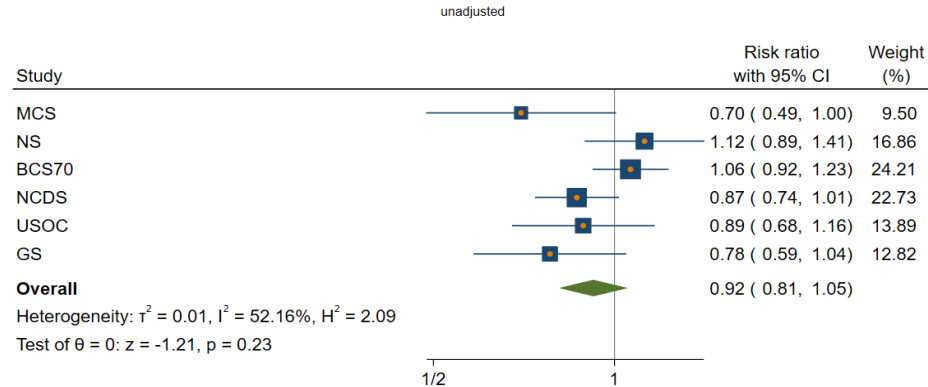

Random-effects REML model

Less than 3 days a week of at least 30min exercise  
Furloughed vs. Stable employed

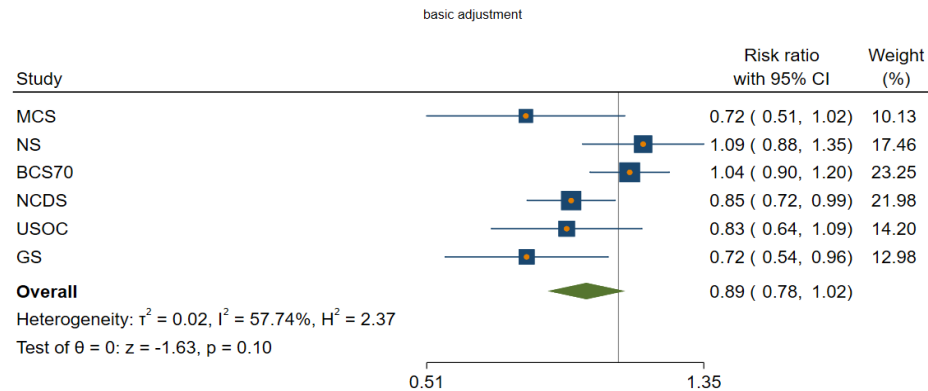

Random-effects REML model

Less than 3 days a week of at least 30min exercise  
Furloughed vs. Stable employed

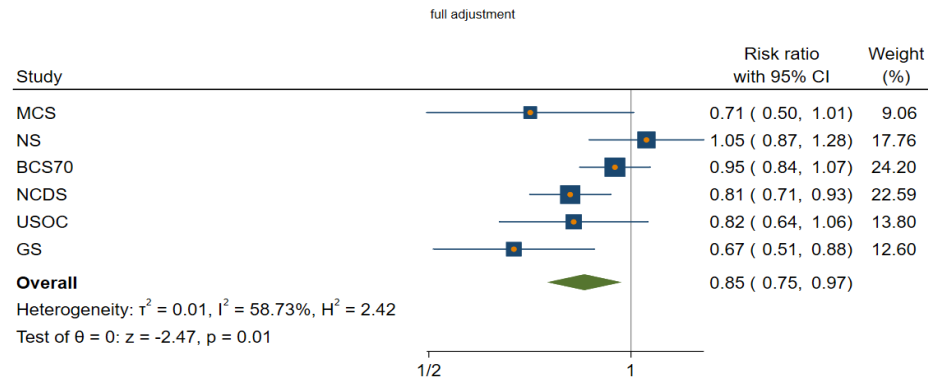

Random-effects REML model

Less than 3 days a week of at least 30min exercise  
No longer employed vs. Stable employed

unadjusted

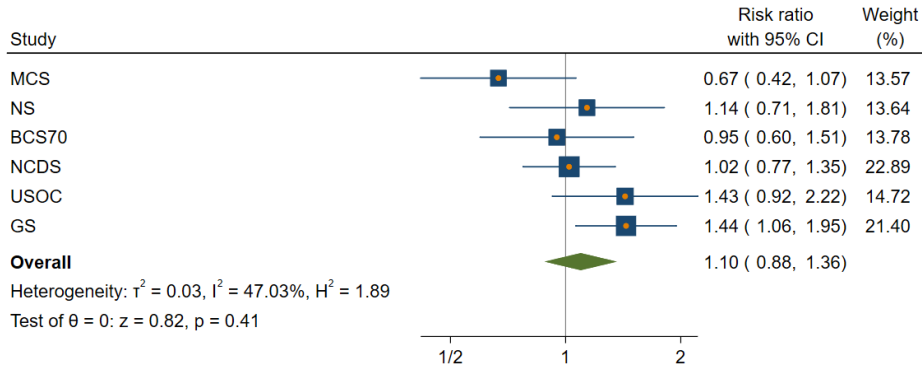

Random-effects REML model

Less than 3 days a week of at least 30min exercise  
No longer employed vs. Stable employed

basic adjustment

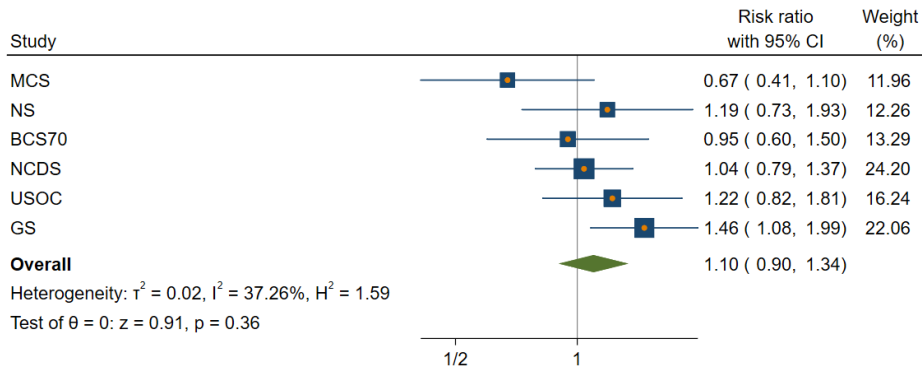

Random-effects REML model

Less than 3 days a week of at least 30min exercise  
No longer employed vs. Stable employed

full adjustment

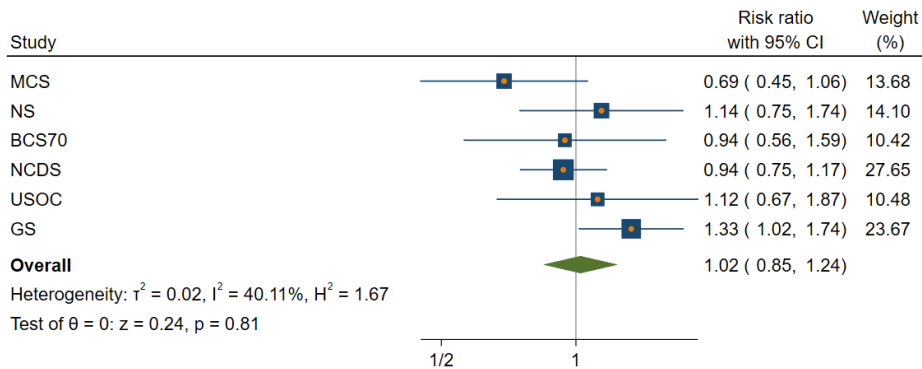

Random-effects REML model

Less than 3 days a week of at least 30min exercise  
Stable unemployed vs. Stable employed

unadjusted

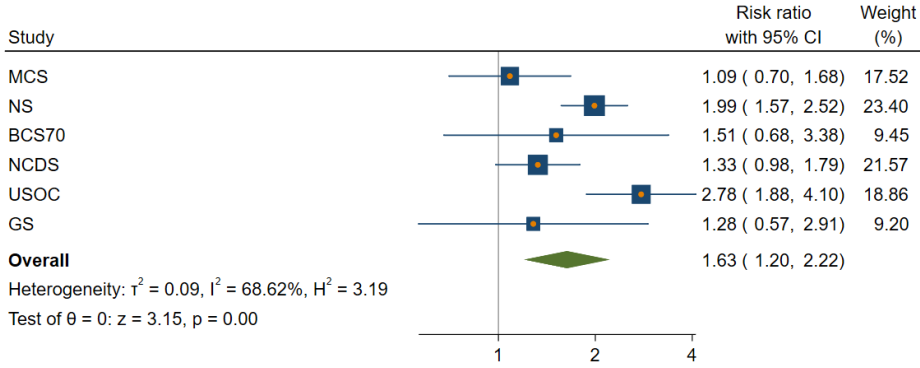

Random-effects REML model

Less than 3 days a week of at least 30min exercise  
Stable unemployed vs. Stable employed

basic adjustment

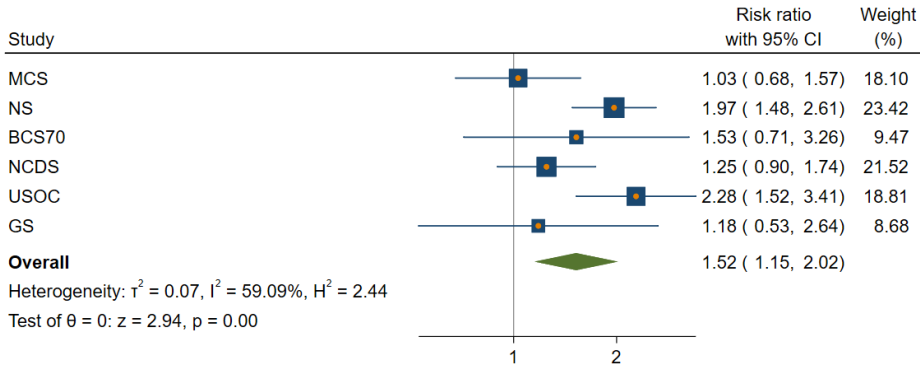

Random-effects REML model

Less than 3 days a week of at least 30min exercise  
Stable unemployed vs. Stable employed

full adjustment

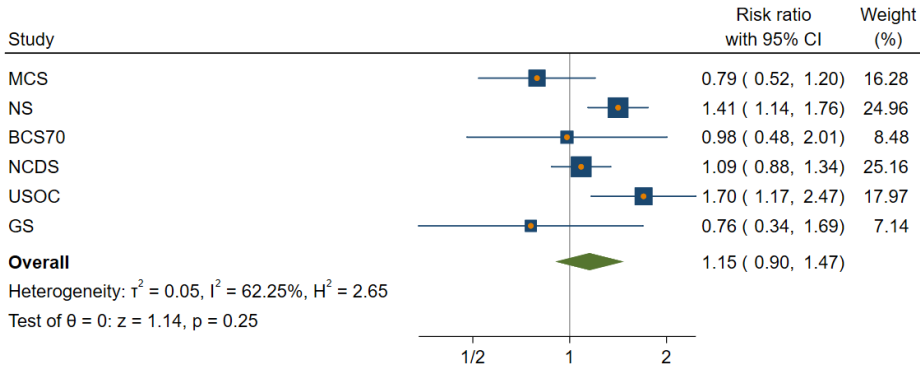

Random-effects REML model

Less than 3 days a week of at least 30min exercise  
Became employed vs. Stable employed

unadjusted

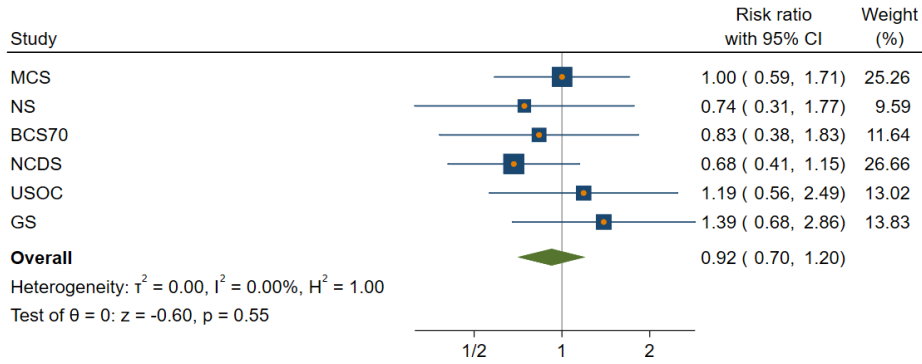

Random-effects REML model

Less than 3 days a week of at least 30min exercise  
Became employed vs. Stable employed

basic adjustment

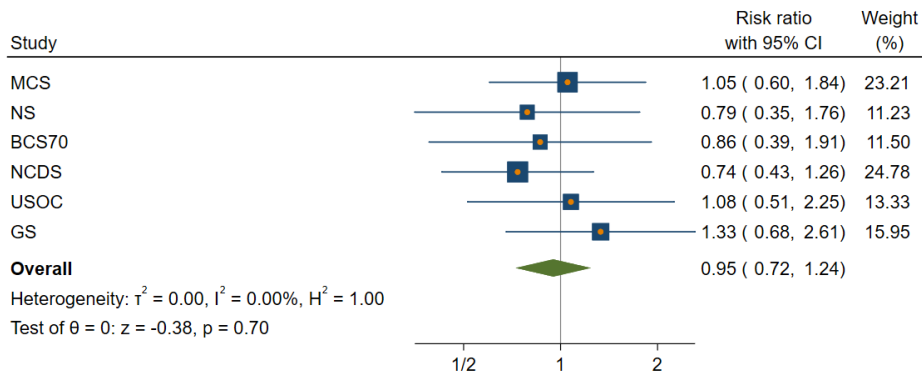

Random-effects REML model

Less than 3 days a week of at least 30min exercise  
Became employed vs. Stable employed

full adjustment

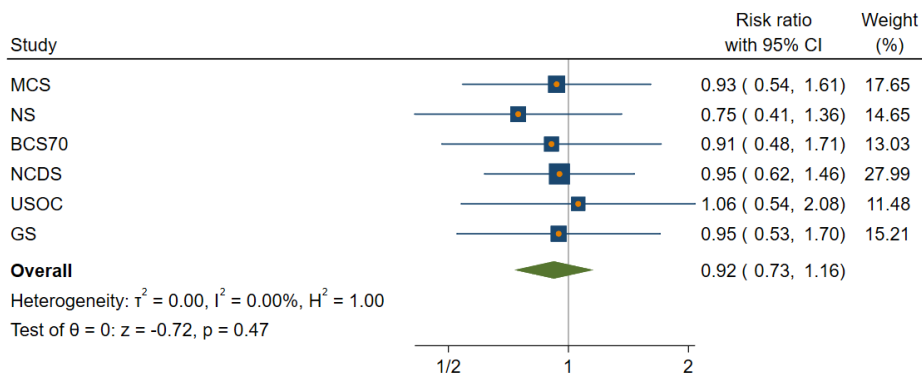

Random-effects REML model



Less than 3 days a week of at least 30min exercise  
Stable non-employed vs. Stable employed

unadjusted

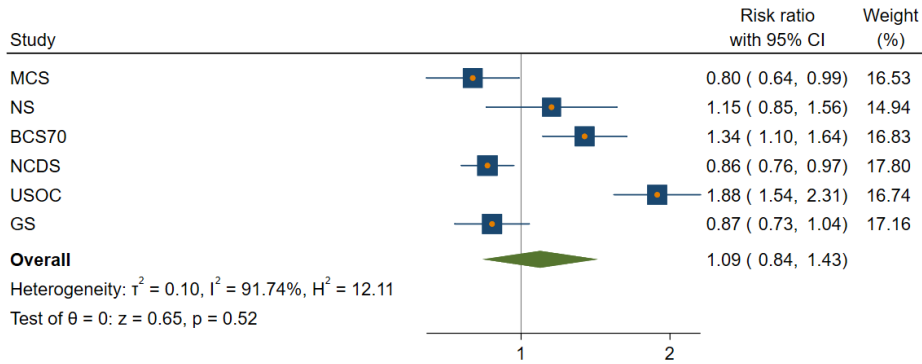

Random-effects REML model

Less than 3 days a week of at least 30min exercise  
Stable non-employed vs. Stable employed

basic adjustment

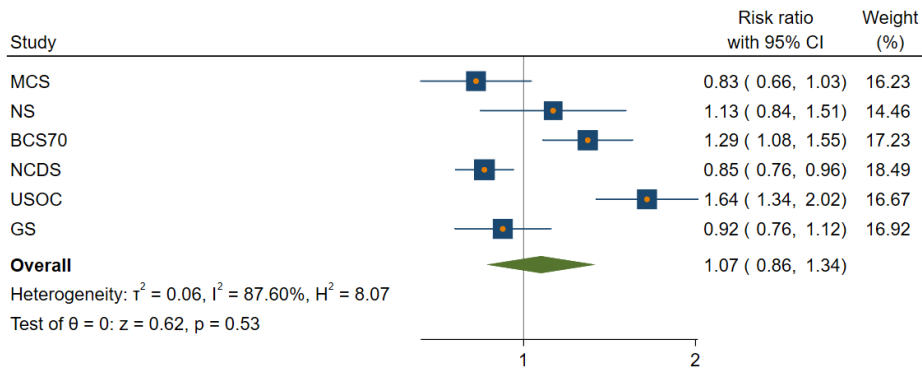

Random-effects REML model

Less than 3 days a week of at least 30min exercise  
Stable non-employed vs. Stable employed

full adjustment

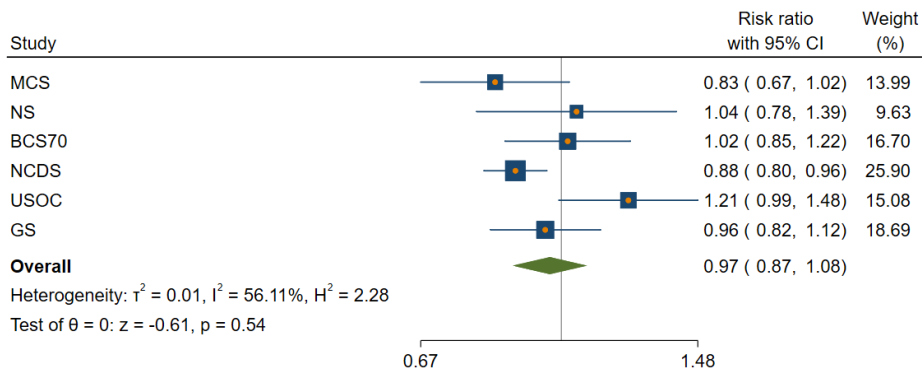

Random-effects REML model

**Figure set 5: Less time/fewer days of physical exercise**

Commented [MJ1]:

Less time/Fewer days of physical exercise  
Furloughed vs. Stable employed

unadjusted

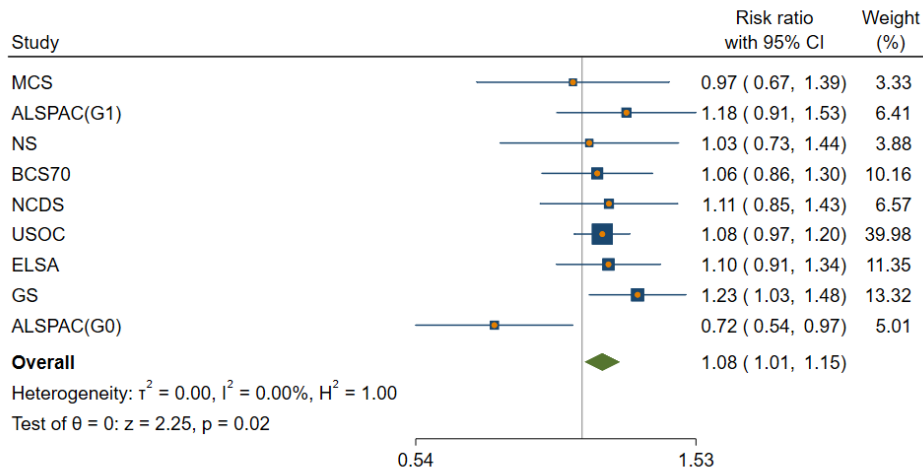

Random-effects REML model

Less time/Fewer days of physical exercise  
Furloughed vs. Stable employed

basic adjustment

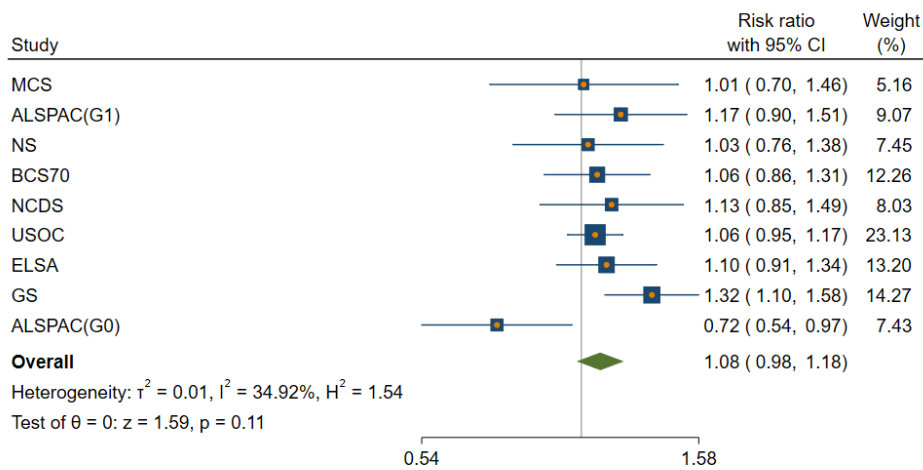

Random-effects REML model

Less time/Fewer days of physical exercise  
Furloughed vs. Stable employed

full adjustment

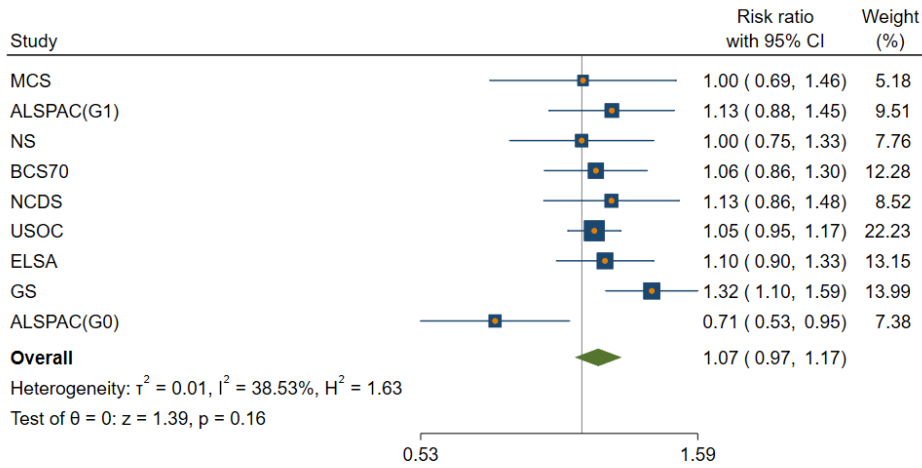

Random-effects REML model

Less time/Fewer days of physical exercise  
No longer employed vs. Stable employed

unadjusted

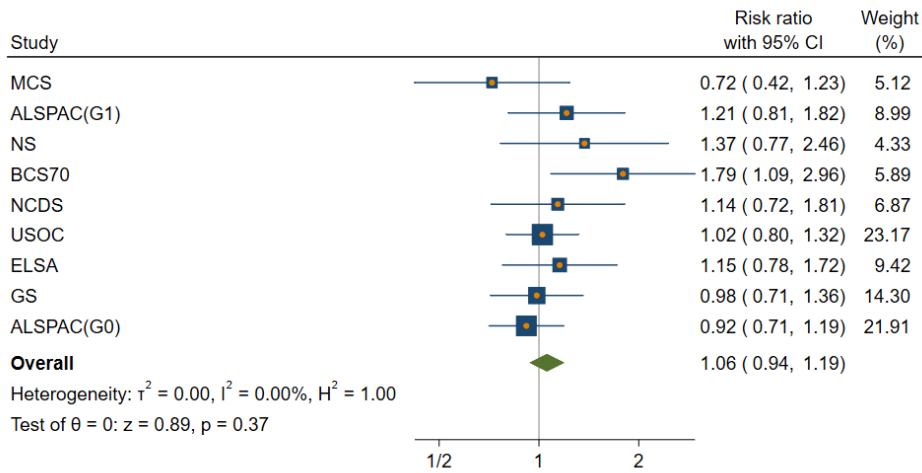

Random-effects REML model

Less time/Fewer days of physical exercise  
No longer employed vs. Stable employed

basic adjustment

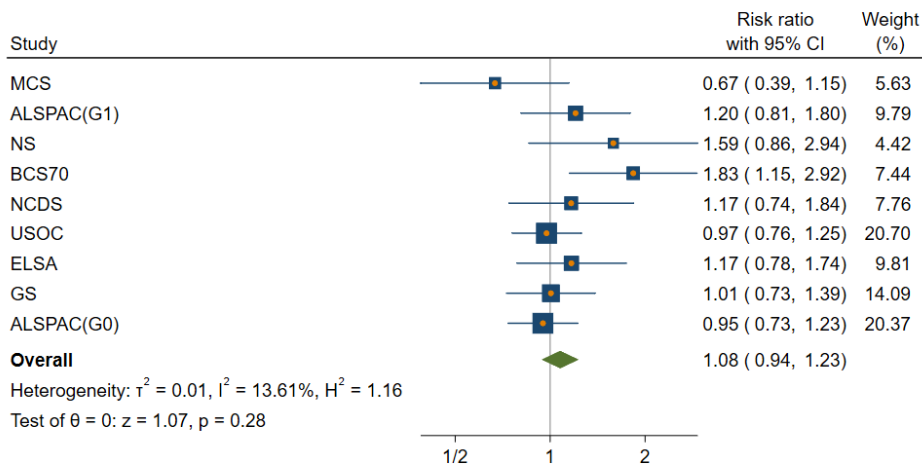

Random-effects REML model

Less time/Fewer days of physical exercise  
No longer employed vs. Stable employed

full adjustment

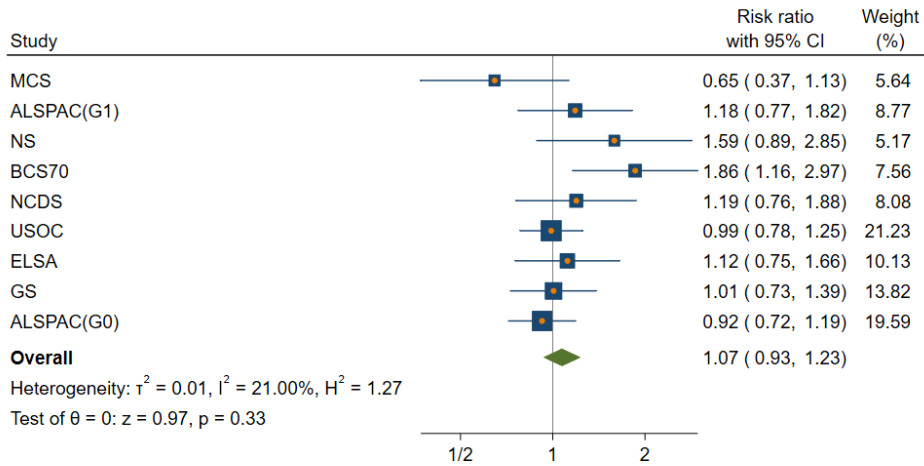

Random-effects REML model

Less time/Fewer days of physical exercise  
Stable unemployed vs. Stable employed

unadjusted

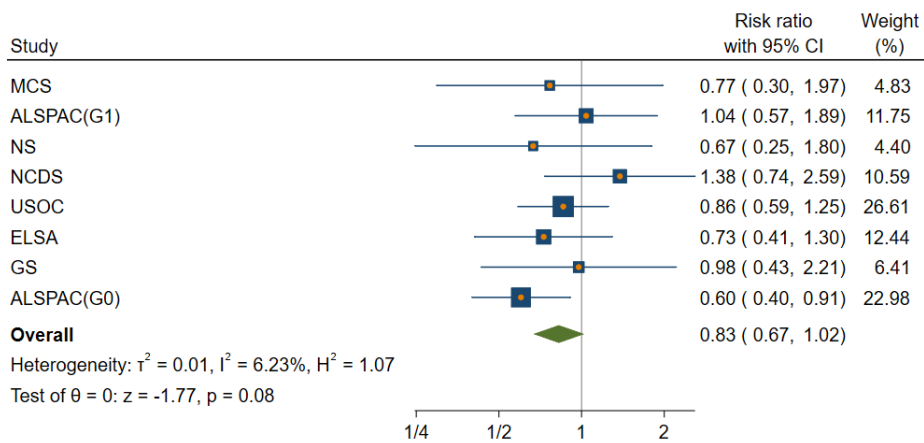

Random-effects REML model

Less time/Fewer days of physical exercise  
Stable unemployed vs. Stable employed

basic adjustment

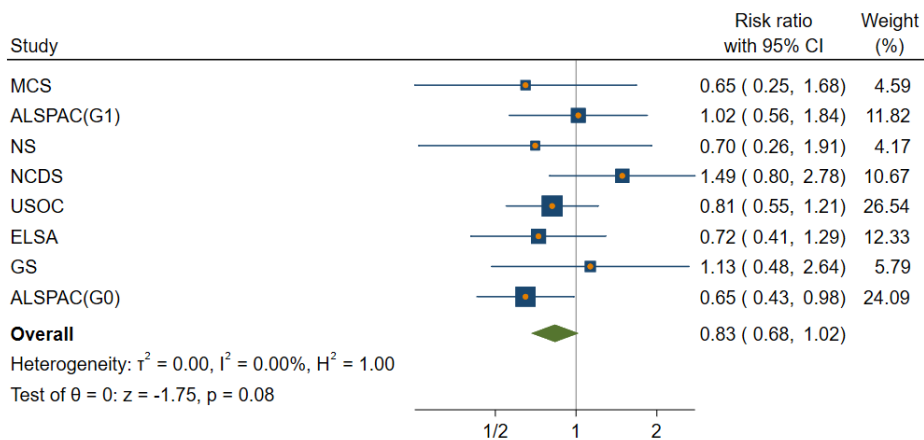

Random-effects REML model

Less time/Fewer days of physical exercise  
Stable unemployed vs. Stable employed

full adjustment

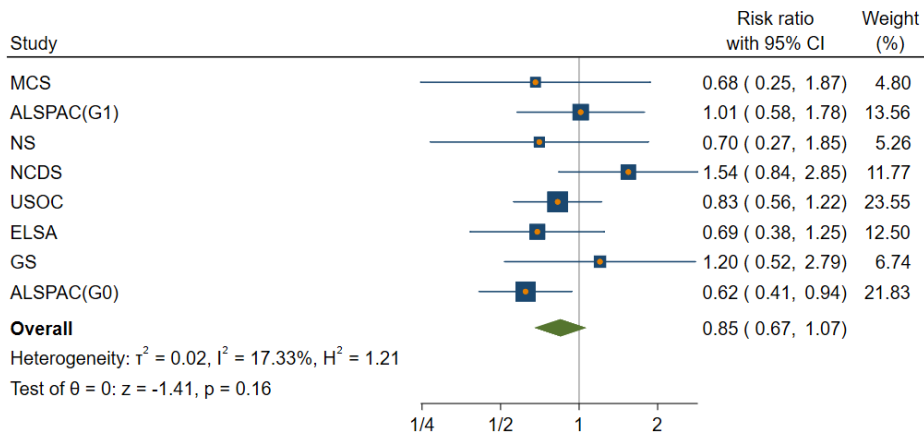

Random-effects REML model

Less time/Fewer days of physical exercise  
Became employed vs. Stable employed

unadjusted

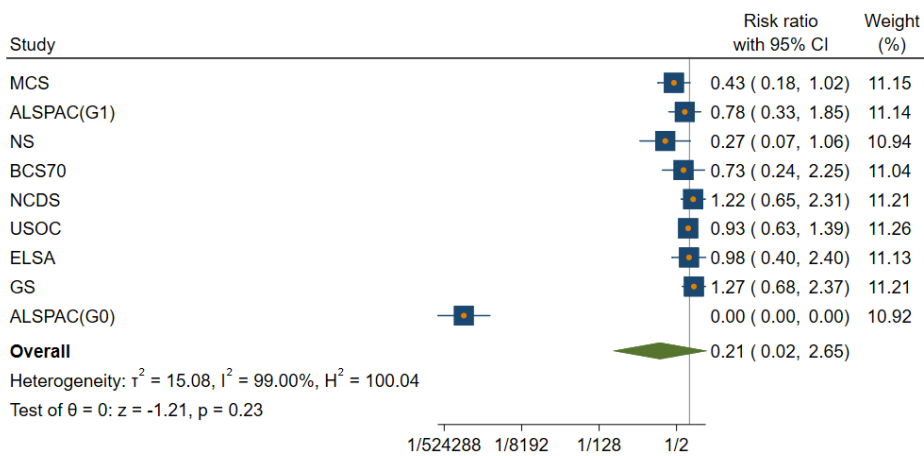

Random-effects REML model

Less time/Fewer days of physical exercise  
Became employed vs. Stable employed

basic adjustment

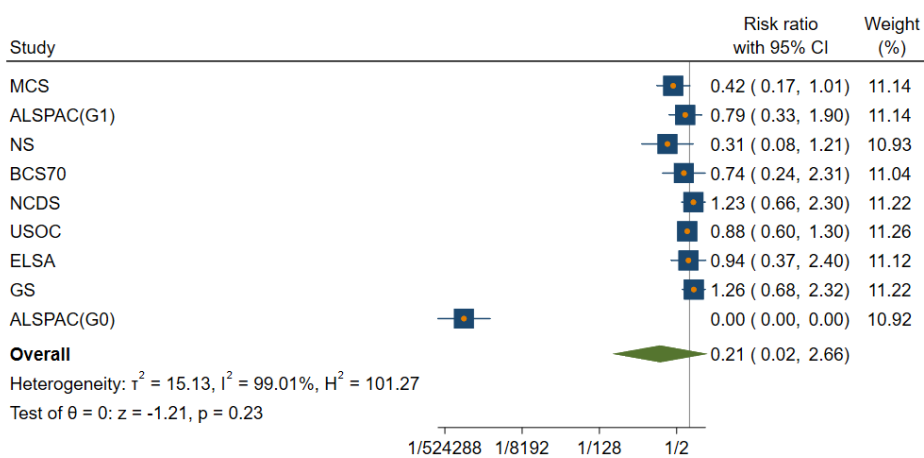

Random-effects REML model

Less time/Fewer days of physical exercise  
Became employed vs. Stable employed

full adjustment

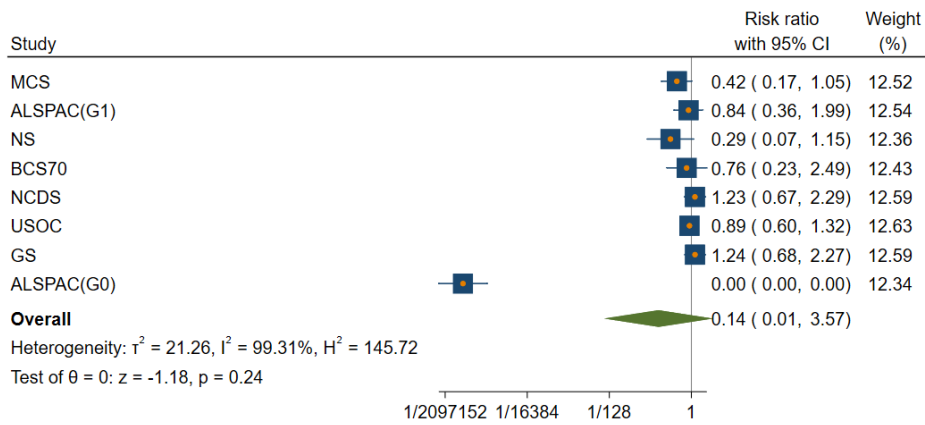

Random-effects REML model

Less time/Fewer days of physical exercise  
Stable non-employed vs. Stable employed

unadjusted

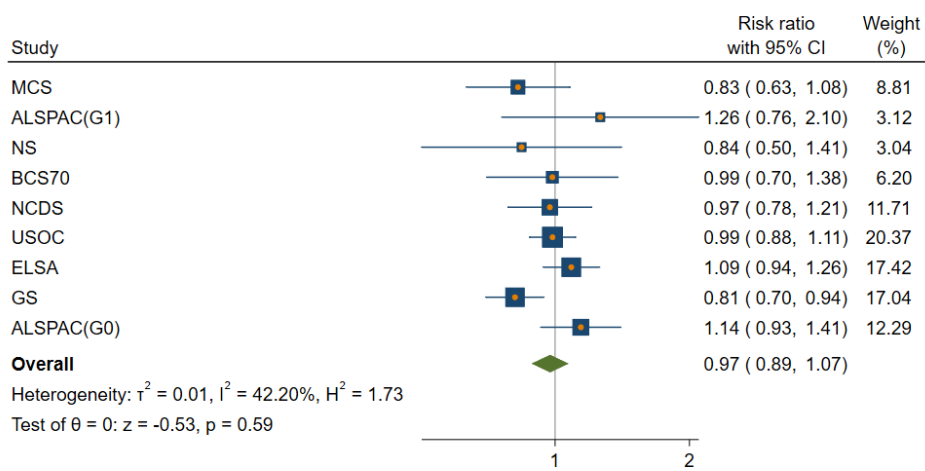

Random-effects REML model

Less time/Fewer days of physical exercise  
Stable non-employed vs. Stable employed

basic adjustment

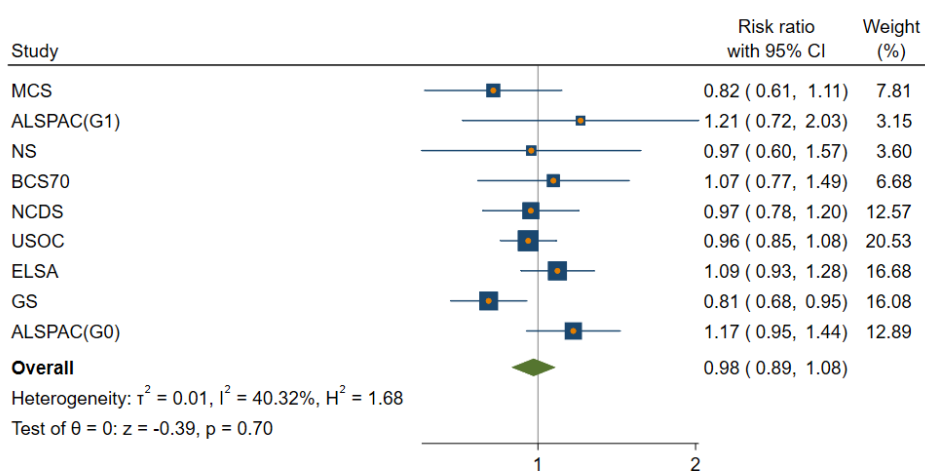

Random-effects REML model

Less time/Fewer days of physical exercise  
Stable non-employed vs. Stable employed

full adjustment

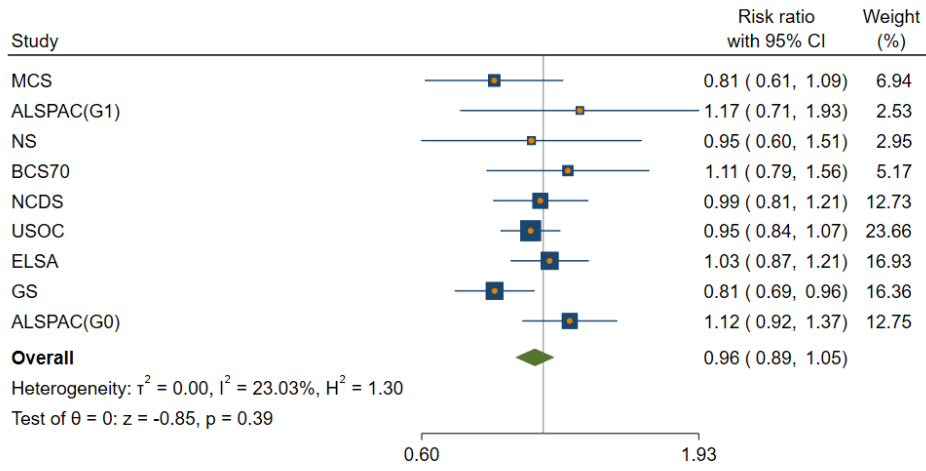

Random-effects REML model

## Figure set 6: More time/days of physical exercise

Commented [MJ2]:

More time/days of physical exercise  
Furloughed vs. Stable employed

unadjusted

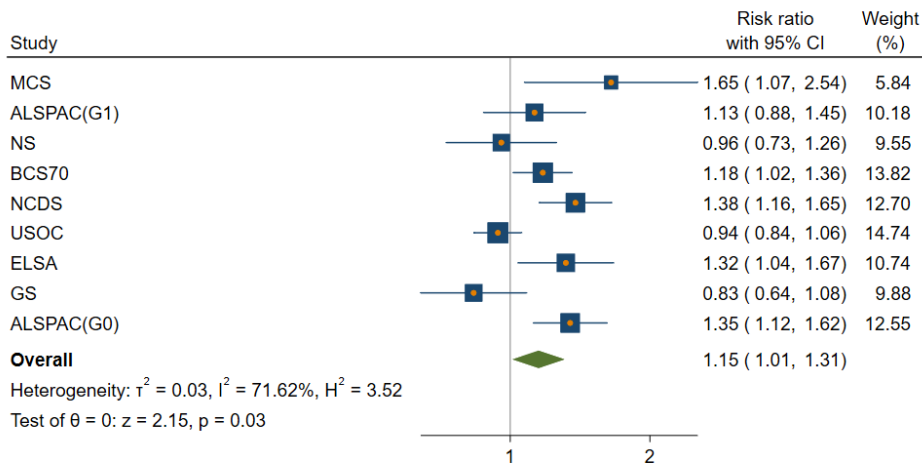

Random-effects REML model

More time/days of physical exercise  
Furloughed vs. Stable employed

basic adjustment

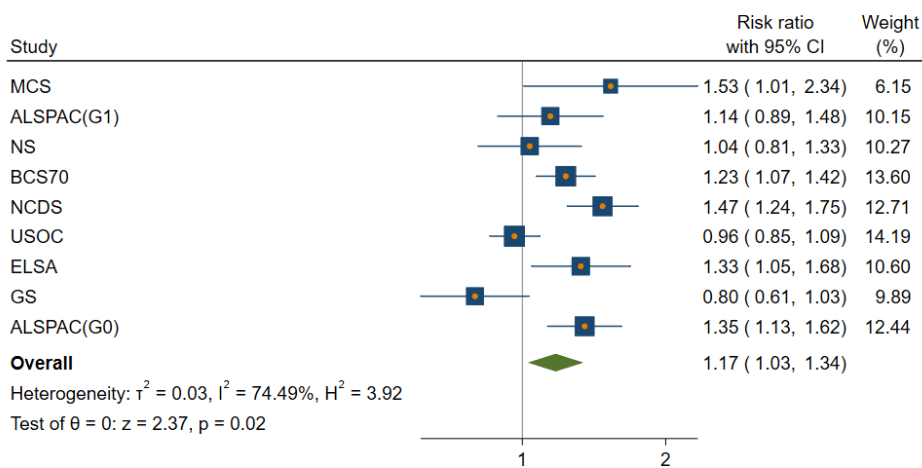

Random-effects REML model



More time/days of physical exercise  
Furloughed vs. Stable employed

full adjustment

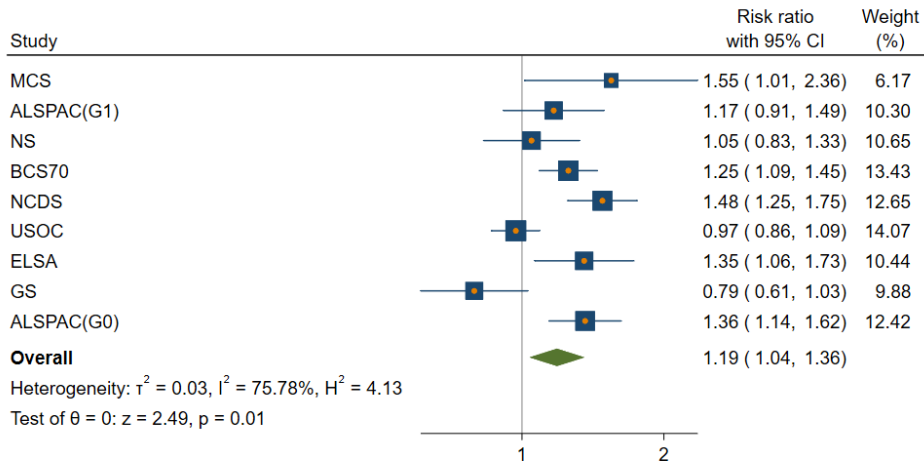

Random-effects REML model

More time/days of physical exercise  
No longer employed vs. Stable employed

unadjusted

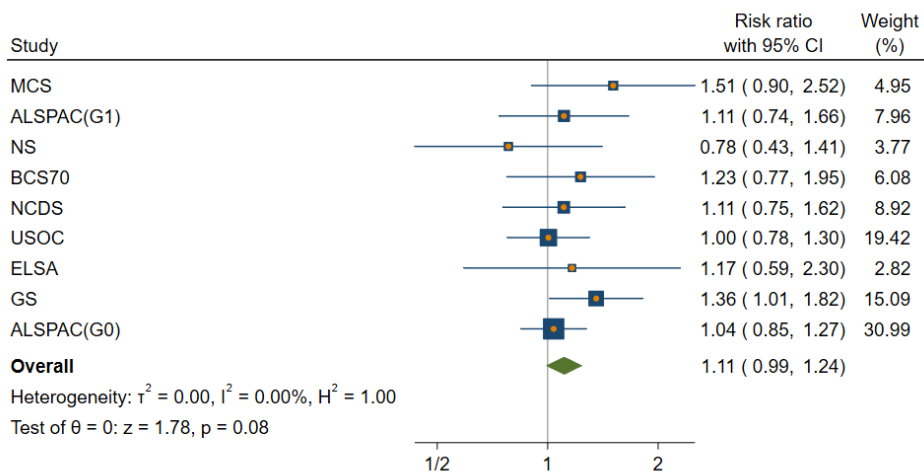

Random-effects REML model

More time/days of physical exercise  
No longer employed vs. Stable employed

basic adjustment

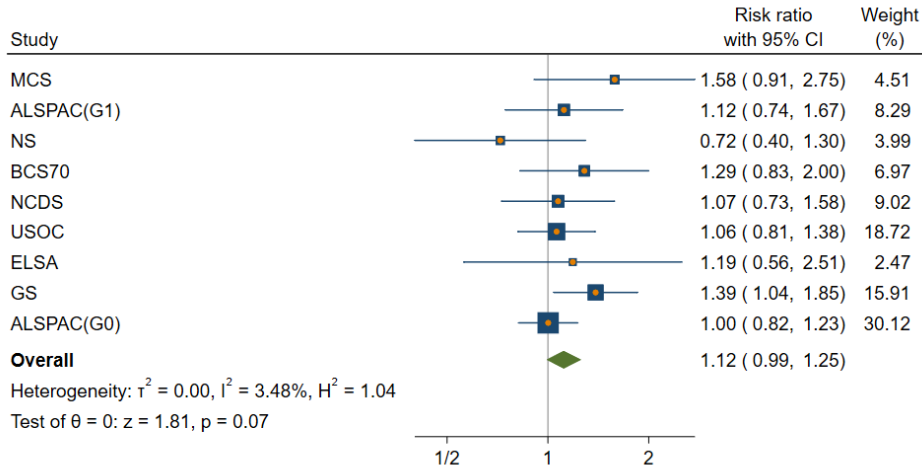

Random-effects REML model

More time/days of physical exercise  
No longer employed vs. Stable employed

full adjustment

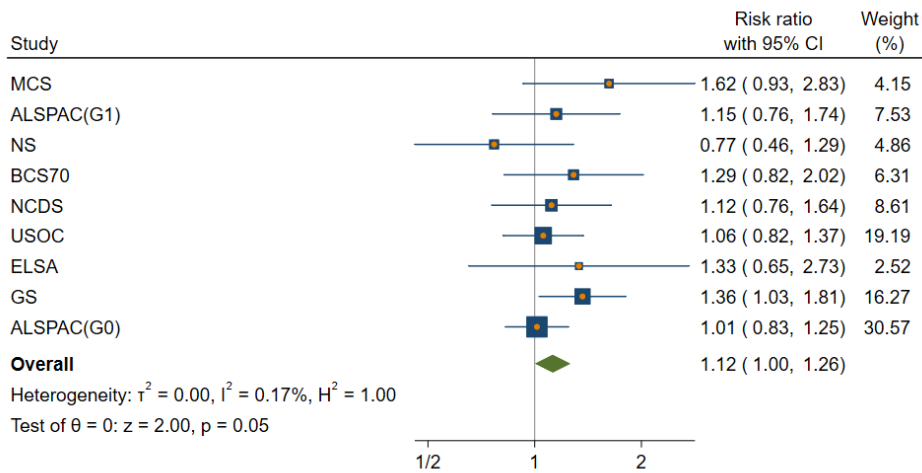

Random-effects REML model

More time/days of physical exercise  
Stable unemployed vs. Stable employed

unadjusted

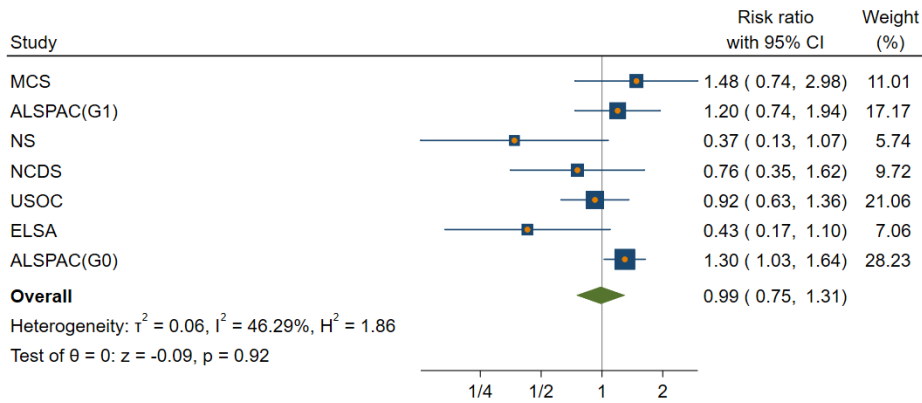

Random-effects REML model

More time/days of physical exercise  
Stable unemployed vs. Stable employed

basic adjustment

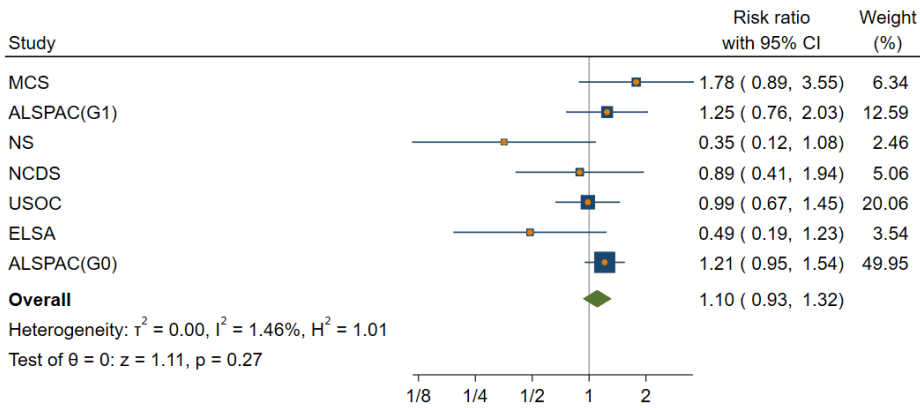

Random-effects REML model

More time/days of physical exercise  
Stable unemployed vs. Stable employed

full adjustment

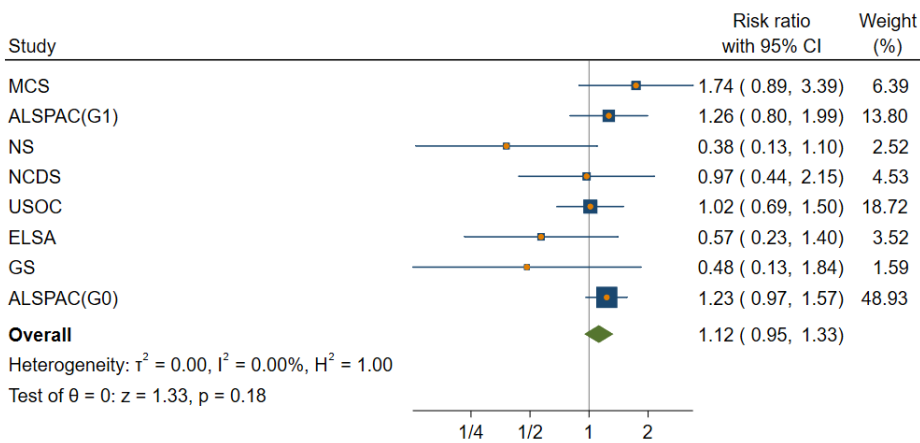

Random-effects REML model

More time/days of physical exercise  
Became employed vs. Stable employed

unadjusted

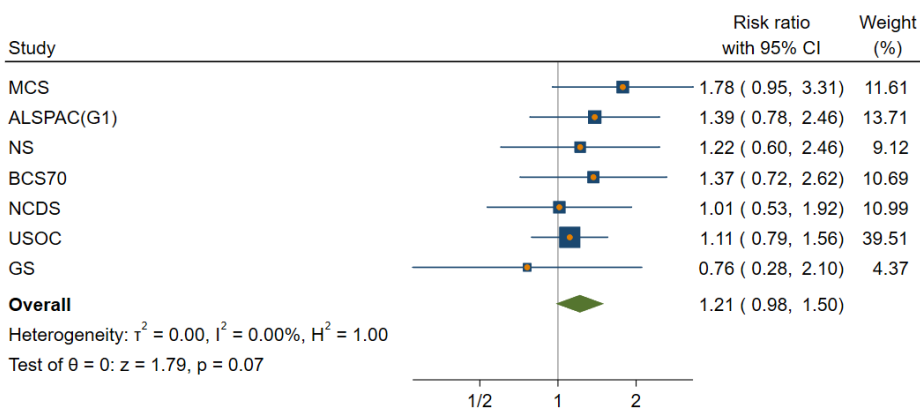

Random-effects REML model

More time/days of physical exercise  
Became employed vs. Stable employed

basic adjustment

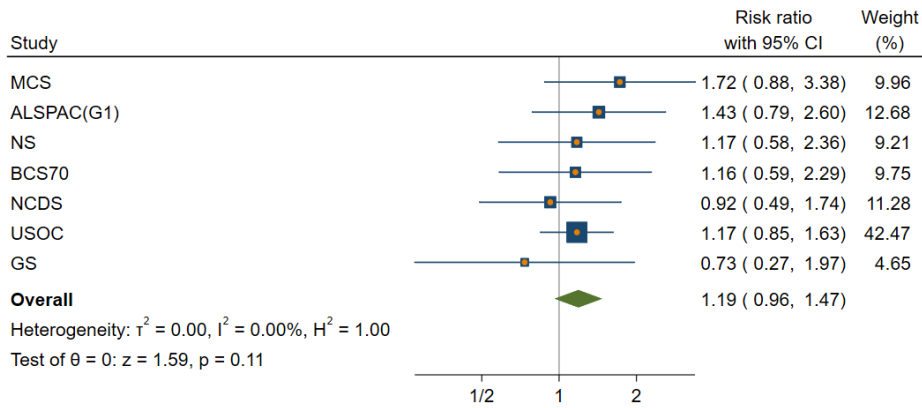

Random-effects REML model

More time/days of physical exercise  
Became employed vs. Stable employed

full adjustment

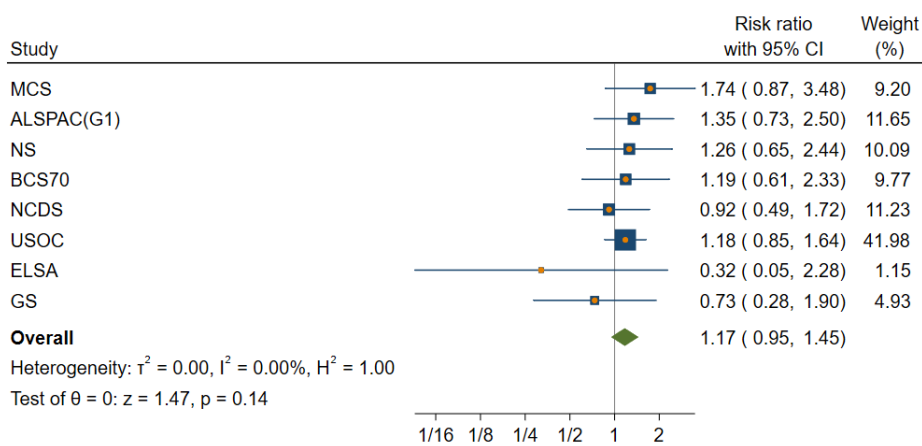

Random-effects REML model

More time/days of physical exercise  
Stable non-employed vs. Stable employed

unadjusted

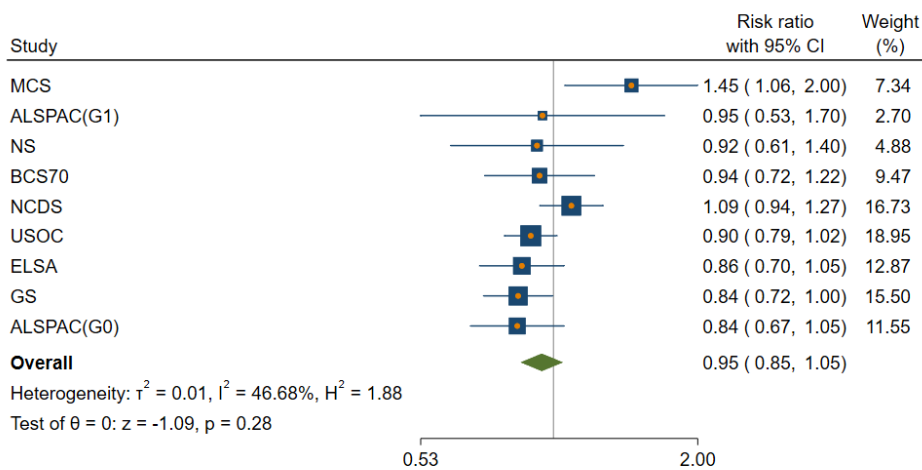

Random-effects REML model

More time/days of physical exercise  
Stable non-employed vs. Stable employed

basic adjustment

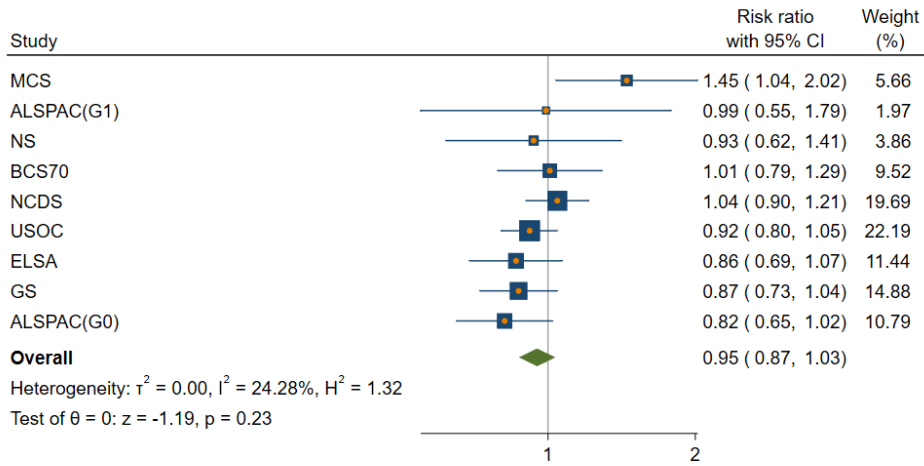

Random-effects REML model

More time/days of physical exercise  
Stable non-employed vs. Stable employed

full adjustment

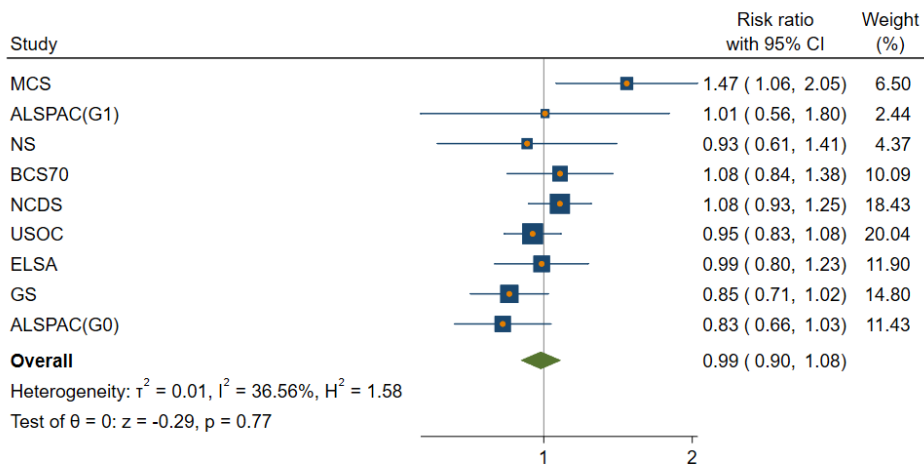

Random-effects REML model

## Figure set 7: Sleeps outside 'Normal Range' (i.e. <6 or 9+ hours)

Sleeps outside 'Normal Range' (i.e. <6 or 9+ hours)  
Furloughed vs. Stable employed

unadjusted

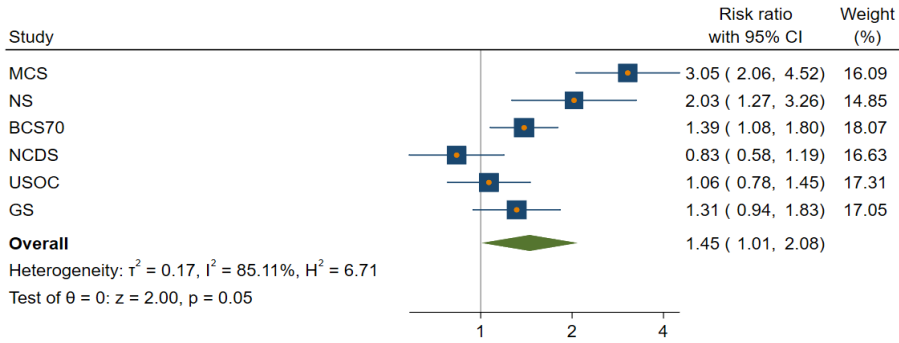

Random-effects REML model

Sleeps outside 'Normal Range' (i.e. <6 or 9+ hours)  
Furloughed vs. Stable employed

basic adjustment

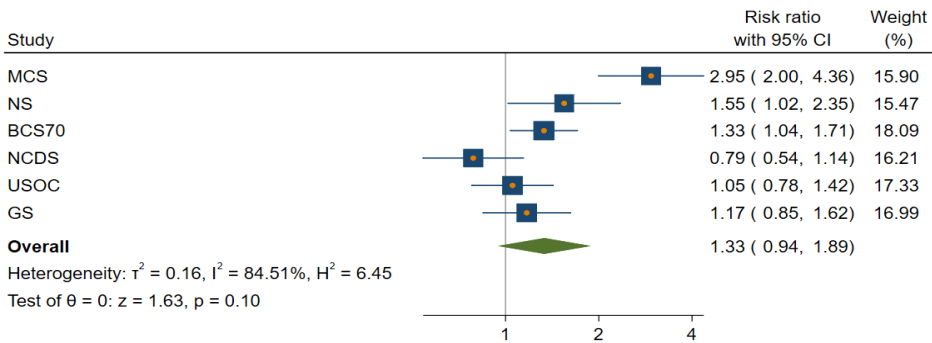

Random-effects REML model

Sleeps outside 'Normal Range' (i.e. <6 or 9+ hours)  
Furloughed vs. Stable employed

full adjustment

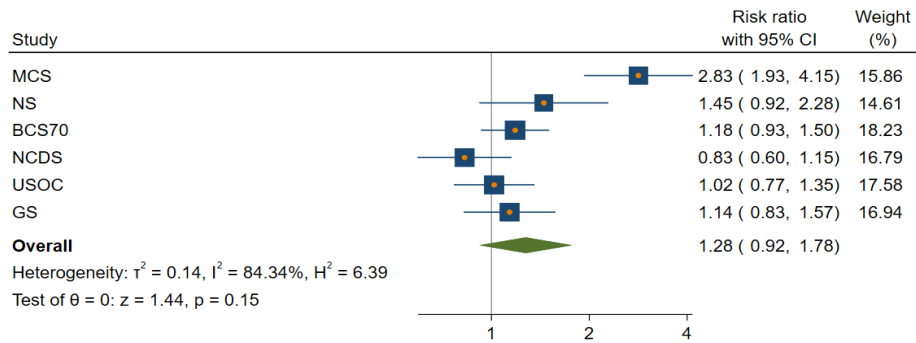

Random-effects REML model

Sleeps outside 'Normal Range' (i.e. <6 or 9+ hours)  
No longer employed vs. Stable employed

unadjusted

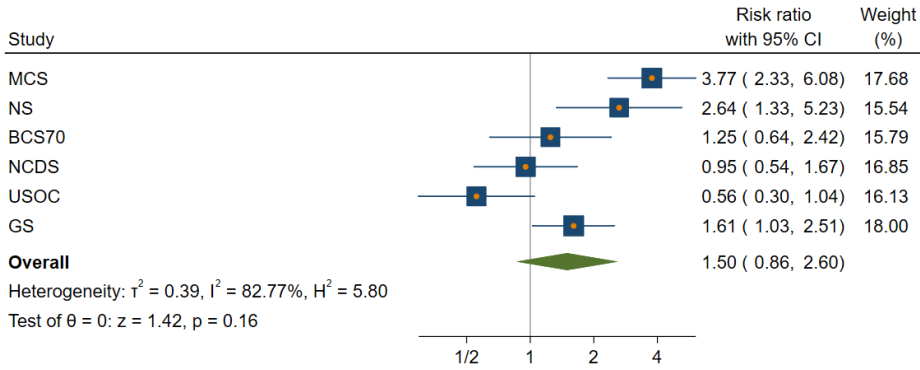

Random-effects REML model

Sleeps outside 'Normal Range' (i.e. <6 or 9+ hours)  
No longer employed vs. Stable employed

basic adjustment

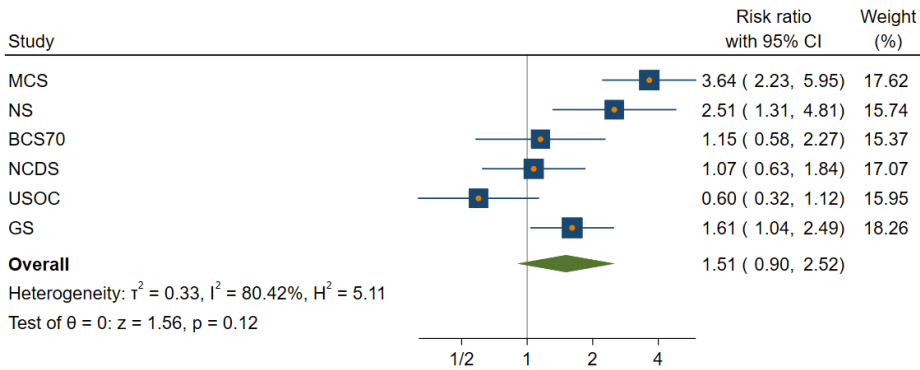

Random-effects REML model

Sleeps outside 'Normal Range' (i.e. <6 or 9+ hours)  
No longer employed vs. Stable employed

full adjustment

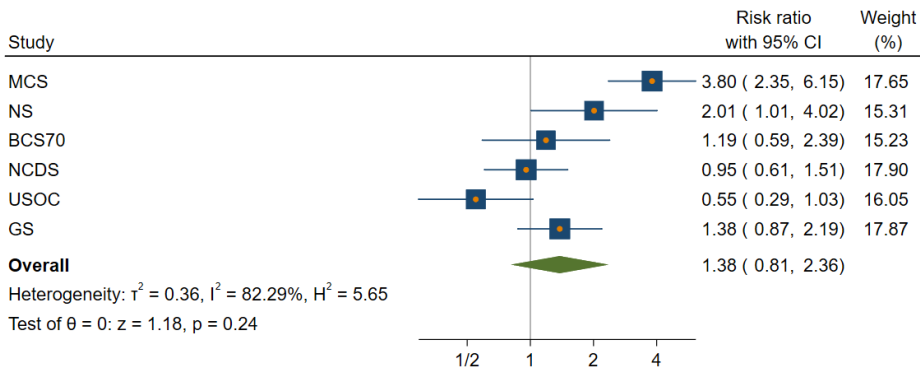

Random-effects REML model

Sleeps outside 'Normal Range' (i.e. <6 or 9+ hours)  
Stable unemployed vs. Stable employed

unadjusted

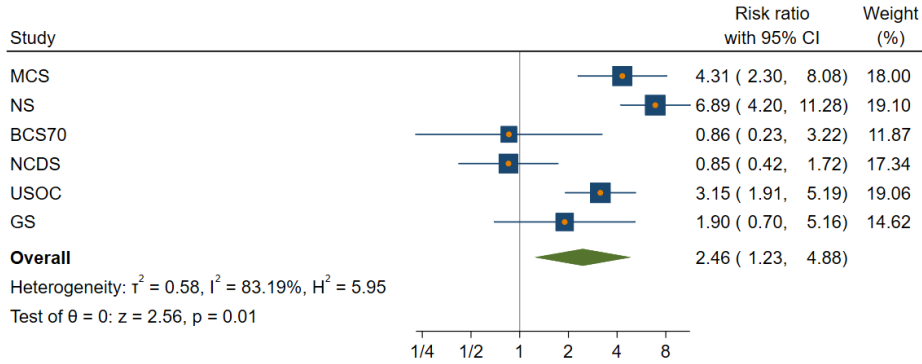

Random-effects REML model

Sleeps outside 'Normal Range' (i.e. <6 or 9+ hours)  
Stable unemployed vs. Stable employed

basic adjustment

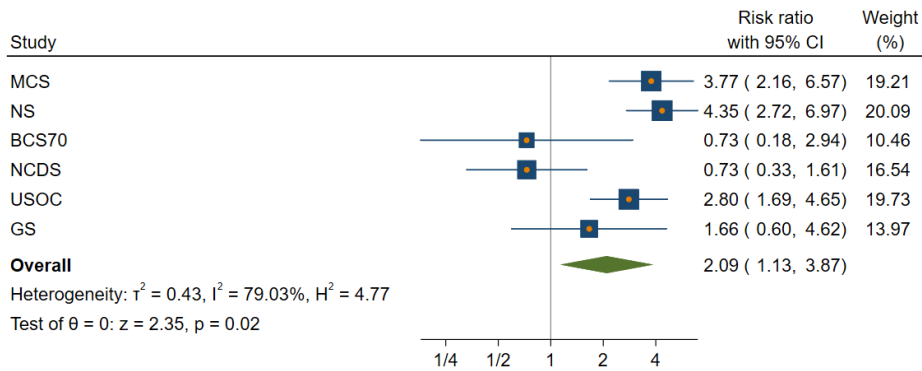

Random-effects REML model

Sleeps outside 'Normal Range' (i.e. <6 or 9+ hours)  
Stable unemployed vs. Stable employed

full adjustment

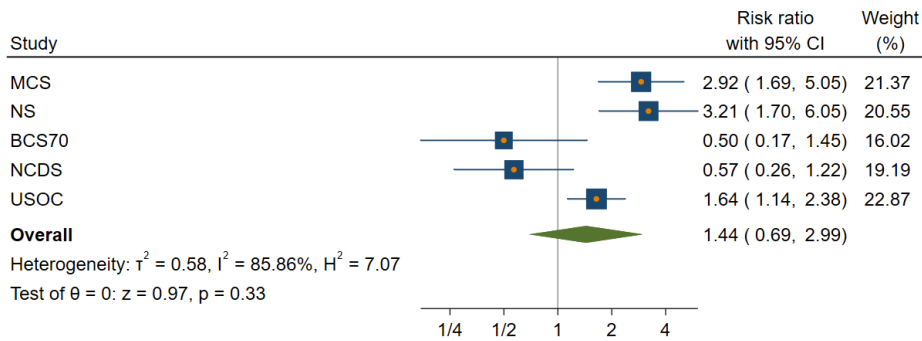

Random-effects REML model



Sleeps outside 'Normal Range' (i.e. <6 or 9+ hours)  
Became employed vs. Stable employed

unadjusted

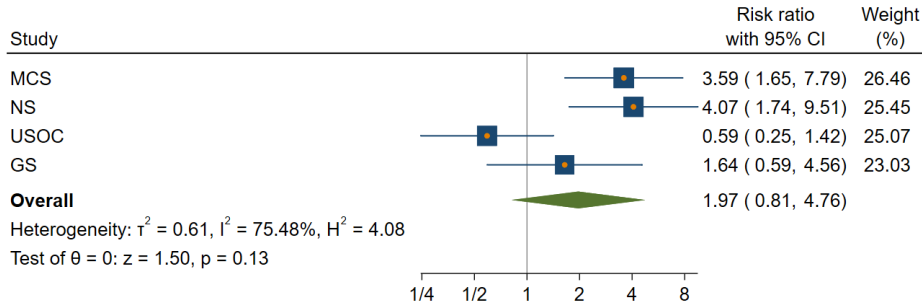

Random-effects REML model

Sleeps outside 'Normal Range' (i.e. <6 or 9+ hours)  
Became employed vs. Stable employed

basic adjustment

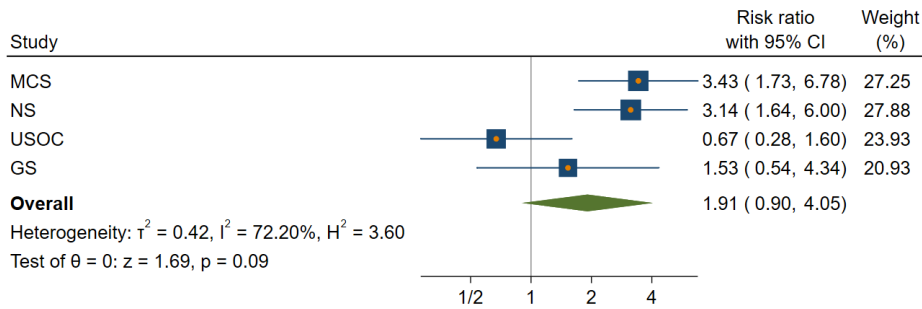

Random-effects REML model

Sleeps outside 'Normal Range' (i.e. <6 or 9+ hours)  
Became employed vs. Stable employed

full adjustment

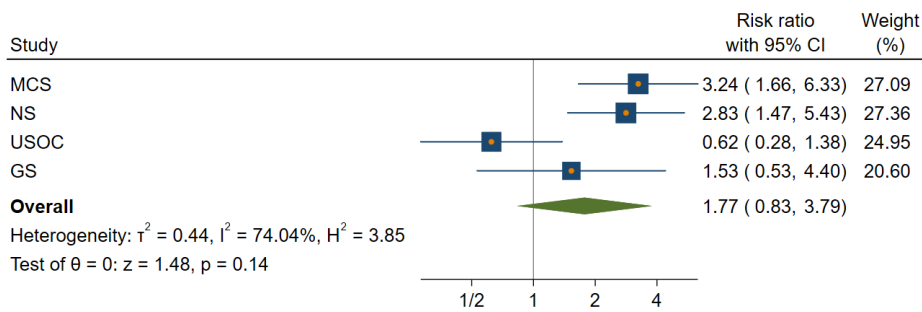

Random-effects REML model

Sleeps outside 'Normal Range' (i.e. <6 or 9+ hours)  
Stable non-employed vs. Stable employed

unadjusted

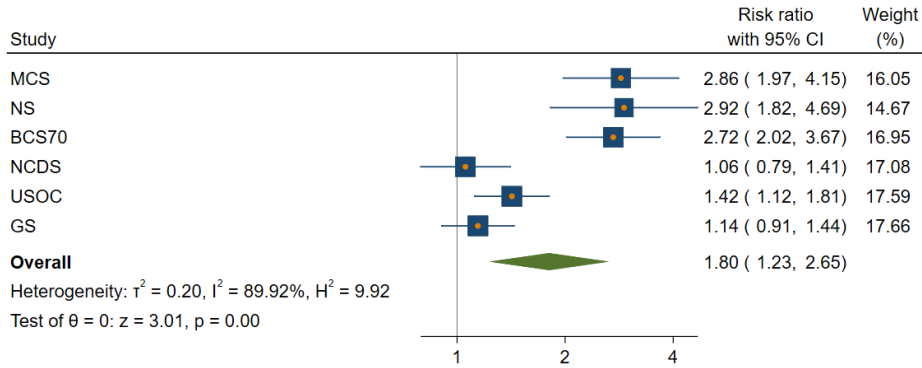

Random-effects REML model

Sleeps outside 'Normal Range' (i.e. <6 or 9+ hours)  
Stable non-employed vs. Stable employed

basic adjustment

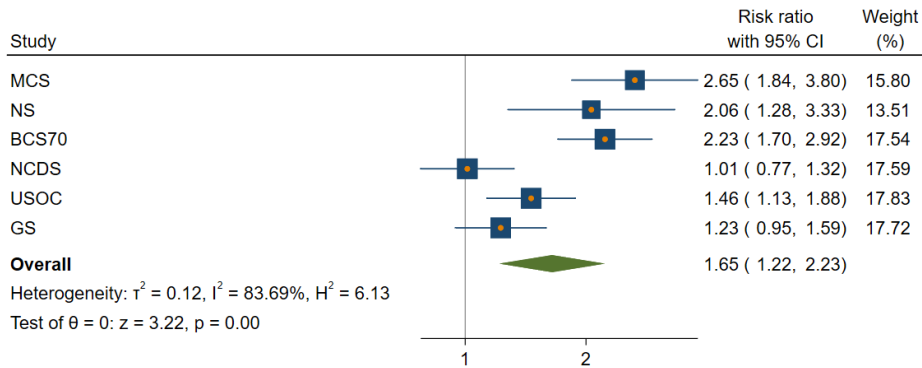

Random-effects REML model

Sleeps outside 'Normal Range' (i.e. <6 or 9+ hours)  
Stable non-employed vs. Stable employed

full adjustment

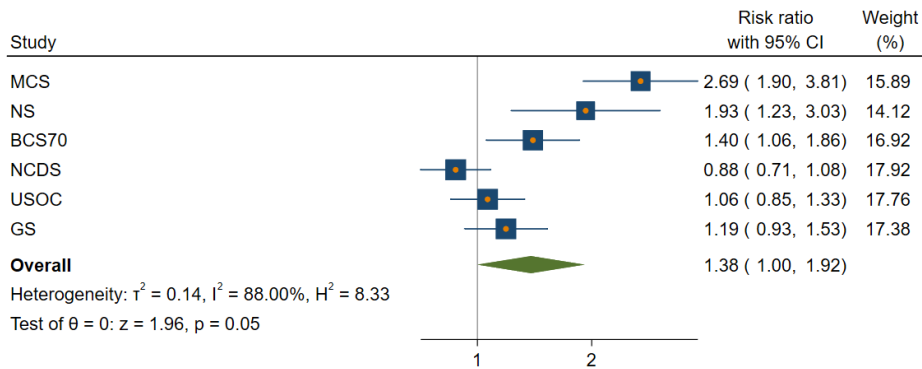

Random-effects REML model

**Figure set 8: Sleeps less than before**

Commented [MJ3]:

Sleep less than before  
Furloughed vs. Stable employed

unadjusted

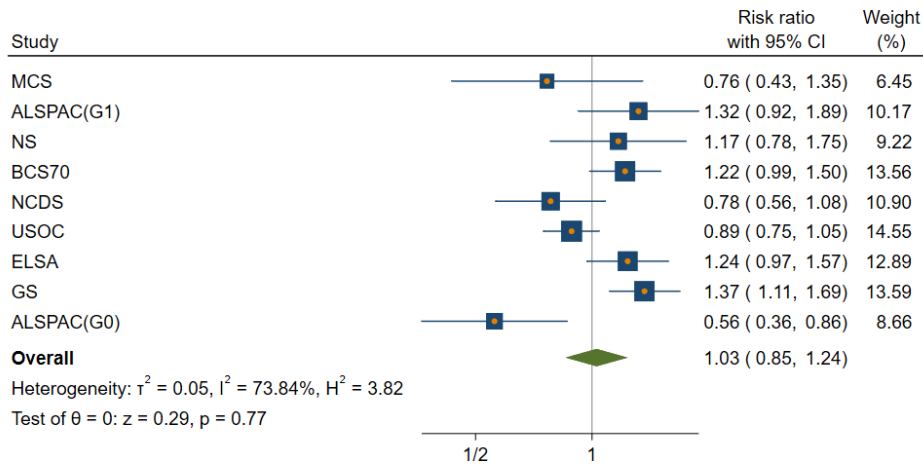

Random-effects REML model

Sleep less than before  
Furloughed vs. Stable employed

basic adjustment

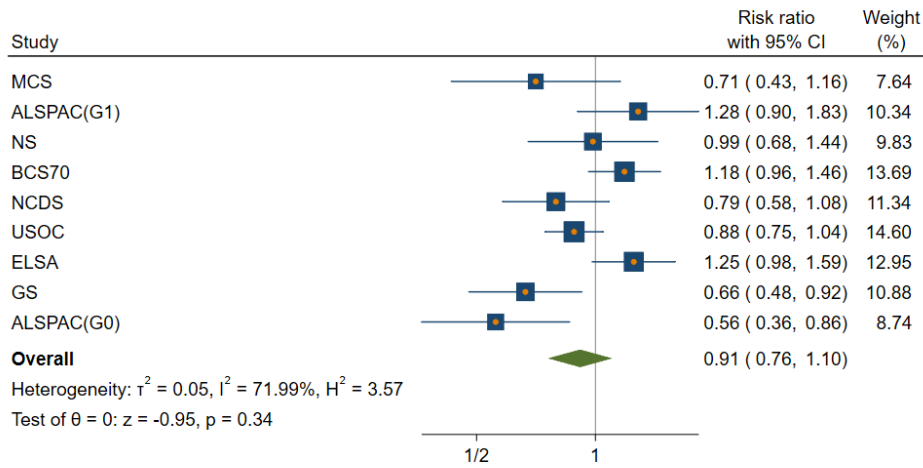

Random-effects REML model

Sleep less than before  
Furloughed vs. Stable employed  
full adjustment

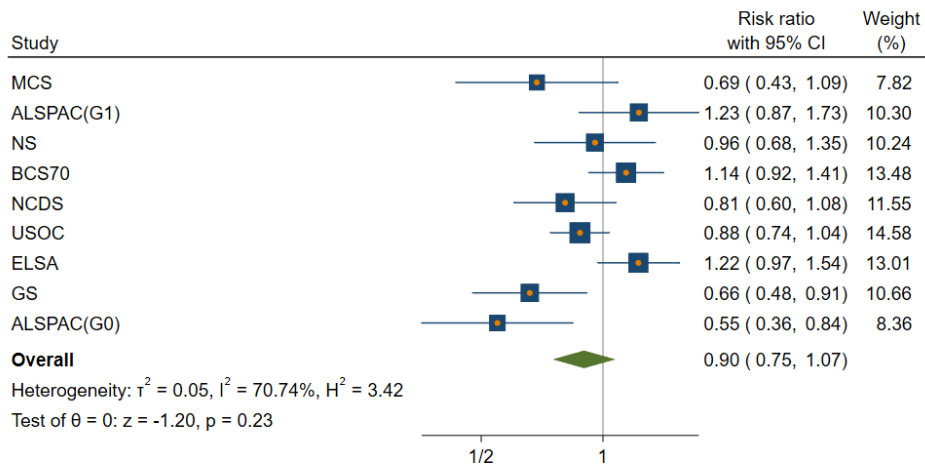

Random-effects REML model

Sleep less than before  
No longer employed vs. Stable employed  
unadjusted

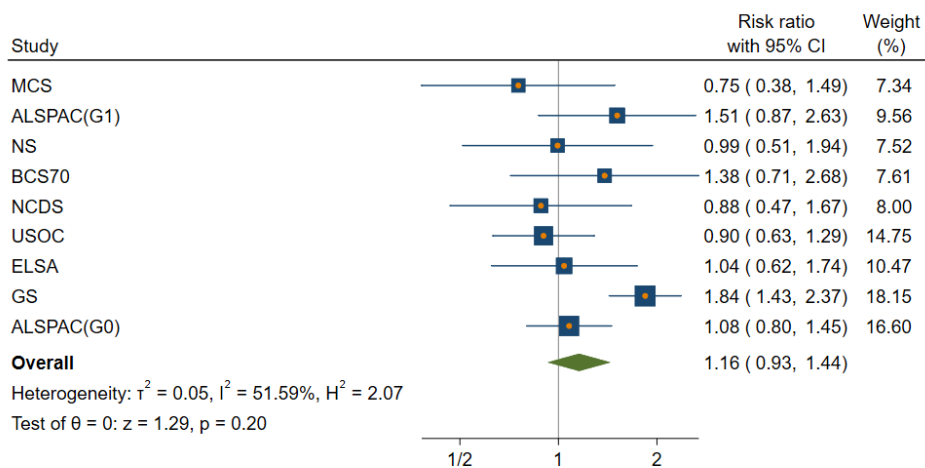

Random-effects REML model

Sleep less than before  
No longer employed vs. Stable employed  
basic adjustment

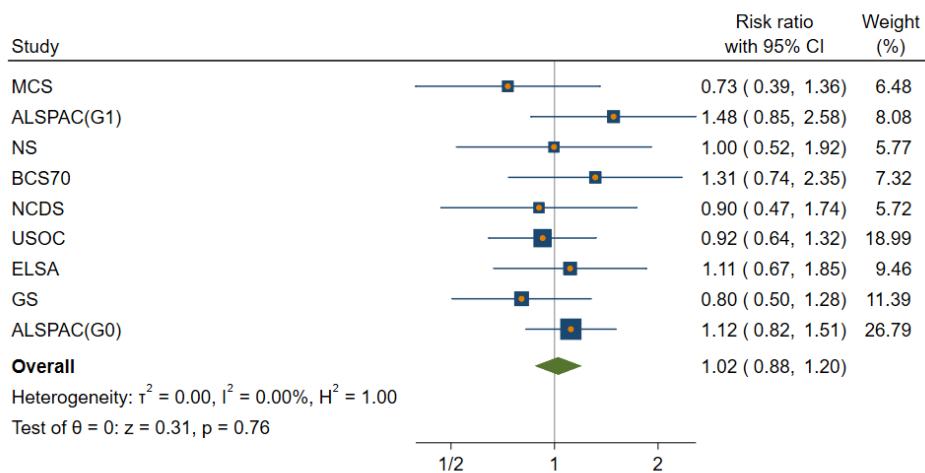

Random-effects REML model

Sleep less than before  
No longer employed vs. Stable employed  
full adjustment

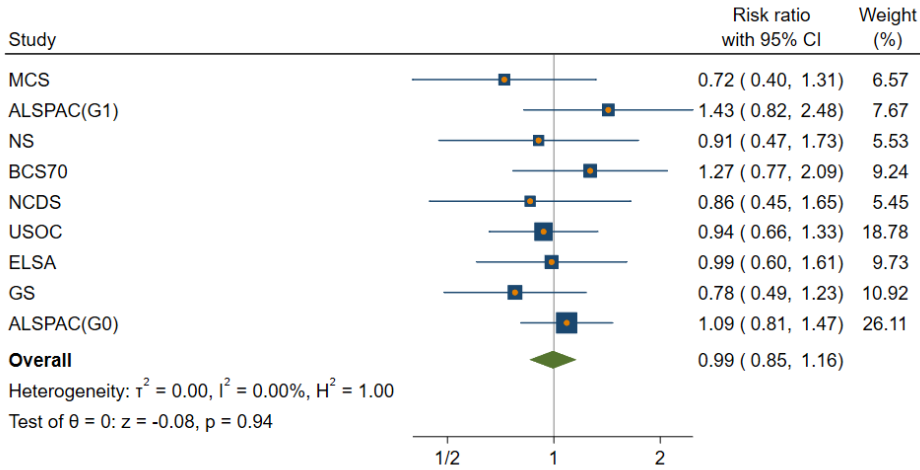

Random-effects REML model

Sleep less than before  
Stable unemployed vs. Stable employed  
unadjusted

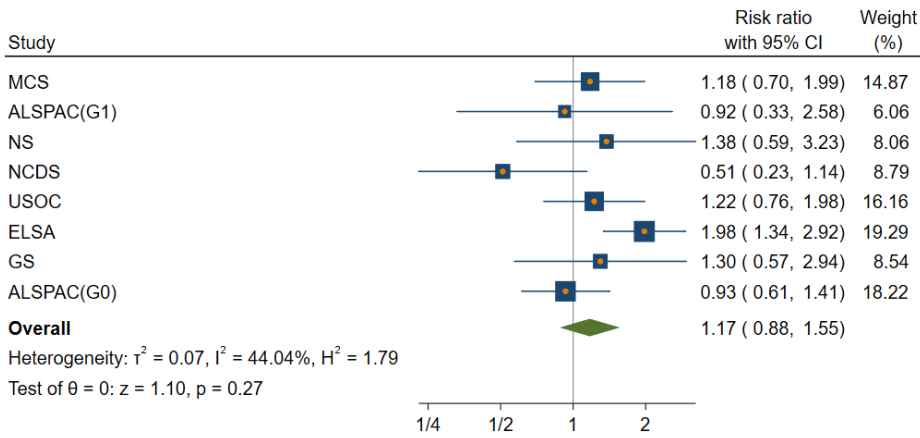

Random-effects REML model

Sleep less than before  
Stable unemployed vs. Stable employed  
basic adjustment

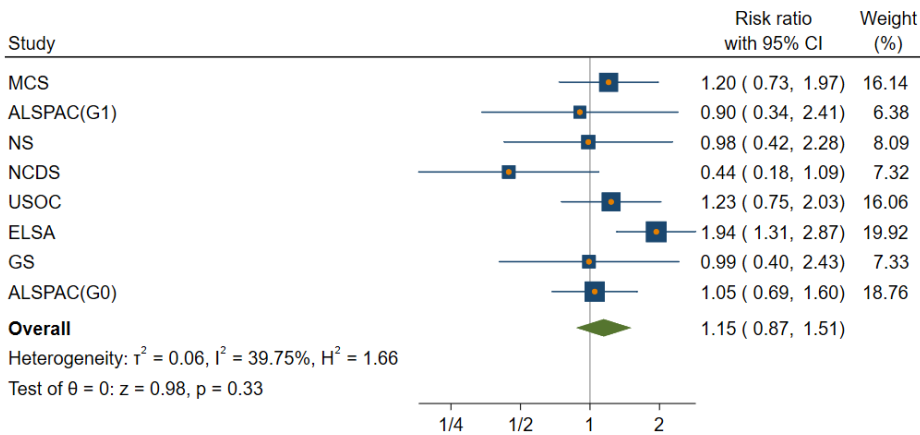

Random-effects REML model

Sleep less than before  
Stable unemployed vs. Stable employed

full adjustment

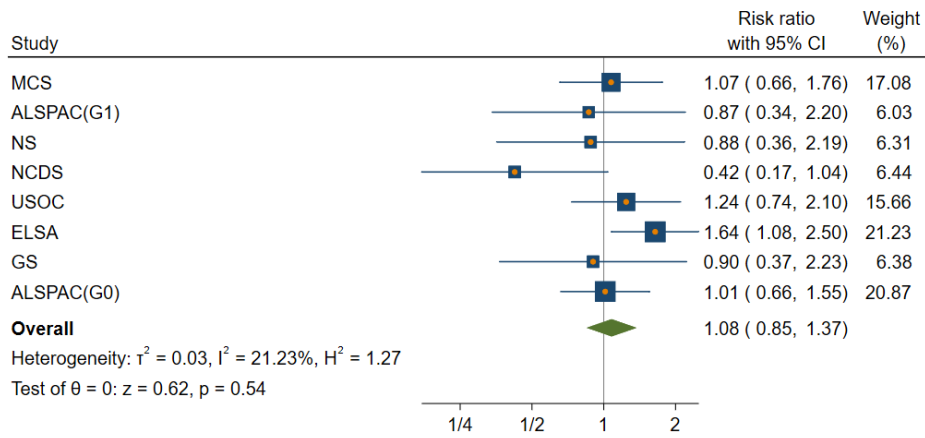

Random-effects REML model

Sleep less than before  
Became employed vs. Stable employed

unadjusted

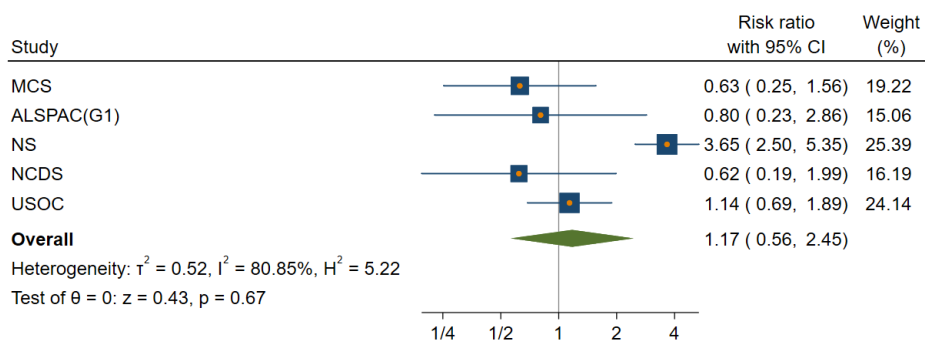

Random-effects REML model

Sleep less than before  
Became employed vs. Stable employed

basic adjustment

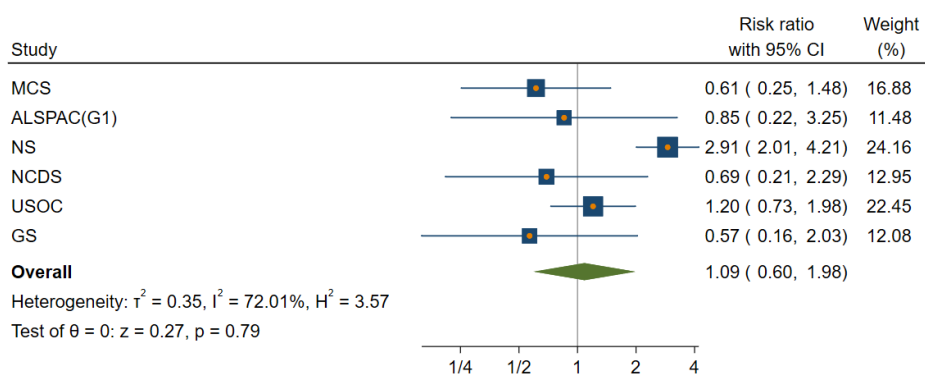

Random-effects REML model

Sleep less than before  
Became employed vs. Stable employed

full adjustment

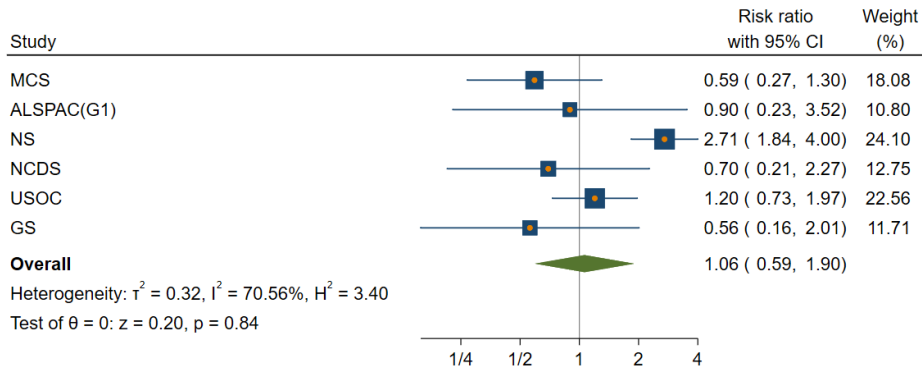

Random-effects REML model

Sleep less than before  
Stable non-employed vs. Stable employed

unadjusted

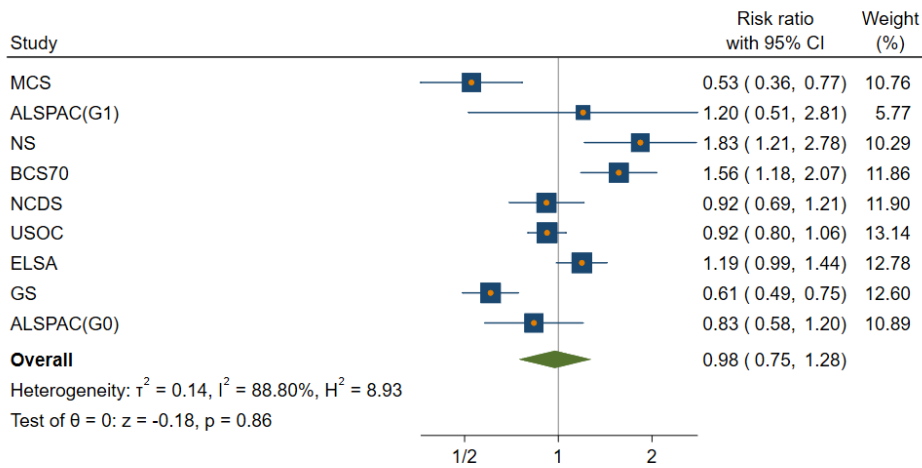

Random-effects REML model

Sleep less than before  
Stable non-employed vs. Stable employed

basic adjustment

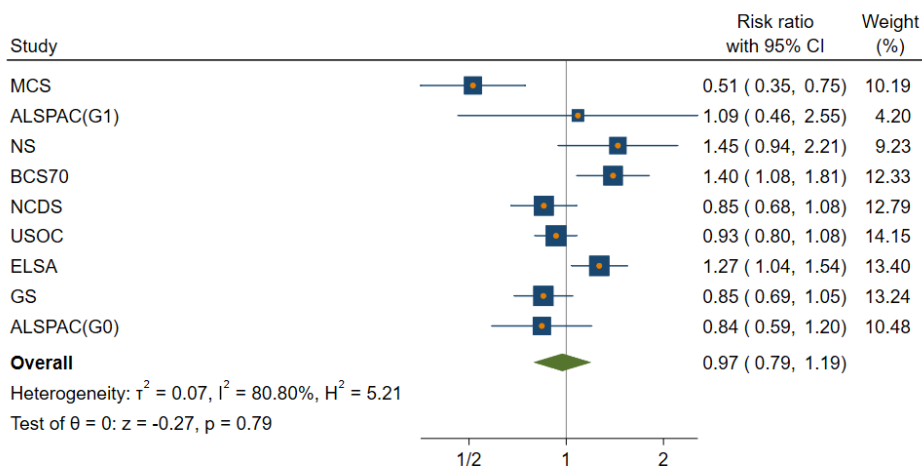

Random-effects REML model

Sleep less than before  
Stable non-employed vs. Stable employed

full adjustment

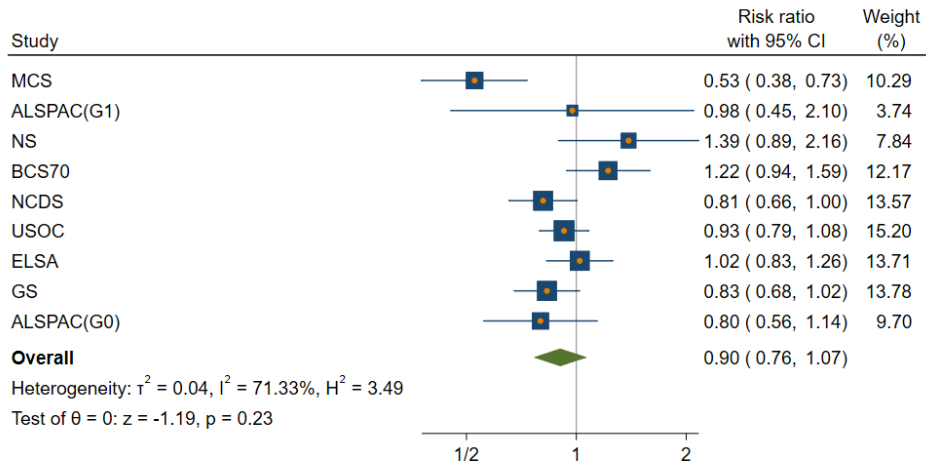

Random-effects REML model



**Figure set 9: Sleeps more than before**

Commented [MJ4]:

Sleep more than before  
Furloughed vs. Stable employed

unadjusted

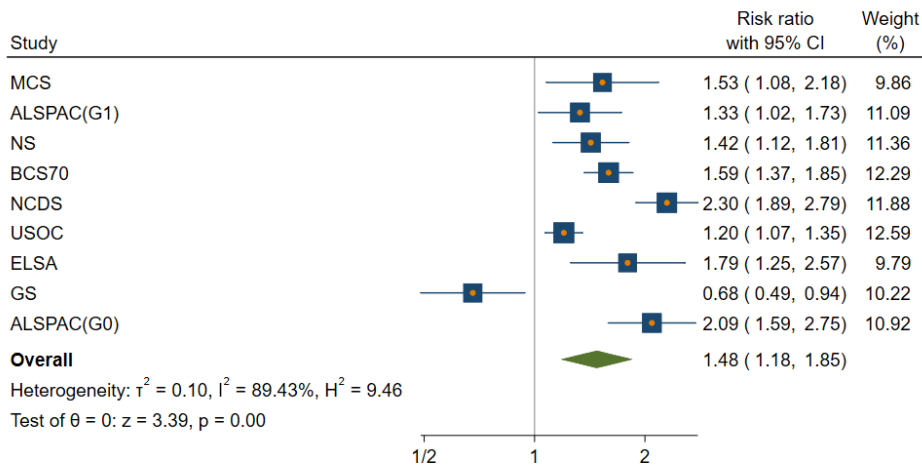

Random-effects REML model

Sleep more than before  
Furloughed vs. Stable employed

basic adjustment

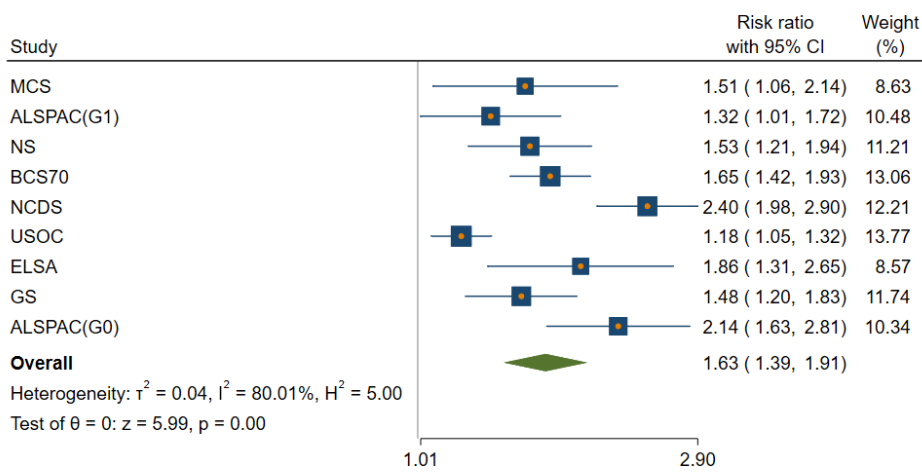

Random-effects REML model

Sleep more than before  
Furloughed vs. Stable employed  
full adjustment

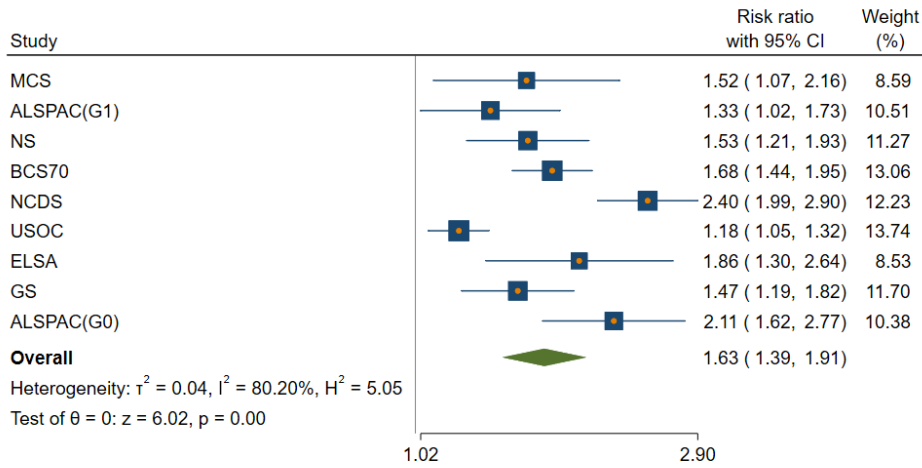

Random-effects REML model

Sleep more than before  
No longer employed vs. Stable employed  
unadjusted

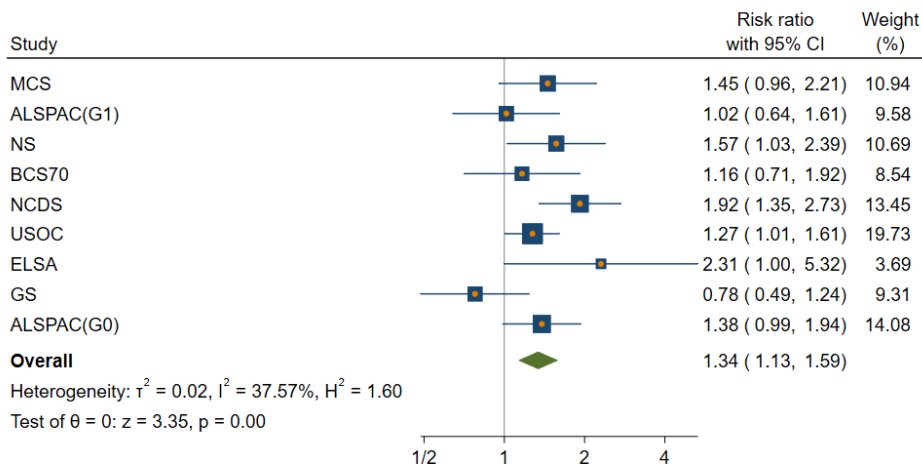

Random-effects REML model

Sleep more than before  
No longer employed vs. Stable employed  
basic adjustment

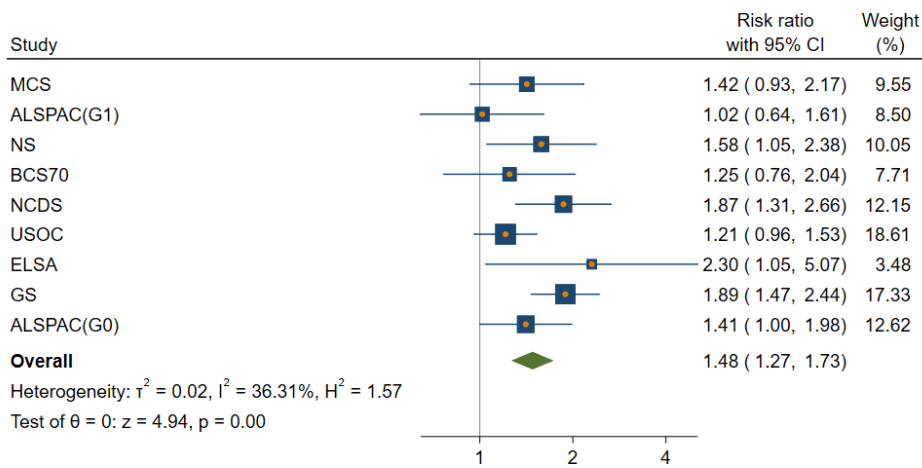

Random-effects REML model

Sleep more than before  
No longer employed vs. Stable employed

full adjustment

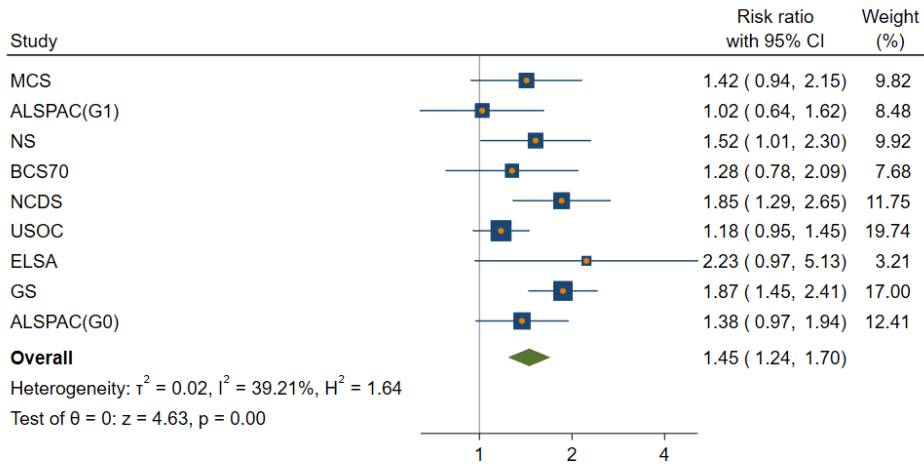

Random-effects REML model

Sleep more than before  
Stable unemployed vs. Stable employed

unadjusted

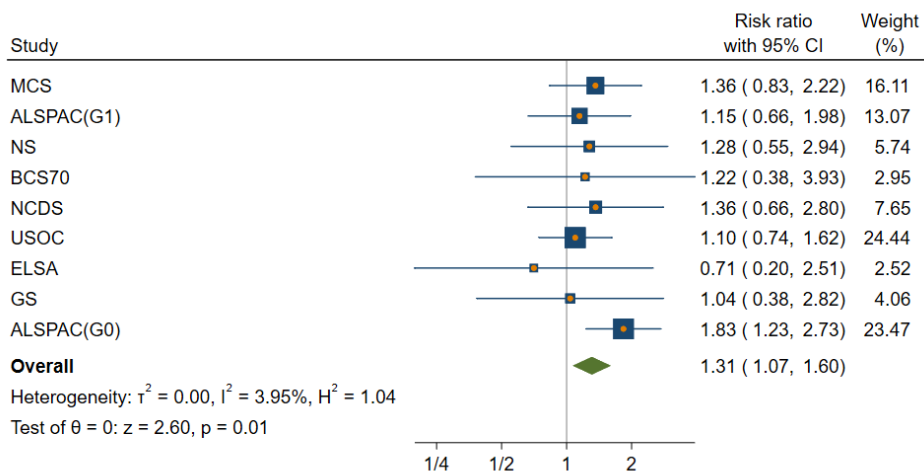

Random-effects REML model

Sleep more than before  
Stable unemployed vs. Stable employed

basic adjustment

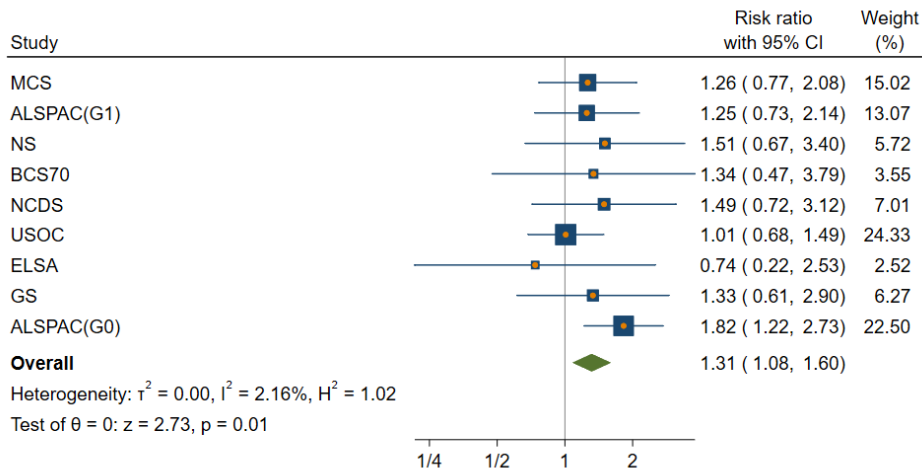

Random-effects ML model

Sleep more than before  
Stable unemployed vs. Stable employed

full adjustment

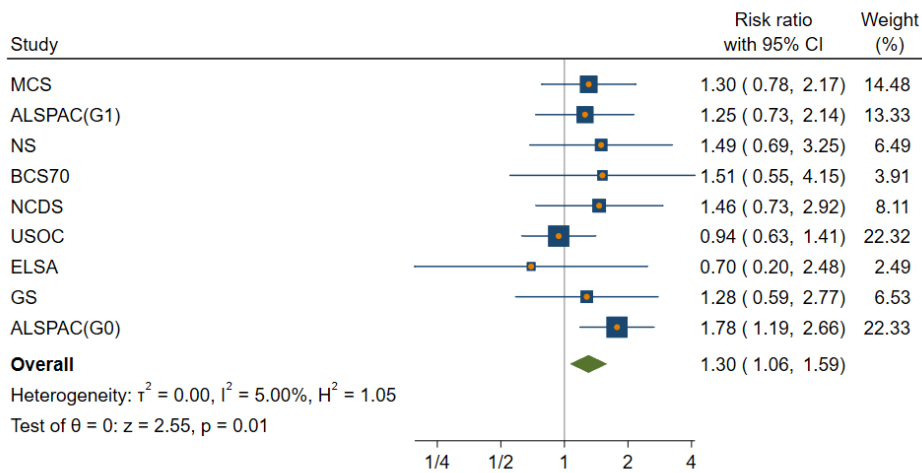

Random-effects ML model

Sleep more than before  
Became employed vs. Stable employed

unadjusted

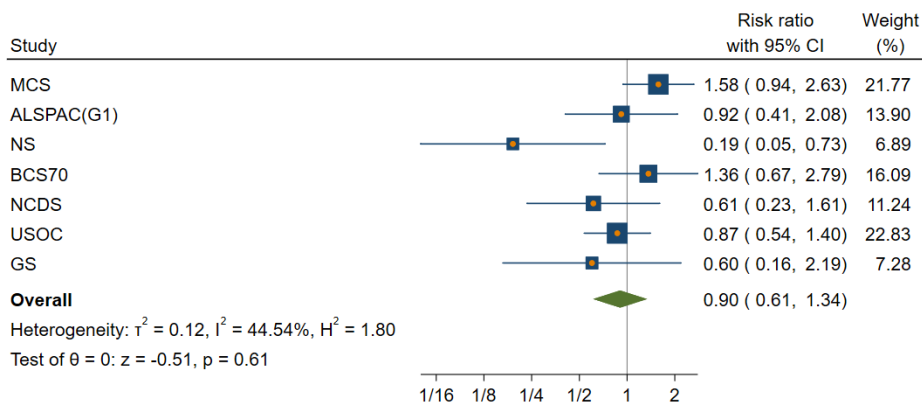

Random-effects REML model

Sleep more than before  
Became employed vs. Stable employed

basic adjustment

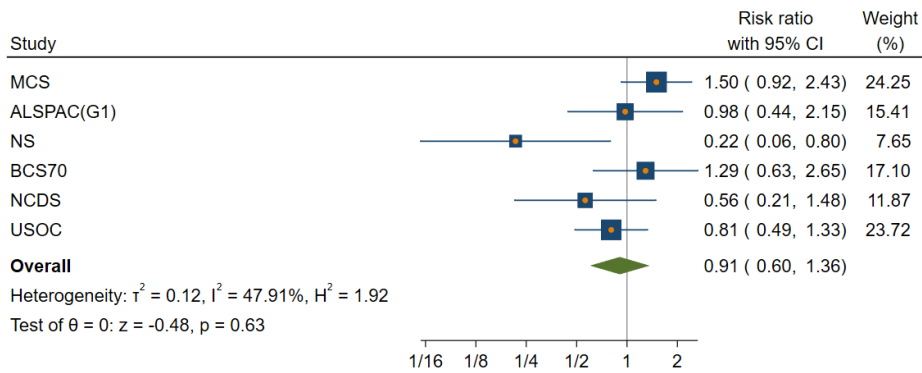

Random-effects REML model

Sleep more than before  
Became employed vs. Stable employed

full adjustment

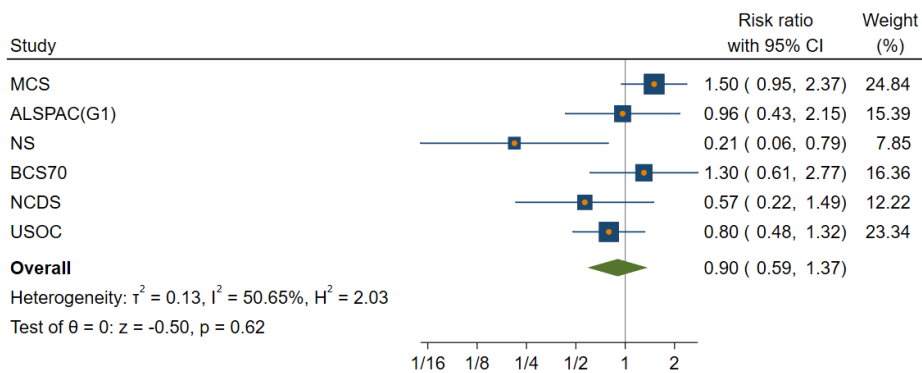

Random-effects REML model

Sleep more than before  
Stable non-employed vs. Stable employed

unadjusted

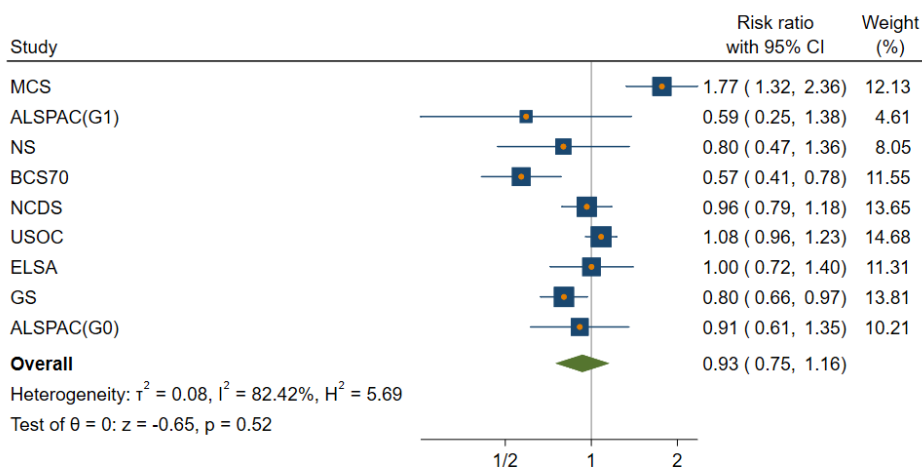

Random-effects REML model

Sleep more than before  
Stable non-employed vs. Stable employed

basic adjustment

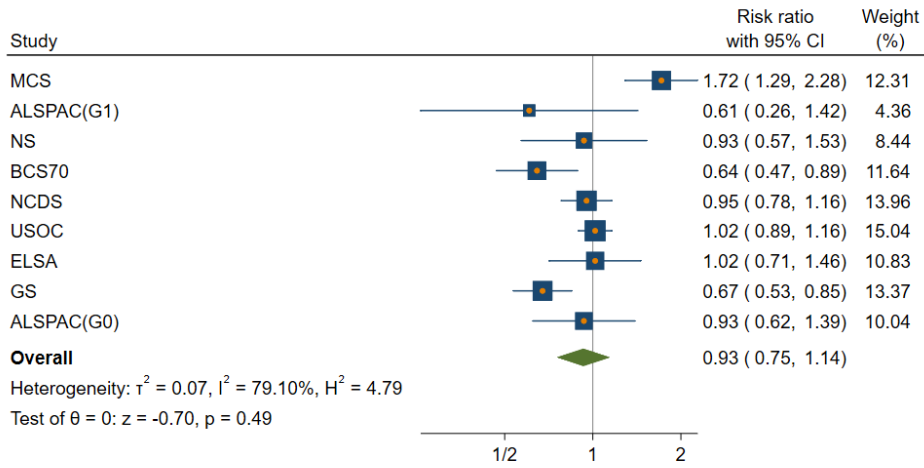

Random-effects REML model

Sleep more than before  
Stable non-employed vs. Stable employed

full adjustment

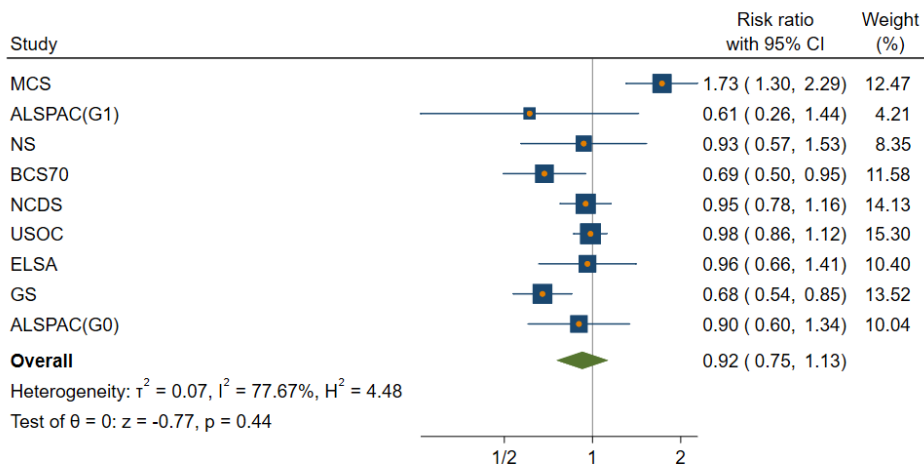

Random-effects REML model

## Figure set 10: From 6/9 hours a night to outside 'normal range'

From 6/9h a night to outside 'normal range'  
Furloughed vs. Stable employed

unadjusted

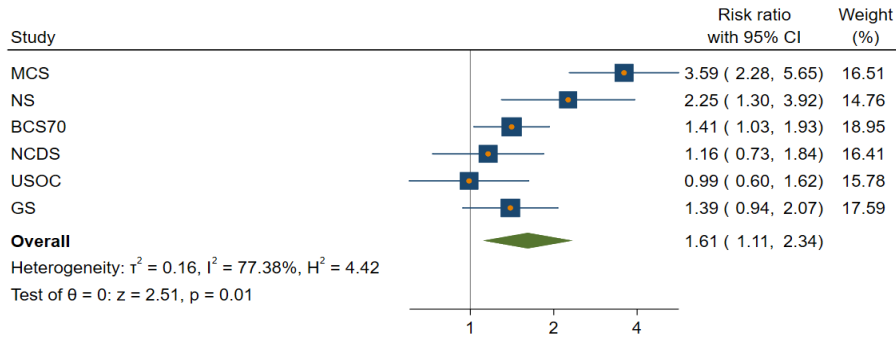

Random-effects REML model

From 6/9h a night to outside 'normal range'  
Furloughed vs. Stable employed

basic adjustment

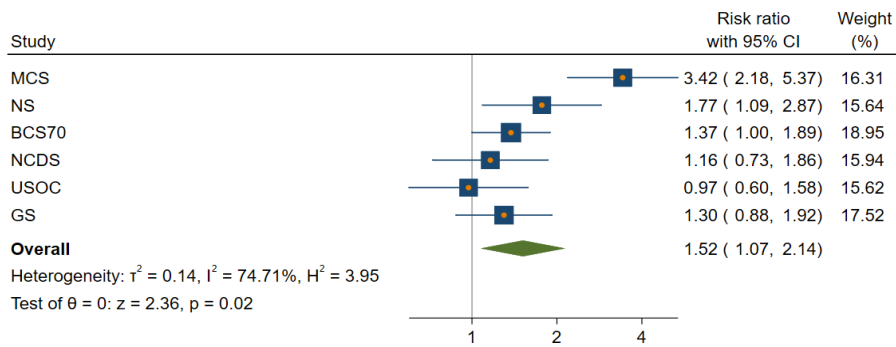

Random-effects REML model

From 6/9h a night to outside 'normal range'  
Furloughed vs. Stable employed

full adjustment

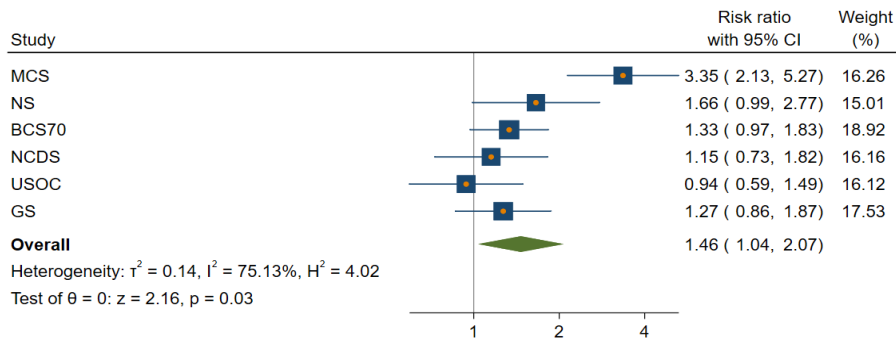

Random-effects REML model

From 6/9h a night to outside 'normal range  
No longer employed vs. Stable employed

unadjusted

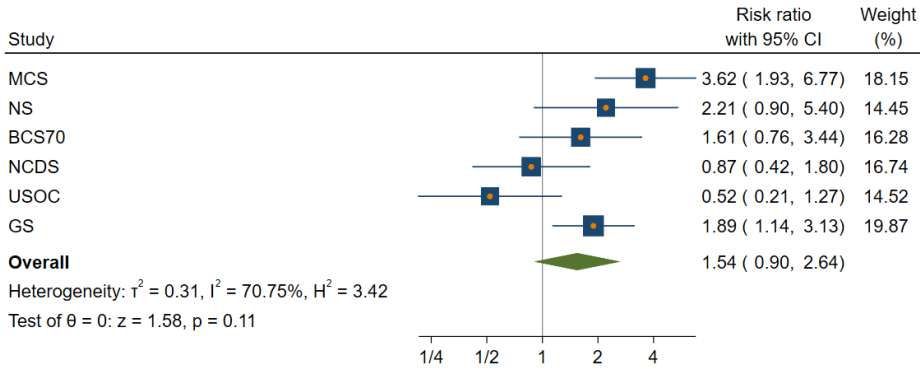

Random-effects REML model

From 6/9h a night to outside 'normal range  
No longer employed vs. Stable employed

basic adjustment

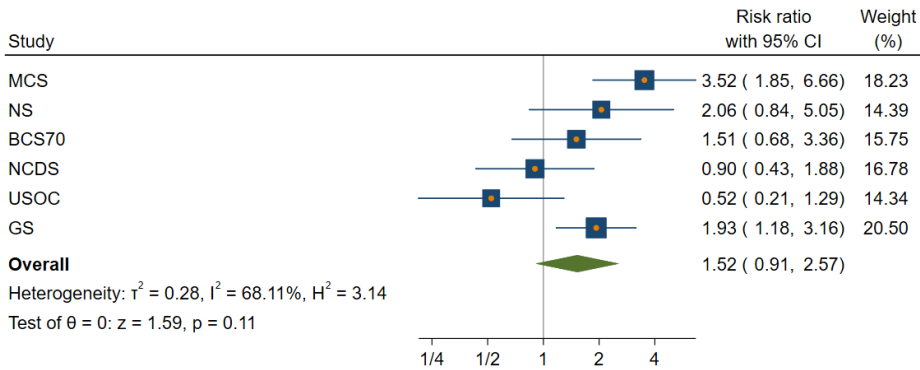

Random-effects REML model

From 6/9h a night to outside 'normal range  
No longer employed vs. Stable employed

full adjustment

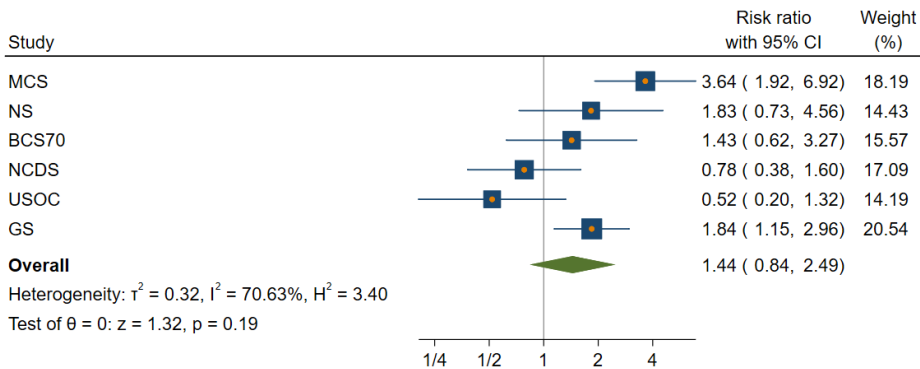

Random-effects REML model



From 6/9h a night to outside 'normal range  
Stable unemployed vs. Stable employed

unadjusted

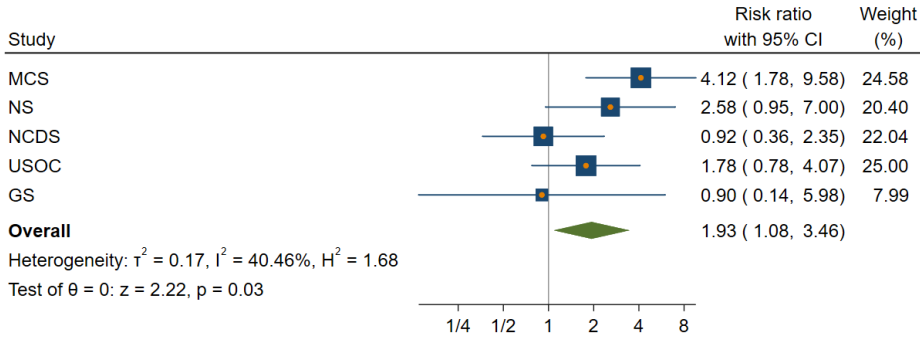

Random-effects REML model

From 6/9h a night to outside 'normal range  
Stable unemployed vs. Stable employed

basic adjustment

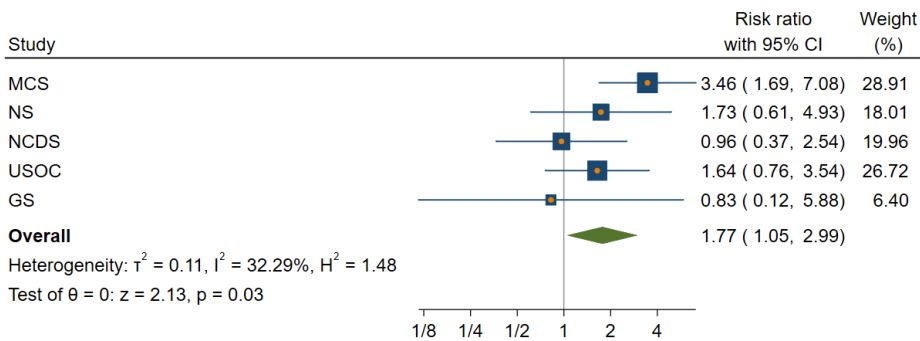

Random-effects REML model

From 6/9h a night to outside 'normal range  
Stable unemployed vs. Stable employed

full adjustment

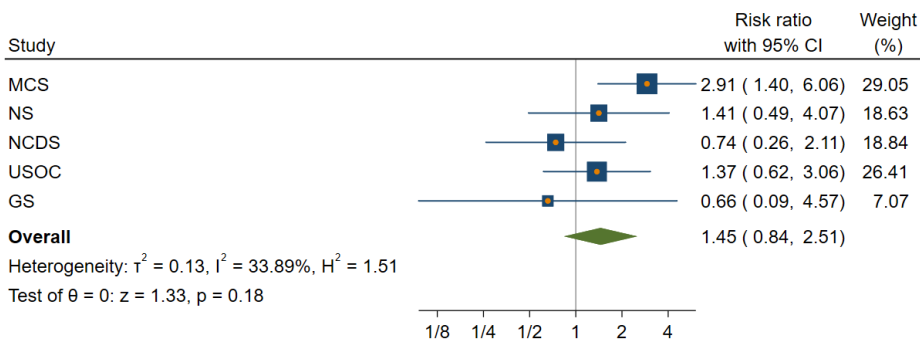

Random-effects REML model

From 6/9h a night to outside 'normal range  
Became employed vs. Stable employed

unadjusted

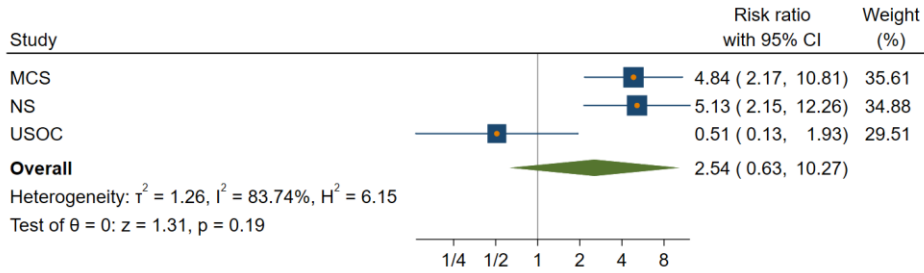

Random-effects REML model

From 6/9h a night to outside 'normal range  
Became employed vs. Stable employed

basic adjustment

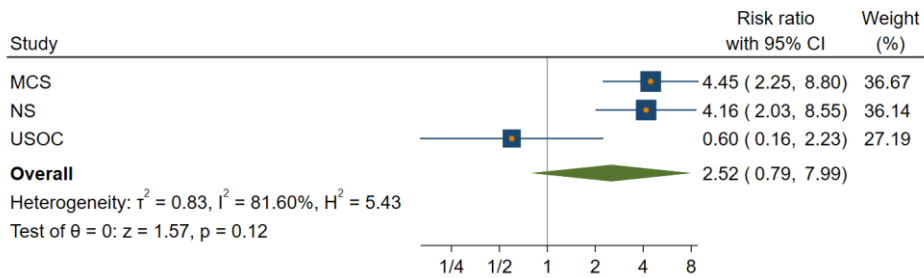

Random-effects REML model

From 6/9h a night to outside 'normal range  
Became employed vs. Stable employed

full adjustment

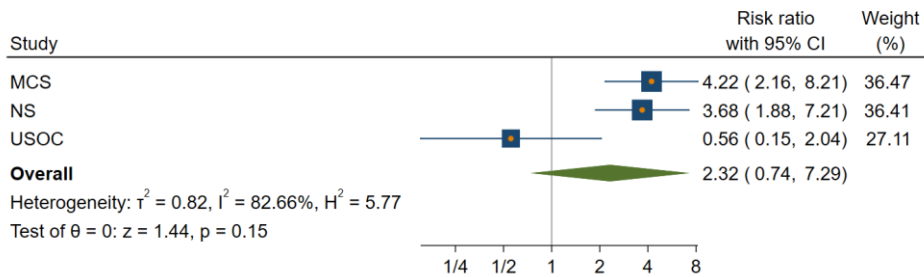

Random-effects REML model

From 6/9h a night to outside 'normal range  
Stable non-employed vs. Stable employed

unadjusted

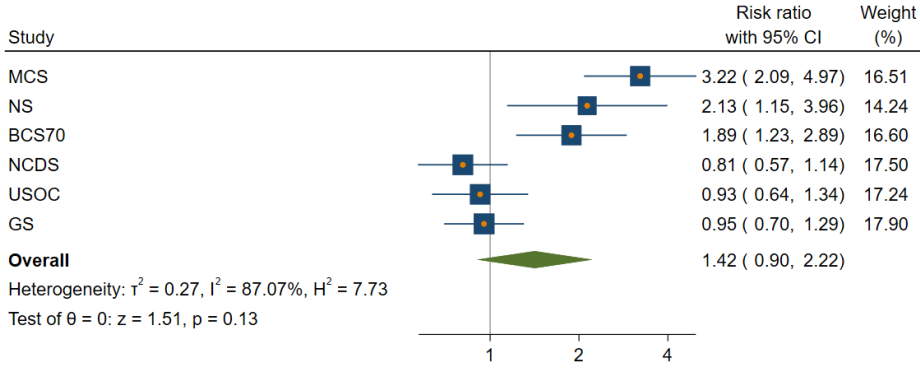

Random-effects REML model

From 6/9h a night to outside 'normal range  
Stable non-employed vs. Stable employed

basic adjustment

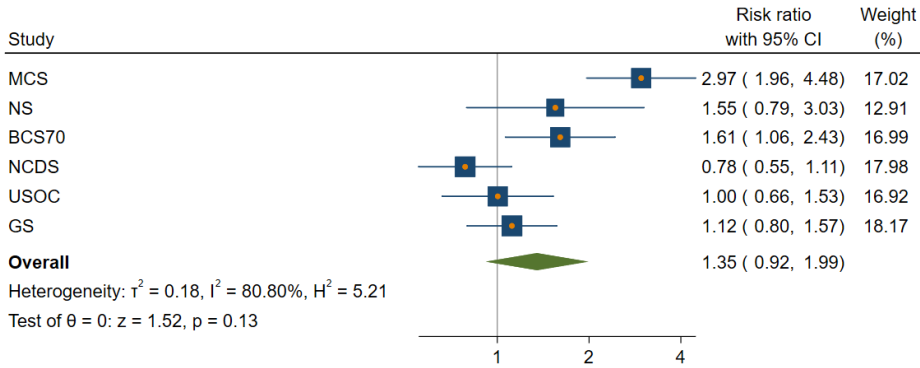

Random-effects REML model

From 6/9h a night to outside 'normal range  
Stable non-employed vs. Stable employed

full adjustment

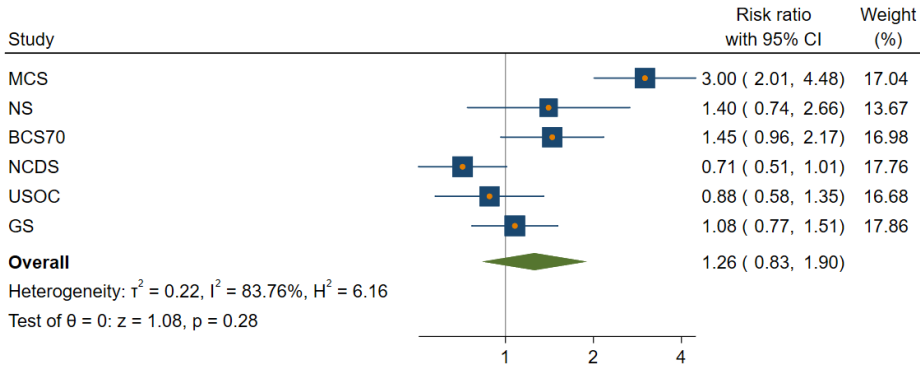

Random-effects REML model

## Figure set 11: From outside 'normal range' to 6/9h a night

From outside 'normal range' to 6/9h a night  
Furloughed vs. Stable employed

unadjusted

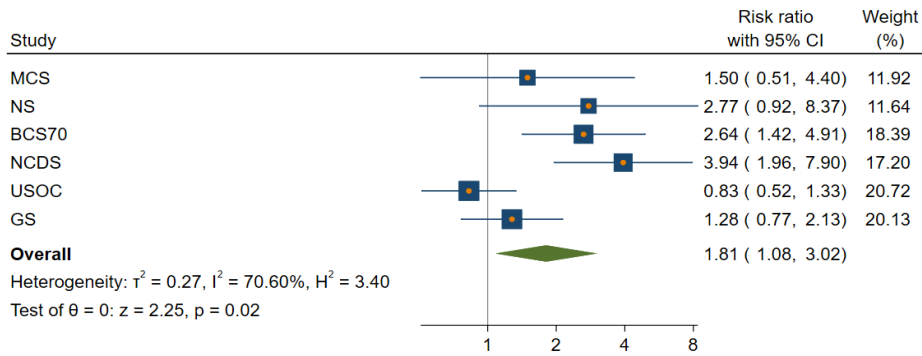

Random-effects REML model

From outside 'normal range' to 6/9h a night  
Furloughed vs. Stable employed

basic adjustment

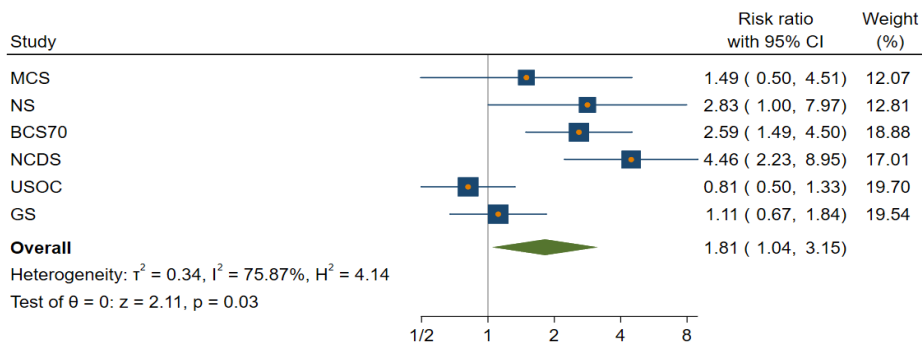

Random-effects REML model

From outside 'normal range' to 6/9h a night  
Furloughed vs. Stable employed

full adjustment

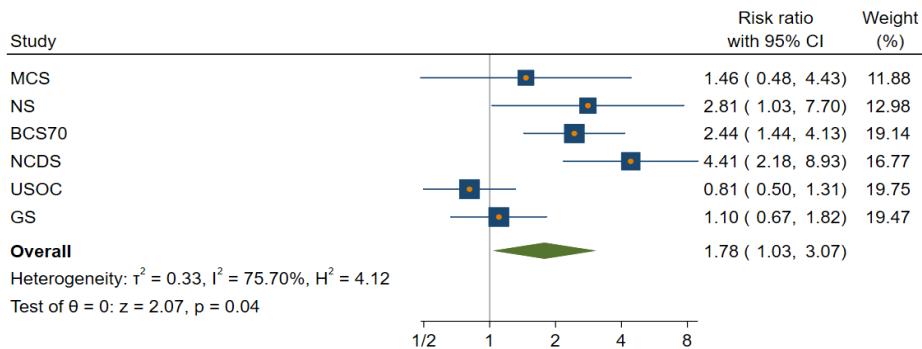

Random-effects REML model

From outside 'normal range' to 6/9h a night  
No longer employed vs. Stable employed

unadjusted

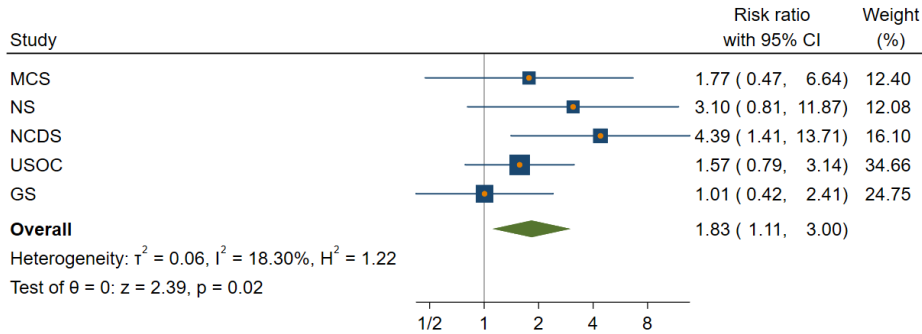

Random-effects REML model

From outside 'normal range' to 6/9h a night  
No longer employed vs. Stable employed

basic adjustment

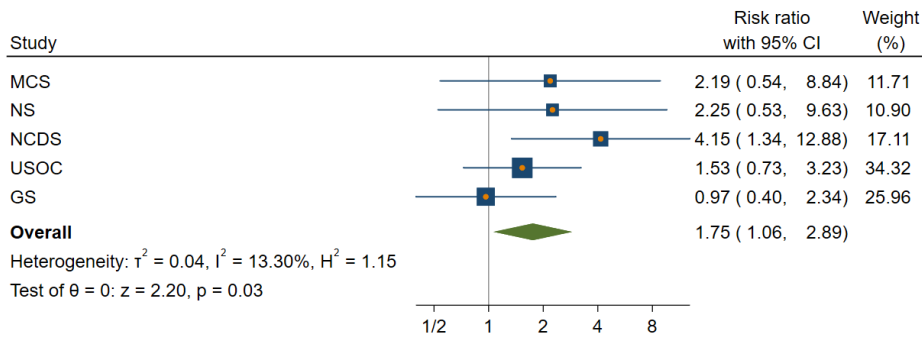

Random-effects REML model

From outside 'normal range' to 6/9h a night  
No longer employed vs. Stable employed

full adjustment

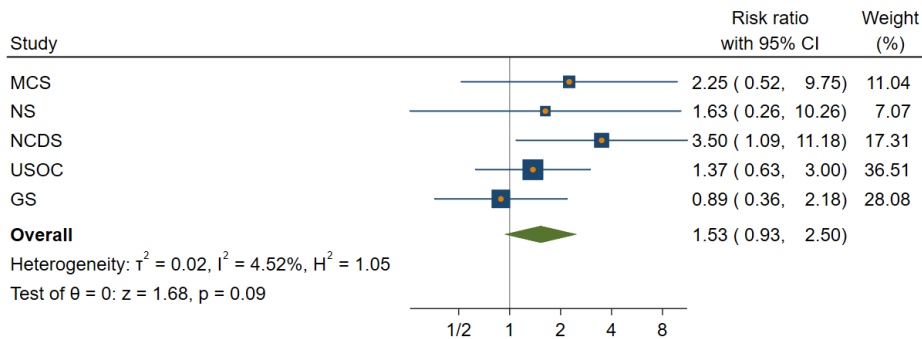

Random-effects REML model

From outside 'normal range' to 6/9h a night  
Stable unemployed vs. Stable employed

unadjusted

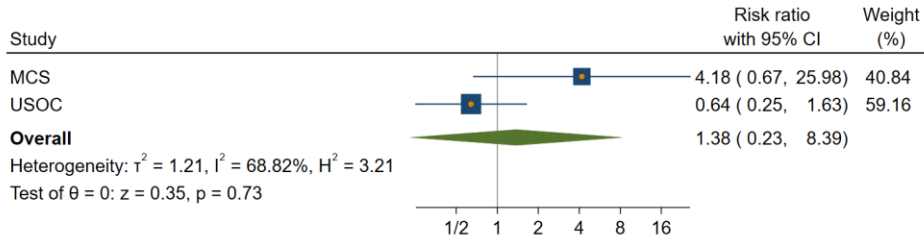

Random-effects REML model

From outside 'normal range' to 6/9h a night  
Stable unemployed vs. Stable employed

basic adjustment

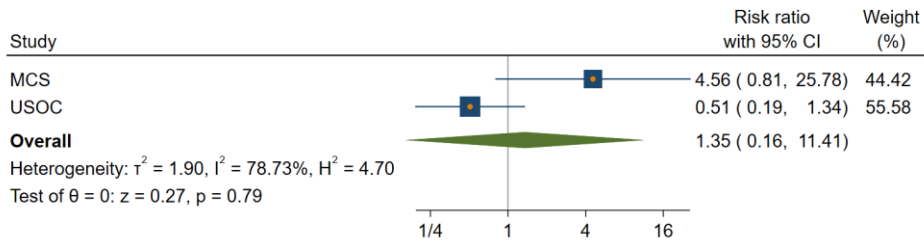

Random-effects REML model

From outside 'normal range' to 6/9h a night  
Stable unemployed vs. Stable employed

full adjustment

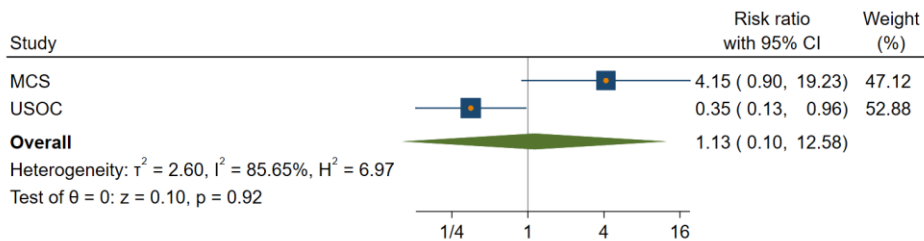

Random-effects REML model

From outside 'normal range' to 6/9h a night  
Became employed vs. Stable employed

unadjusted

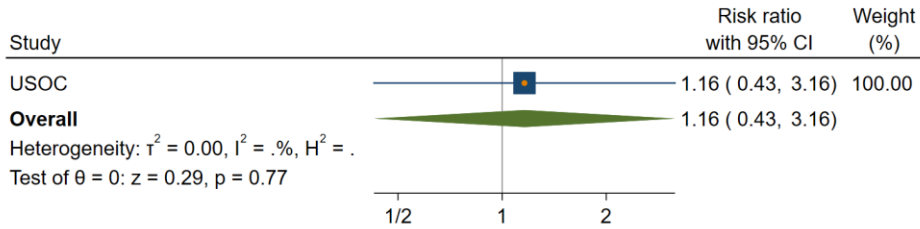

Random-effects REML model

From outside 'normal range' to 6/9h a night  
Became employed vs. Stable employed

basic adjustment

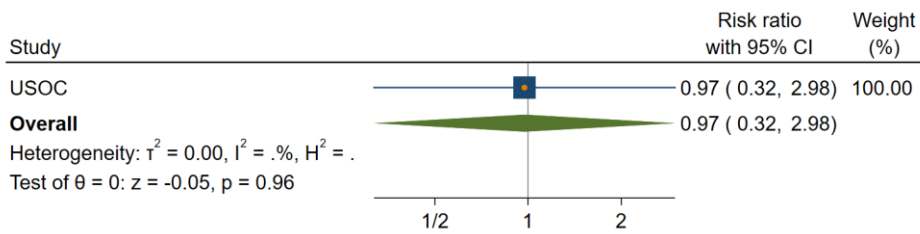

Random-effects REML model

From outside 'normal range' to 6/9h a night  
Became employed vs. Stable employed

full adjustment

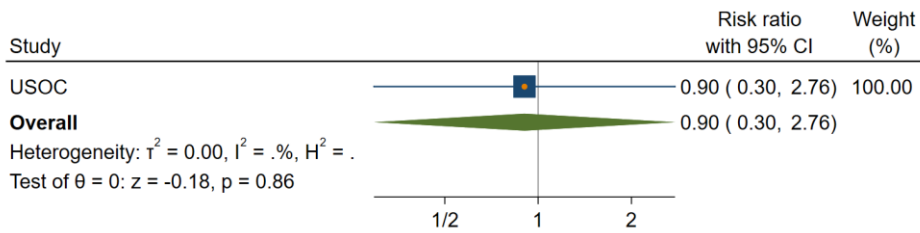

Random-effects REML model

From outside 'normal range' to 6/9h a night  
Stable non-employed vs. Stable employed

unadjusted

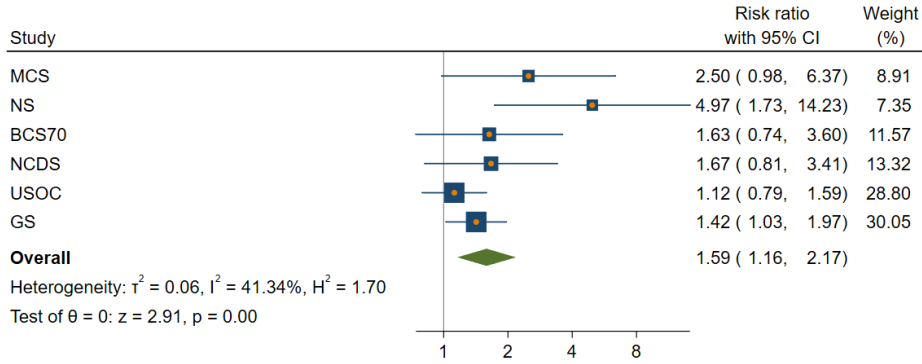

Random-effects REML model

From outside 'normal range' to 6/9h a night  
Stable non-employed vs. Stable employed

basic adjustment

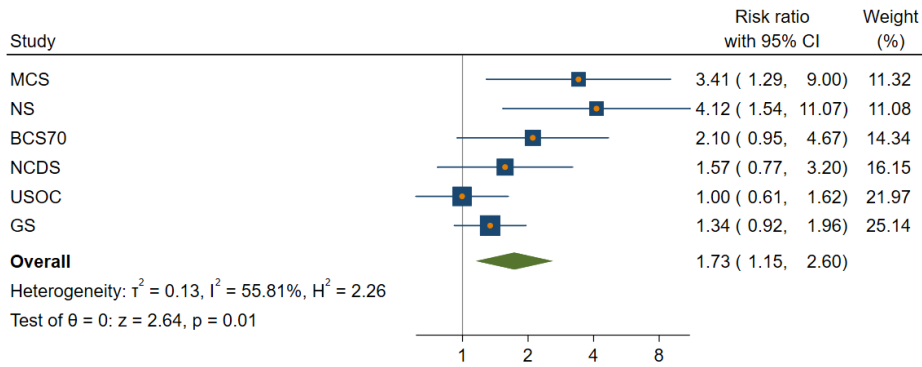

Random-effects REML model

From outside 'normal range' to 6/9h a night  
Stable non-employed vs. Stable employed

full adjustment

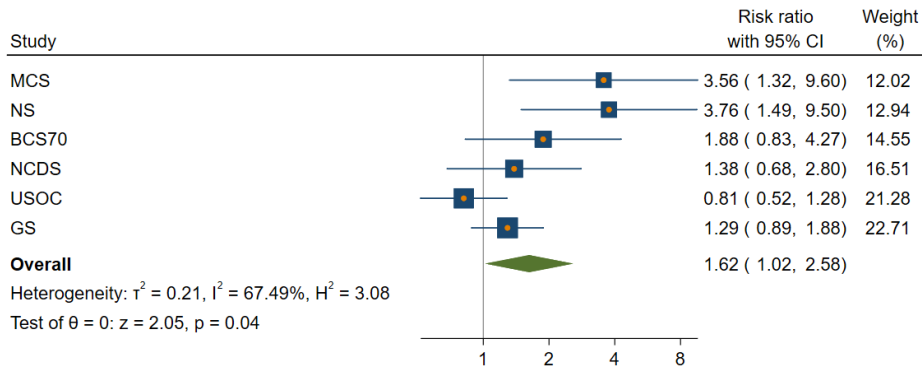

Random-effects REML model
