# Supplementary material for: Correction: The UK Coronavirus Job Retention Scheme and diet, physical activity, and sleep during the COVID-19 pandemic: evidence from eight longitudinal population surveys
Source: Springer Nature journal article supplement (doi:10.1186/s12916-022-02502-1), 2022-07-30
Supplement: MOESM3 [file 23320858]

# Additional File 4: Stratified Results

## Results stratified by Age

- Figure set 1: Currently eats 2 or fewer fruit & veg ..... 3
- Figure set 2: Fewer fruit & veg ..... 5
- Figure set 3: More fruit & veg ..... 7
- Figure set 4: Less than 3 days a week of at least 30min exercise ..... 9
- Figure set 5: Less time/ fewer days of physical exercise ..... 11
- Figure set 6: More time/ days of physical exercise ..... 14
- Figure set 7: Sleeps outside 'Normal Range' (i.e. <6 or 9+ hours) ..... 17
- Figure set 8: Sleeps less than before ..... 19
- Figure set 9: Sleeps less than before ..... 22
- Figure set 10: From 6/9h a night to outside 'normal range' ..... 25
- Figure set 11: From outside 'normal range' to 6/9h a night ..... 27

## Results stratified by Education

- Figure set 12: Currently eats 2 or fewer fruit and veg ..... 29
- Figure set 13: Fewer fruit and veg ..... 31
- Figure set 14: More fruit and veg ..... 33
- Figure set 15: Less than 3 days a week of at least 30min exercise ..... 35
- Figure set 16: Less time/ fewer days of physical exercise ..... 37
- Figure set 17: More time/ days of physical exercise ..... 40
- Figure set 18: Sleeps outside 'normal range' (i.e. <6 or 9+ hours) ..... 43
- Figure set 19: Sleeps less than before ..... 45
- Figure set 20: Sleeps more than before ..... 48
- Figure set 21: From 6/9h a night to 'normal range' ..... 51
- Figure set 22: From 'normal range' to 6/9h a night ..... 53

**Results stratified by Sex**

Figure set 23: Currently eats 2 or fewer fruit and veg ..... 55  
Figure set 24: Fewer fruit and veg ..... 57  
Figure set 25: More fruit and veg ..... 59  
Figure set 26: Less than 3 days a week of at least 30min exercise ..... 61  
Figure set 27: Less time/fewer days of physical exercise ..... 63  
Figure set 28: More time/ days of physical exercise ..... 66  
Figure set 29: Sleeps outside ‘normal range’ (i.e. <6 or 9+ hours) ..... 69  
Figure set 30: Sleeps less than before ..... 71  
Figure set 31: Sleeps more than before ..... 74  
Figure set 32: From 6/9h a night to outside ‘normal range’ ..... 77  
Figure set 33: From outside ‘normal range’ to 6/9h a night ..... 79

Notes: Moderation by age, education, and sex was assessed with stratified regressions using “full” adjustment that includes socio-demographic characteristics as well as pre-pandemic measures of psychological distress, self-rated health, and health behaviours

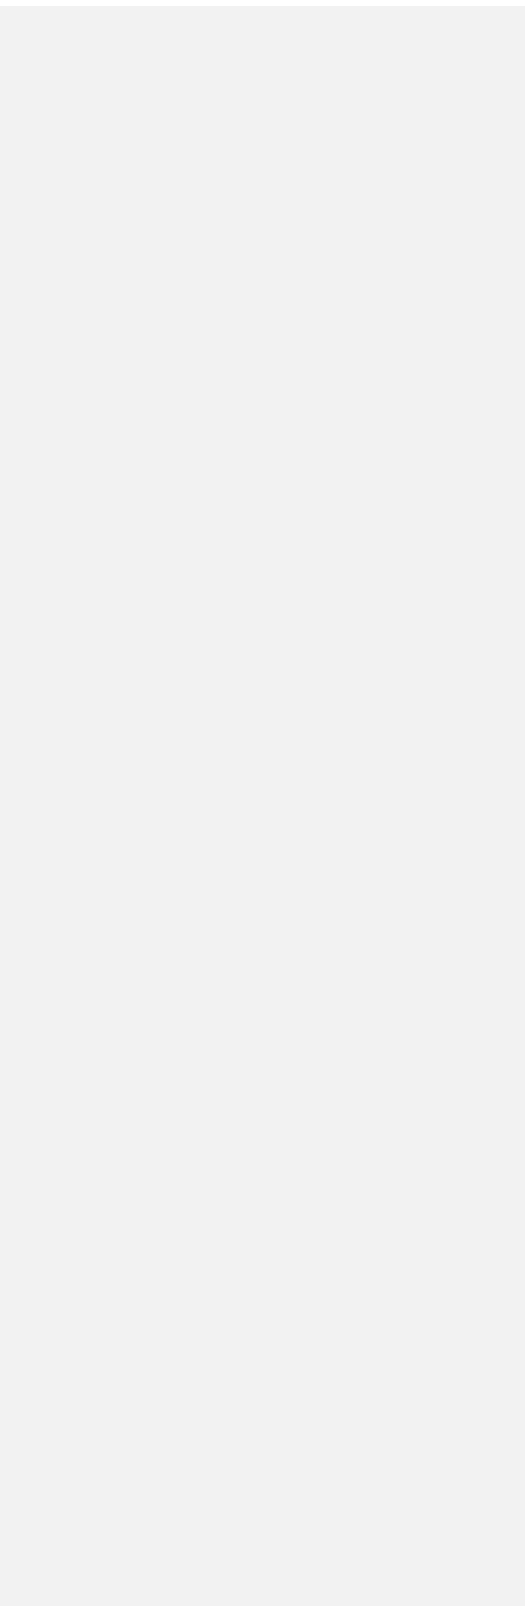

**Figure set 1: Currently eats 2 or fewer fruit & veg**

Currently eats 2 or fewer fruit & veg  
Furloughed vs. Stable employed

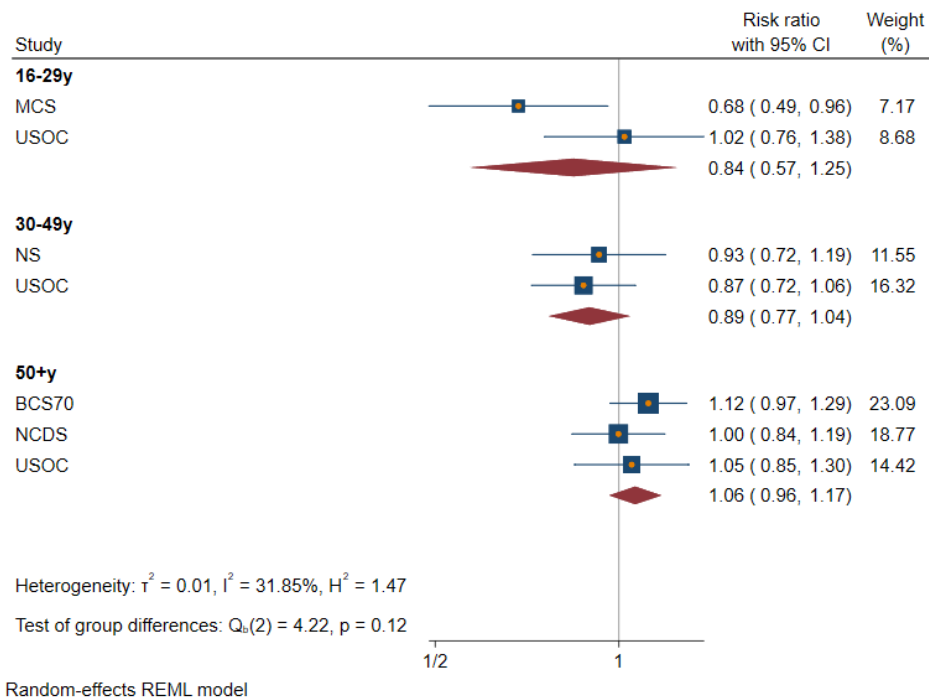

Currently eats 2 or fewer fruit & veg  
No longer employed vs. Stable employed

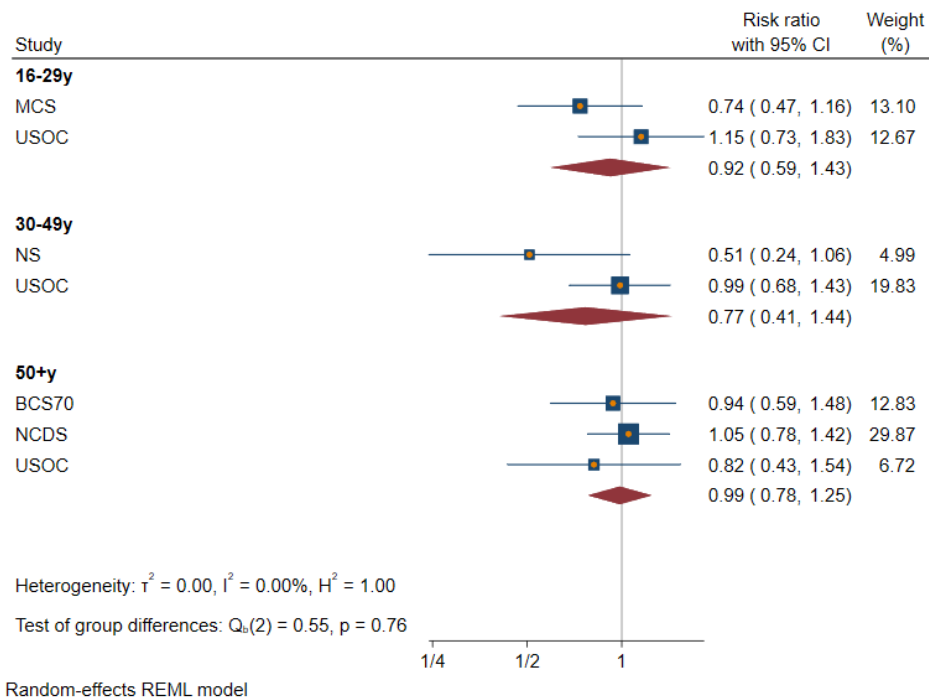

Currently eats 2 or fewer fruit & veg  
Stable unemployed vs. Stable employed

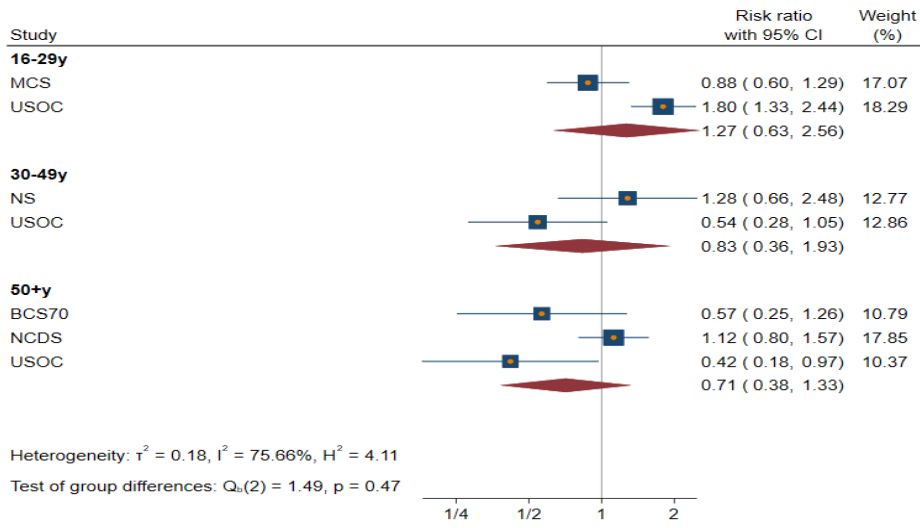

Random-effects REML model

Currently eats 2 or fewer fruit & veg  
Became employed vs. Stable employed

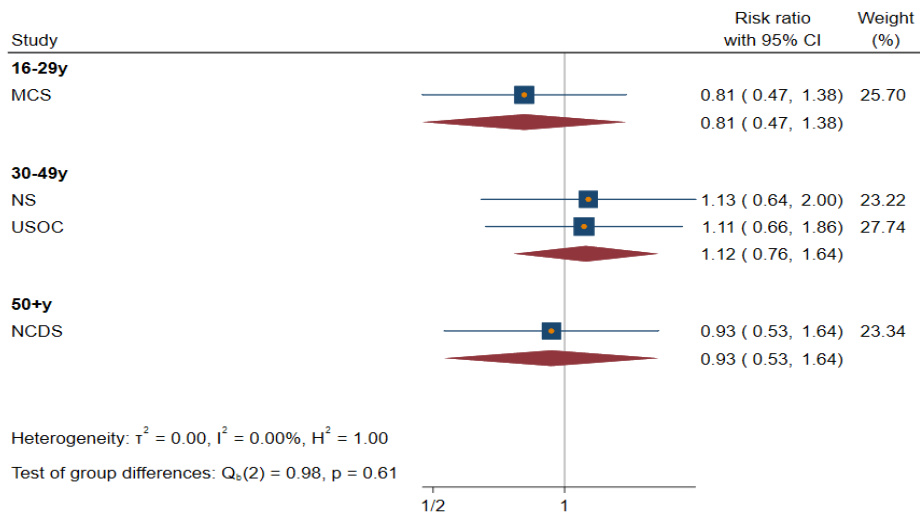

Random-effects REML model

Currently eats 2 or fewer fruit & veg  
Stable non-employed vs. Stable employed

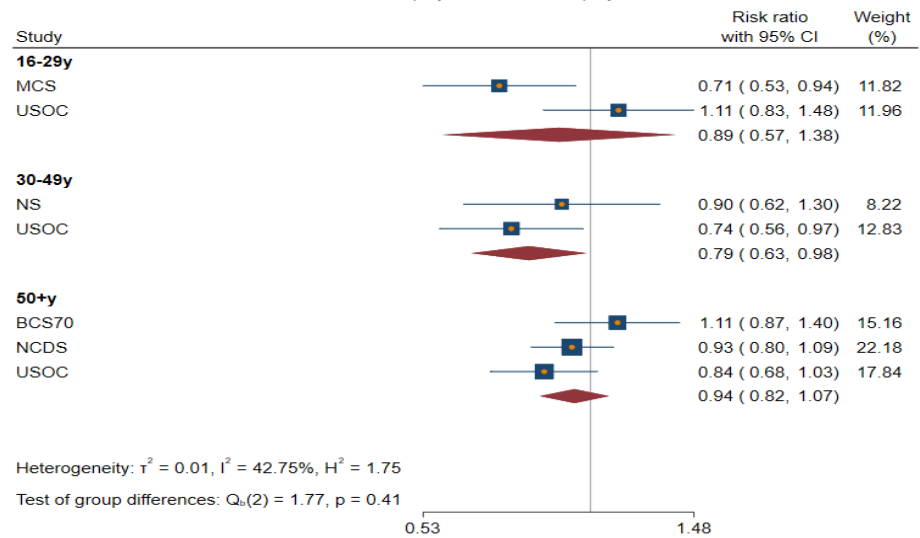

Random-effects REML model

**Figure set 2: Fewer fruit & veg**

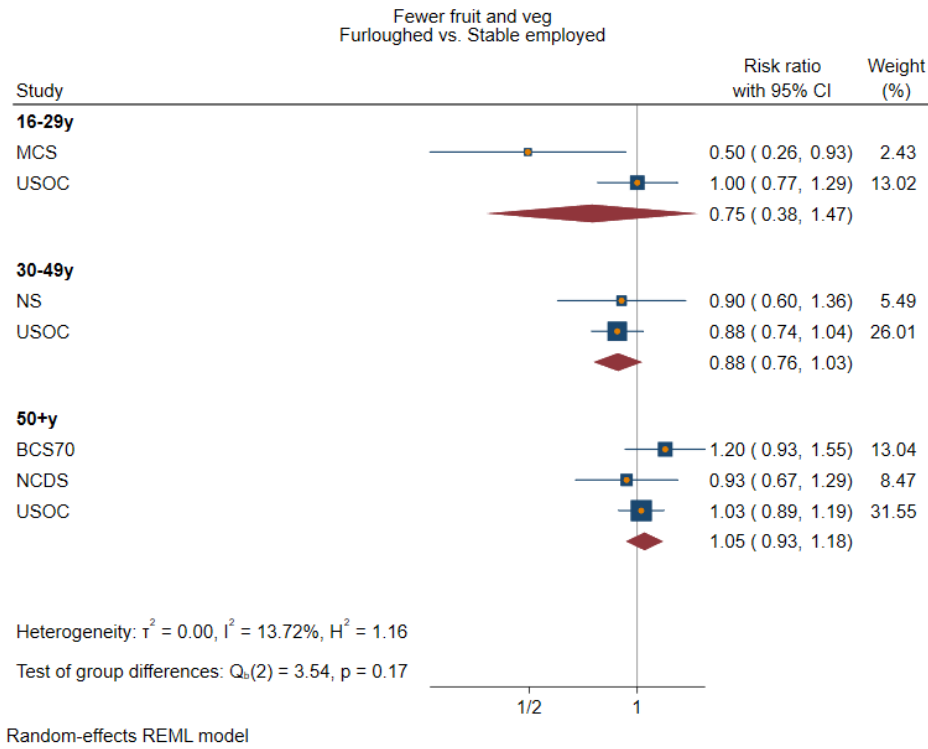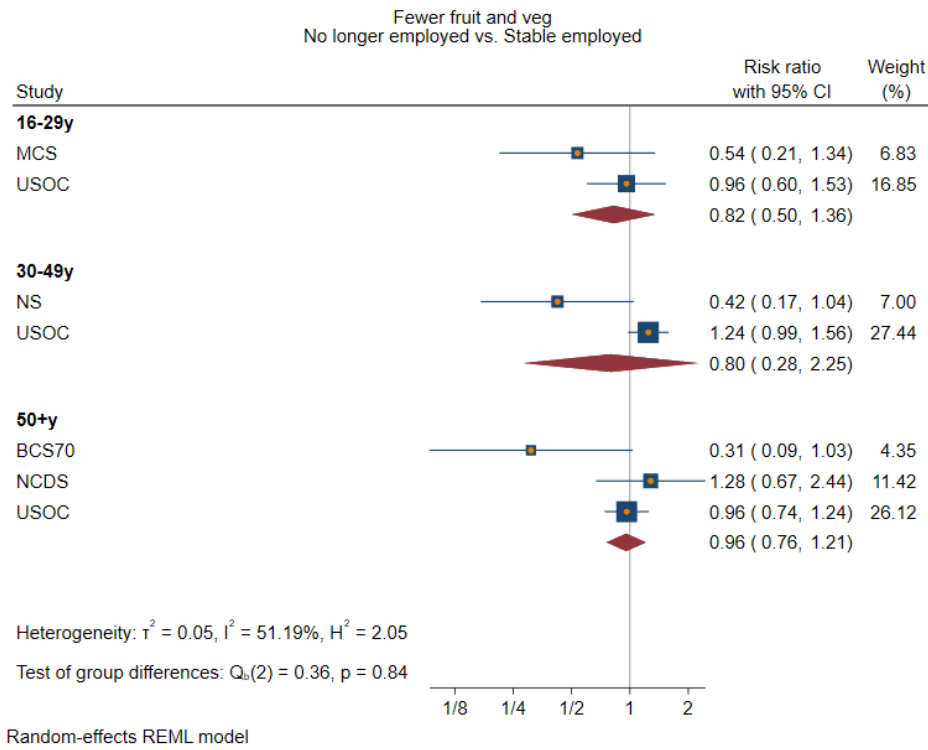

Fewer fruit and veg  
Stable unemployed vs. Stable employed

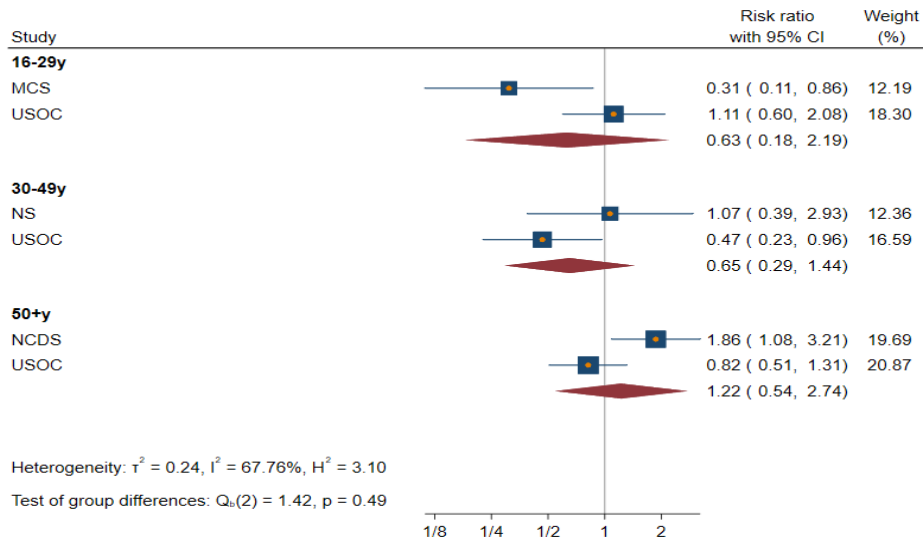

Random-effects REML model

Fewer fruit and veg  
Became employed vs. Stable employed

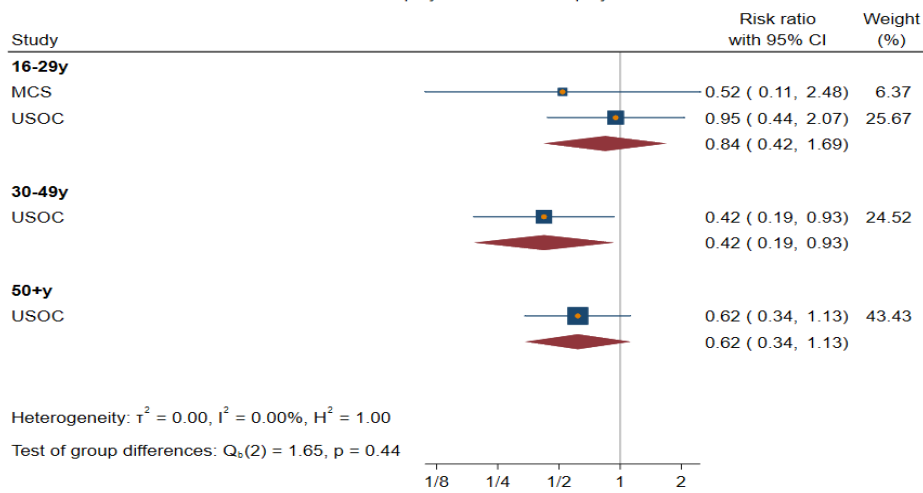

Random-effects REML model

Fewer fruit and veg  
Stable non-employed vs. Stable employed

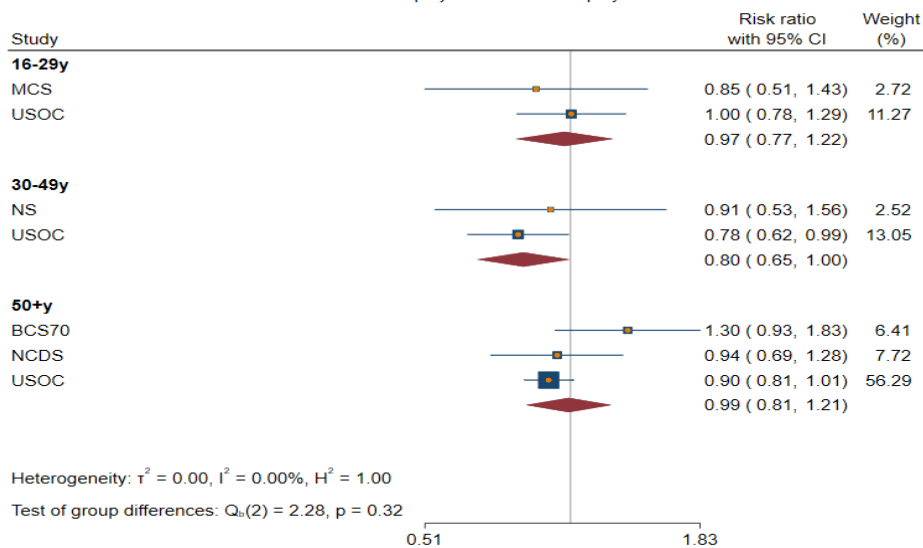

Random-effects REML model

**Figure set 3: More fruit & veg**

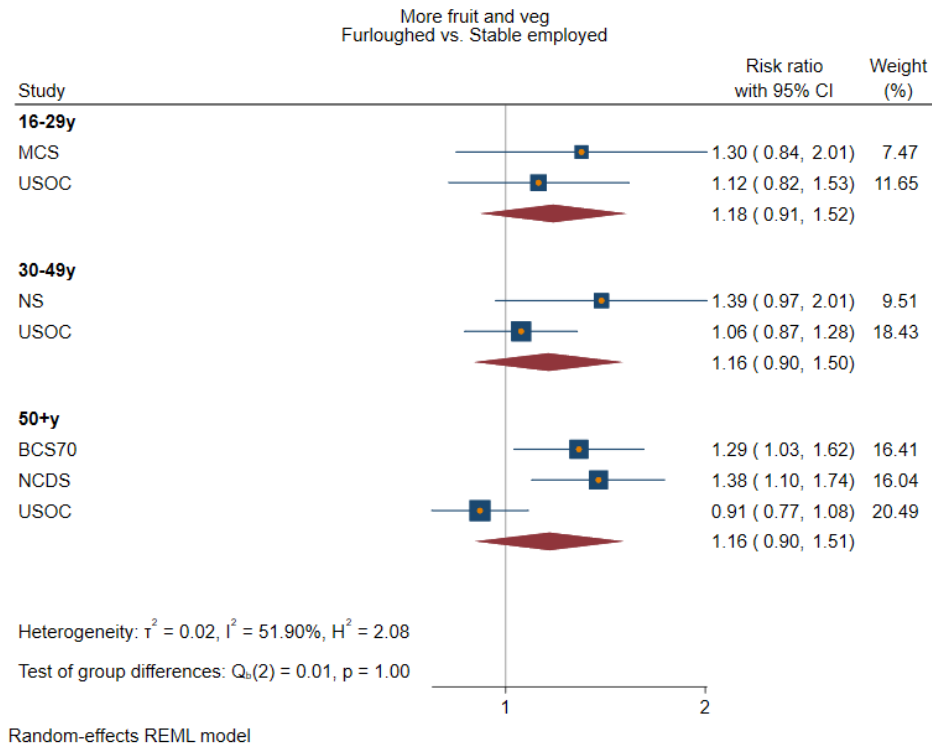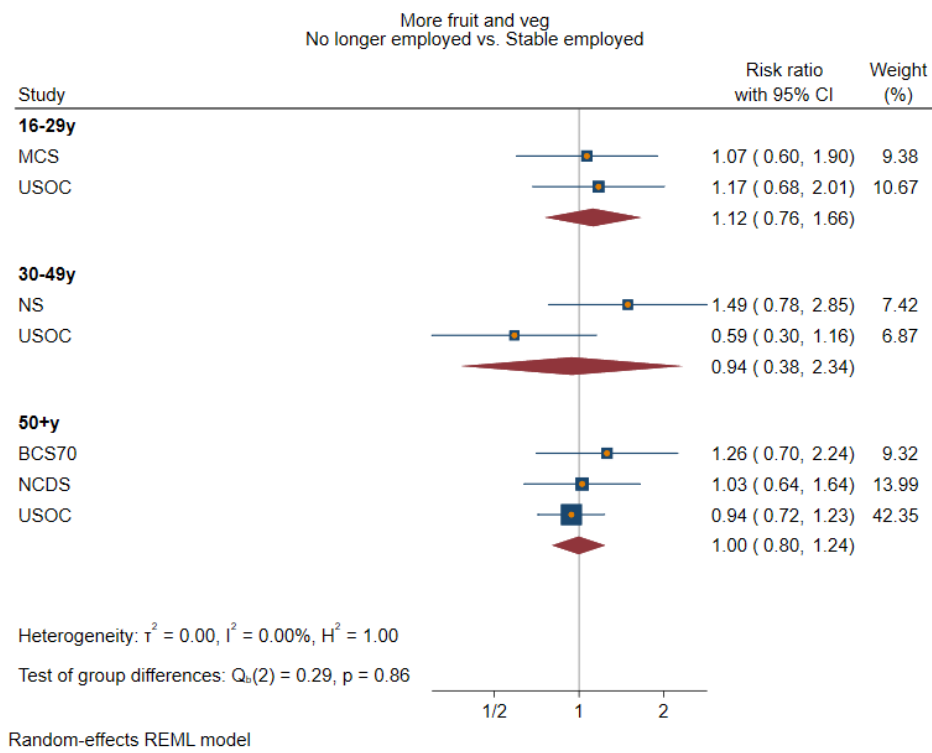

More fruit and veg  
Stable unemployed vs. Stable employed

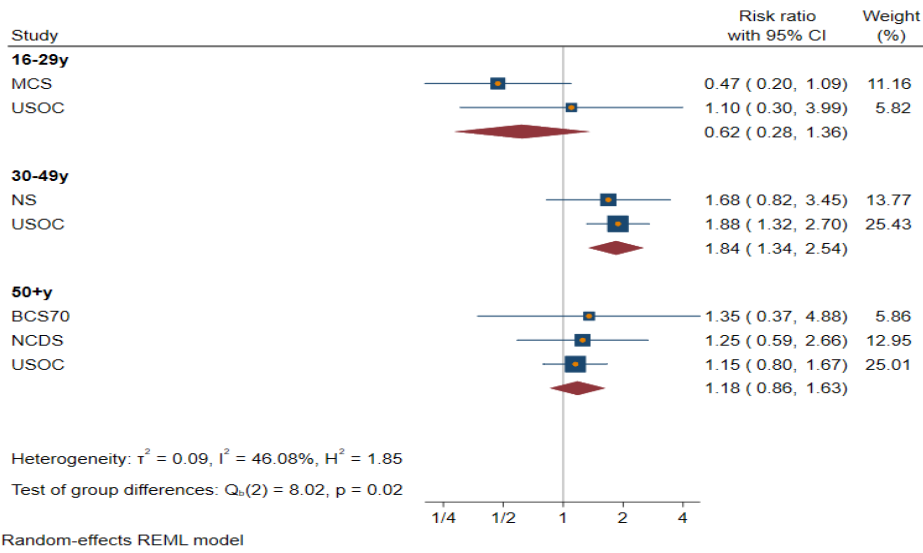

Random-effects REML model

More fruit and veg  
Became employed vs. Stable employed

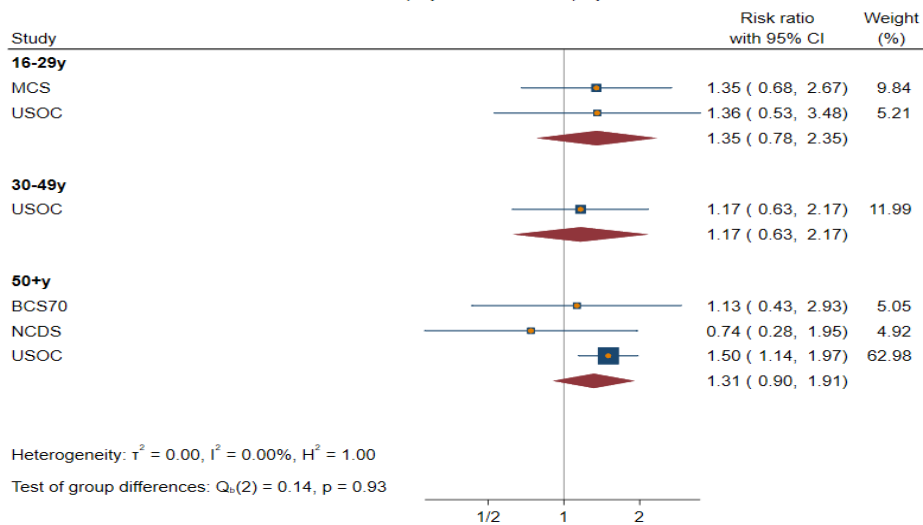

Random-effects REML model

More fruit and veg  
Stable non-employed vs. Stable employed

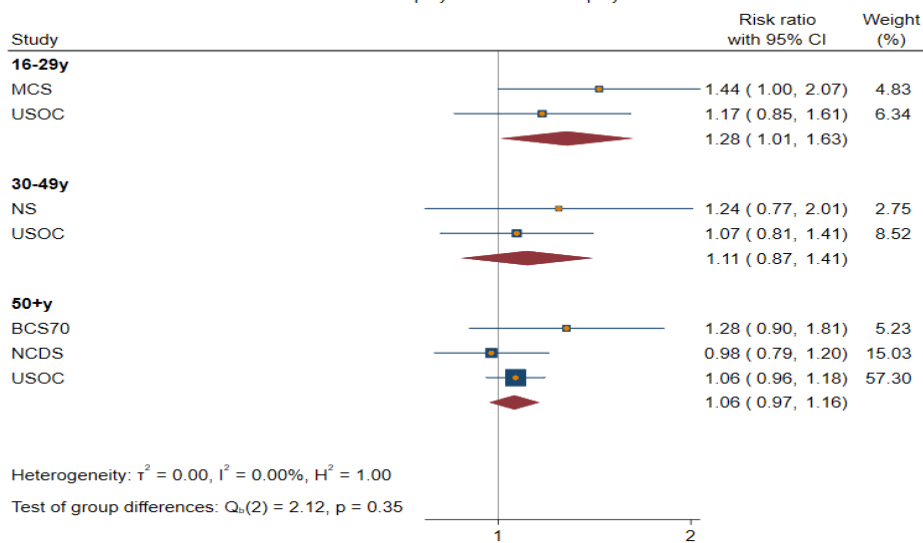

Random-effects REML model



**Figure set 4: Less than 3 days a week of at least 30min exercise**

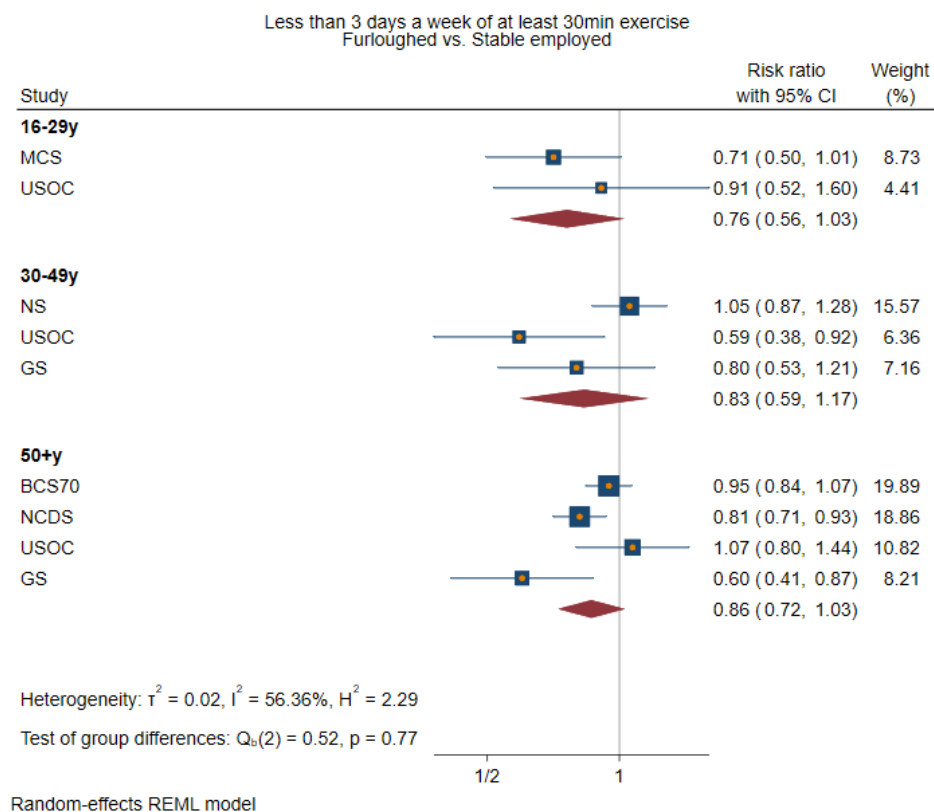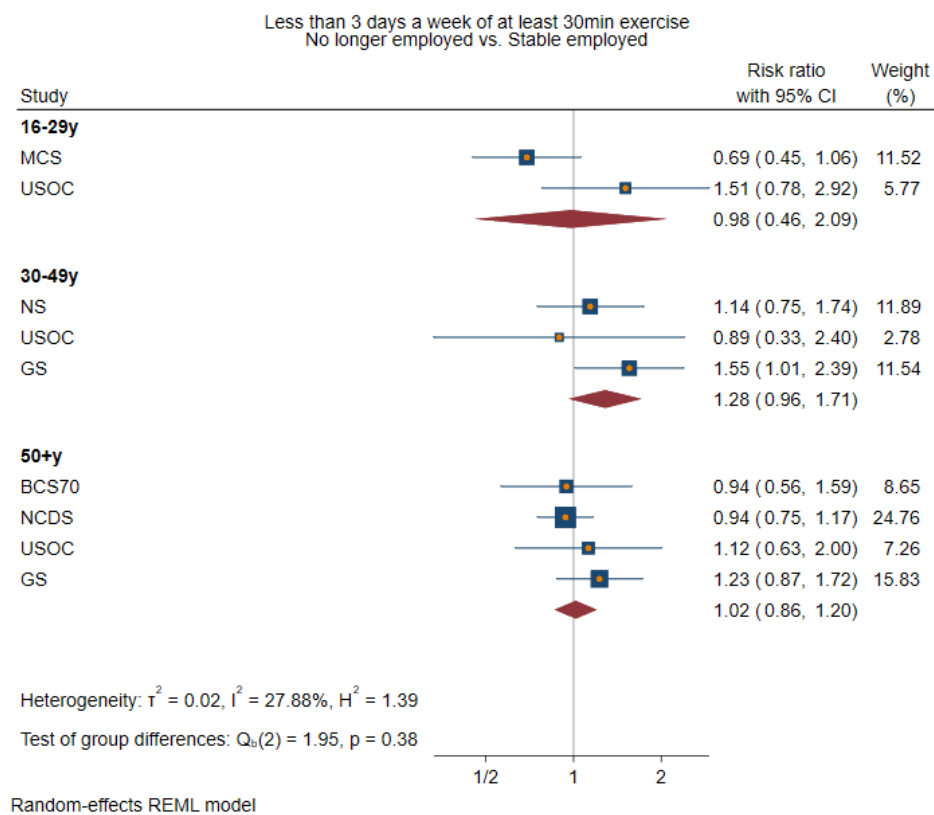

Less than 3 days a week of at least 30min exercise  
Stable unemployed vs. Stable employed

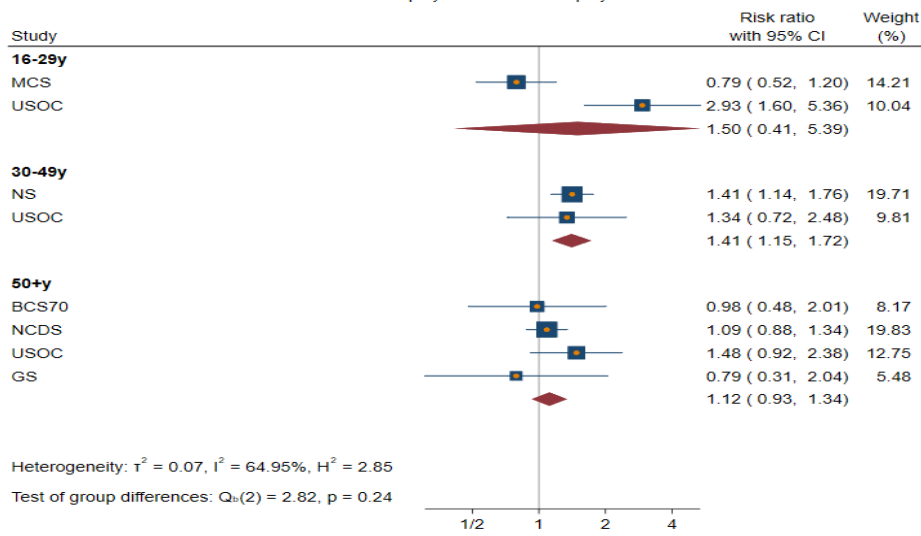

Random-effects REML model

Less than 3 days a week of at least 30min exercise  
Became employed vs. Stable employed

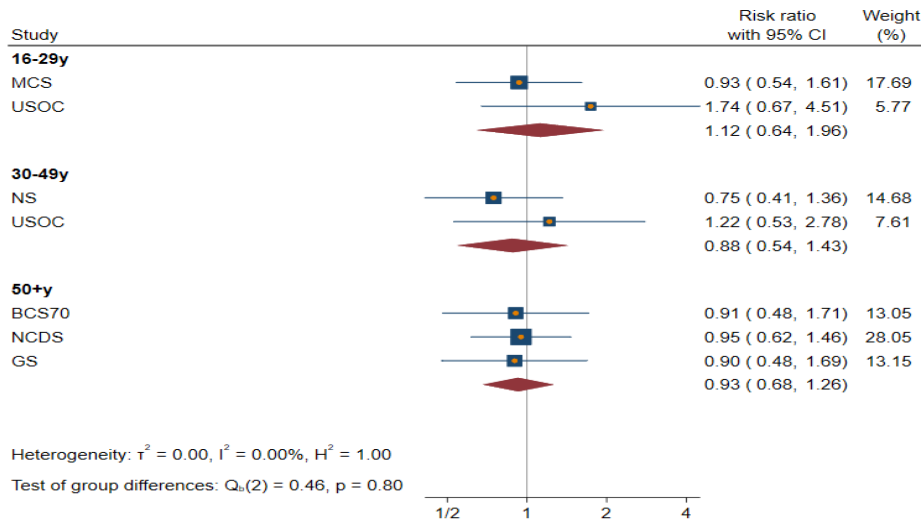

Random-effects REML model

Less than 3 days a week of at least 30min exercise  
Stable non-employed vs. Stable employed

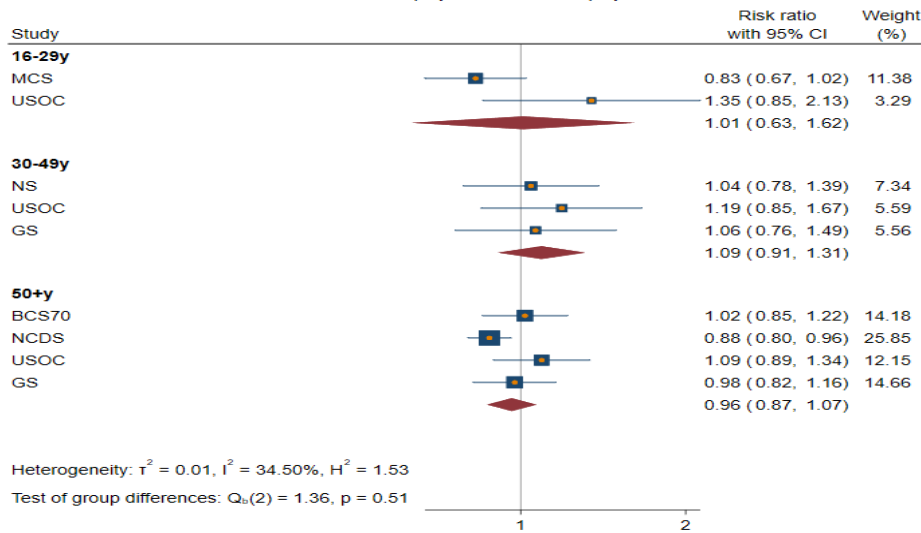

Random-effects REML model

Figure set 5: Less time/ fewer days of physical exercise

Commented [MJ1]:

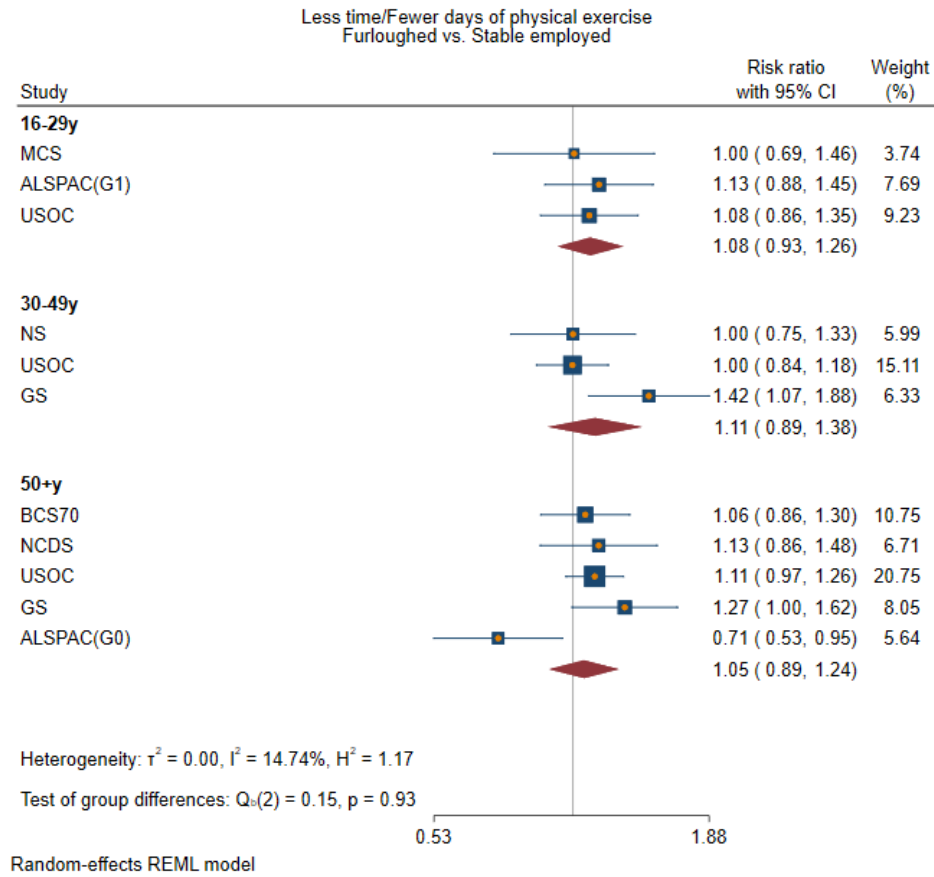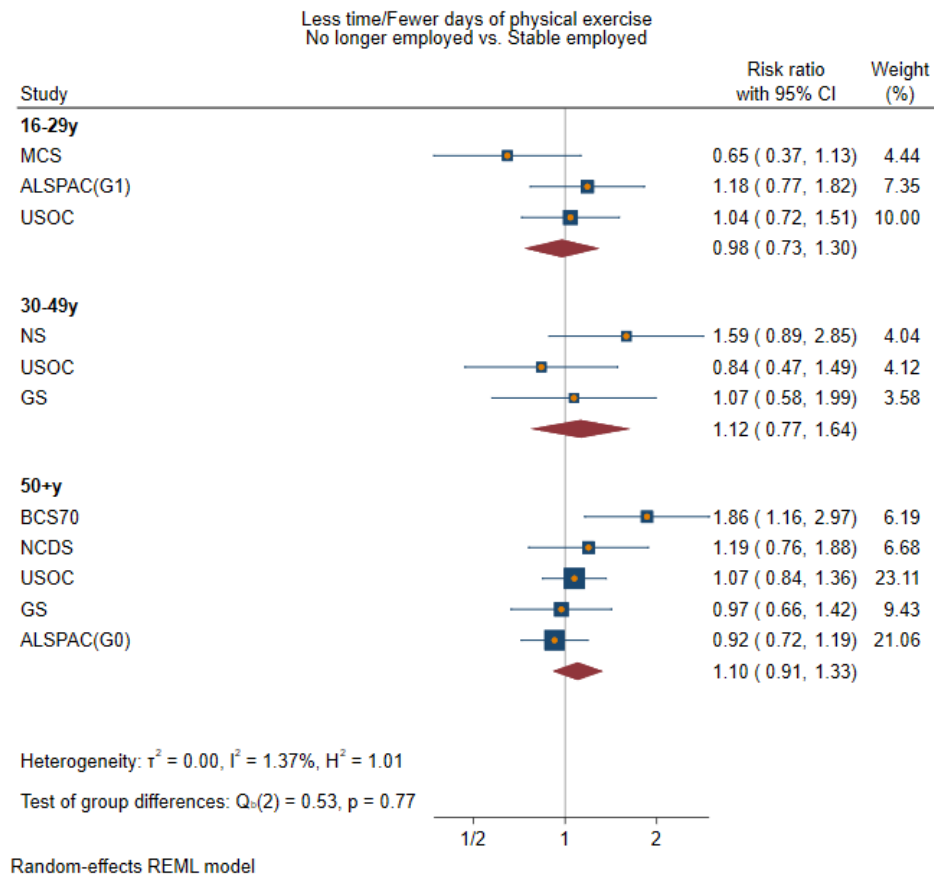

Less time/Fewer days of physical exercise  
Stable unemployed vs. Stable employed

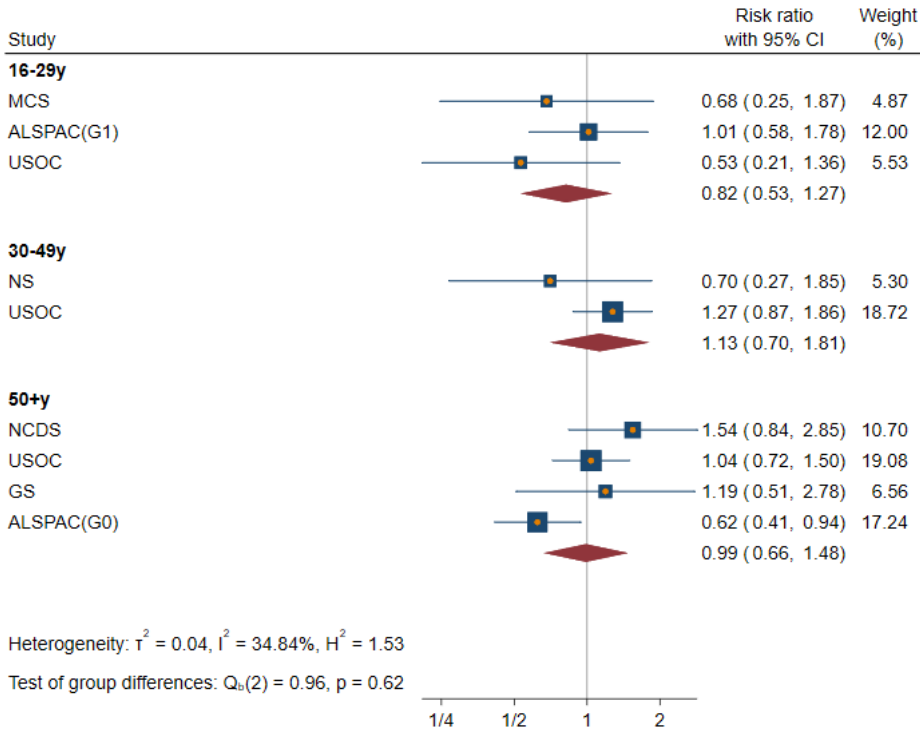

Random-effects REML model

Less time/Fewer days of physical exercise  
Became employed vs. Stable employed

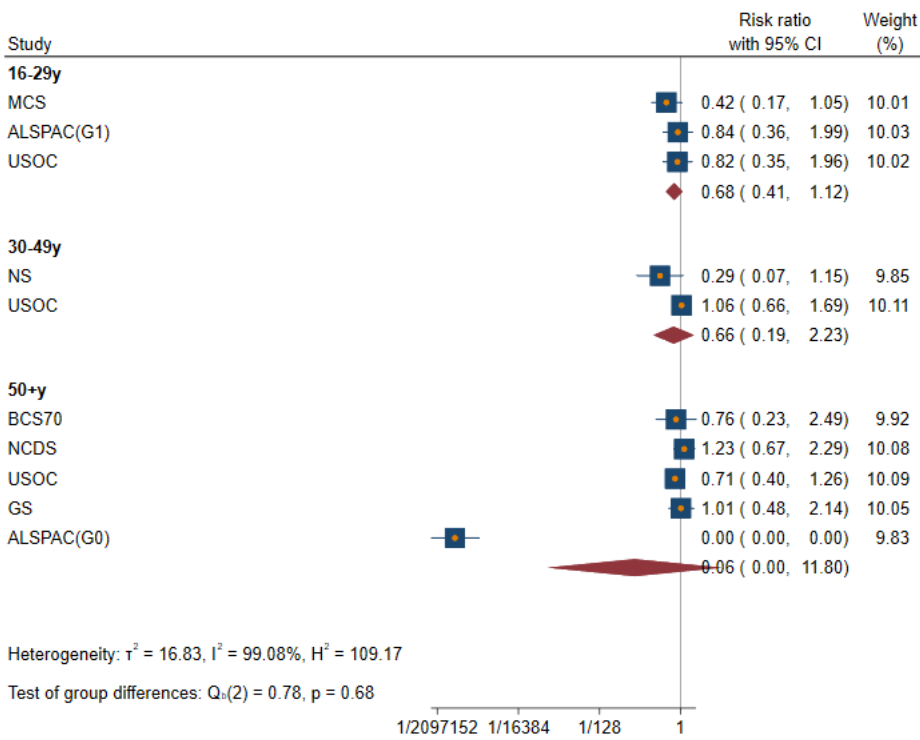

Random-effects REML model

Less time/Fewer days of physical exercise  
Stable non-employed vs. Stable employed

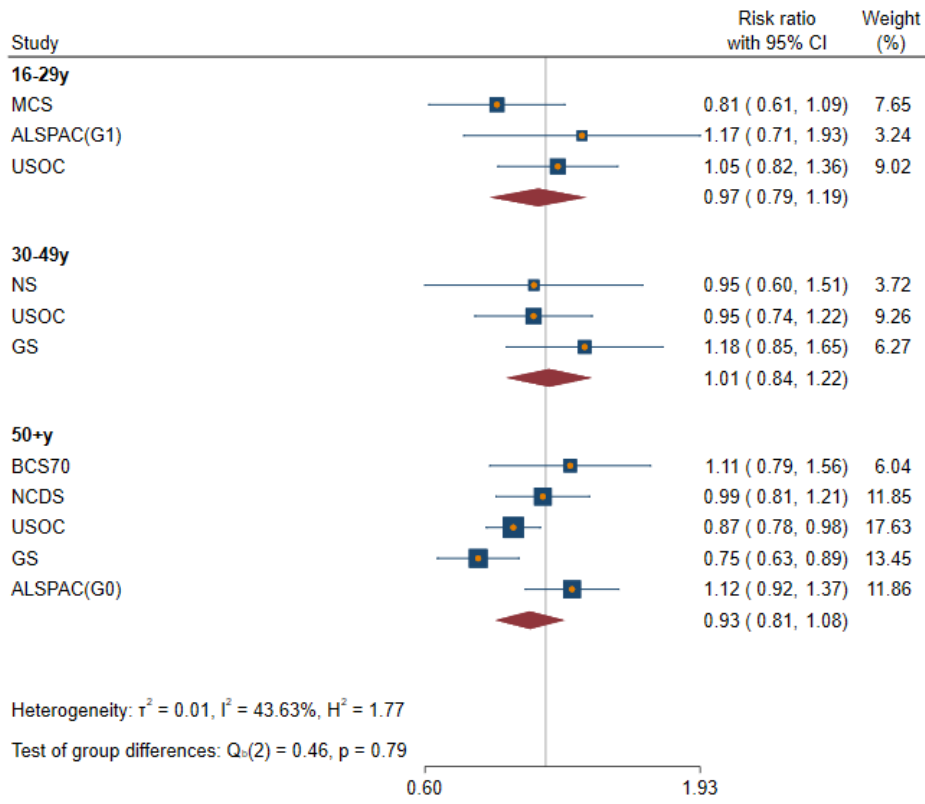

Random-effects REML model

## Figure set 6: More time/ days of physical exercise

Commented [MJ2]:

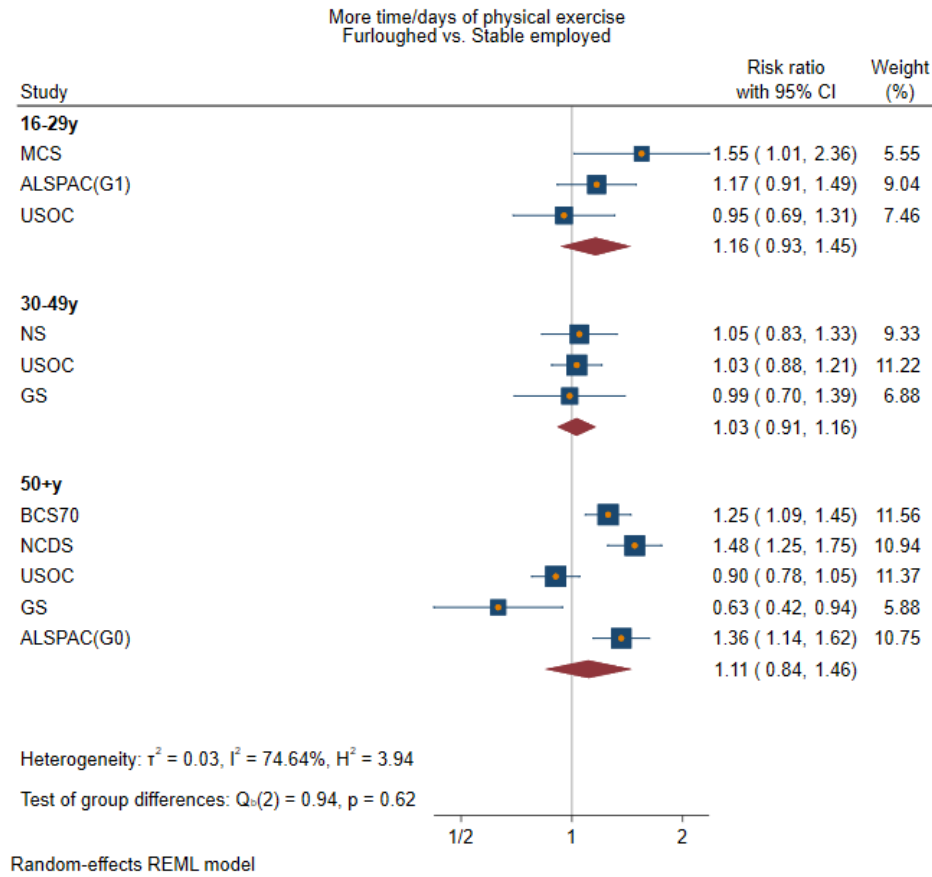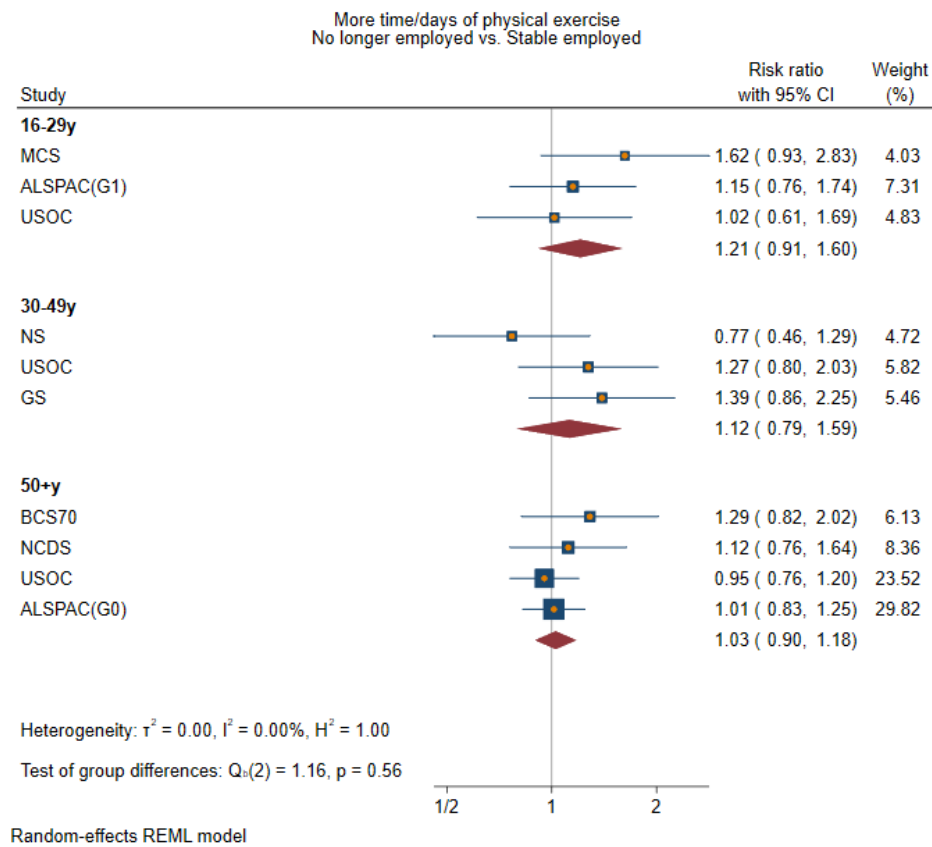

More time/days of physical exercise  
Stable unemployed vs. Stable employed

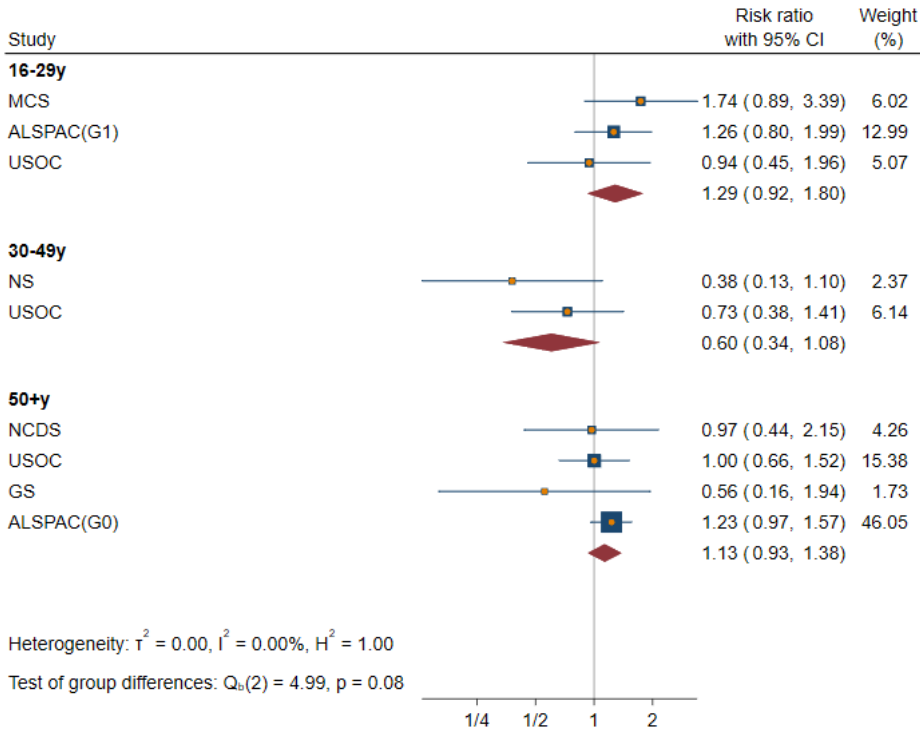

Random-effects REML model

More time/days of physical exercise  
Became employed vs. Stable employed

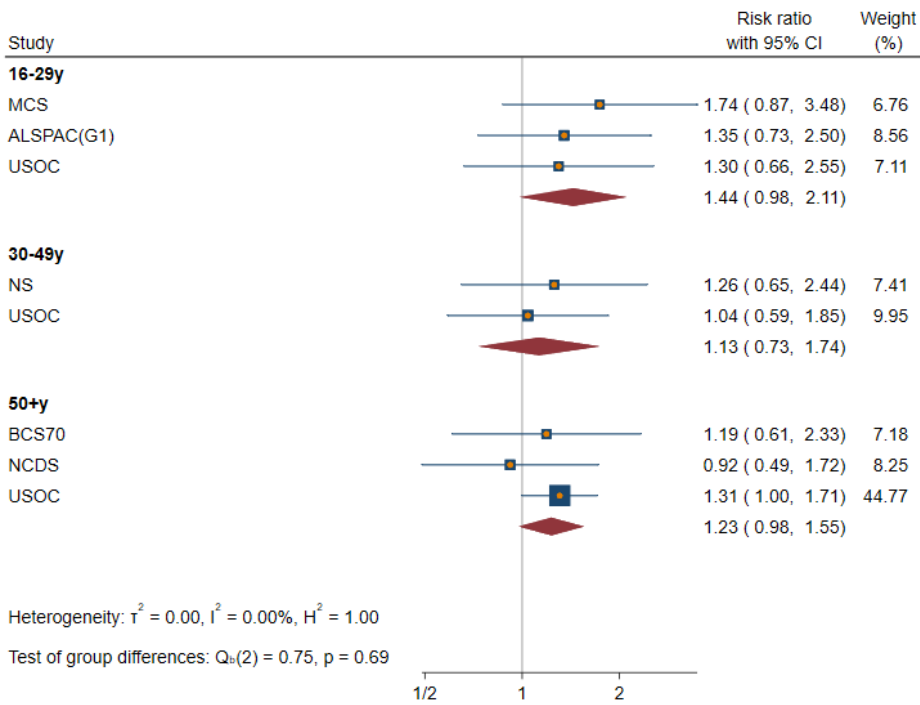

Random-effects REML model

More time/days of physical exercise  
Stable non-employed vs. Stable employed

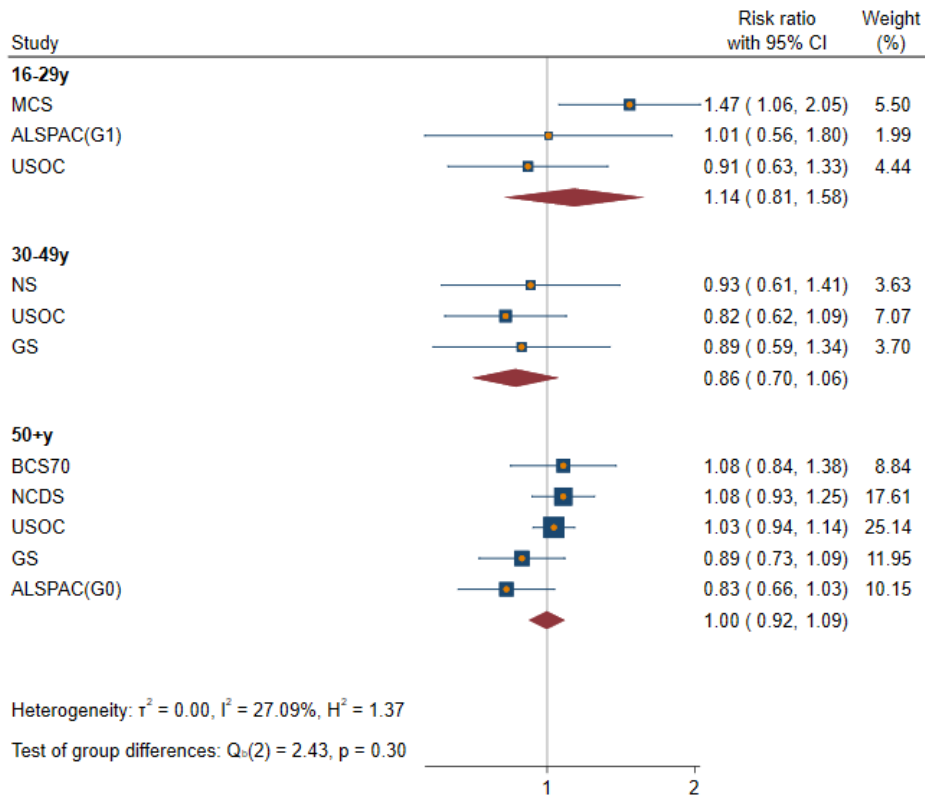

Random-effects REML model



**Figure set 7: Sleeps outside 'Normal Range' (i.e. <6 or 9+ hours)**

Sleeps outside 'Normal Range' (i.e. <6 or 9+ hours)  
Furloughed vs. Stable employed

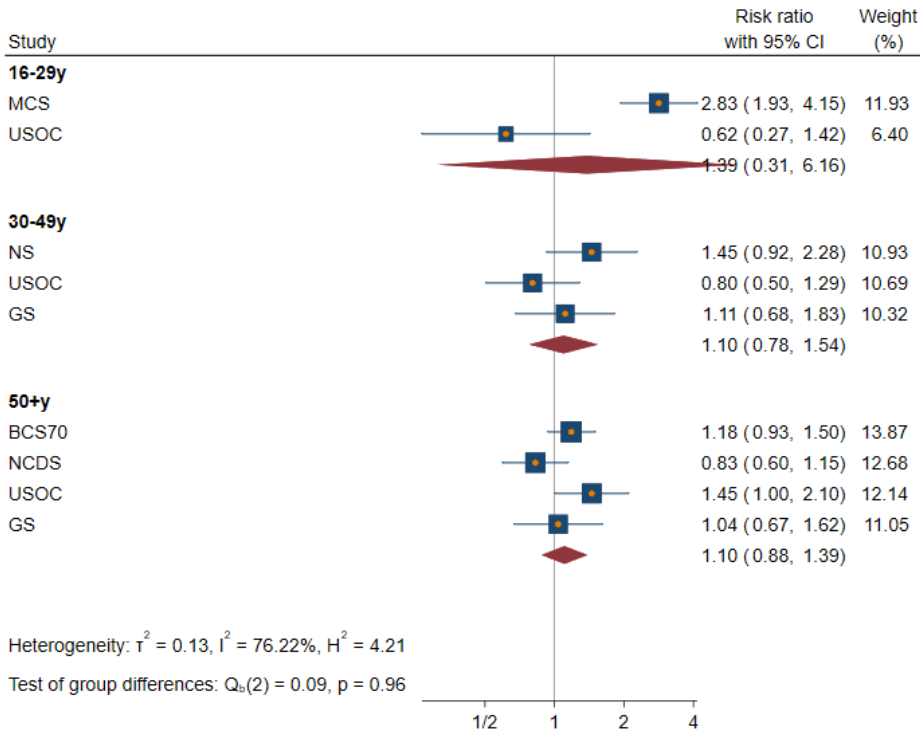

Random-effects REML model

Sleeps outside 'Normal Range' (i.e. <6 or 9+ hours)  
No longer employed vs. Stable employed

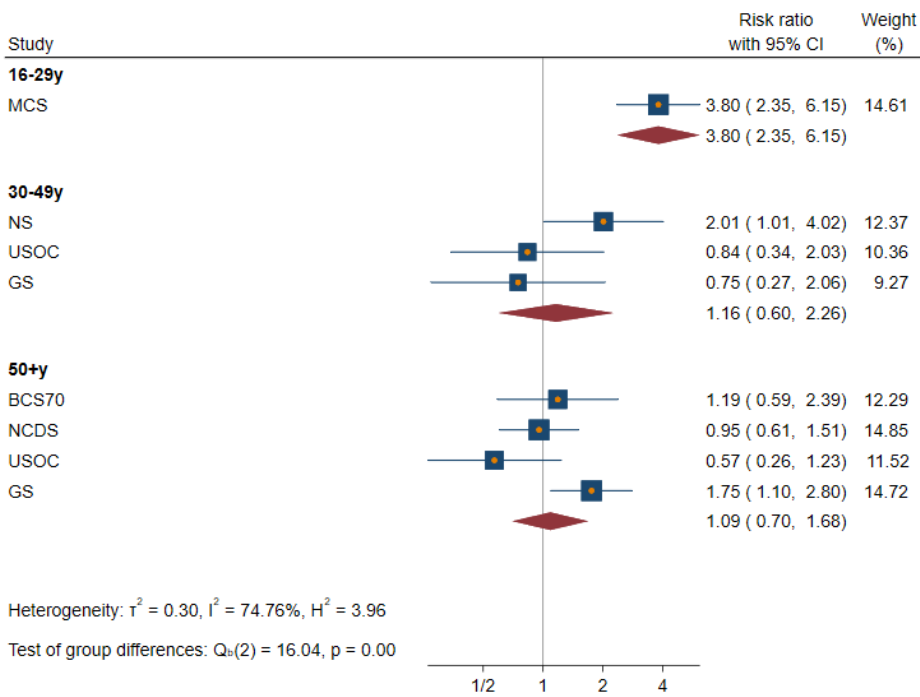

Random-effects REML model

Sleeps outside 'Normal Range' (i.e. <6 or 9+ hours)  
Stable unemployed vs. Stable employed

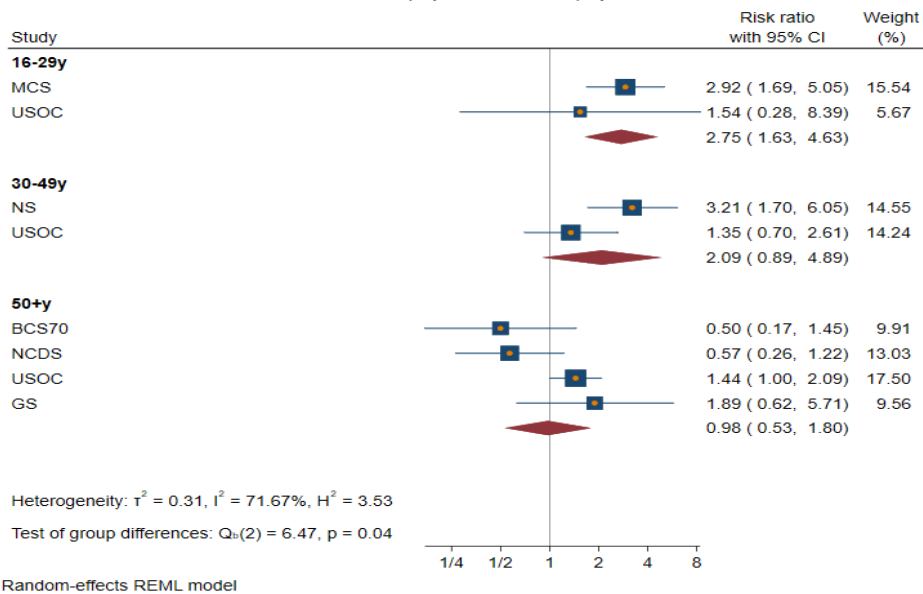

Random-effects REML model

Sleeps outside 'Normal Range' (i.e. <6 or 9+ hours)  
Became employed vs. Stable employed

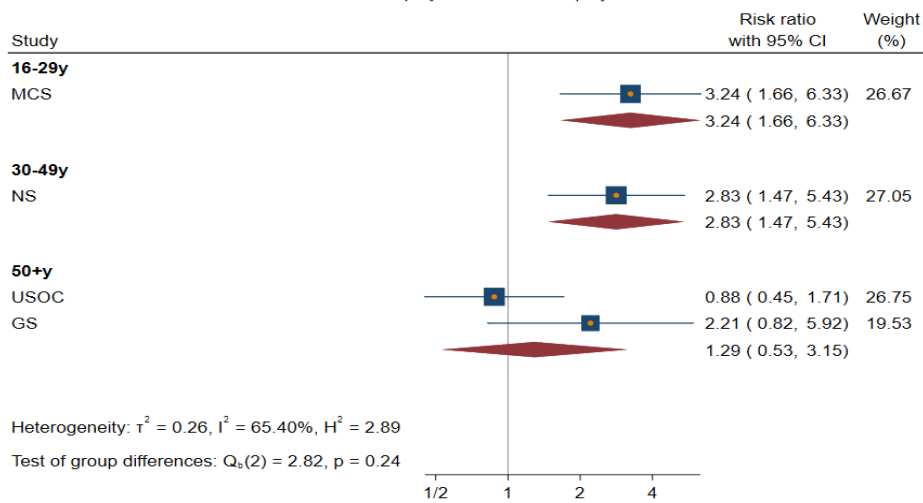

Random-effects REML model

Sleeps outside 'Normal Range' (i.e. <6 or 9+ hours)  
Stable non-employed vs. Stable employed

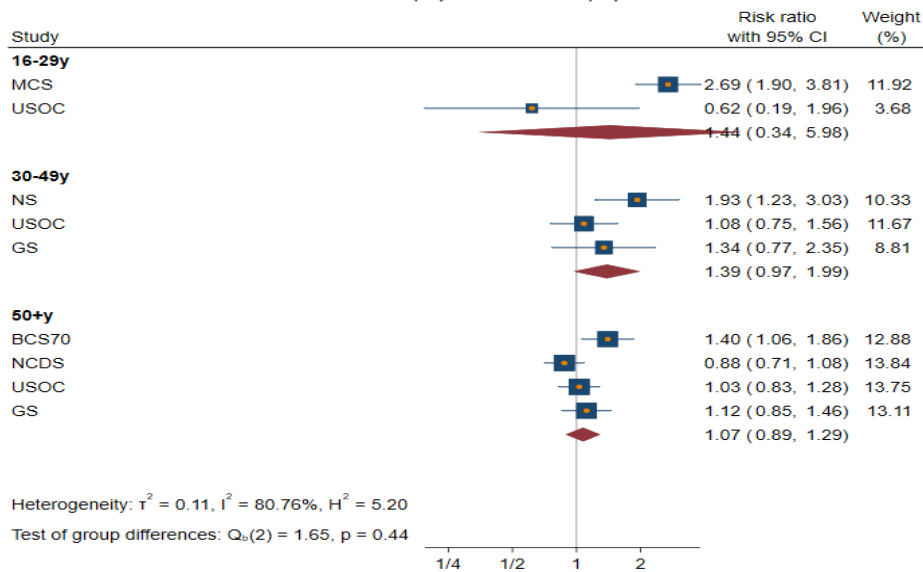

Random-effects REML model

Figure set 8: Sleeps less than before

Commented [MJ3]:

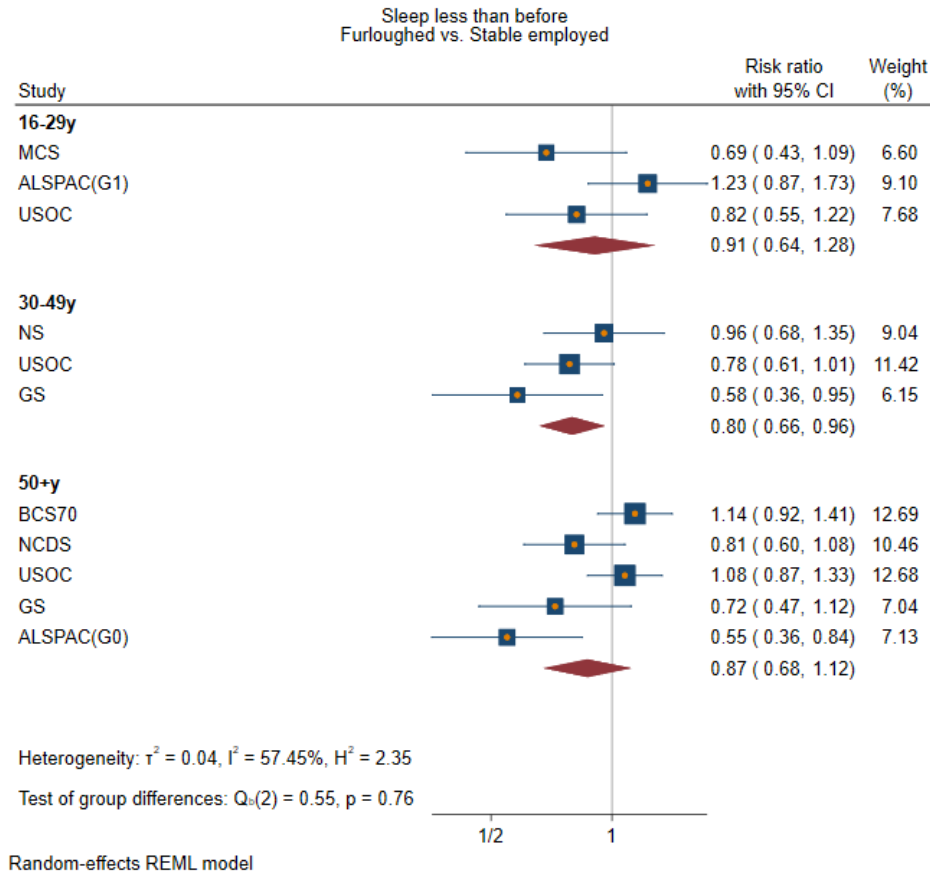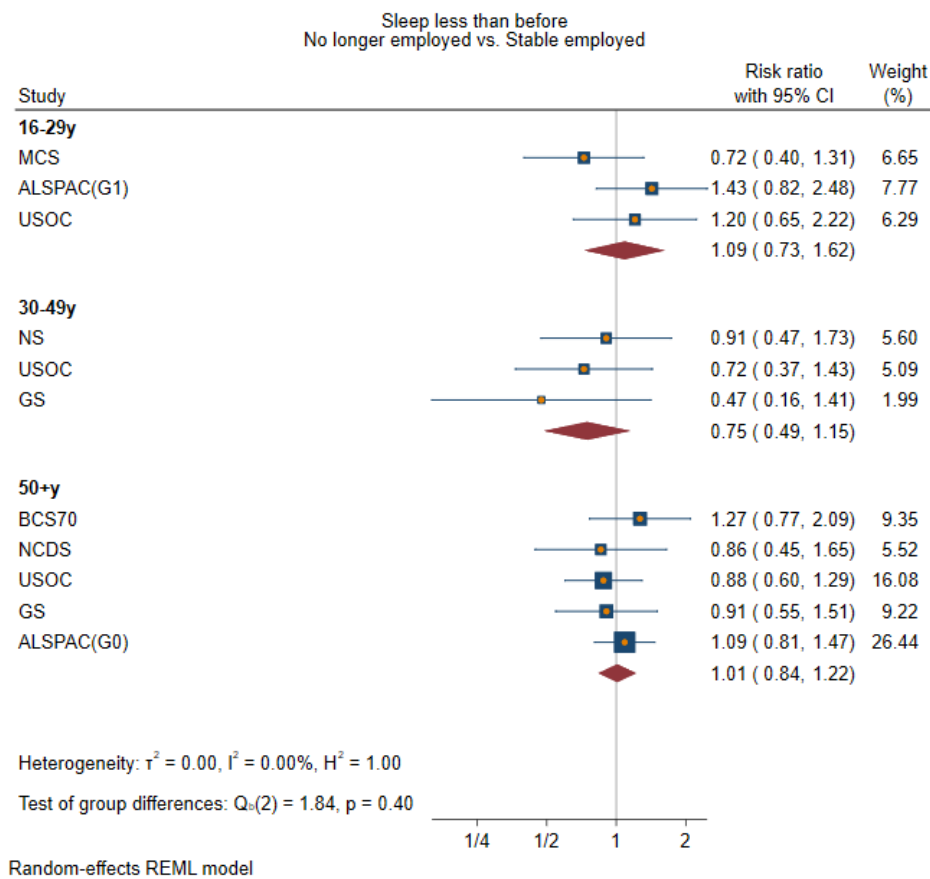

Sleep less than before  
Stable unemployed vs. Stable employed

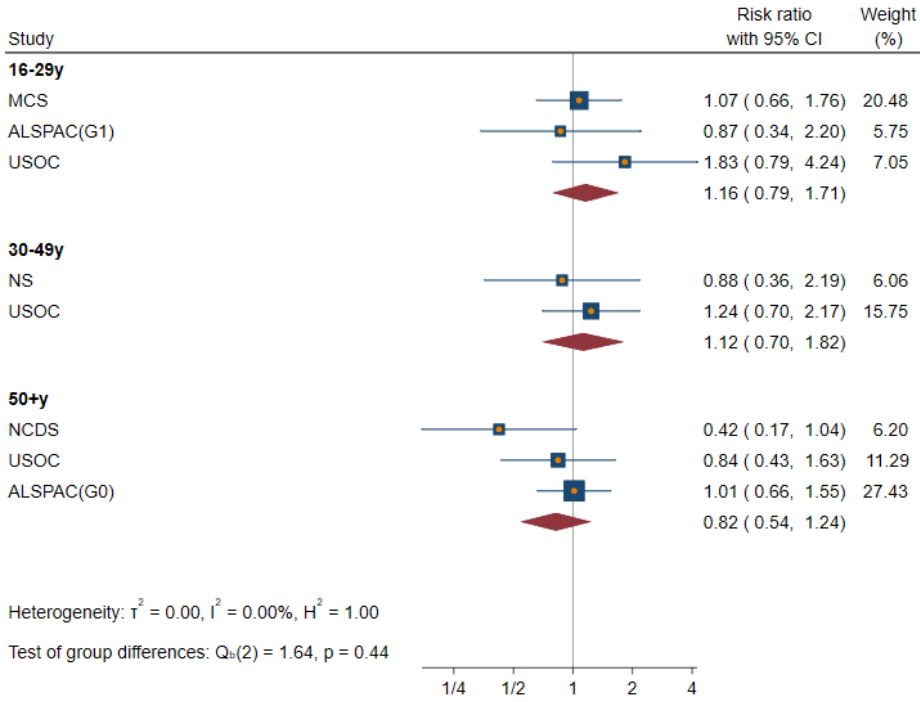

Random-effects REML model

Sleep less than before  
Became employed vs. Stable employed

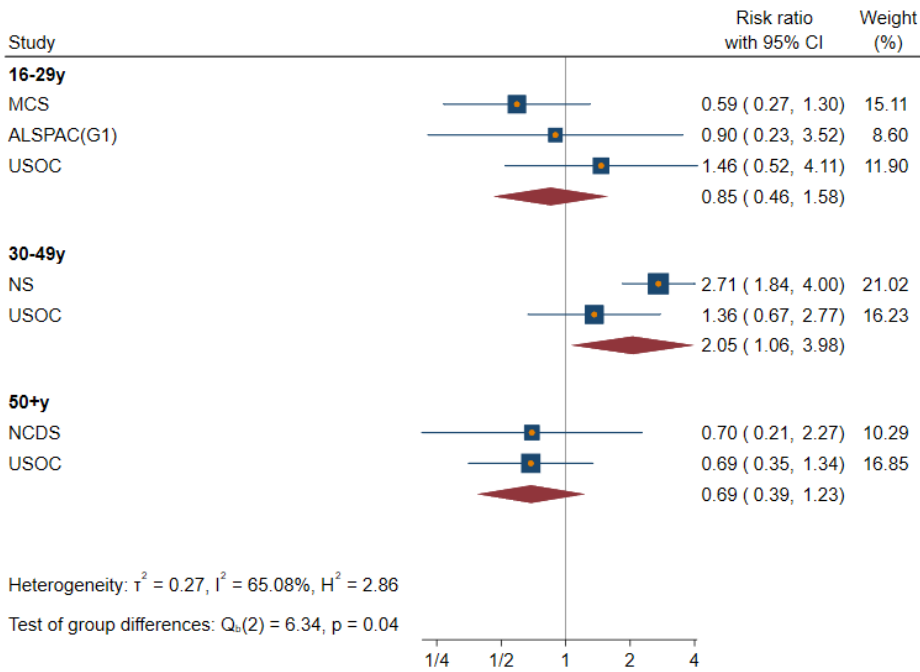

Random-effects REML model

Sleep less than before  
Stable non-employed vs. Stable employed

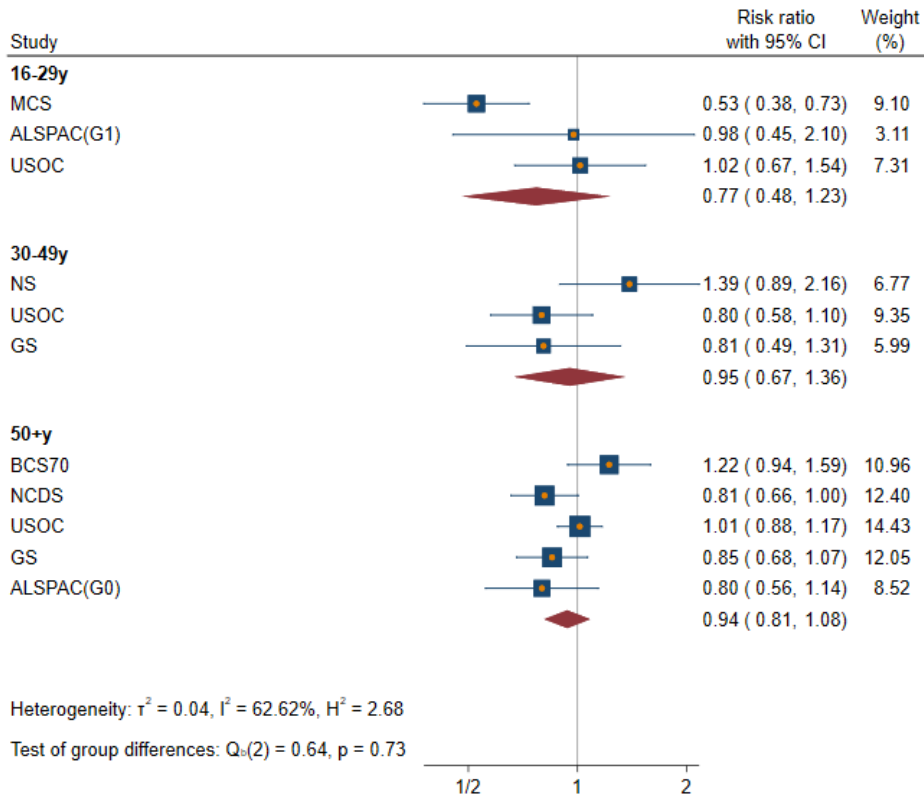

Random-effects REML model

**Figure set 9: Sleeps less than before**

Commented [MJ4]:

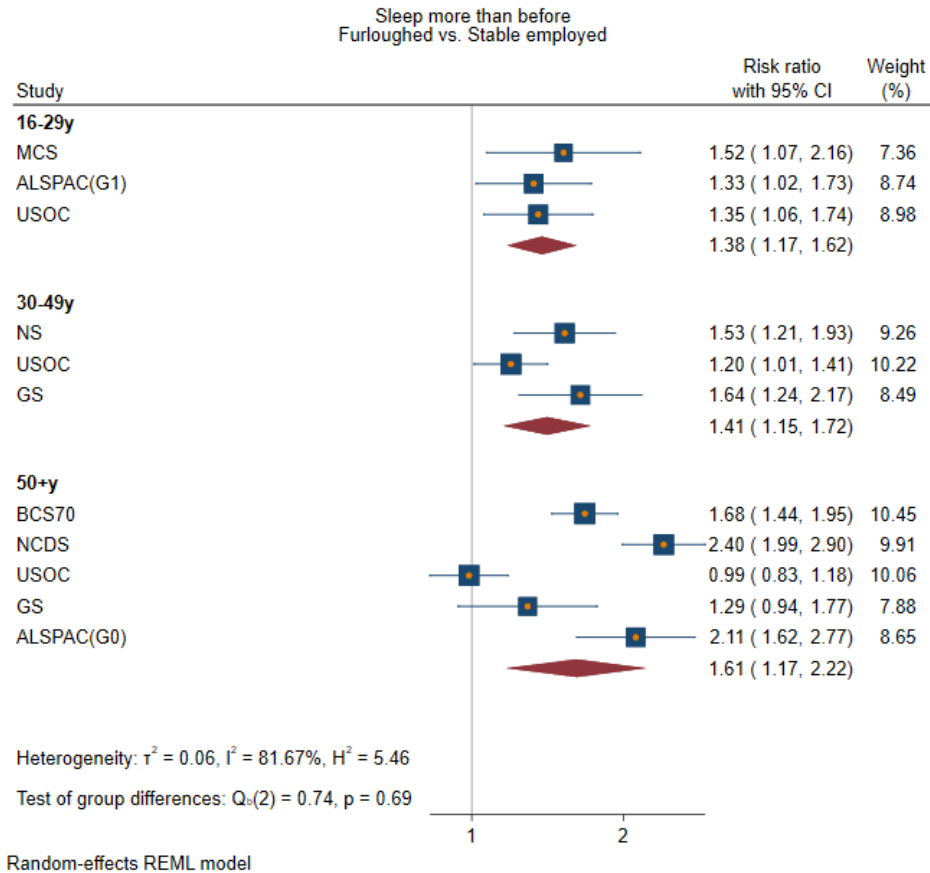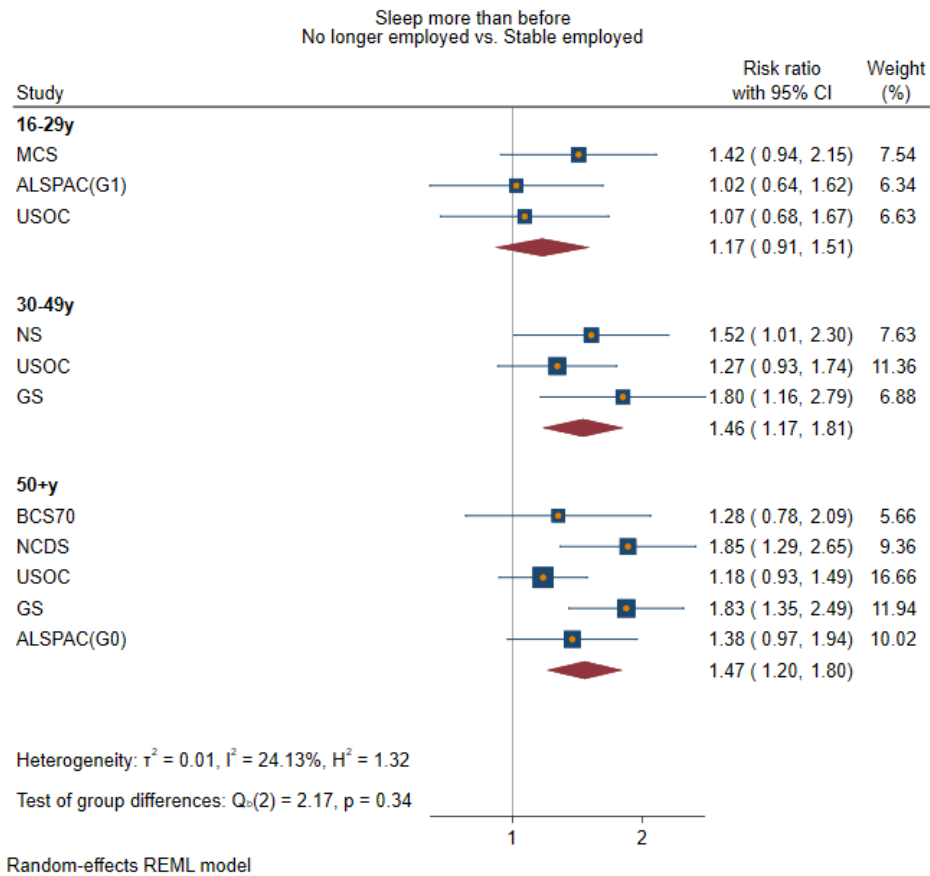

Sleep more than before  
Stable unemployed vs. Stable employed

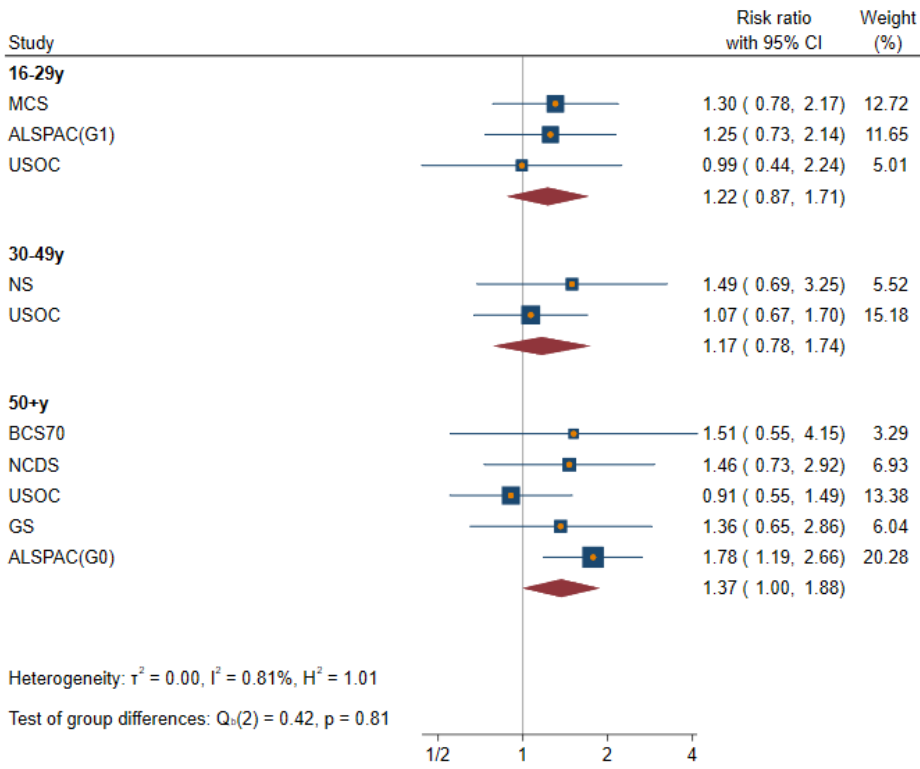

Random-effects REML model

Sleep more than before  
Became employed vs. Stable employed

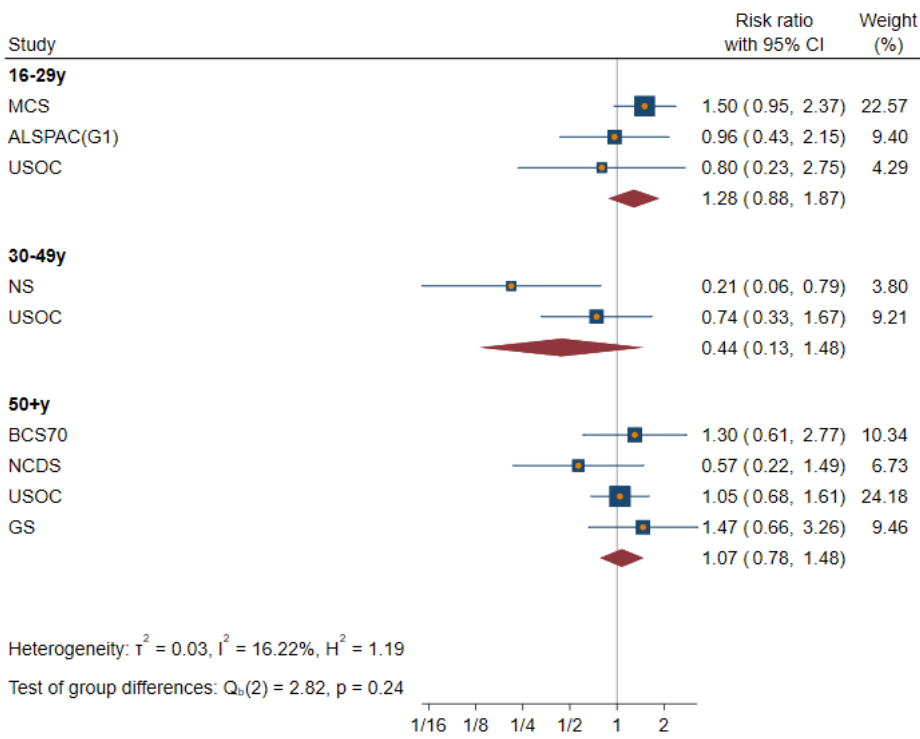

Random-effects REML model

Sleep more than before  
Stable non-employed vs. Stable employed

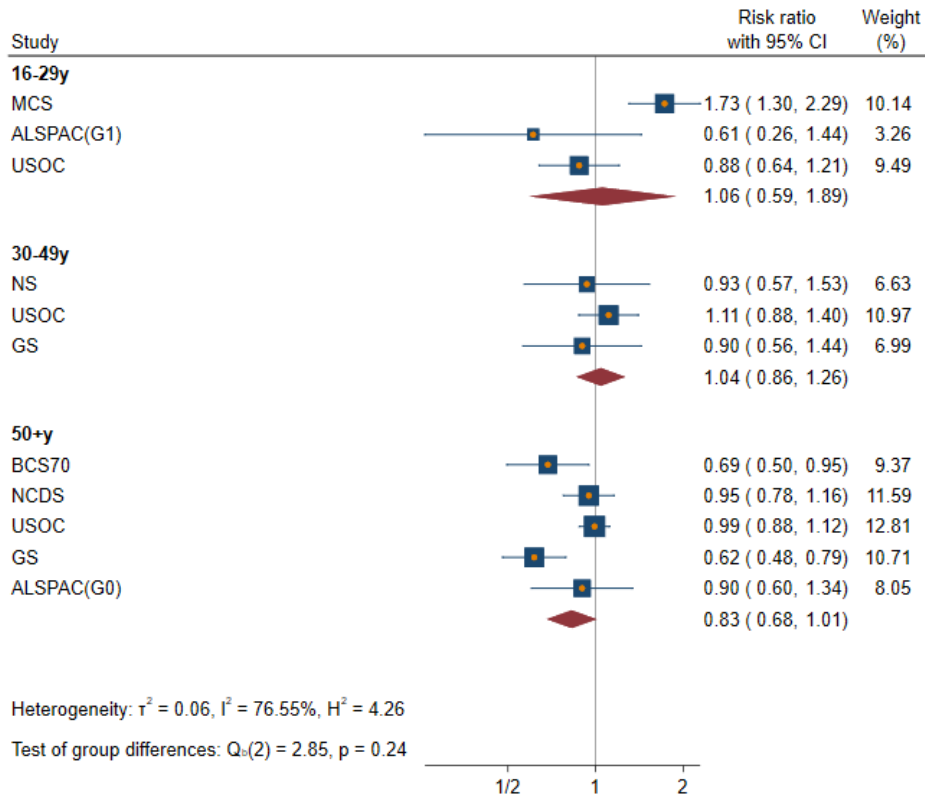



**Figure set 10: From 6/9h a night to outside 'normal range'**

From 6/9h a night to outside 'normal range'  
Furloughed vs. Stable employed

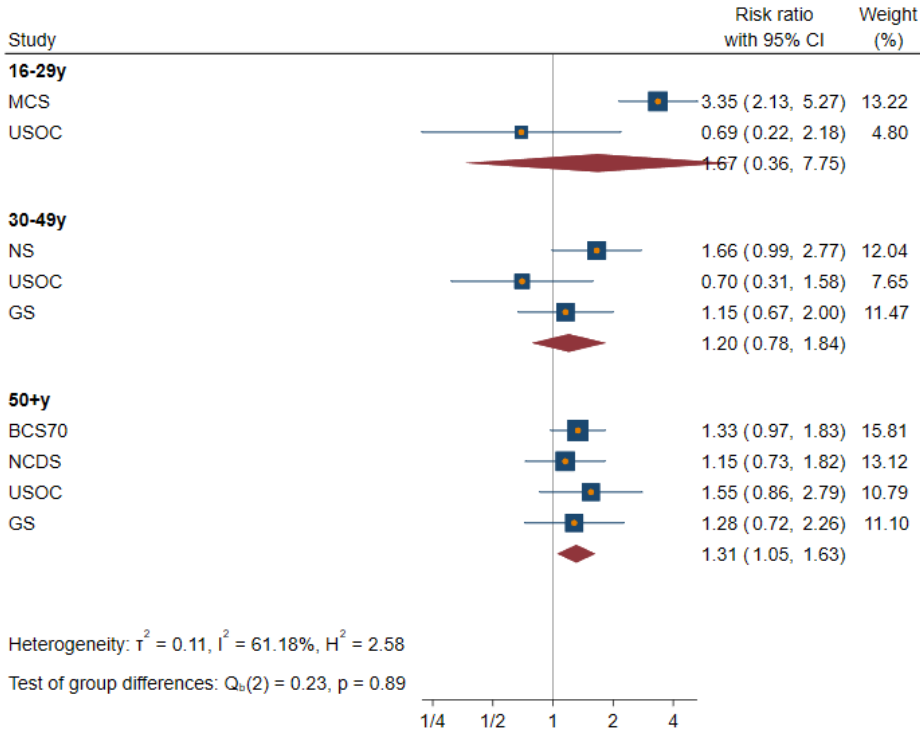

From 6/9h a night to outside 'normal range'  
No longer employed vs. Stable employed

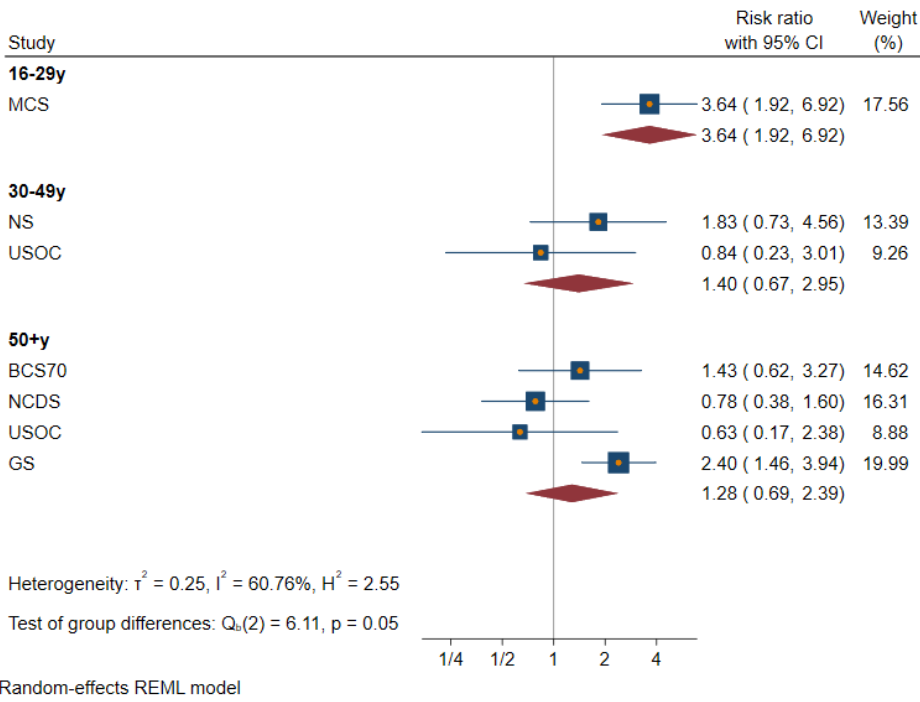

From 6/9h a night to outside 'normal range  
Stable unemployed vs. Stable employed

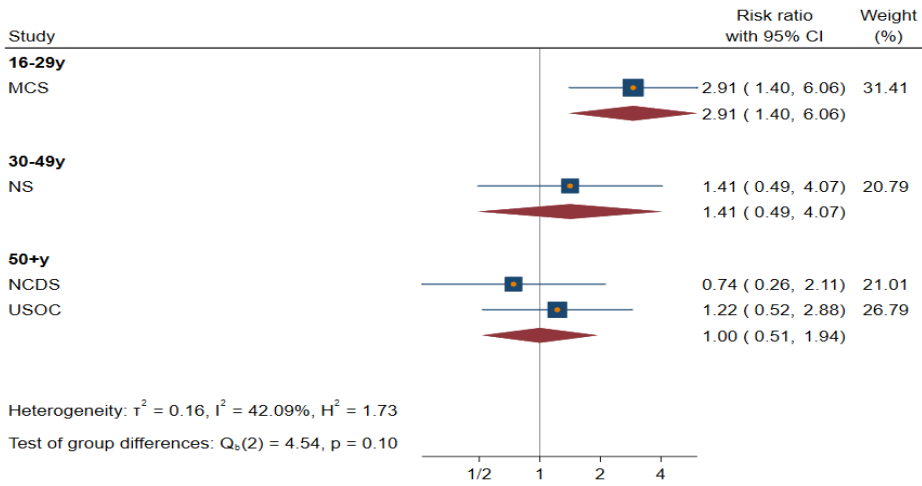

Random-effects REML model

From 6/9h a night to outside 'normal range  
Became employed vs. Stable employed

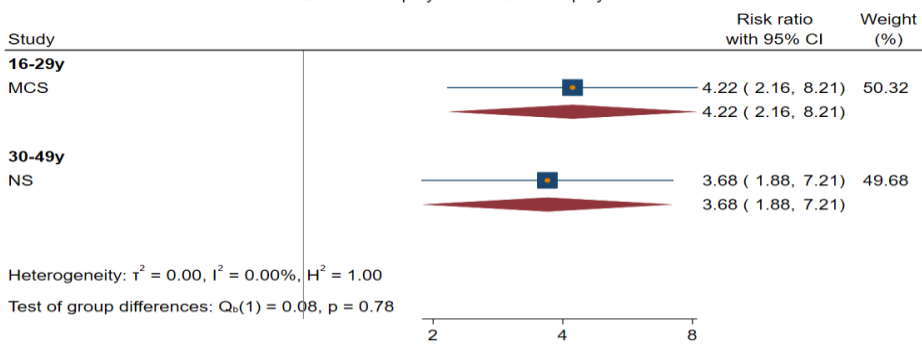

Random-effects REML model

From 6/9h a night to outside 'normal range  
Stable non-employed vs. Stable employed

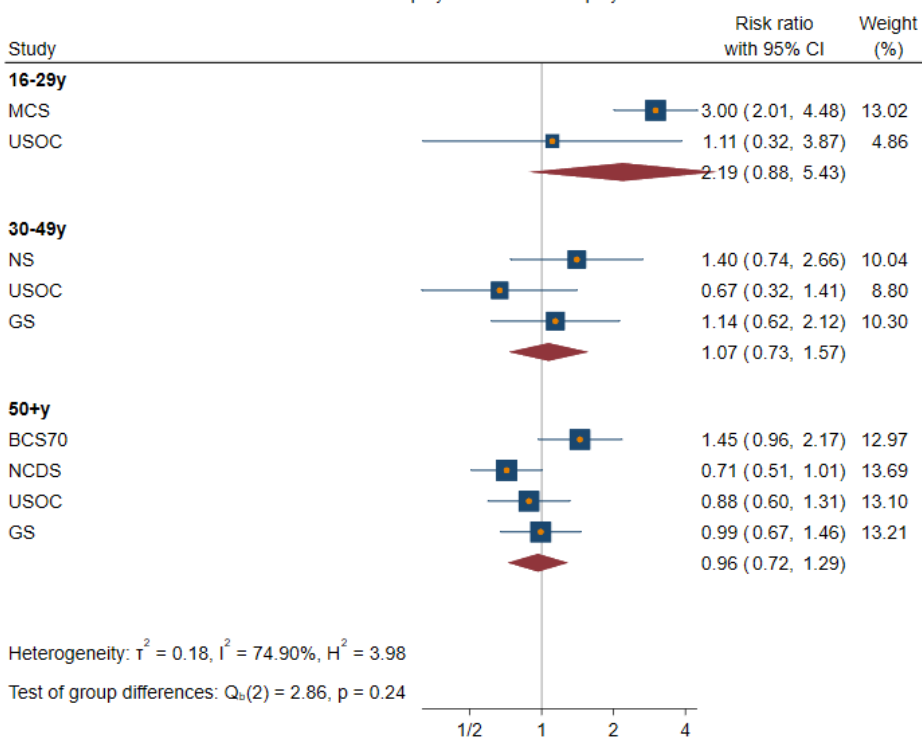

Random-effects REML model

**Figure set 11: From outside 'normal range' to 6/9h a night**

From outside 'normal range' to 6/9h a night  
Furloughed vs. Stable employed

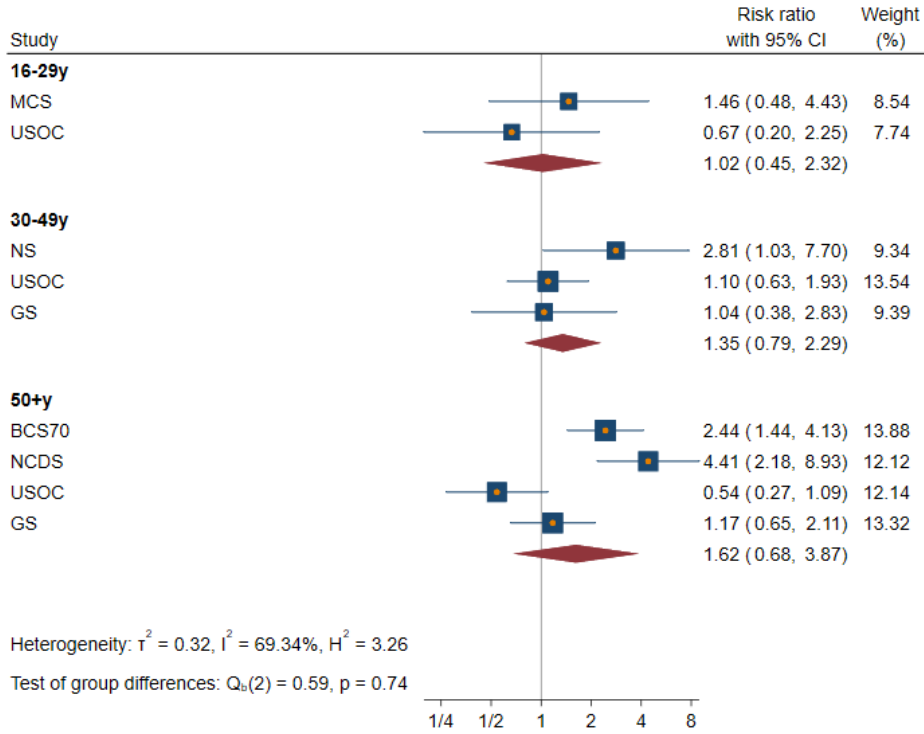

From outside 'normal range' to 6/9h a night  
No longer employed vs. Stable employed

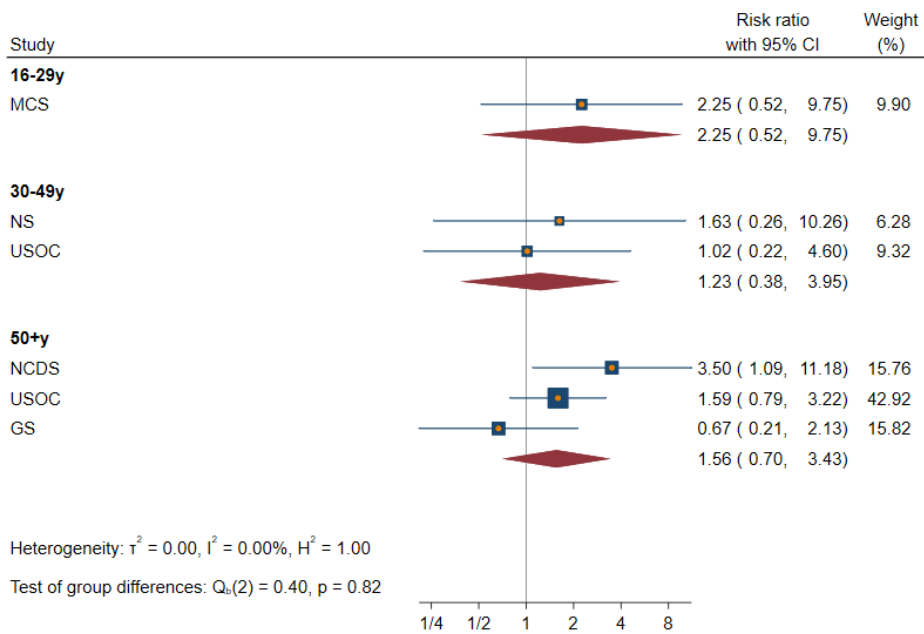

From outside 'normal range' to 6/9h a night  
Stable unemployed vs. Stable employed

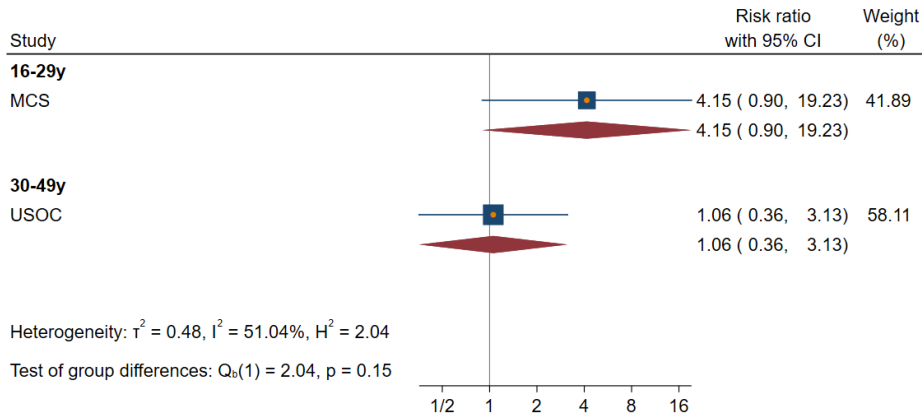

Random-effects REML model

From outside 'normal range' to 6/9h a night  
Became employed vs. Stable employed

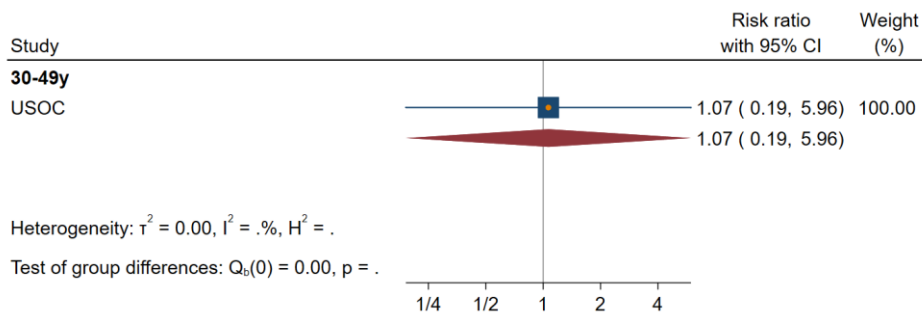

Random-effects REML model

From outside 'normal range' to 6/9h a night  
Stable non-employed vs. Stable employed

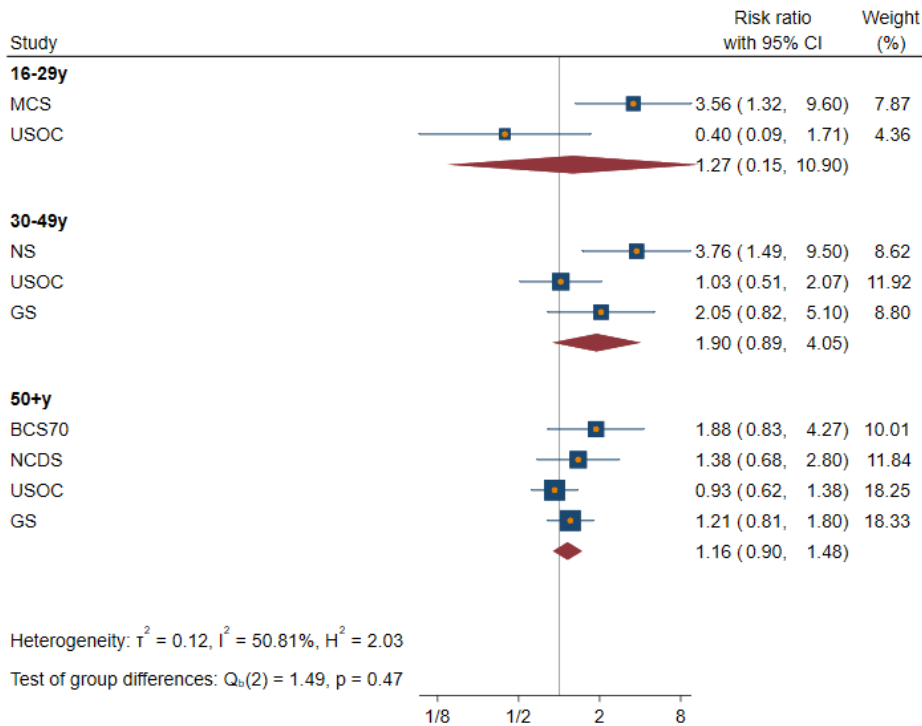

Random-effects REML model

**Figure set 12: Currently eats 2 or fewer fruit and veg**

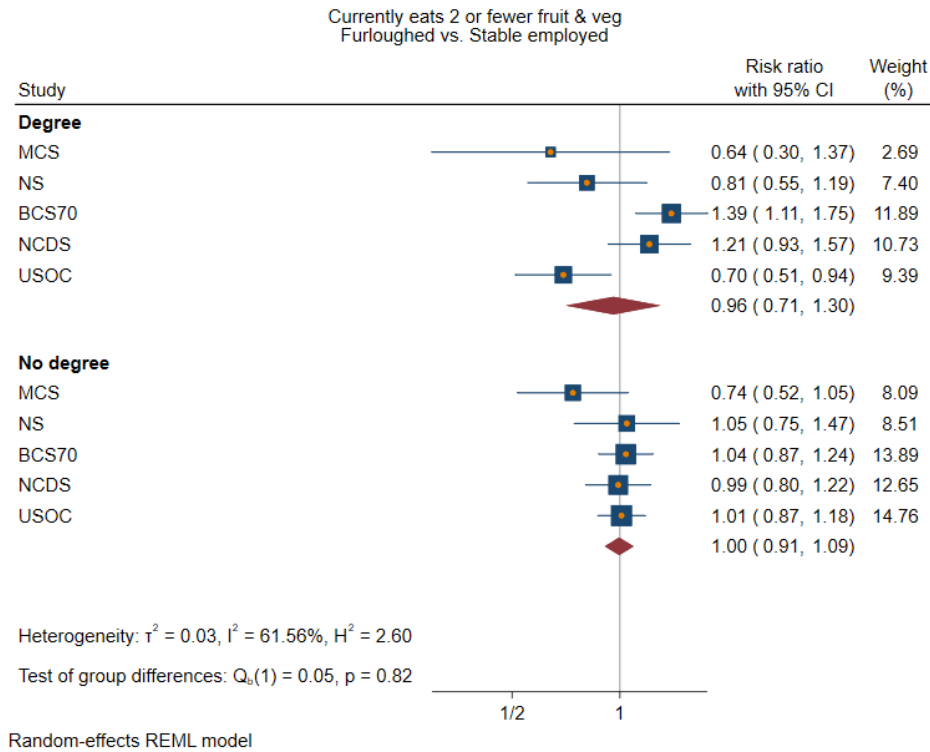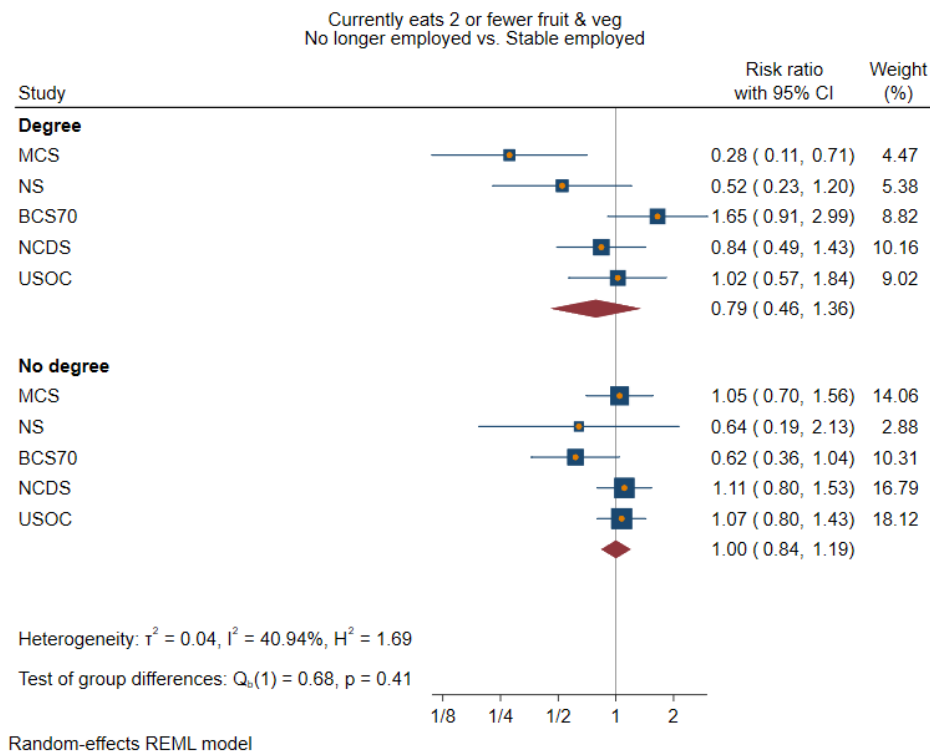

Currently eats 2 or fewer fruit & veg  
Stable unemployed vs. Stable employed

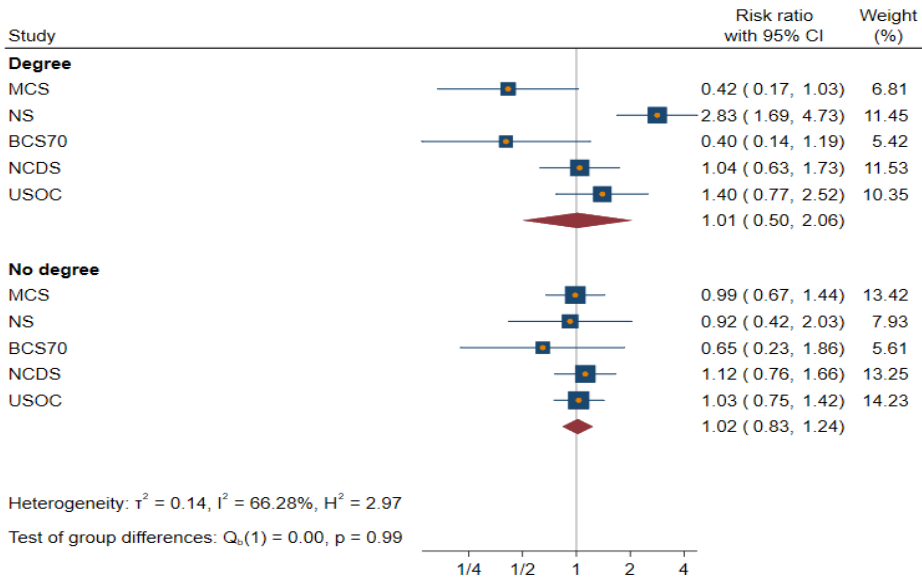

Random-effects REML model

Currently eats 2 or fewer fruit & veg  
Became employed vs. Stable employed

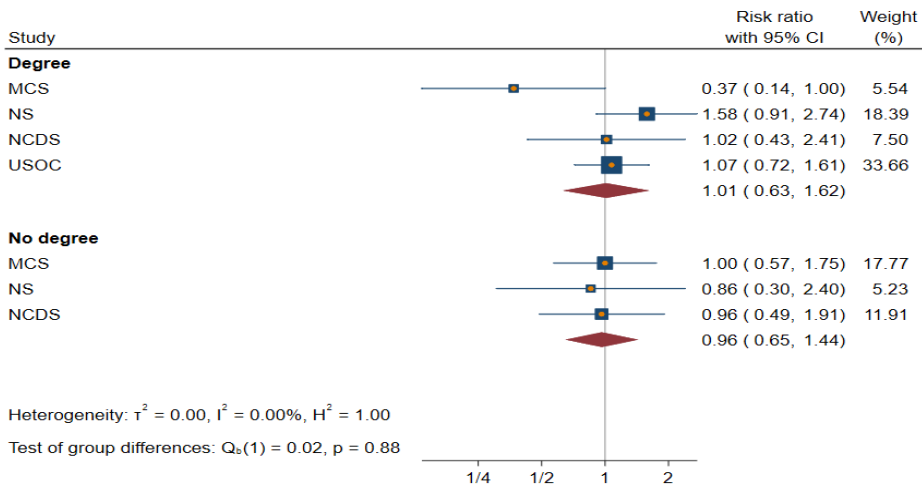

Random-effects REML model

Currently eats 2 or fewer fruit & veg  
Stable non-employed vs. Stable employed

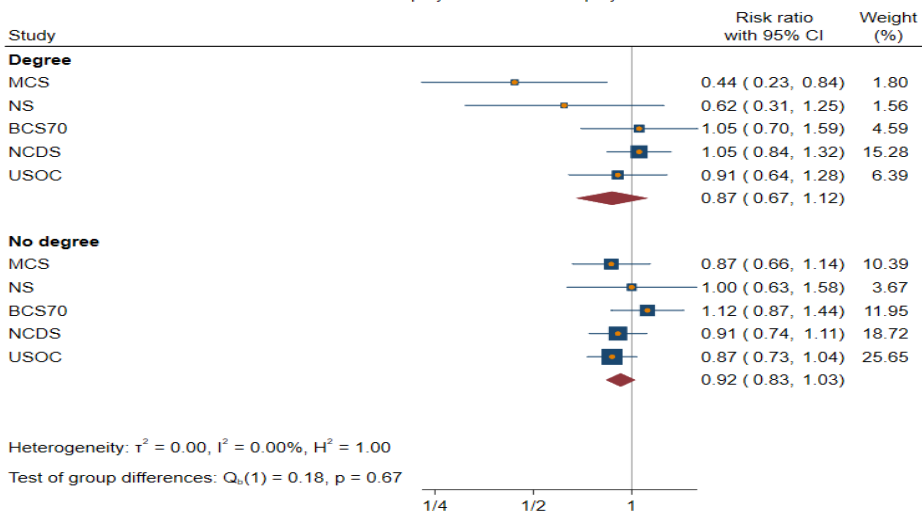

Random-effects REML model

**Figure set 13: Fewer fruit and veg**

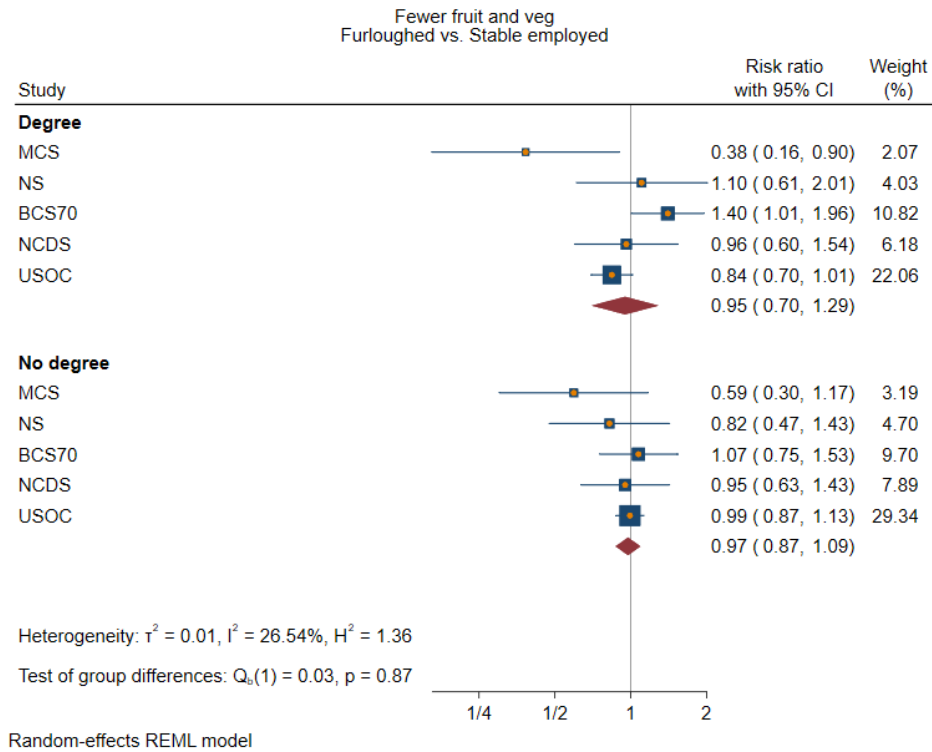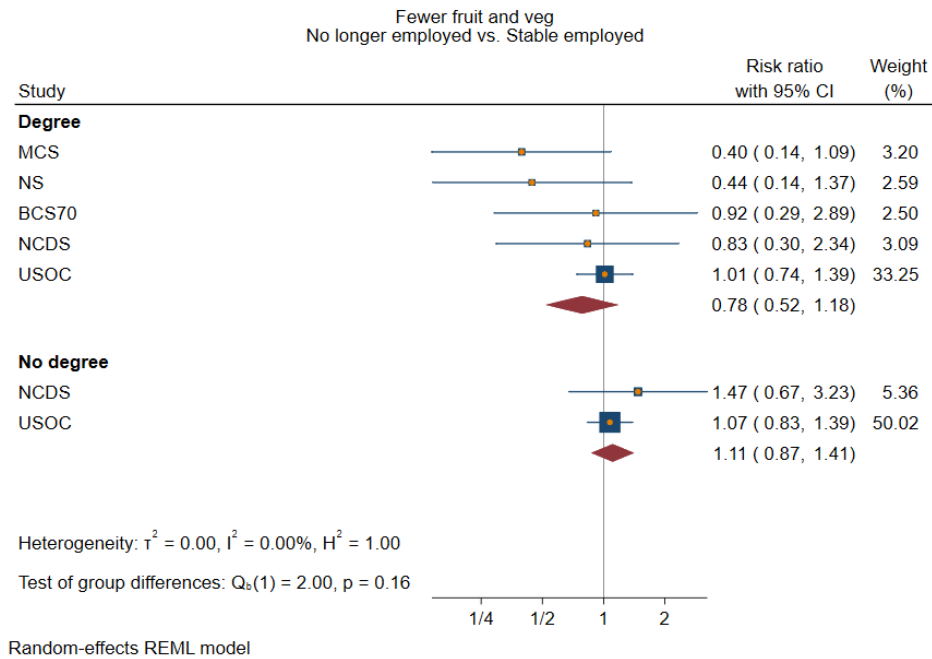

Fewer fruit and veg  
Stable unemployed vs. Stable employed

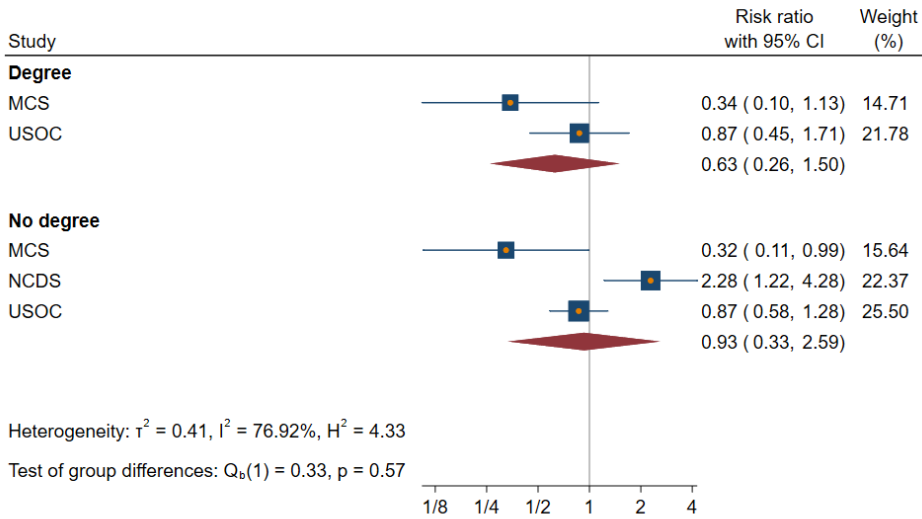

Random-effects REML model

Fewer fruit and veg  
Became employed vs. Stable employed

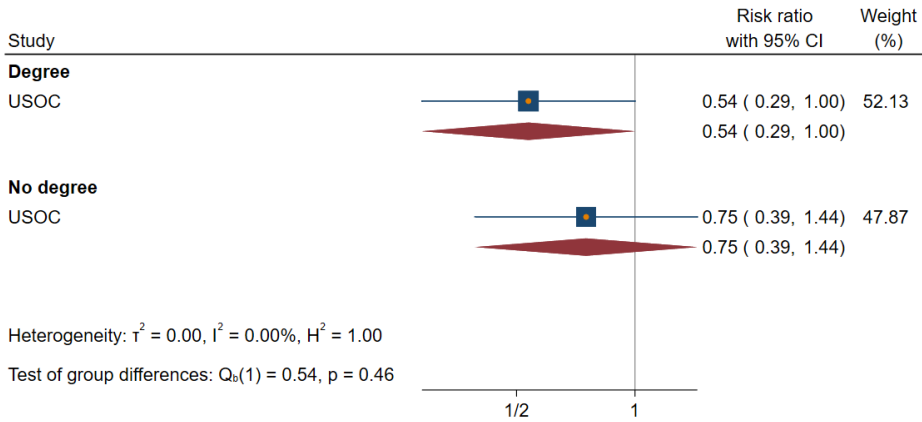

Random-effects REML model

Fewer fruit and veg  
Stable non-employed vs. Stable employed

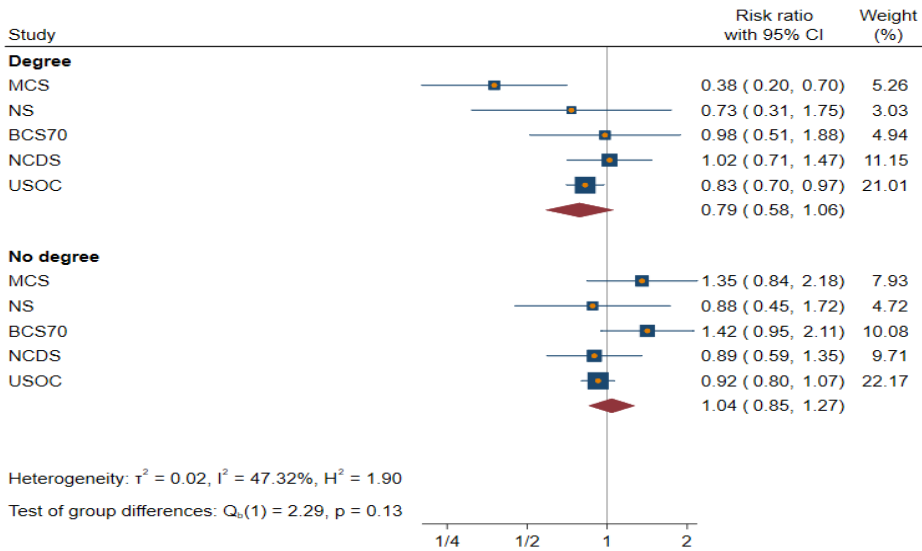

Random-effects REML model



**Figure set 14: More fruit and veg**

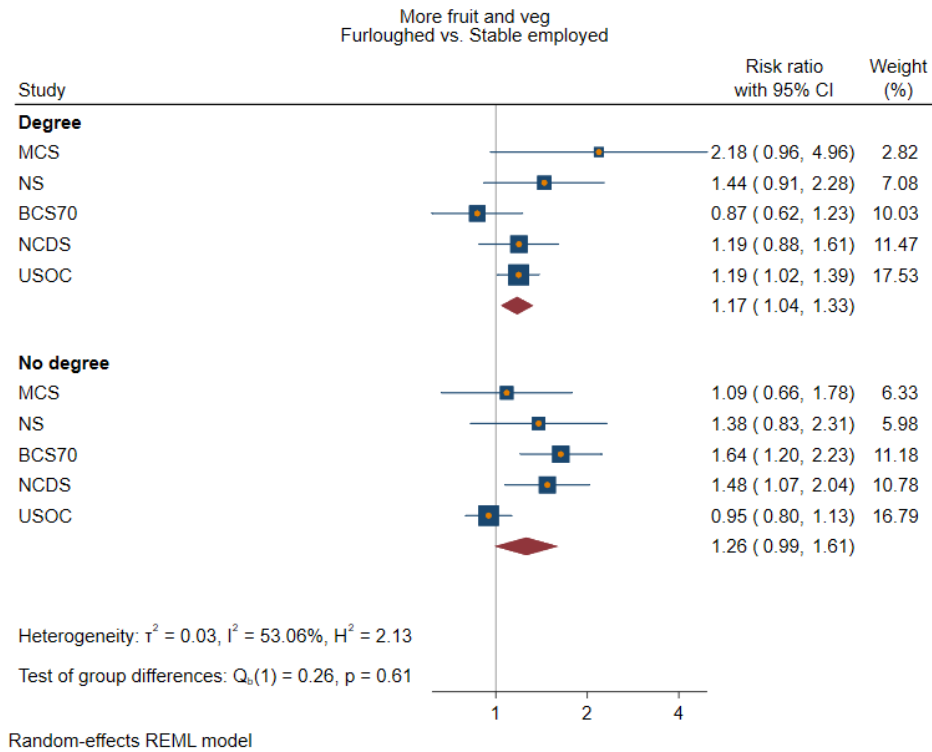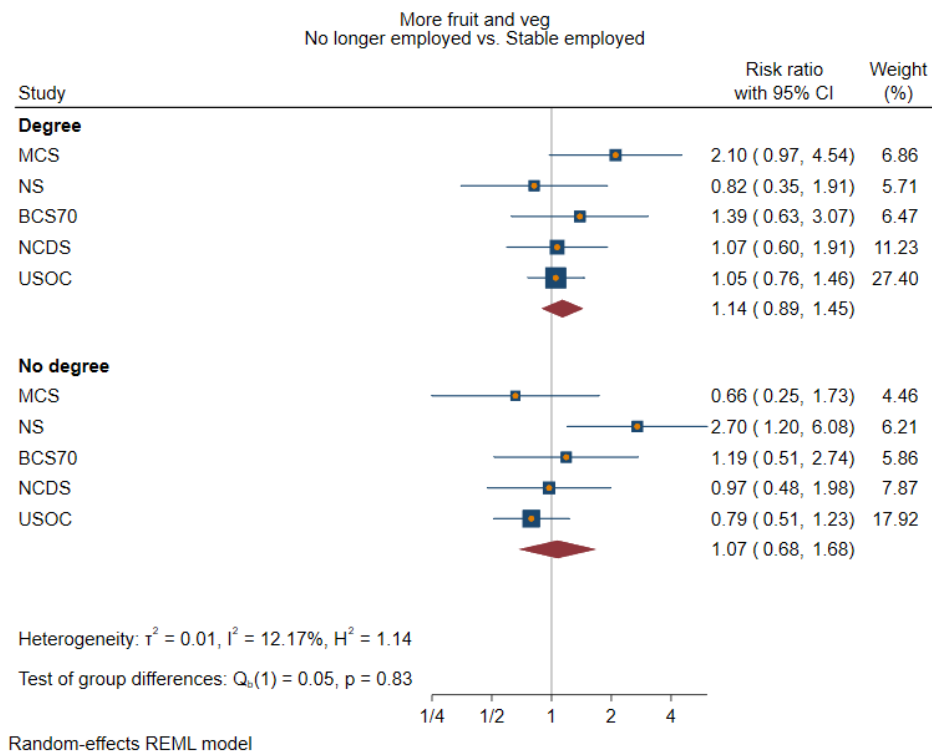

More fruit and veg  
Stable unemployed vs. Stable employed

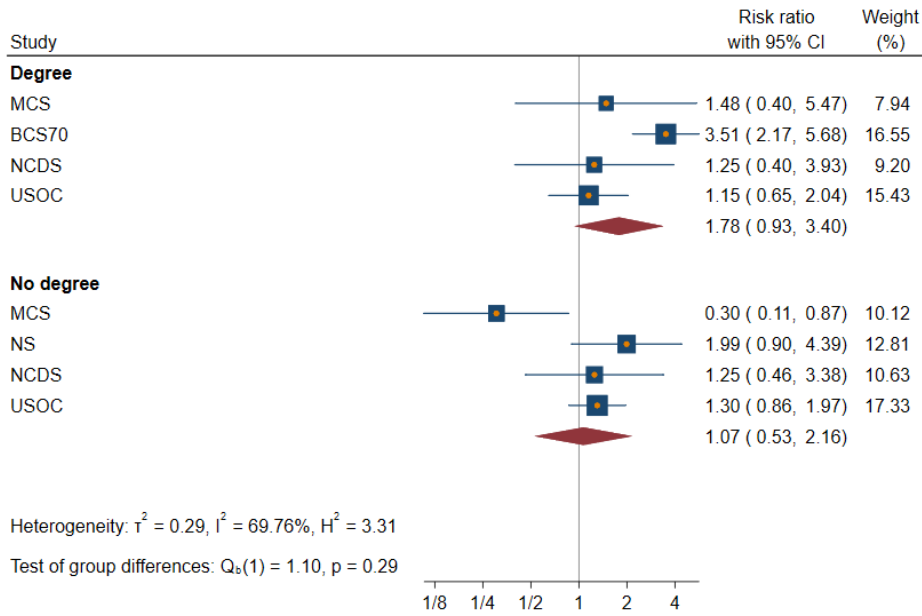

Random-effects REML model

More fruit and veg  
Became employed vs. Stable employed

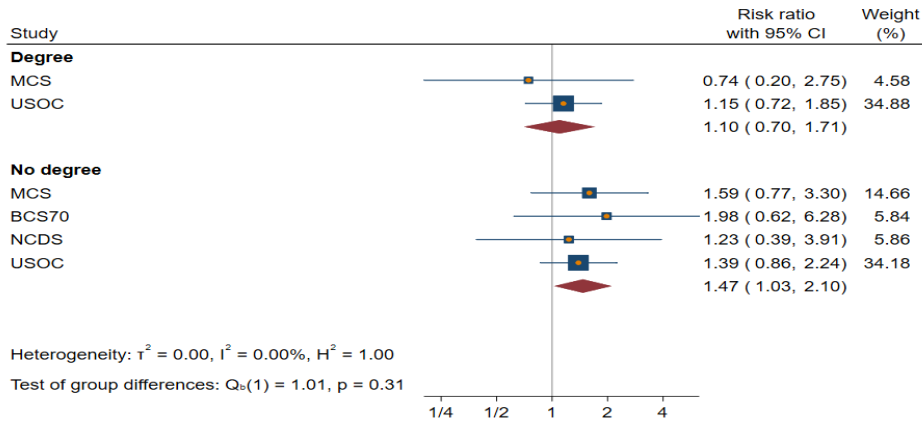

Random-effects REML model

More fruit and veg  
Stable non-employed vs. Stable employed

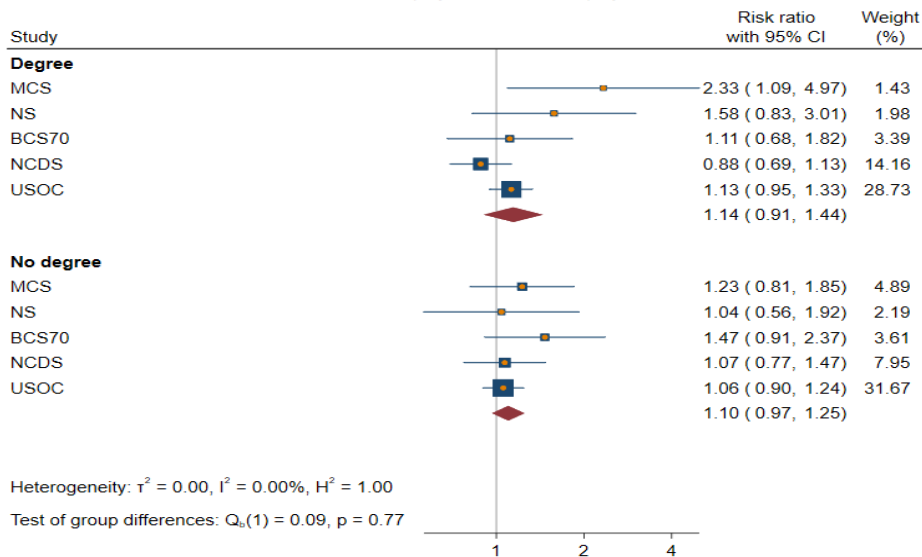

Random-effects REML model

**Figure set 15: Less than 3 days a week of at least 30min exercise**

Less than 3 days a week of at least 30min exercise  
Furloughed vs. Stable employed

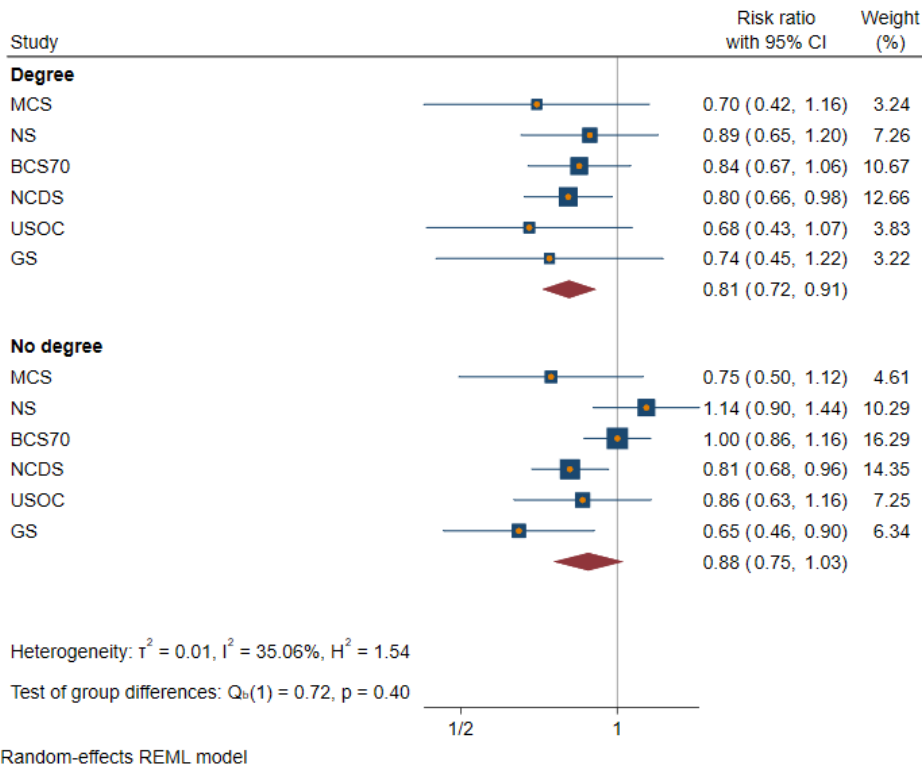

Less than 3 days a week of at least 30min exercise  
No longer employed vs. Stable employed

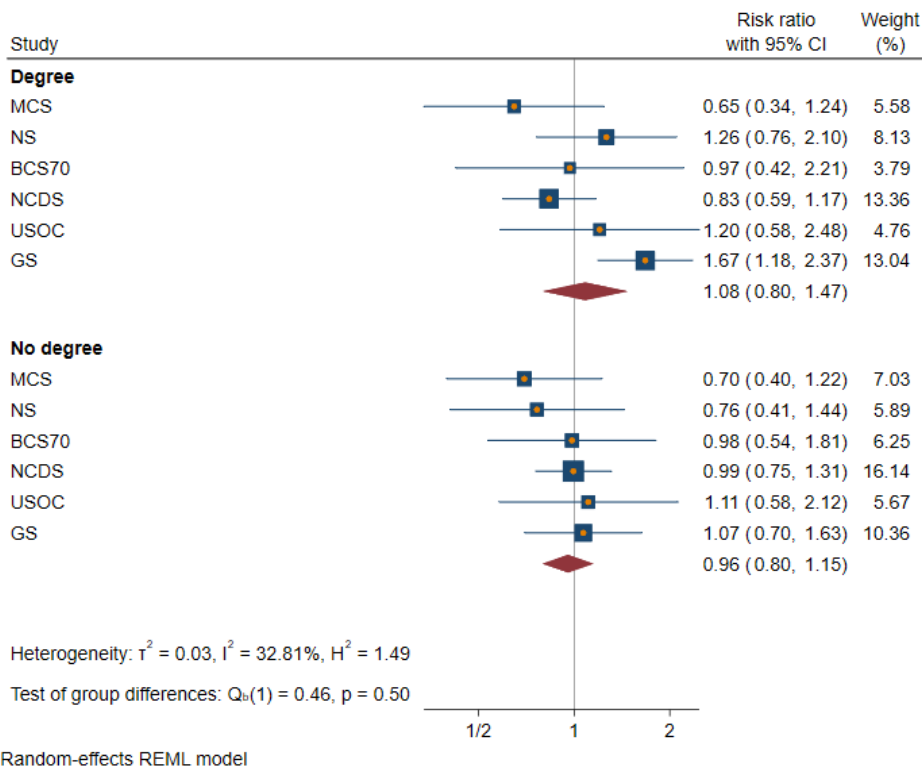

Less than 3 days a week of at least 30min exercise  
Stable unemployed vs. Stable employed

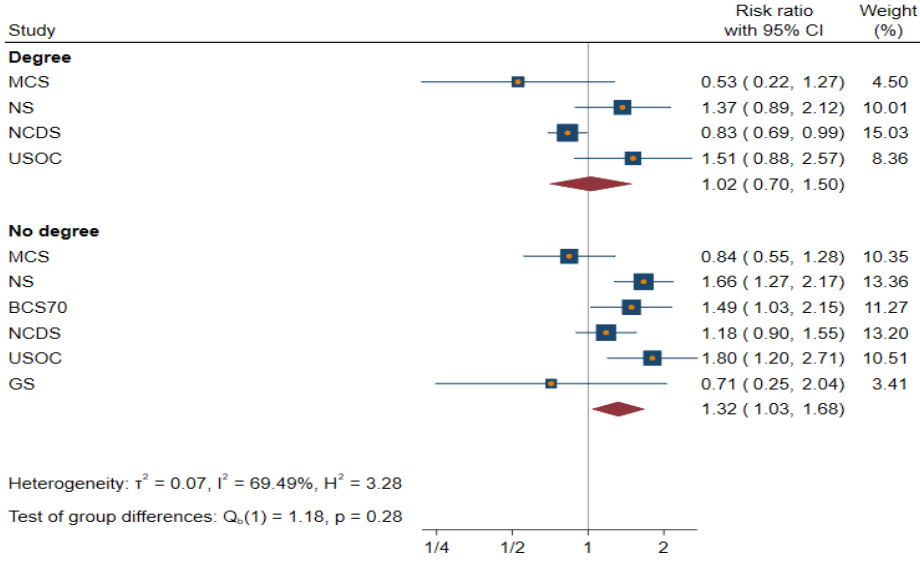

Random-effects REML model

Less than 3 days a week of at least 30min exercise  
Became employed vs. Stable employed

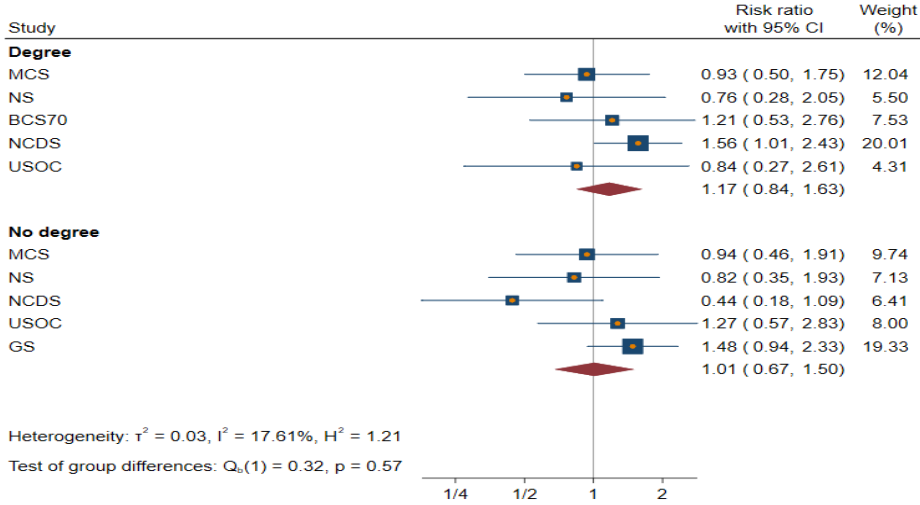

Random-effects REML model

Less than 3 days a week of at least 30min exercise  
Stable non-employed vs. Stable employed

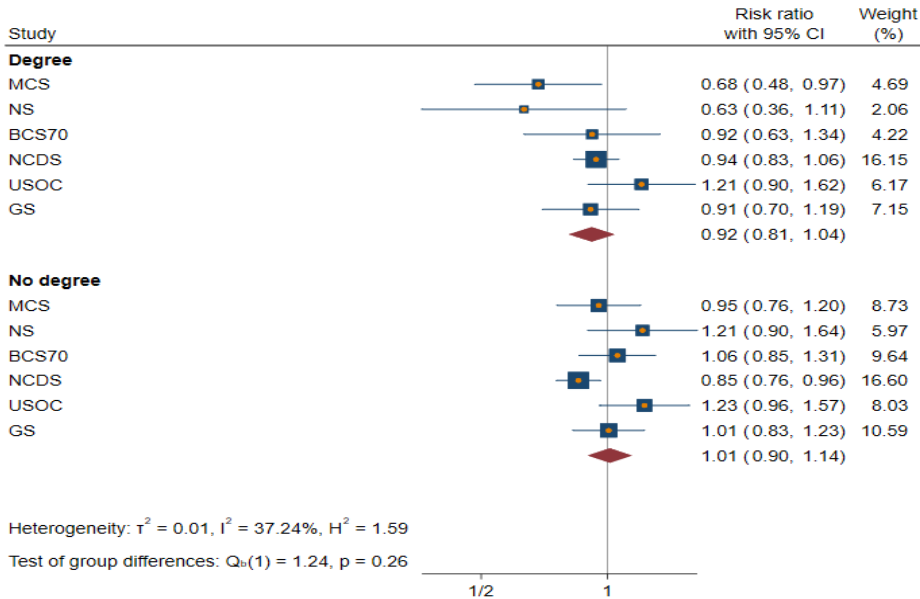

Random-effects REML model

Figure set 16: Less time/ fewer days of physical exercise

Commented [MJ5]:

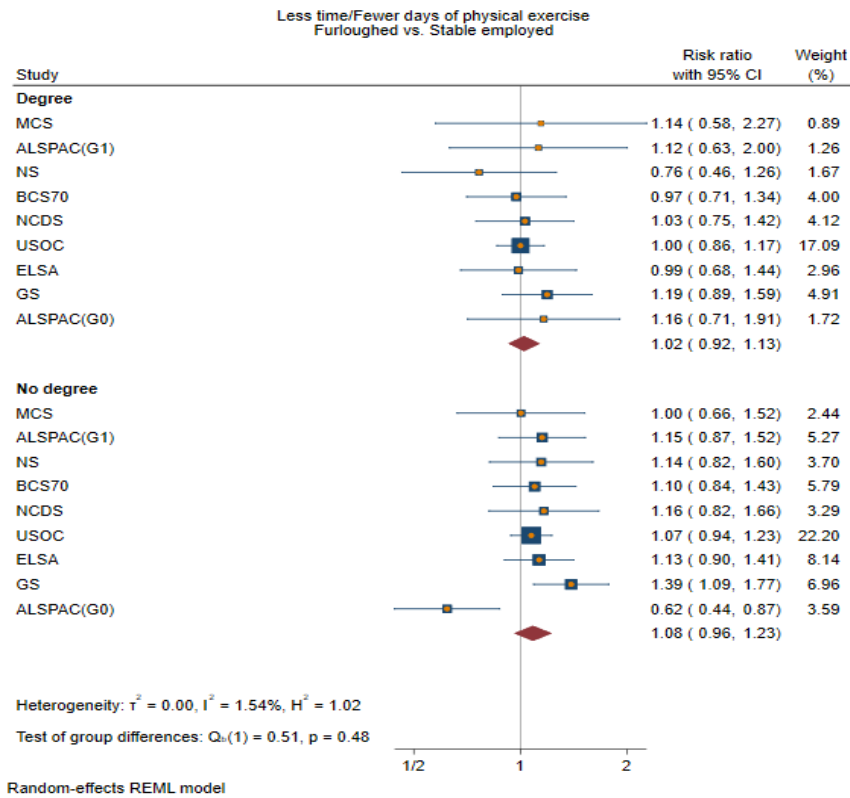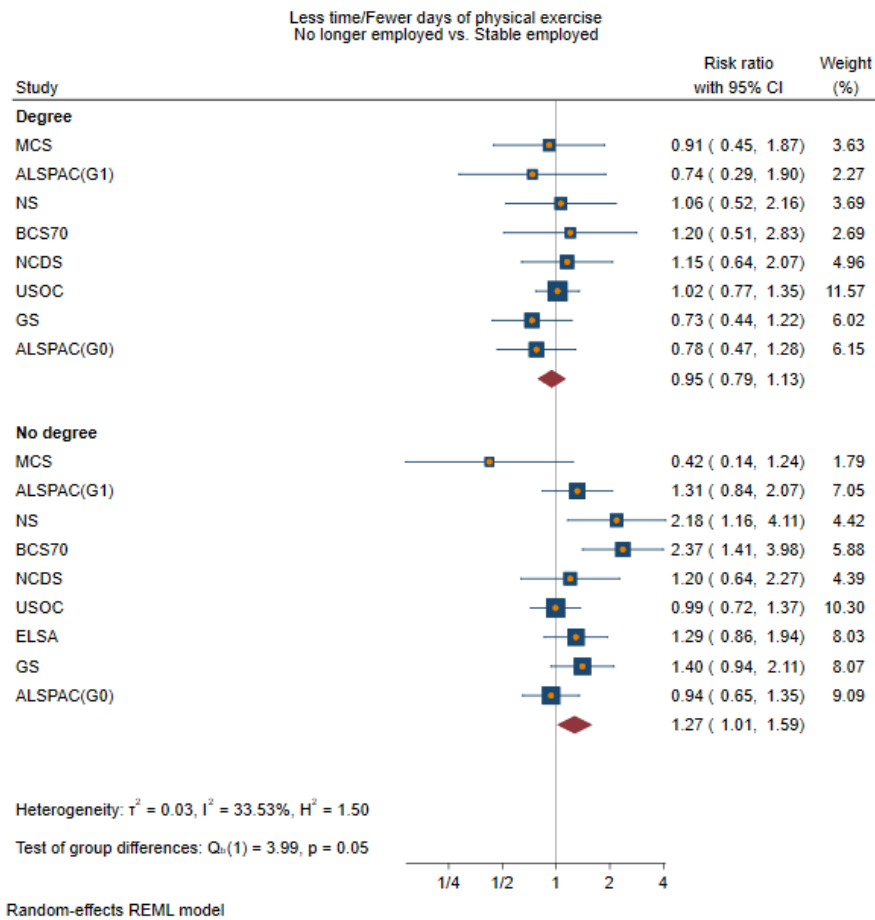

Less time/Fewer days of physical exercise  
Stable unemployed vs. Stable employed

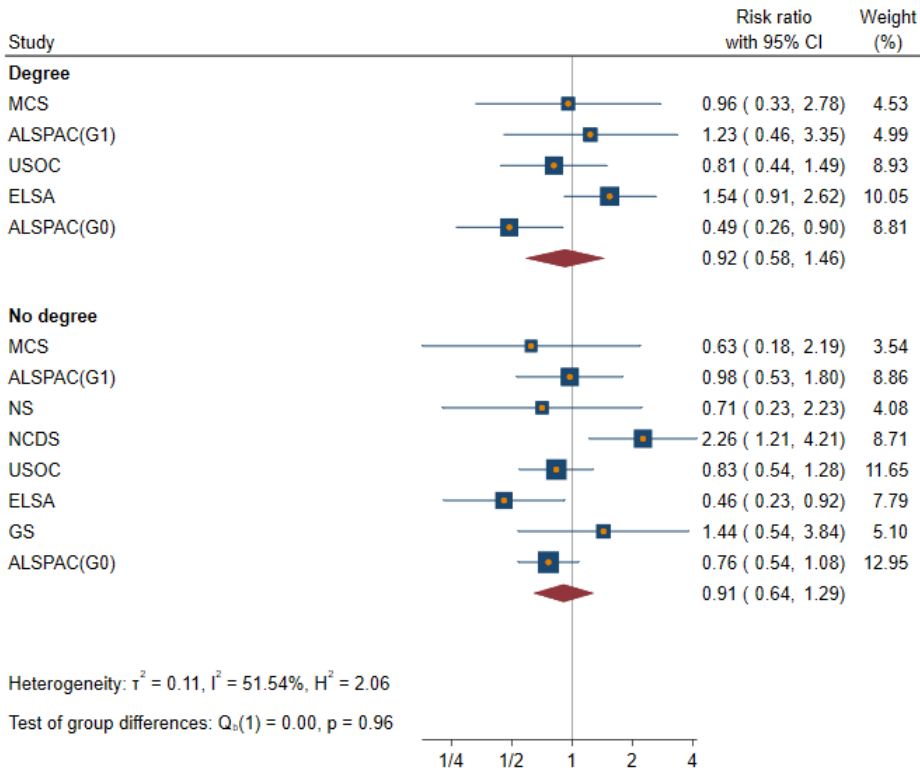

Random-effects REML model

Less time/Fewer days of physical exercise  
Became employed vs. Stable employed

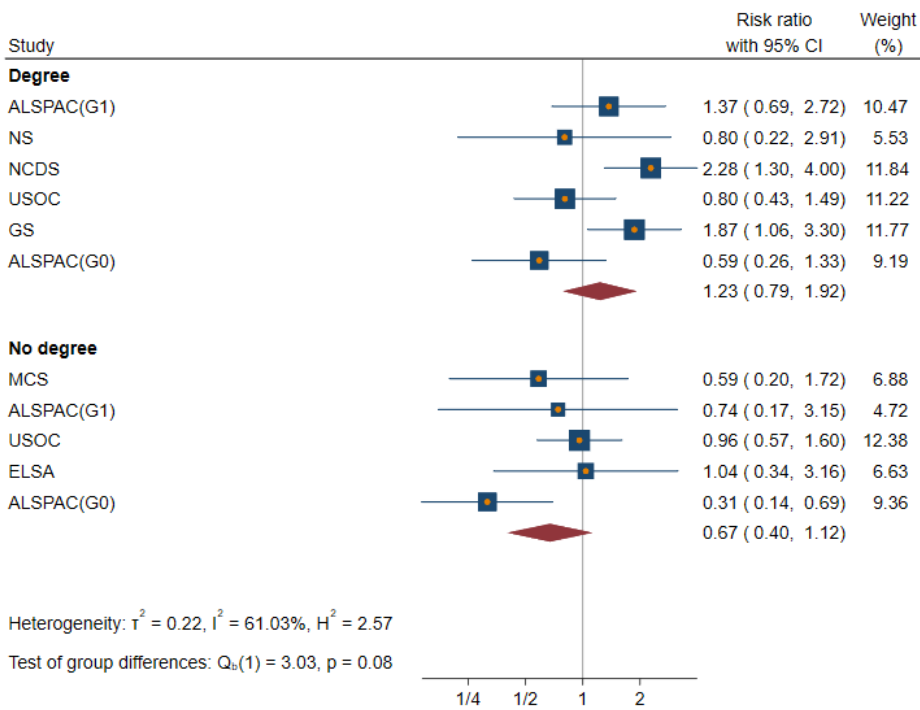

Random-effects REML model

Less time/Fewer days of physical exercise  
Stable non-employed vs. Stable employed

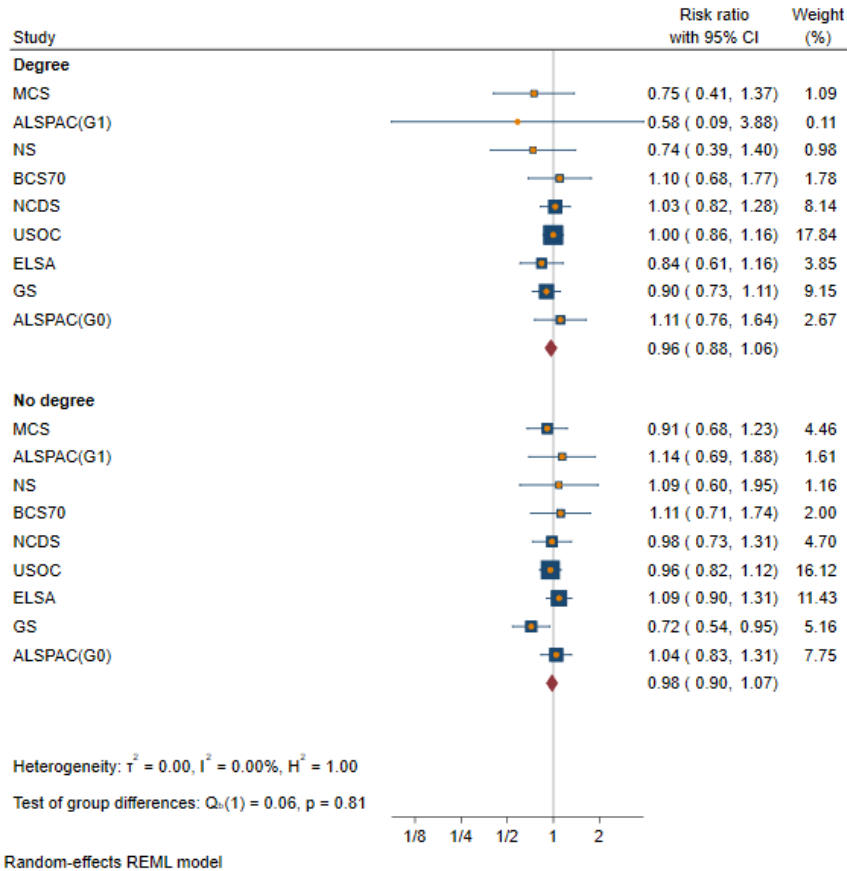

**Figure set 17: More time/ days of physical exercise**

Commented [MJ6]:

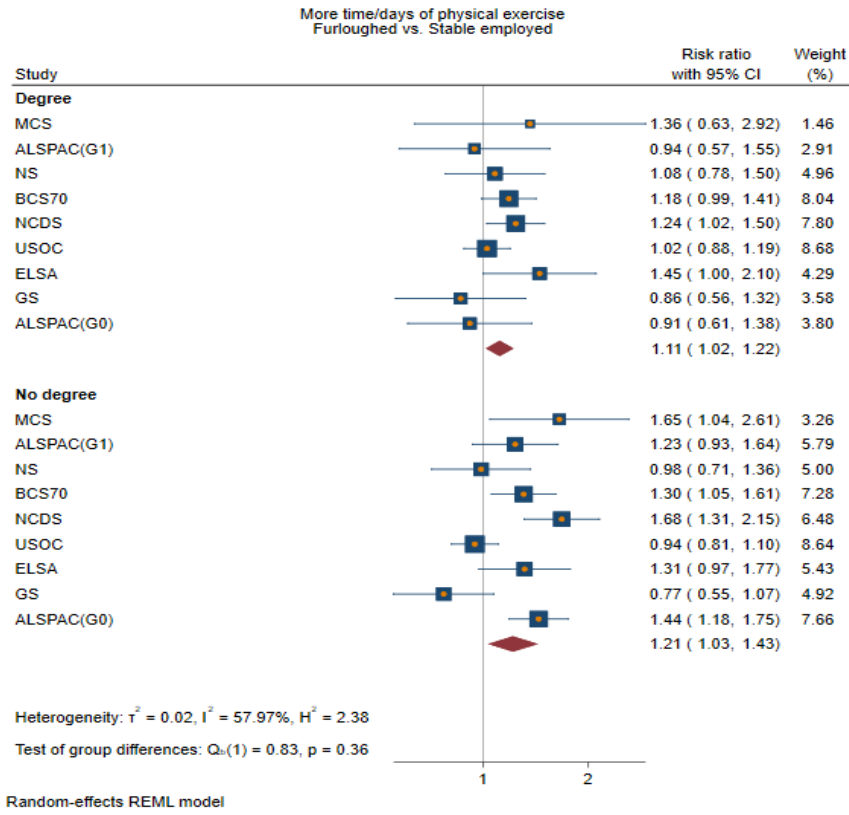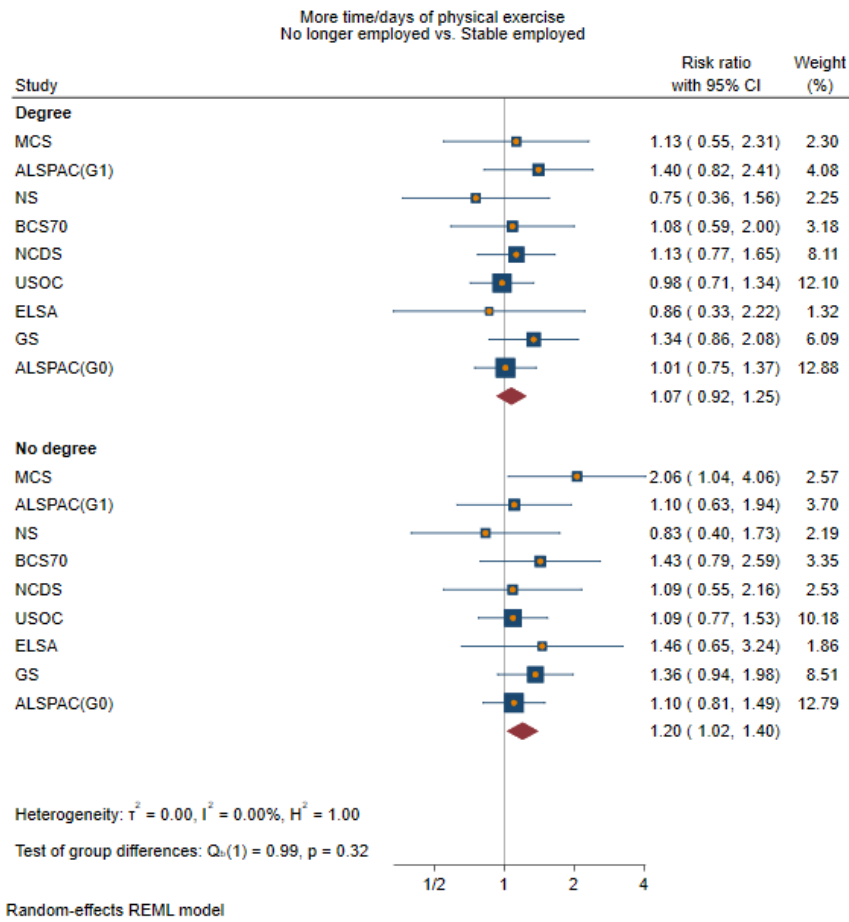



More time/days of physical exercise  
Stable unemployed vs. Stable employed

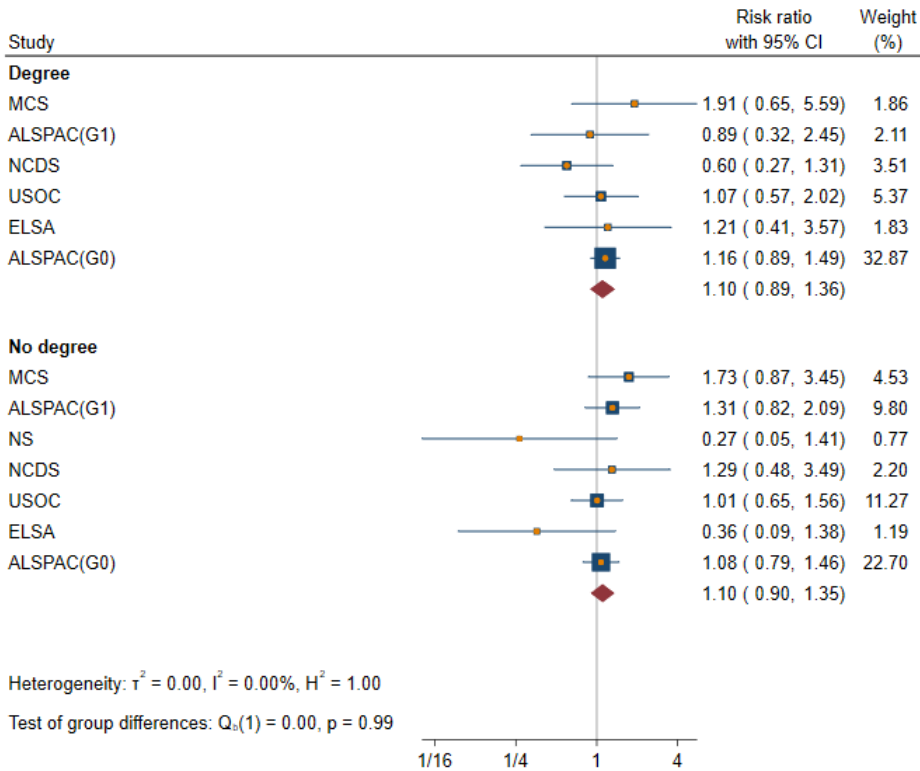

Random-effects REML model

More time/days of physical exercise  
Became employed vs. Stable employed

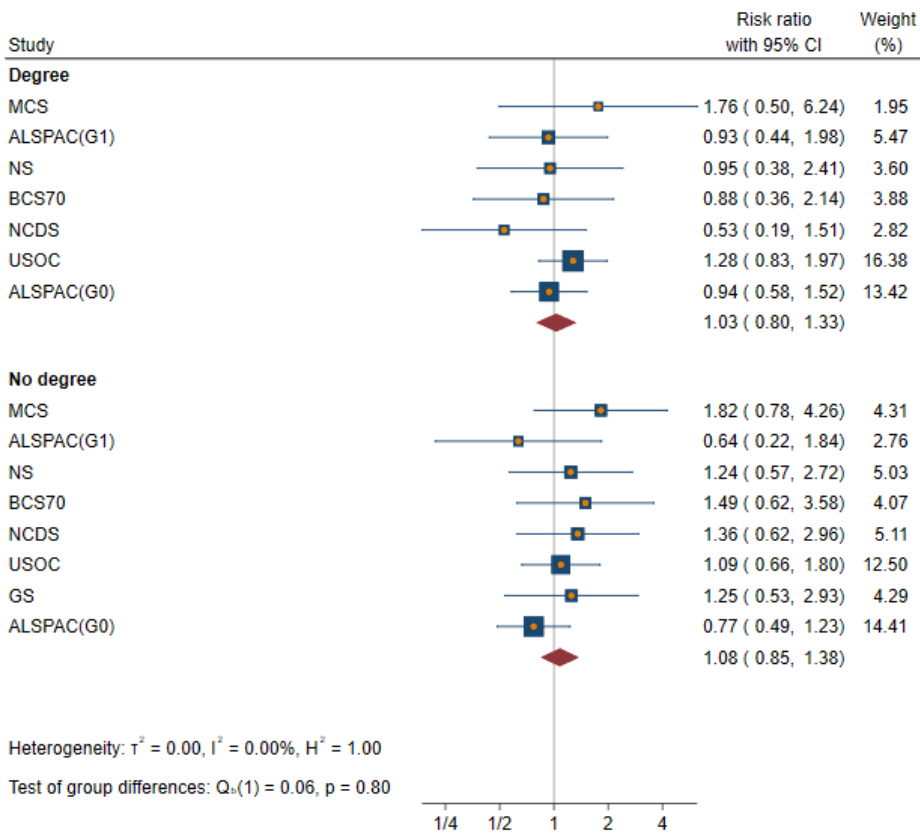

Random-effects REML model

More time/days of physical exercise  
Stable non-employed vs. Stable employed

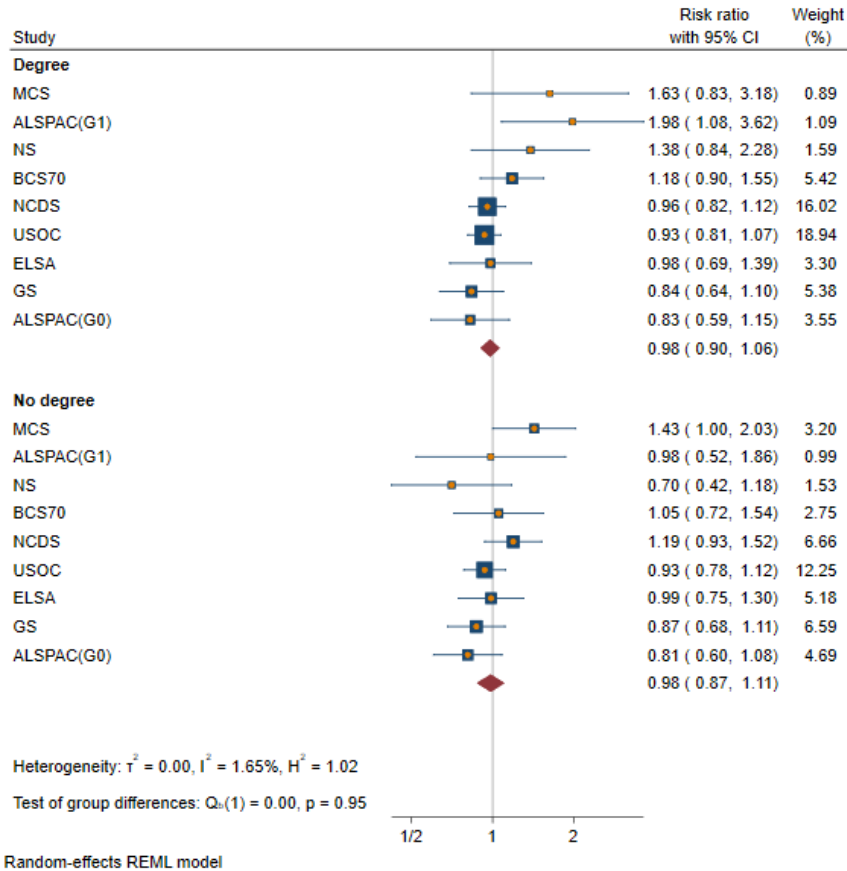

**Figure set 18: Sleeps outside 'normal range' (i.e. <6 or 9+ hours)**

Sleeps outside 'Normal Range' (i.e. <6 or 9+ hours)  
Furloughed vs. Stable employed

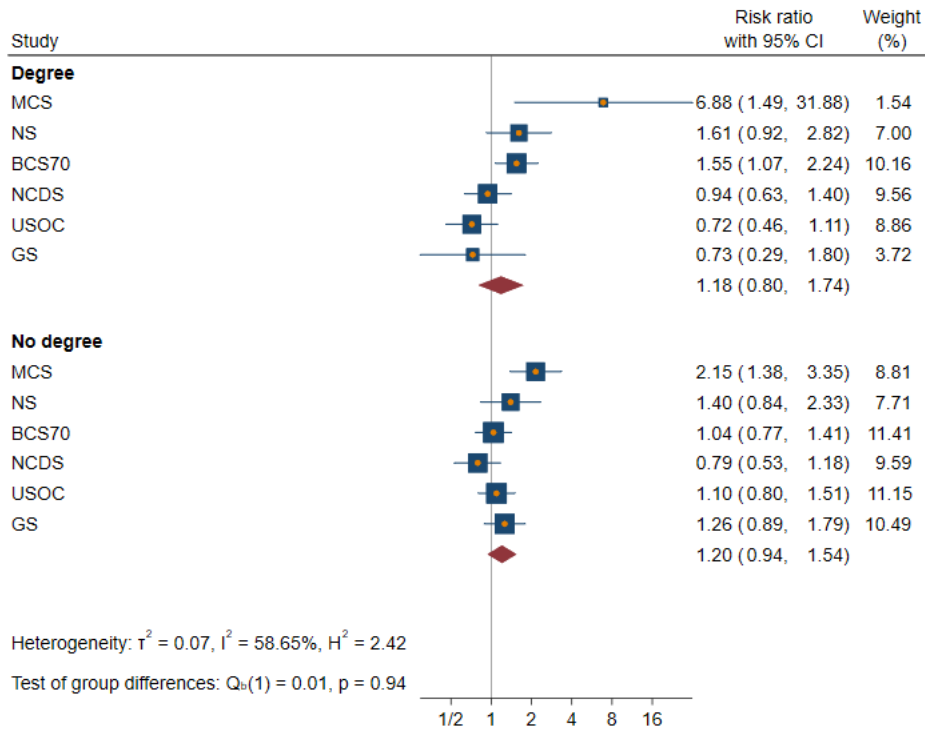

Sleeps outside 'Normal Range' (i.e. <6 or 9+ hours)  
No longer employed vs. Stable employed

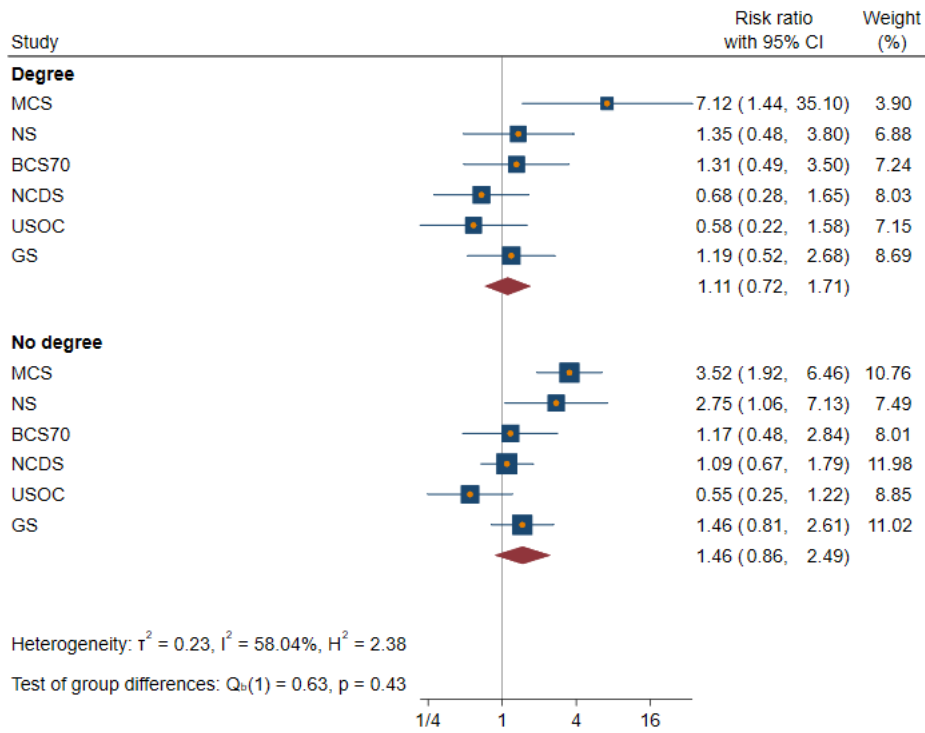

Sleeps outside 'Normal Range' (i.e. <6 or 9+ hours)  
Stable unemployed vs. Stable employed

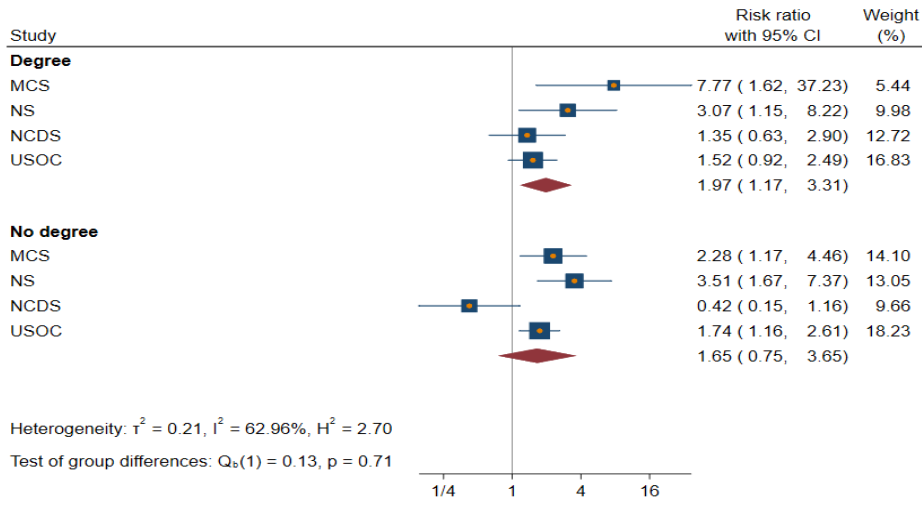

Random-effects REML model

Sleeps outside 'Normal Range' (i.e. <6 or 9+ hours)  
Became employed vs. Stable employed

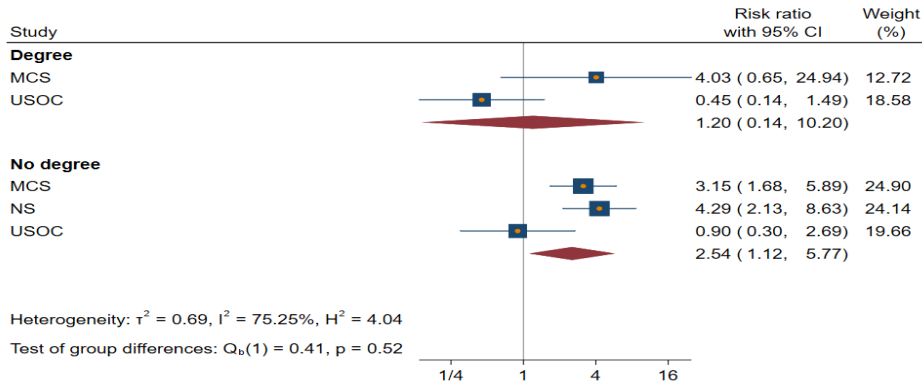

Random-effects REML model

Sleeps outside 'Normal Range' (i.e. <6 or 9+ hours)  
Stable non-employed vs. Stable employed

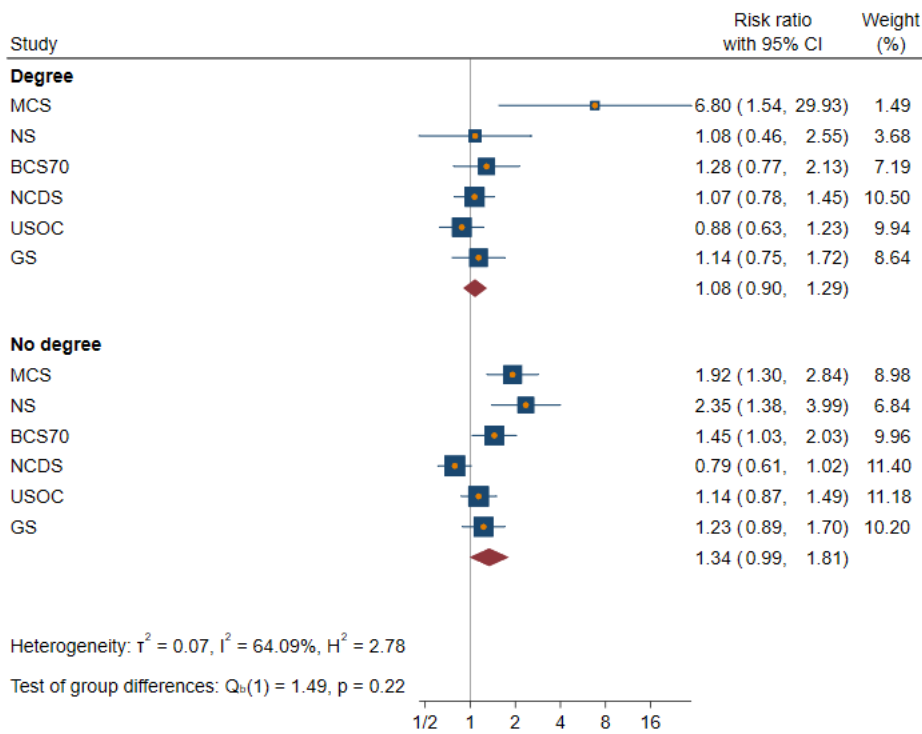

Random-effects REML model

Figure set 19: Sleeps less than before

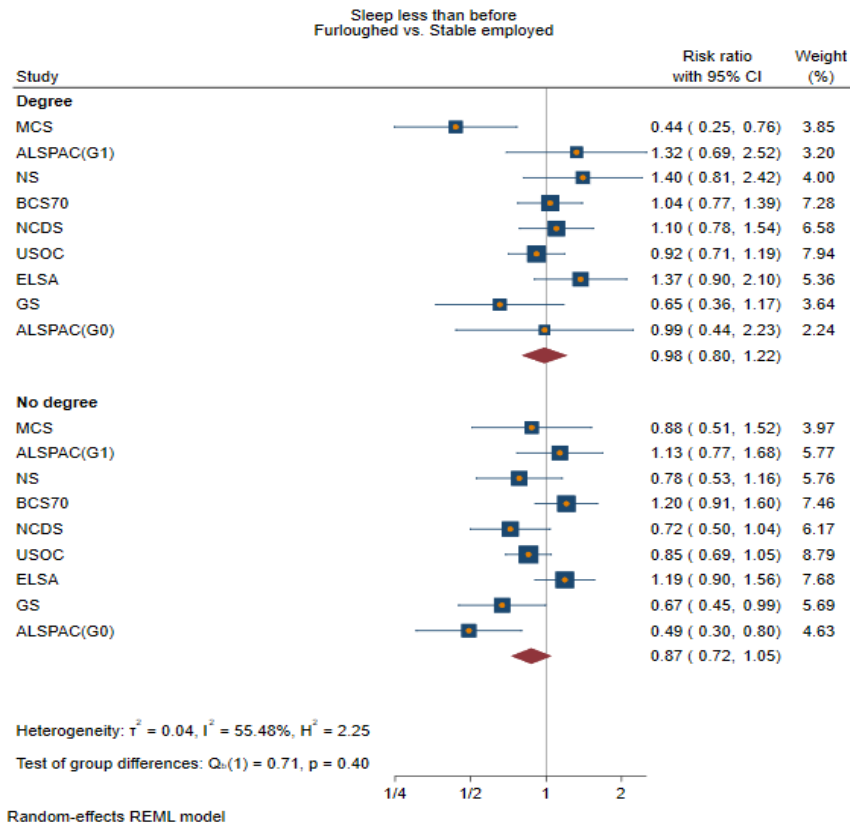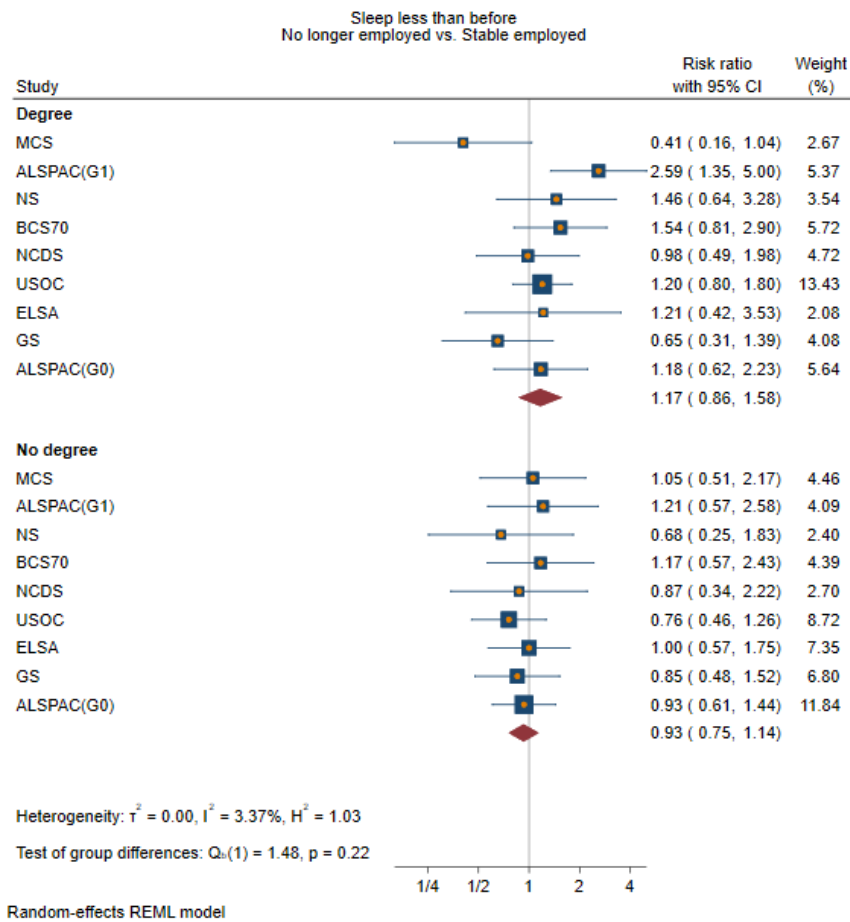

Sleep less than before  
Stable unemployed vs. Stable employed

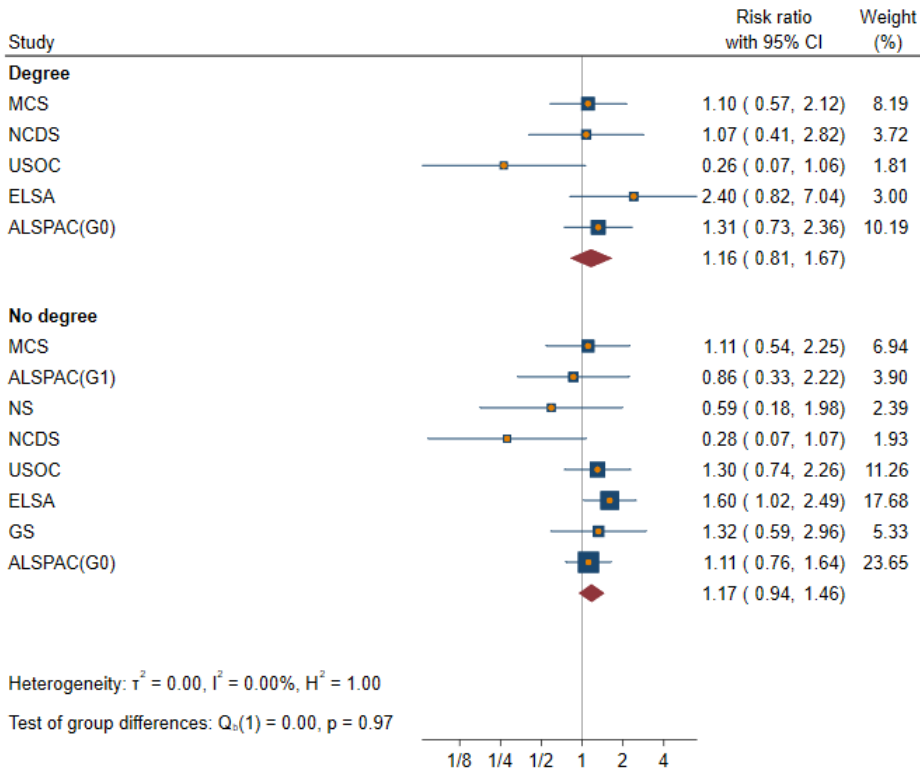

Random-effects REML model

Sleep less than before  
Became employed vs. Stable employed

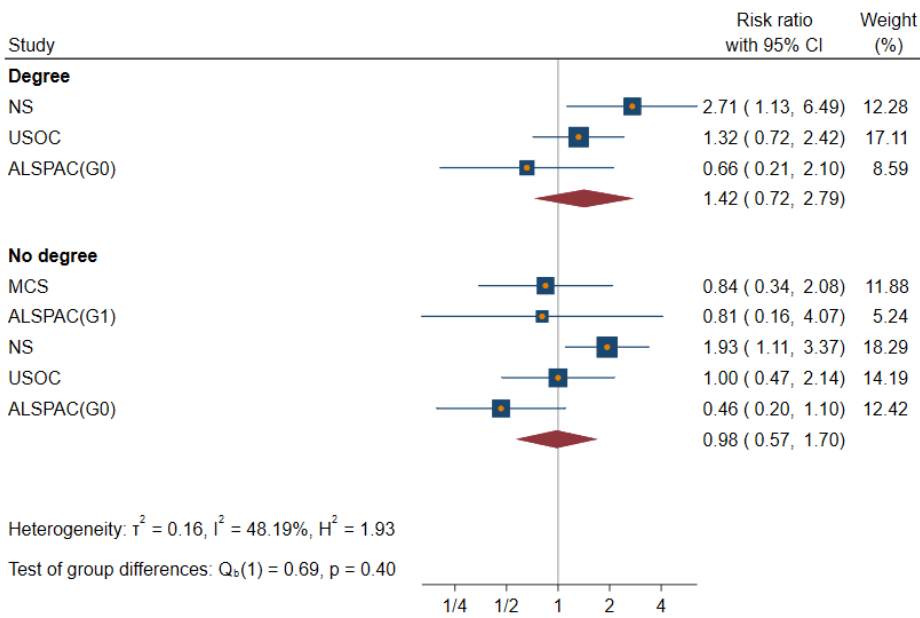

Random-effects REML model

Sleep less than before  
Stable non-employed vs. Stable employed

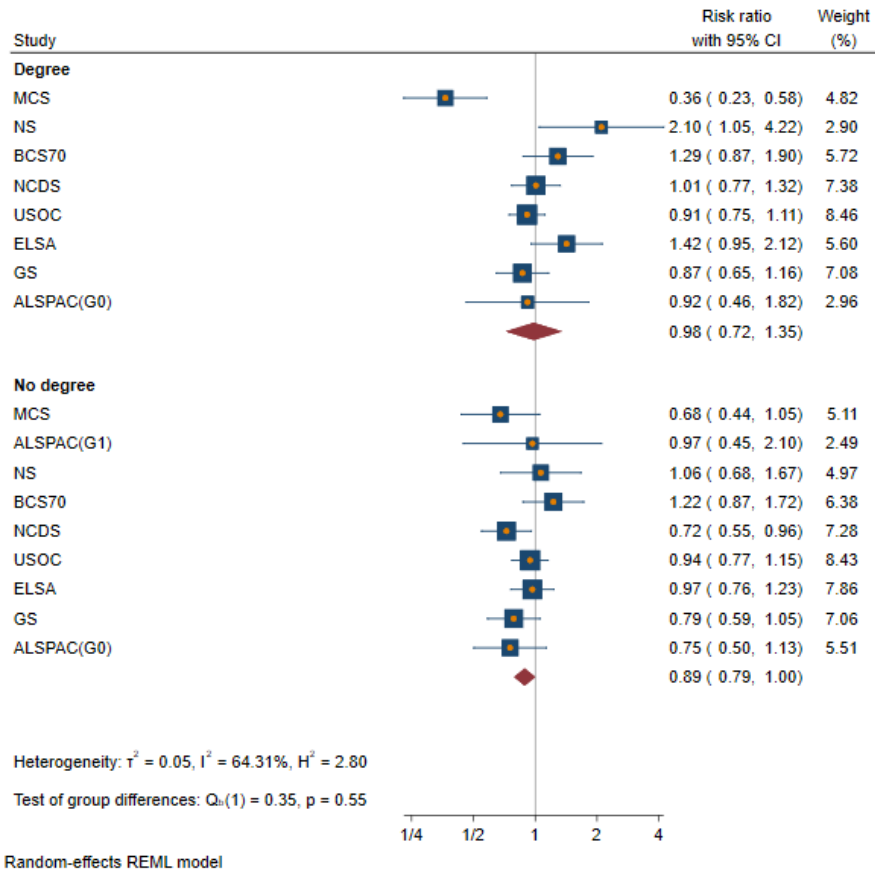

Figure set 20: Sleeps more than before

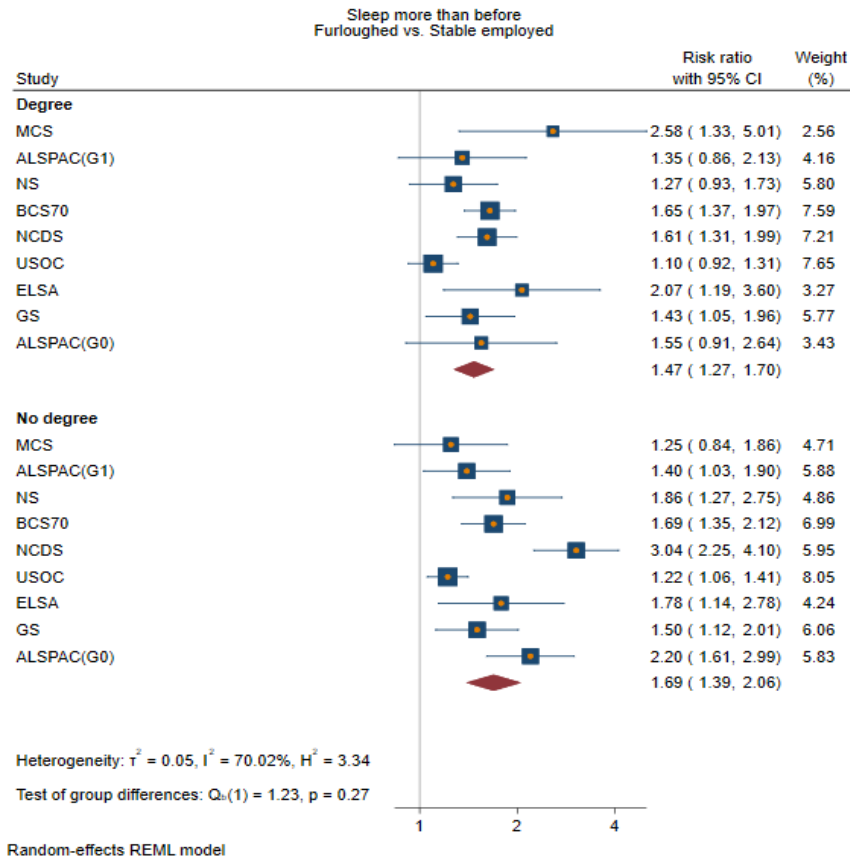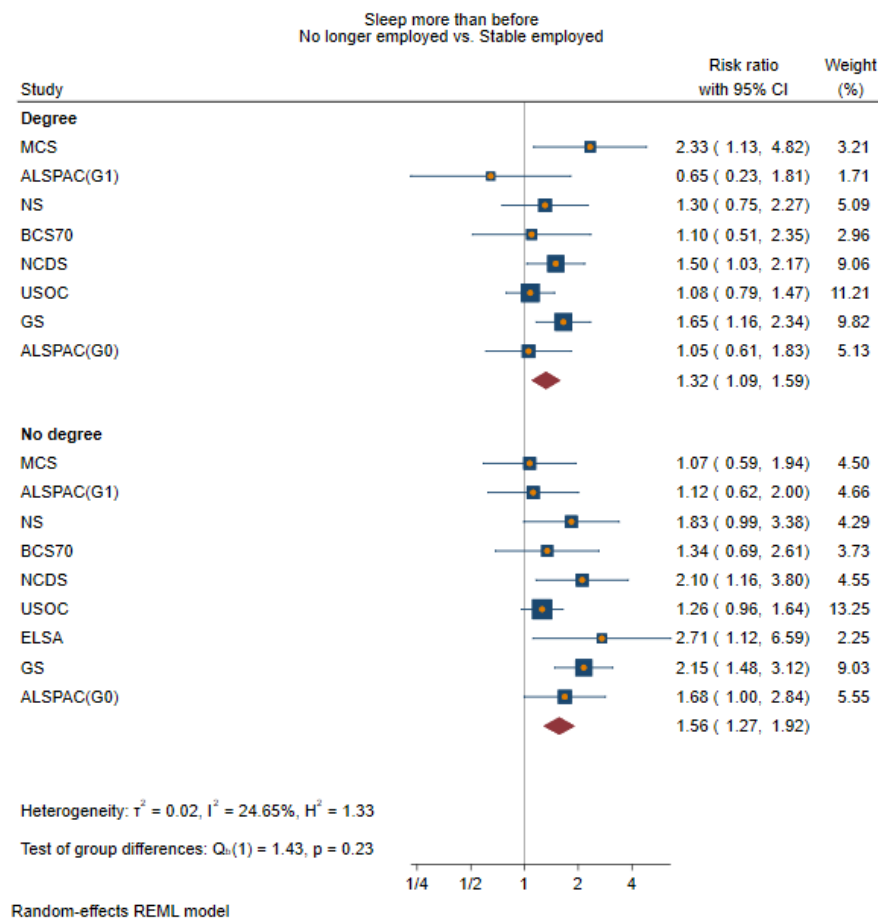



Sleep more than before  
Stable unemployed vs. Stable employed

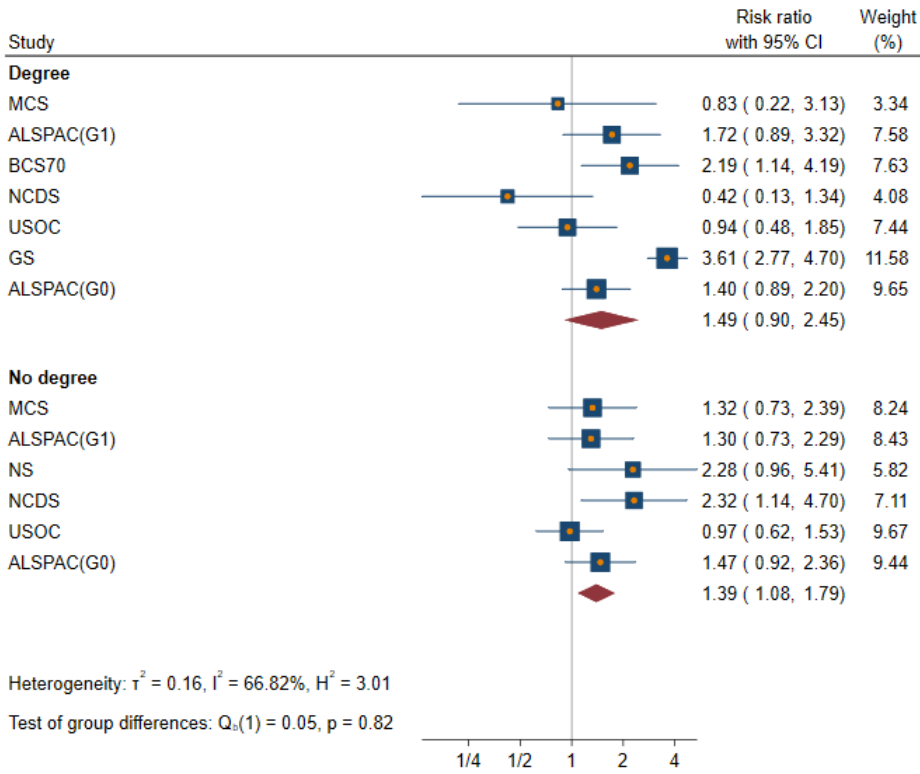

Random-effects REML model

Sleep more than before  
Became employed vs. Stable employed

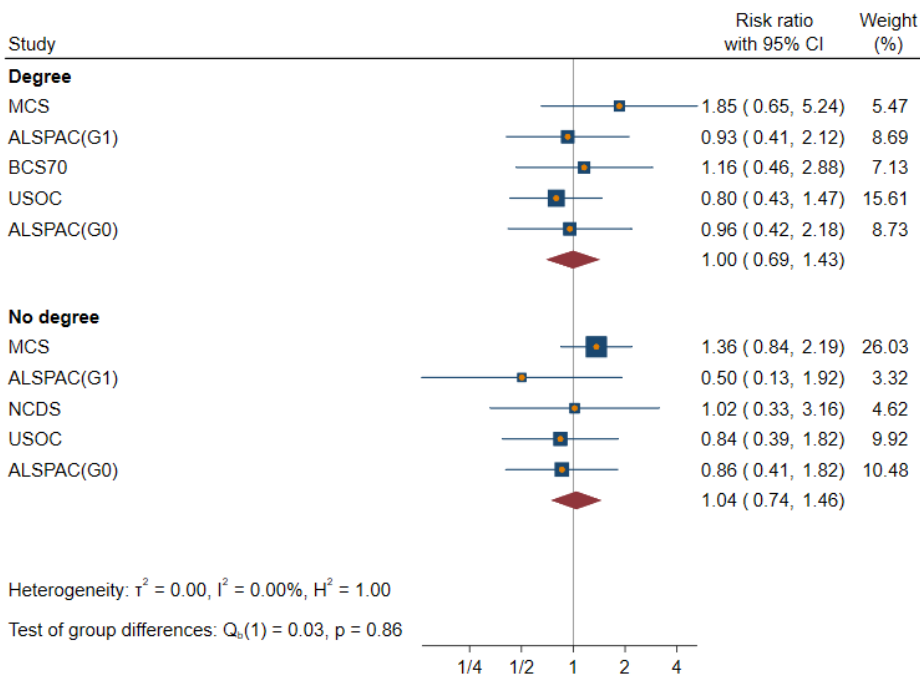

Random-effects REML model

Sleep more than before  
Stable non-employed vs. Stable employed

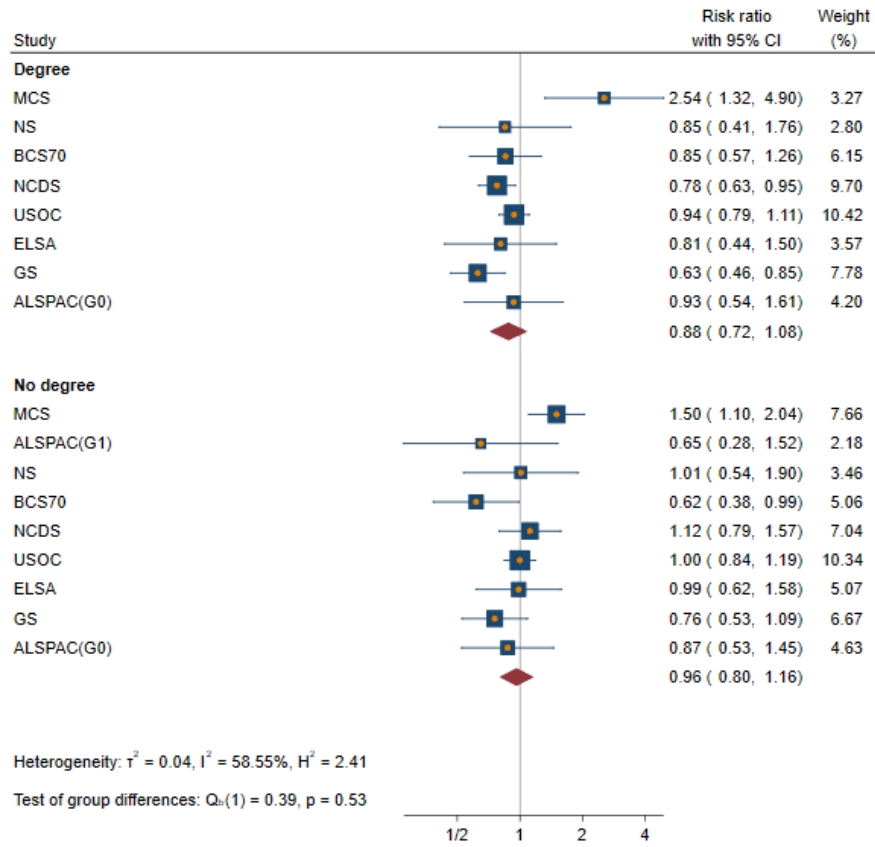

**Figure set 21: From 6/9h a night to 'normal range'**

From 6/9h a night to outside 'normal range'  
Furloughed vs. Stable employed

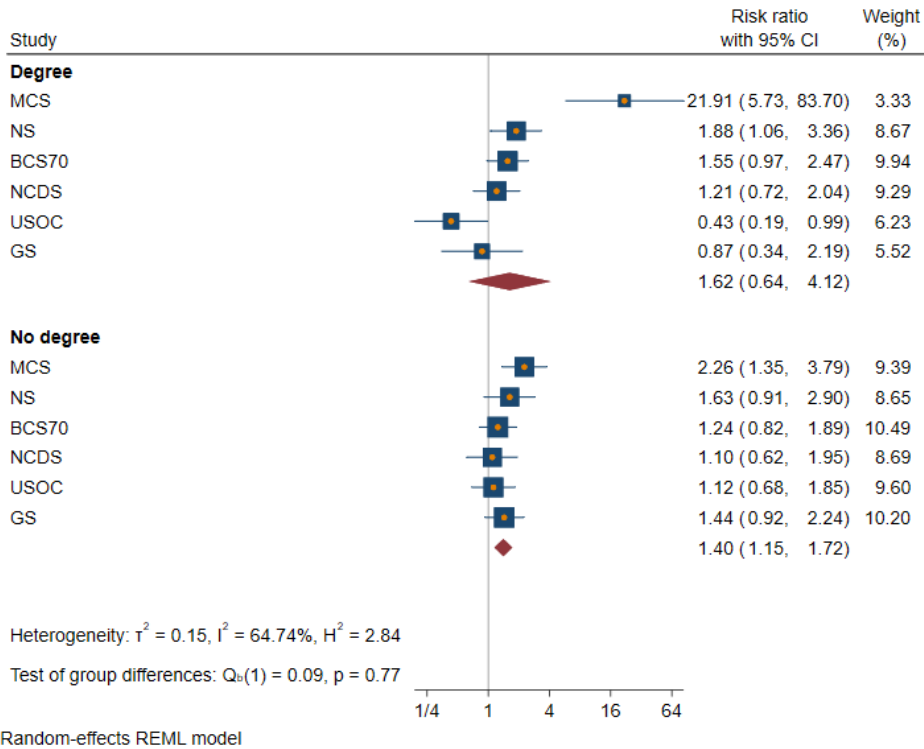

From 6/9h a night to outside 'normal range'  
No longer employed vs. Stable employed

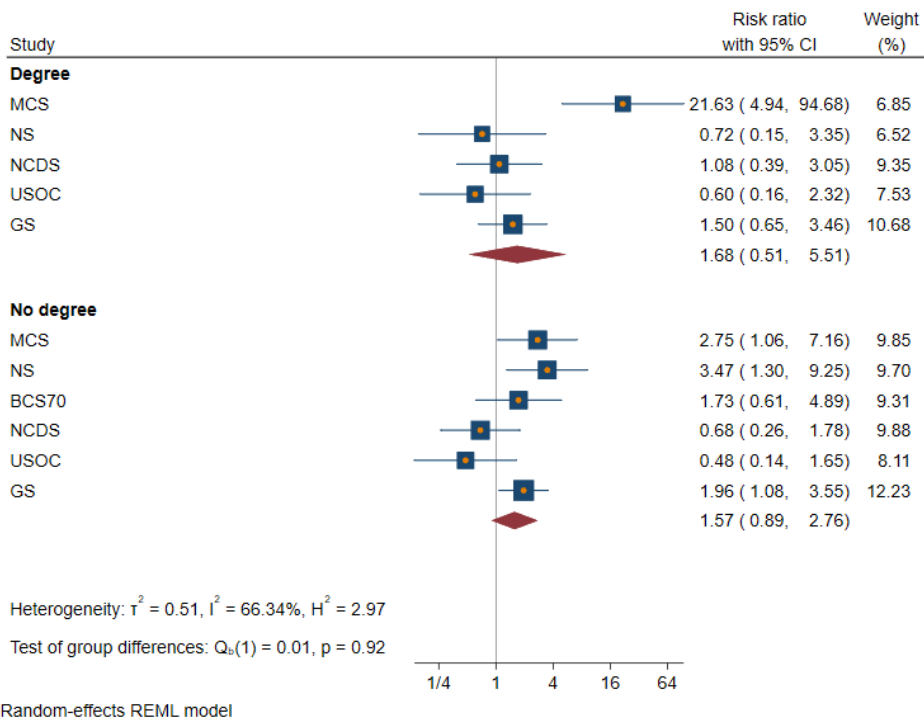

From 6/9h a night to outside 'normal range  
Stable unemployed vs. Stable employed

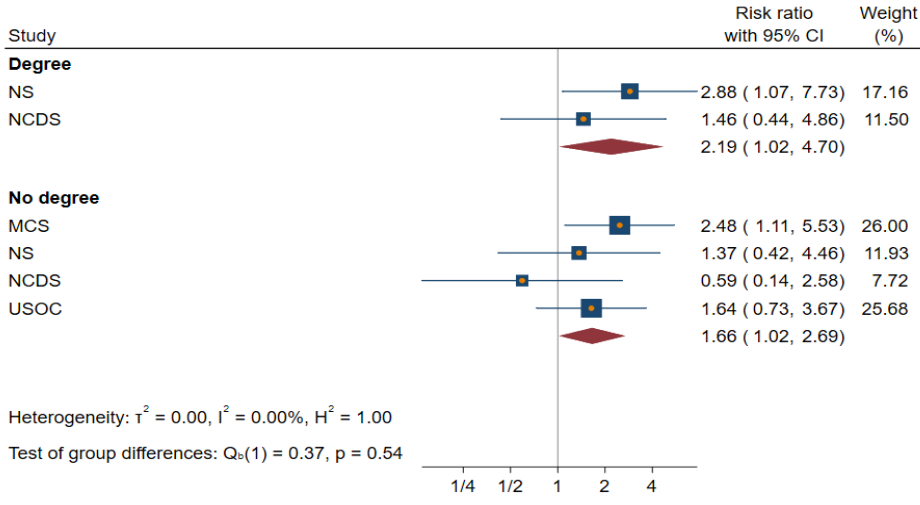

Random-effects REML model

From 6/9h a night to outside 'normal range  
Became employed vs. Stable employed

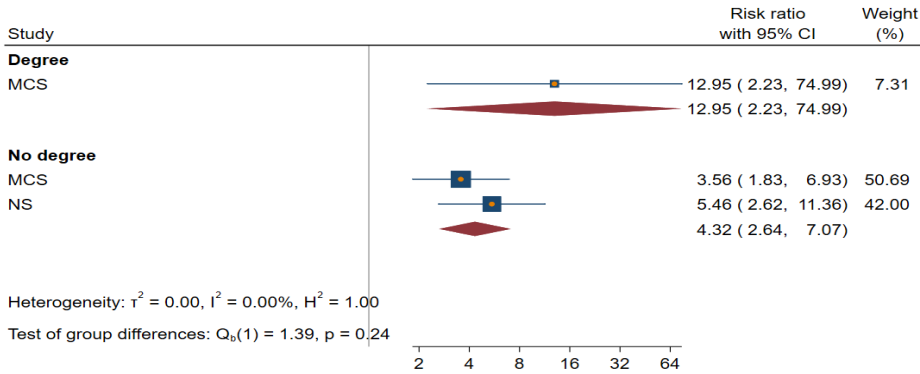

Random-effects REML model

From 6/9h a night to outside 'normal range  
Stable non-employed vs. Stable employed

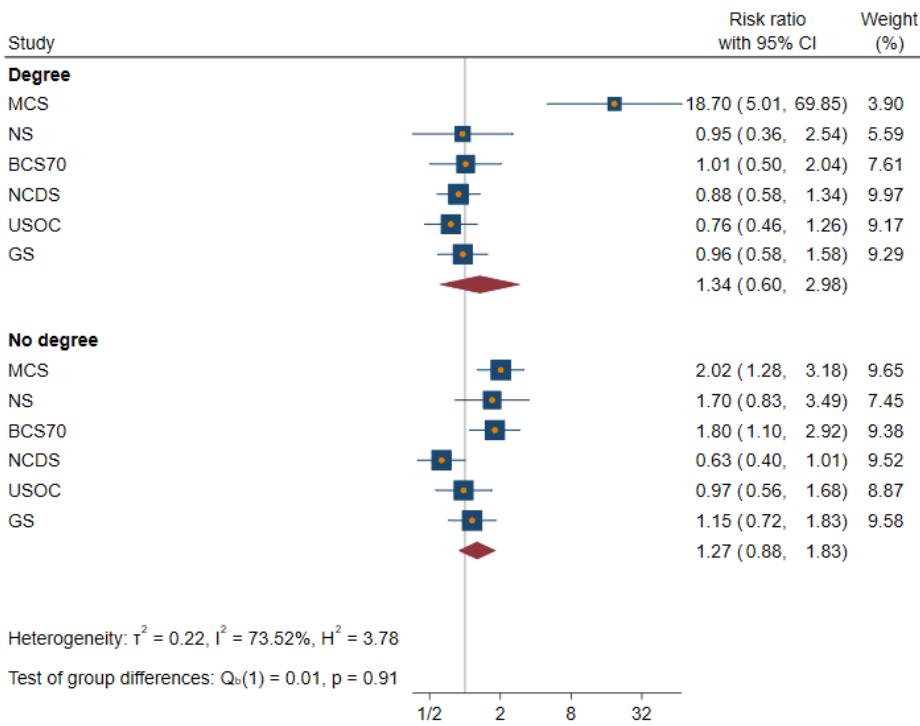

Random-effects REML model

**Figure set 22: From 'normal range' to 6/9h a night**

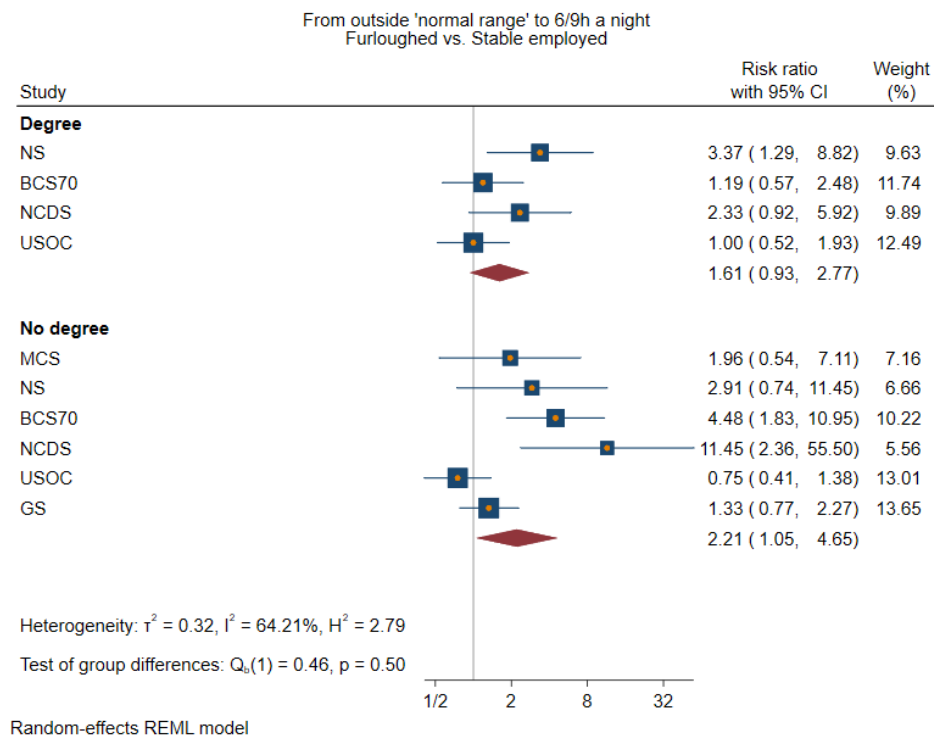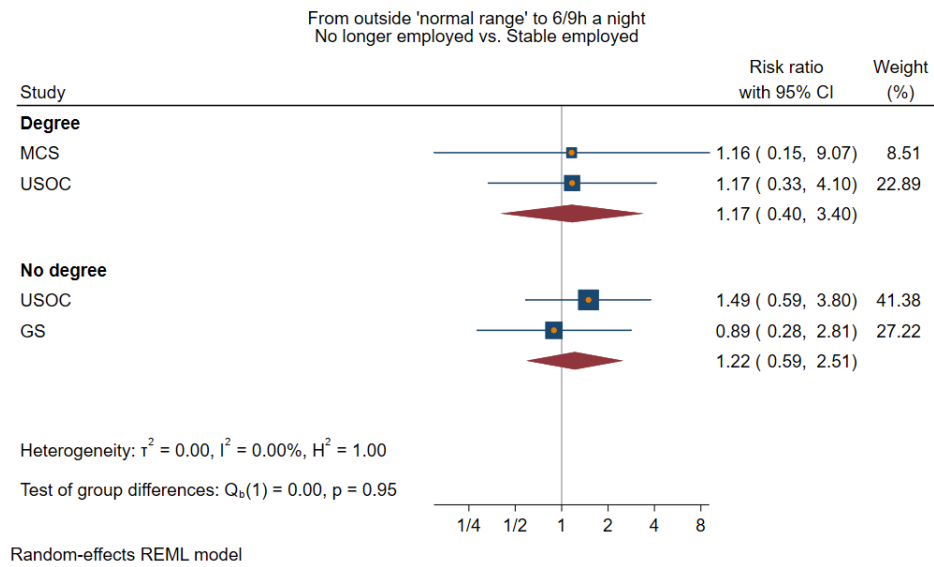

From outside 'normal range' to 6/9h a night  
Stable unemployed vs. Stable employed

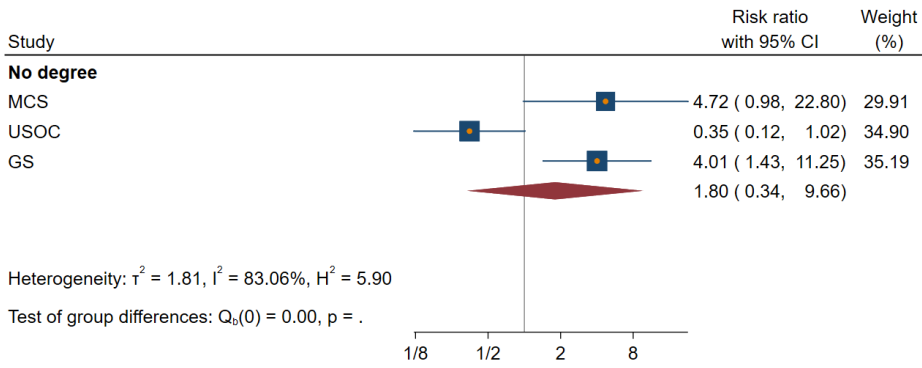

Random-effects REML model

From outside 'normal range' to 6/9h a night  
Became employed vs. Stable employed

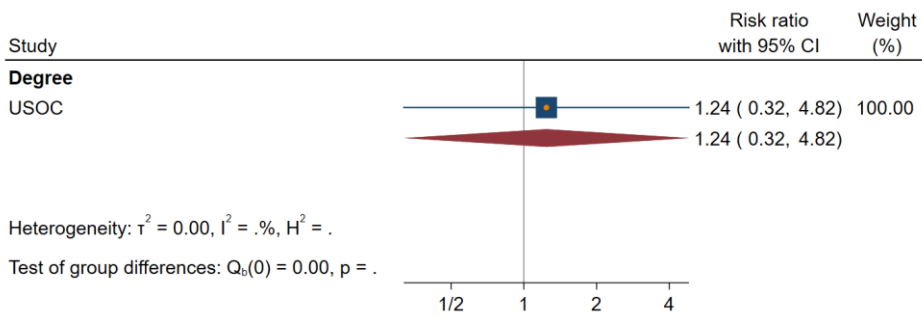

Random-effects REML model

From outside 'normal range' to 6/9h a night  
Stable non-employed vs. Stable employed

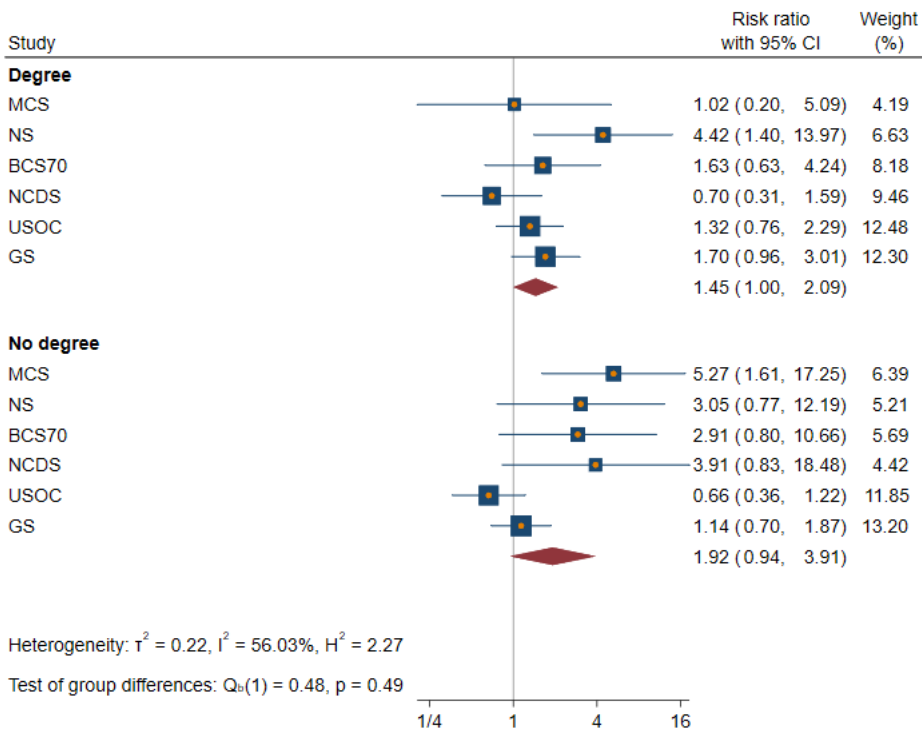

Random-effects REML model

**Figure set 23: Currently eats 2 or fewer fruit and veg**

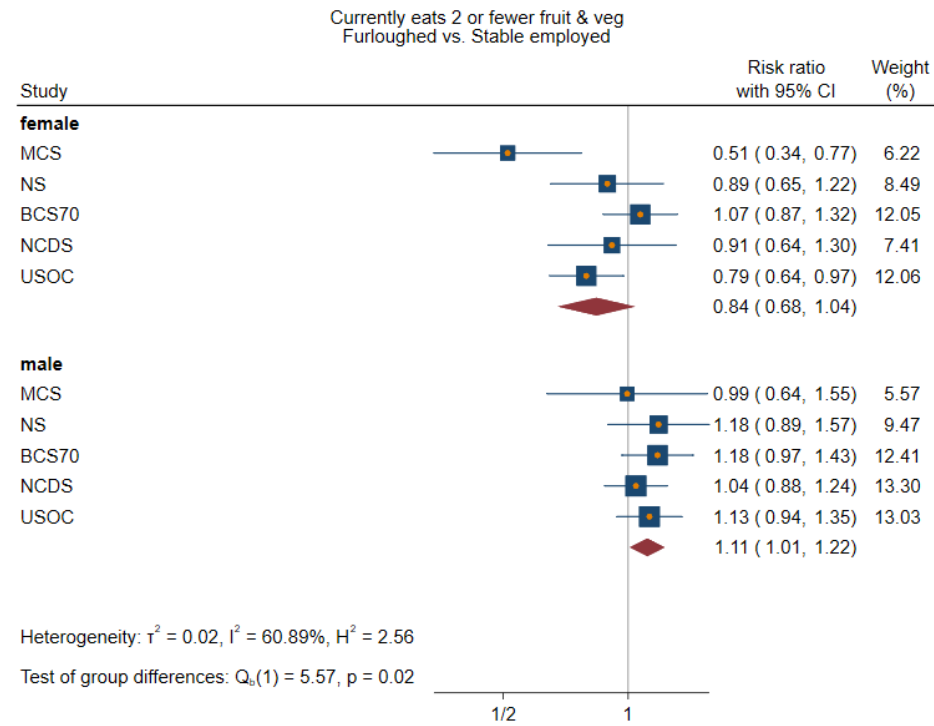

Random-effects REML model

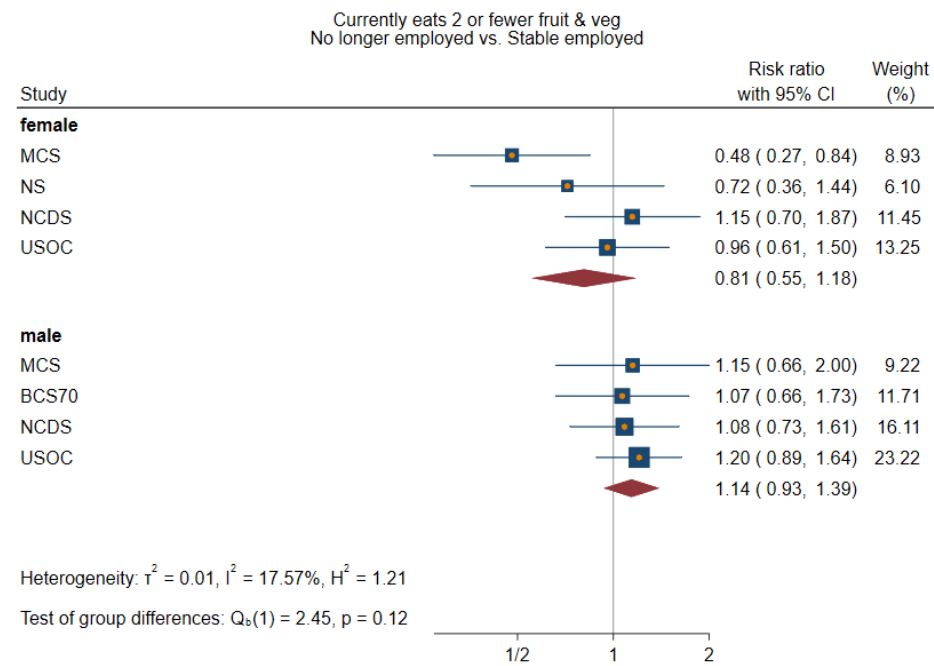

Random-effects REML model

Currently eats 2 or fewer fruit & veg  
Stable unemployed vs. Stable employed

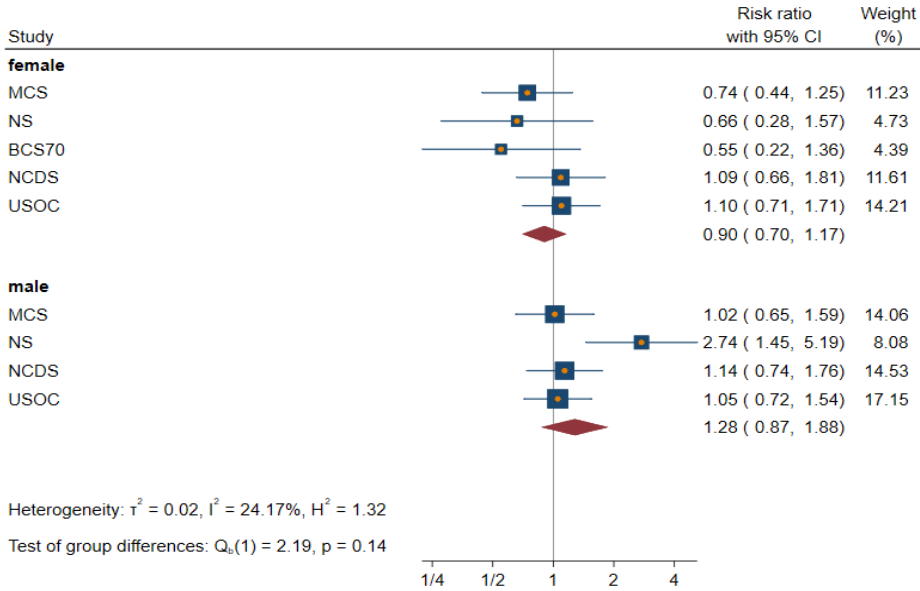

Random-effects REML model

Currently eats 2 or fewer fruit & veg  
Became employed vs. Stable employed

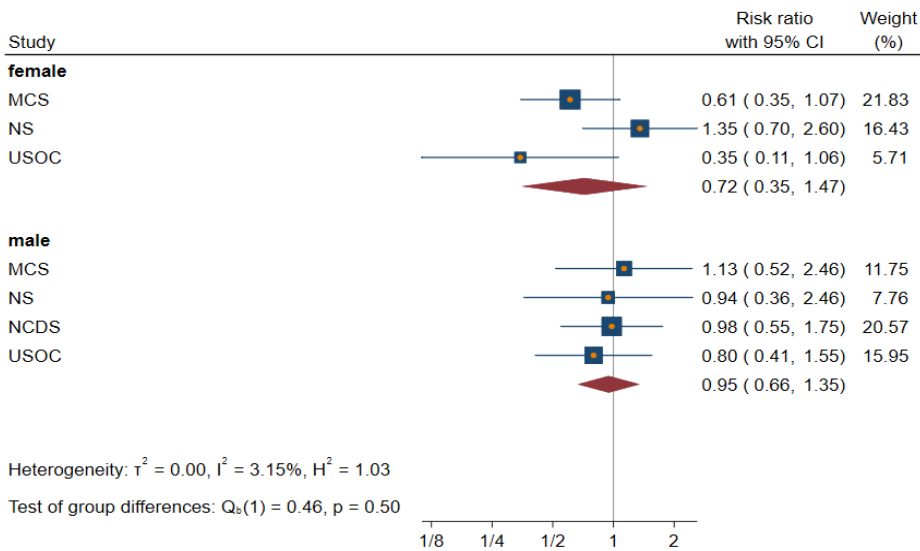

Random-effects REML model

Currently eats 2 or fewer fruit & veg  
Stable non-employed vs. Stable employed

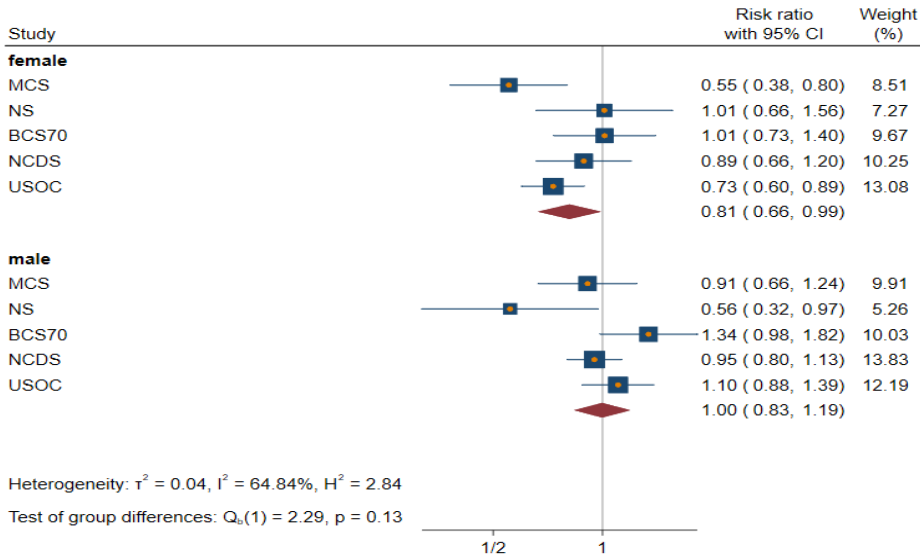

Random-effects REML model



**Figure set 24: Fewer fruit and veg**

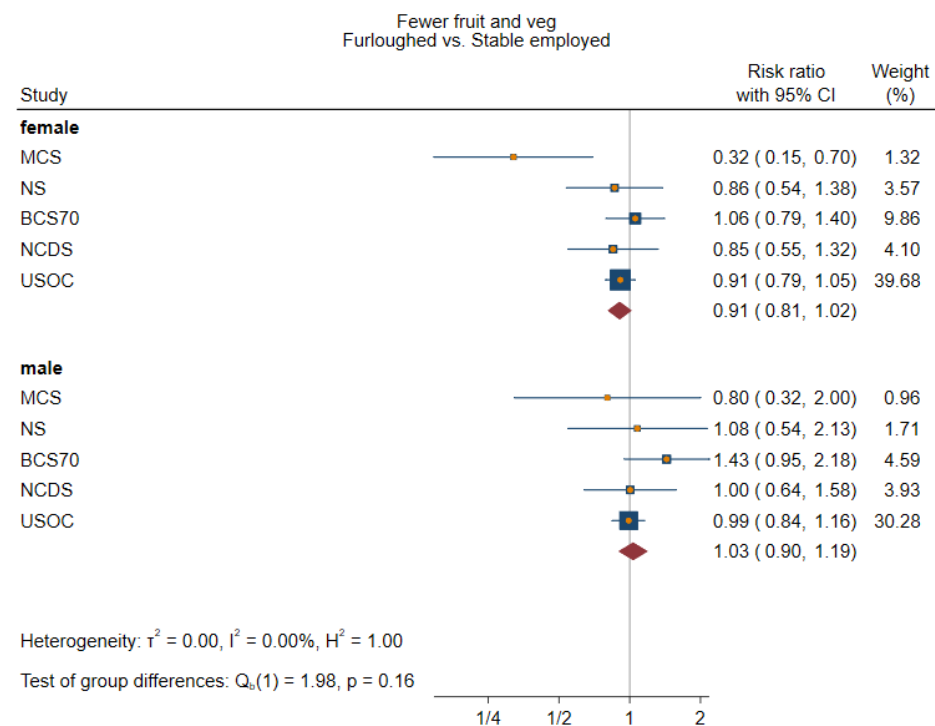

Random-effects REML model

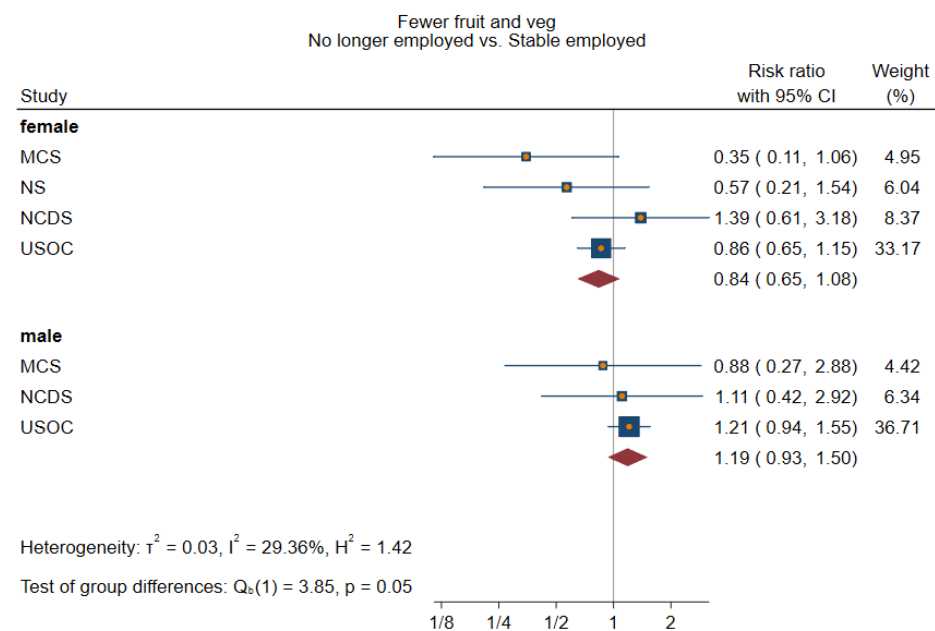

Random-effects REML model

Fewer fruit and veg  
Stable unemployed vs. Stable employed

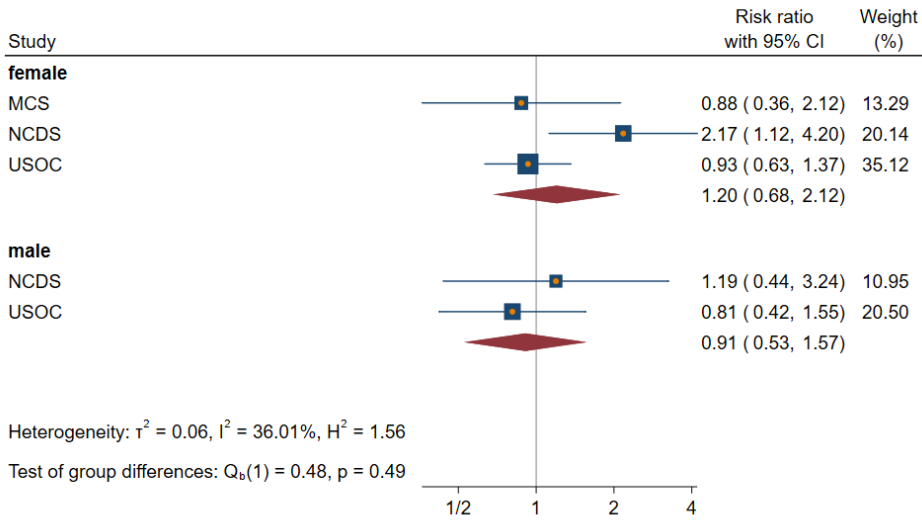

Random-effects REML model

Fewer fruit and veg  
Became employed vs. Stable employed

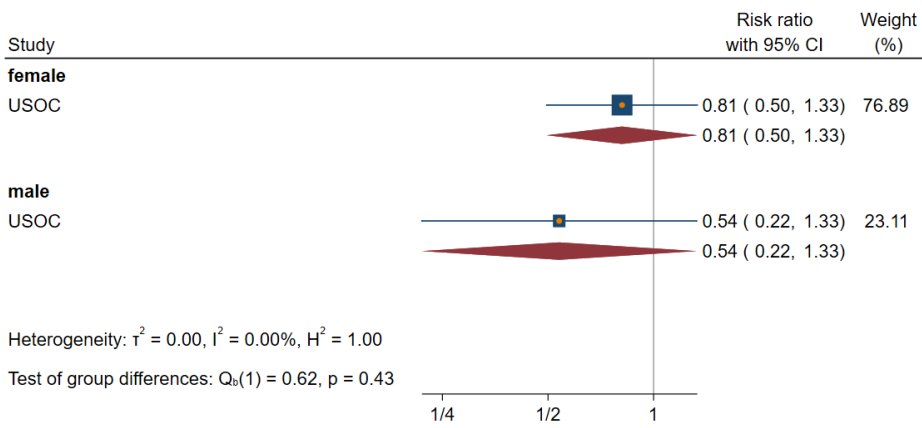

Random-effects REML model

Fewer fruit and veg  
Stable non-employed vs. Stable employed

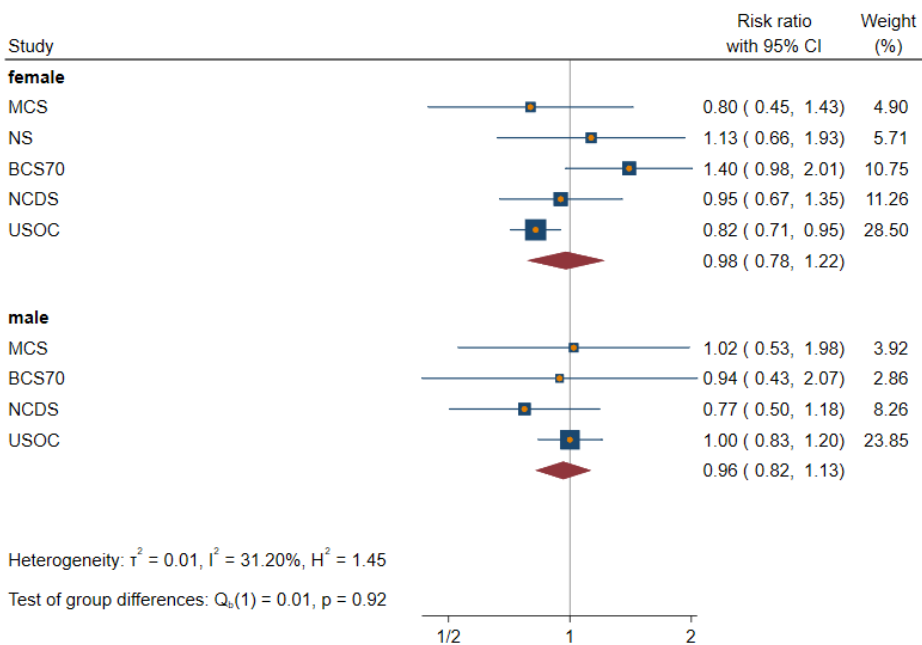

Random-effects REML model

## Figure set 25: More fruit and veg

More fruit and veg  
Furloughed vs. Stable employed

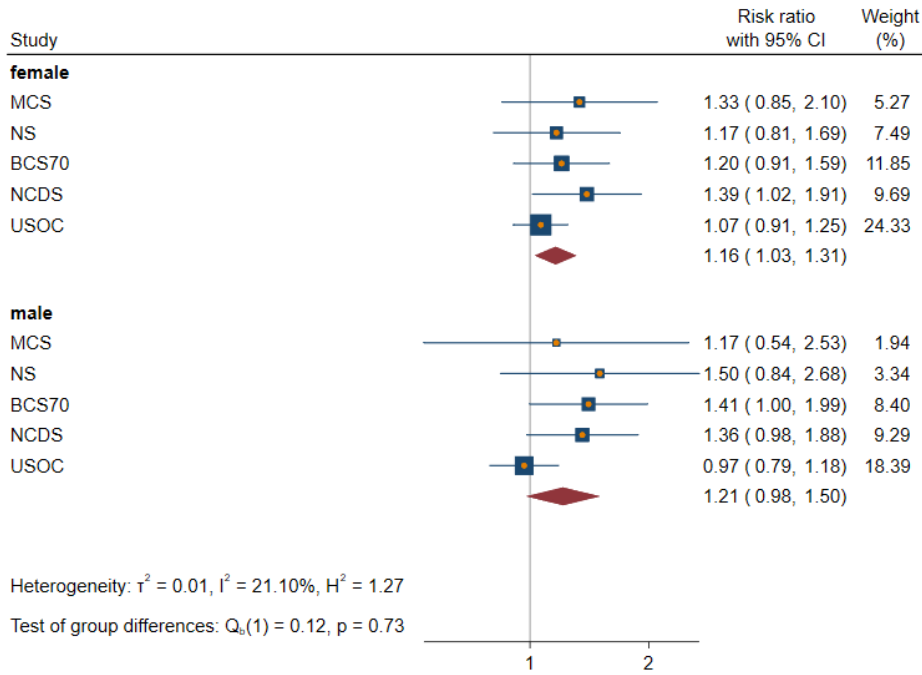

Random-effects REML model

More fruit and veg  
No longer employed vs. Stable employed

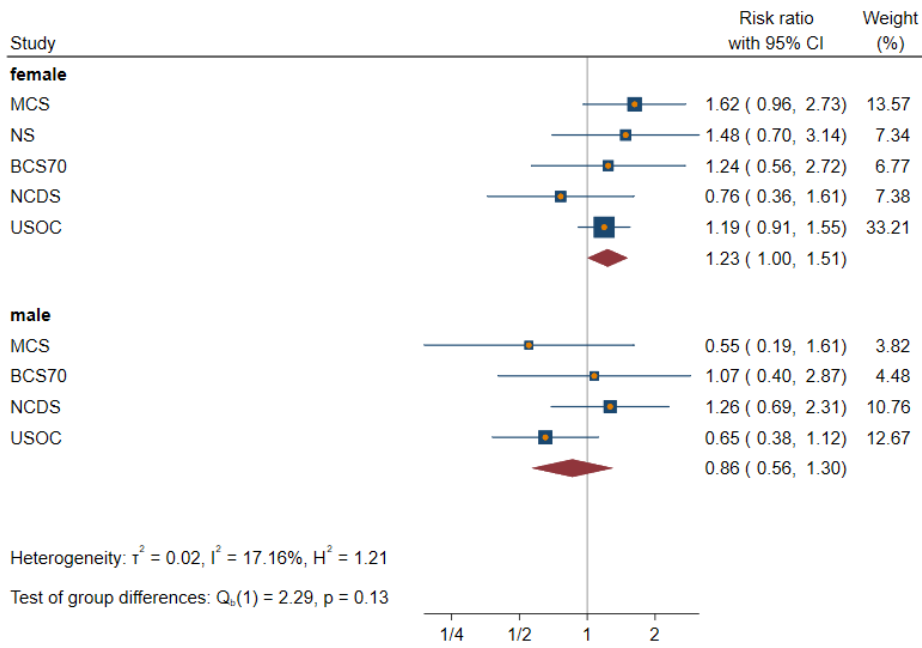

Random-effects REML model

More fruit and veg  
Stable unemployed vs. Stable employed

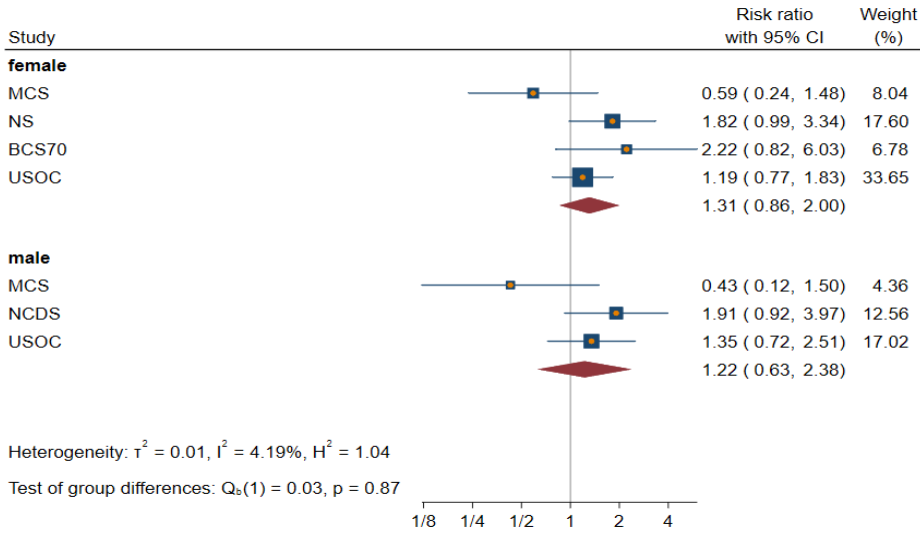

Random-effects REML model

More fruit and veg  
Became employed vs. Stable employed

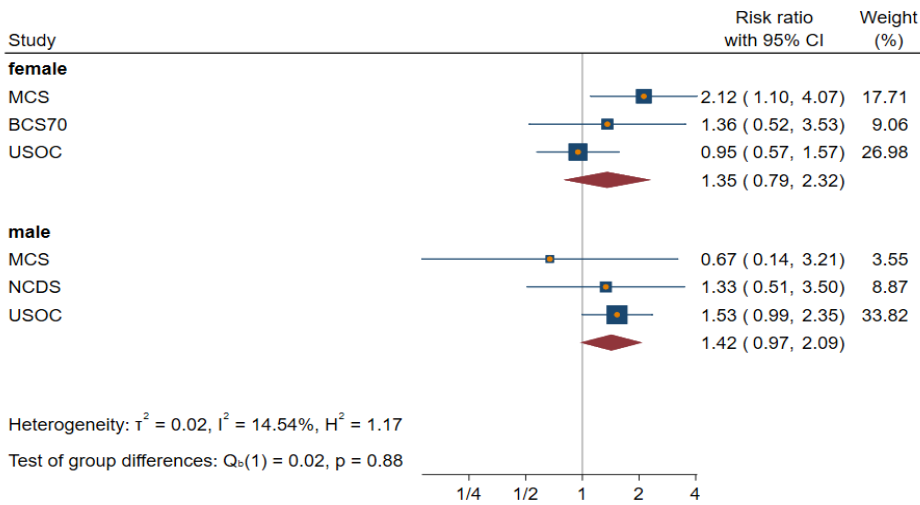

Random-effects REML model

More fruit and veg  
Stable non-employed vs. Stable employed

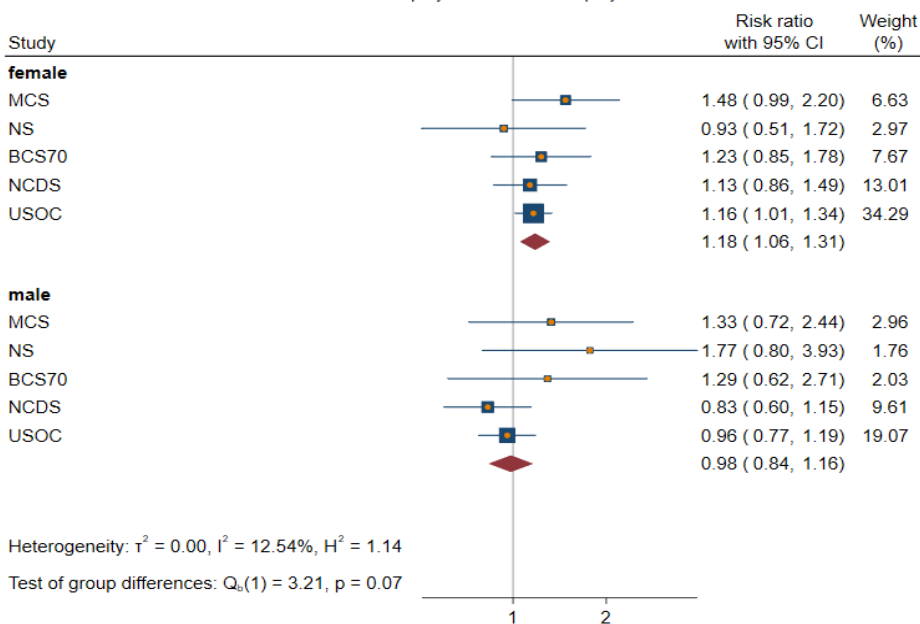

Random-effects REML model

**Figure set 26: Less than 3 days a week of at least 30min exercise**

Less than 3 days a week of at least 30min exercise  
Furloughed vs. Stable employed

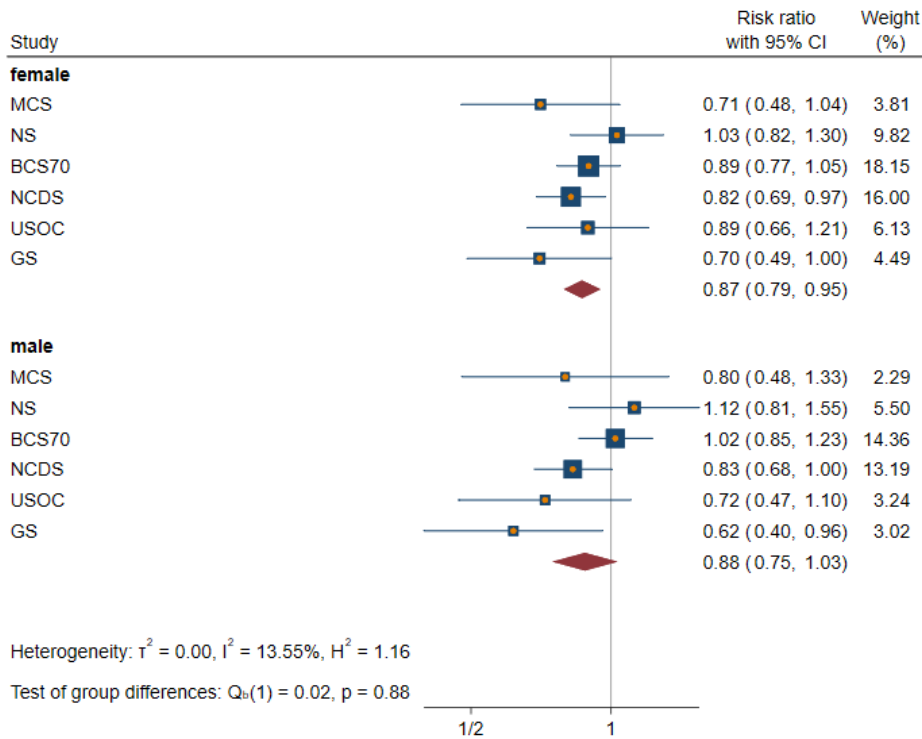

Random-effects REML model

Less than 3 days a week of at least 30min exercise  
No longer employed vs. Stable employed

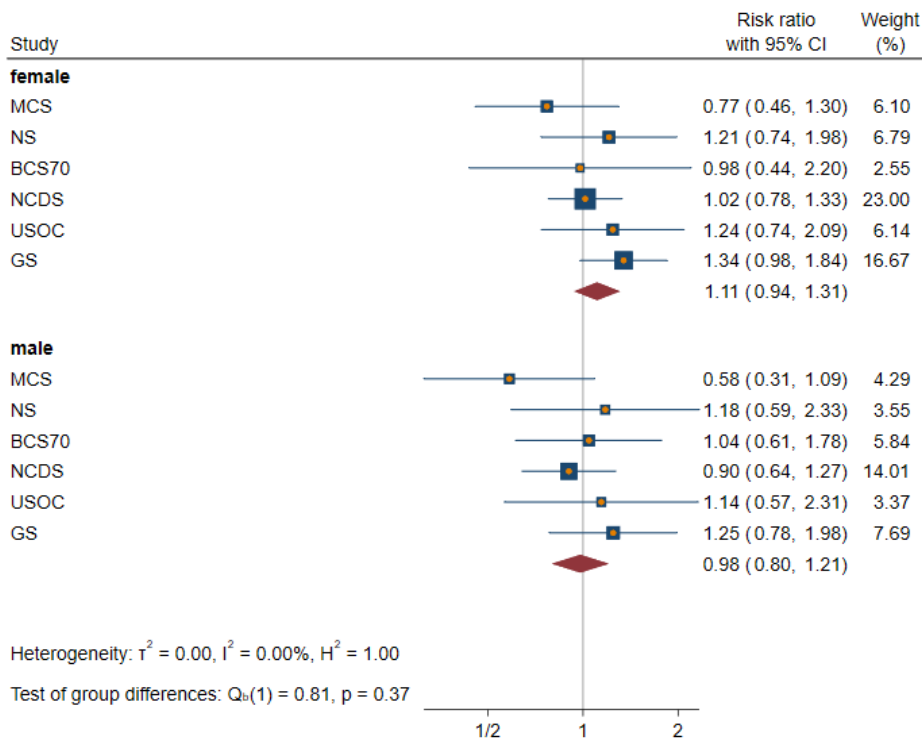

Random-effects REML model

Less than 3 days a week of at least 30min exercise  
Stable unemployed vs. Stable employed

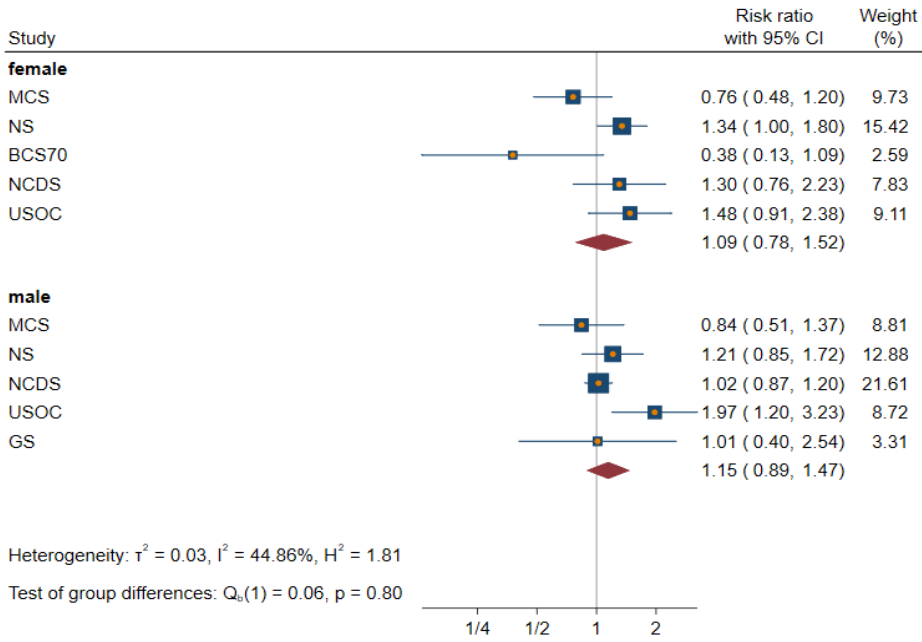

Random-effects REML model

Less than 3 days a week of at least 30min exercise  
Became employed vs. Stable employed

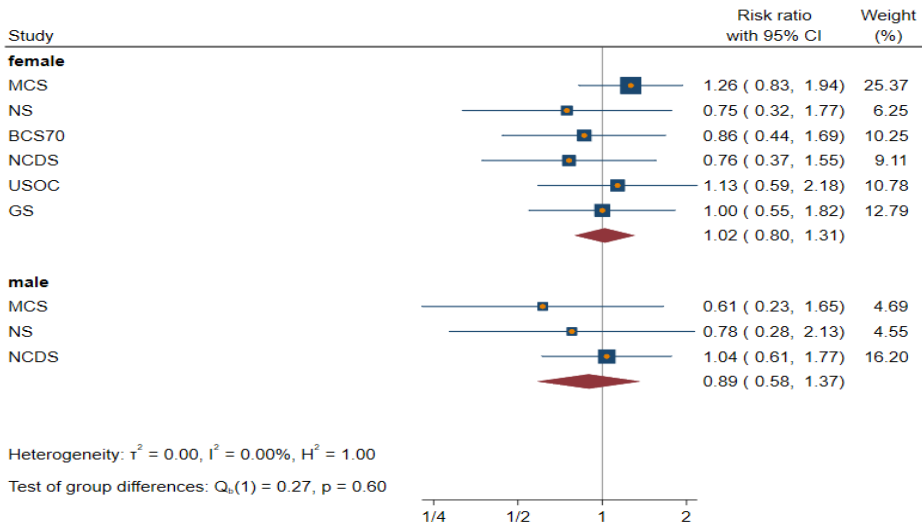

Random-effects REML model

Less than 3 days a week of at least 30min exercise  
Stable non-employed vs. Stable employed

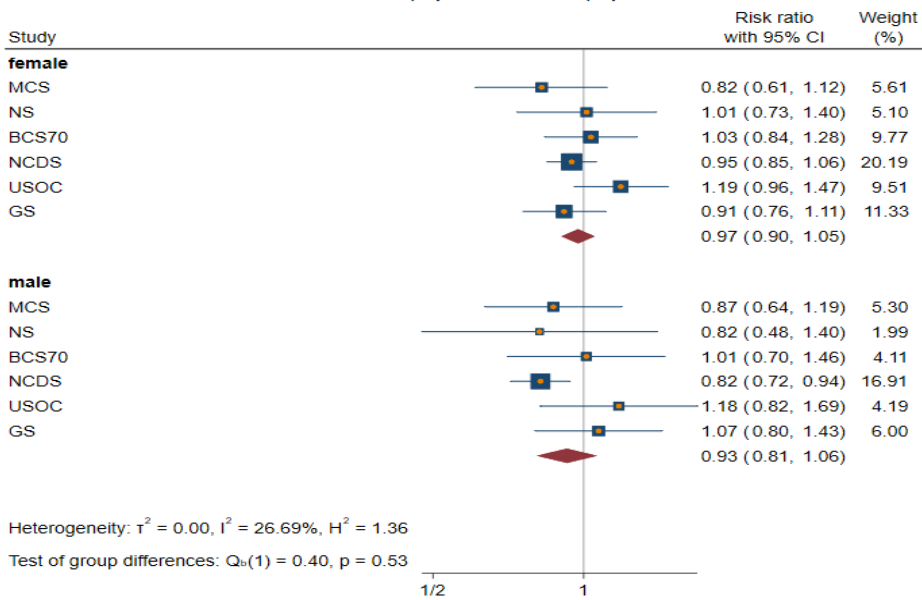

Random-effects REML model

Figure set 27: Less time/fewer days of physical exercise

Commented [MJ7]:

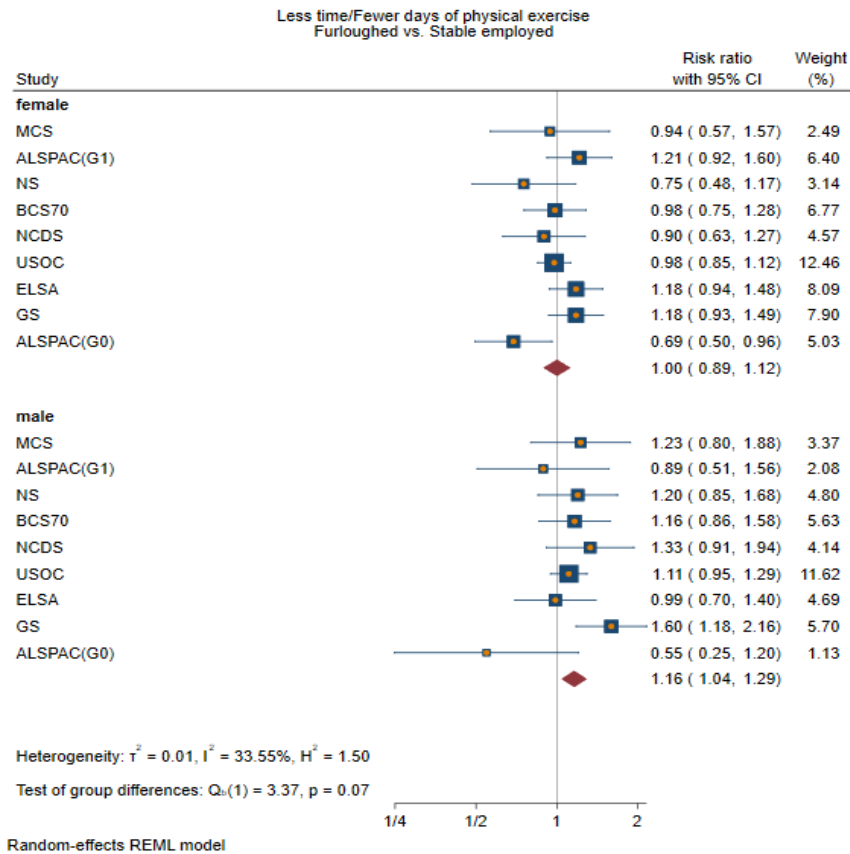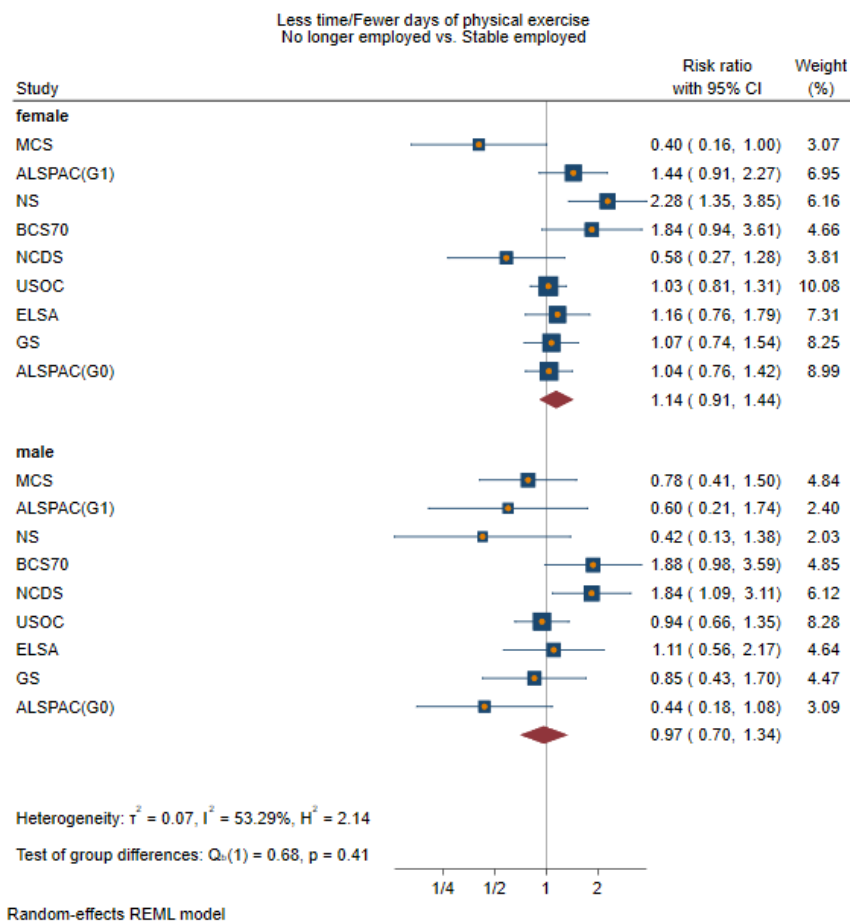

Less time/Fewer days of physical exercise  
Stable unemployed vs. Stable employed

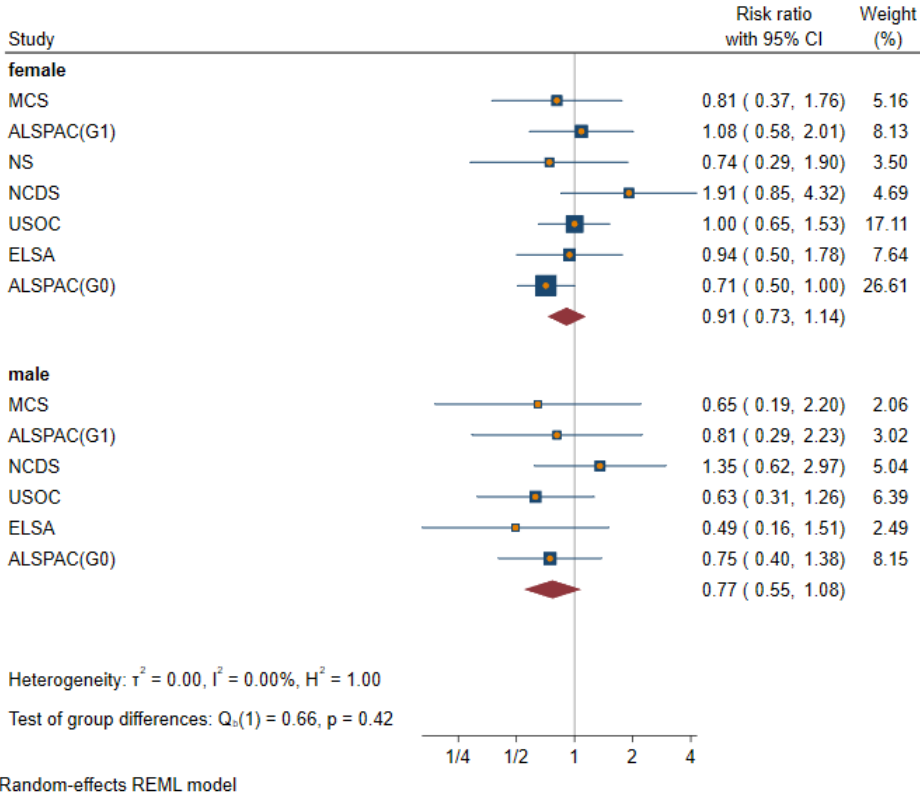

Random-effects REML model

Less time/Fewer days of physical exercise  
Became employed vs. Stable employed

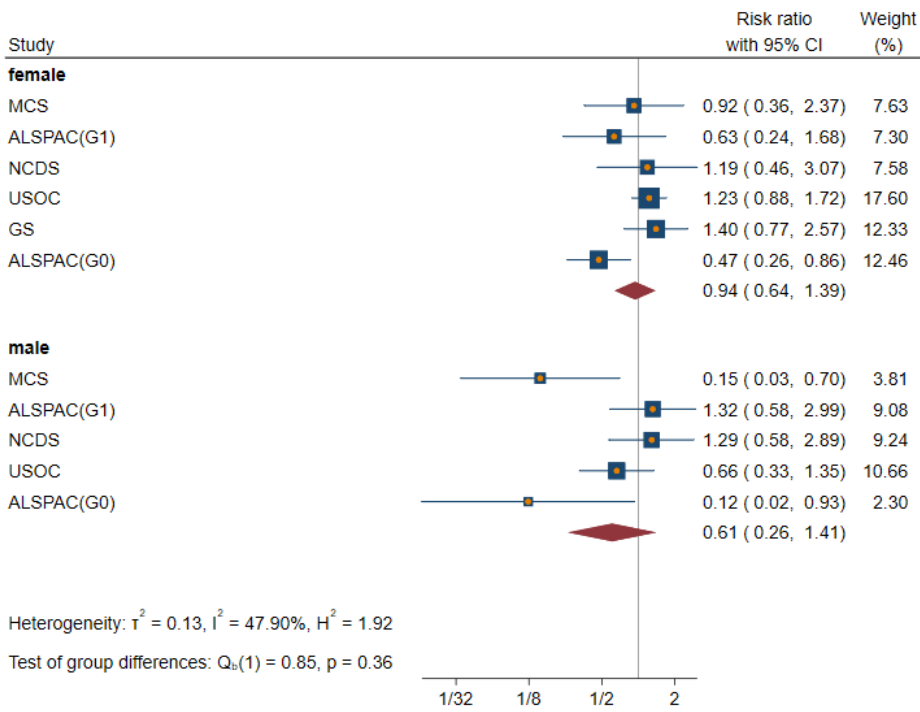

Random-effects REML model



Less time/Fewer days of physical exercise  
Stable non-employed vs. Stable employed

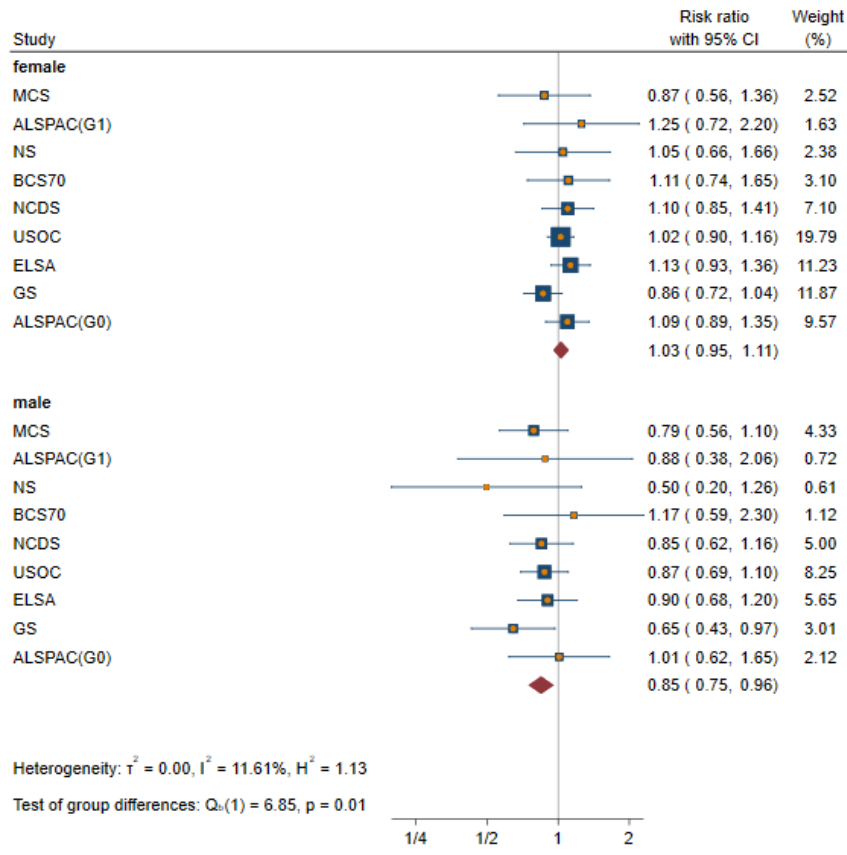

Figure set 28: More time/ days of physical exercise

Commented [MJ8]:

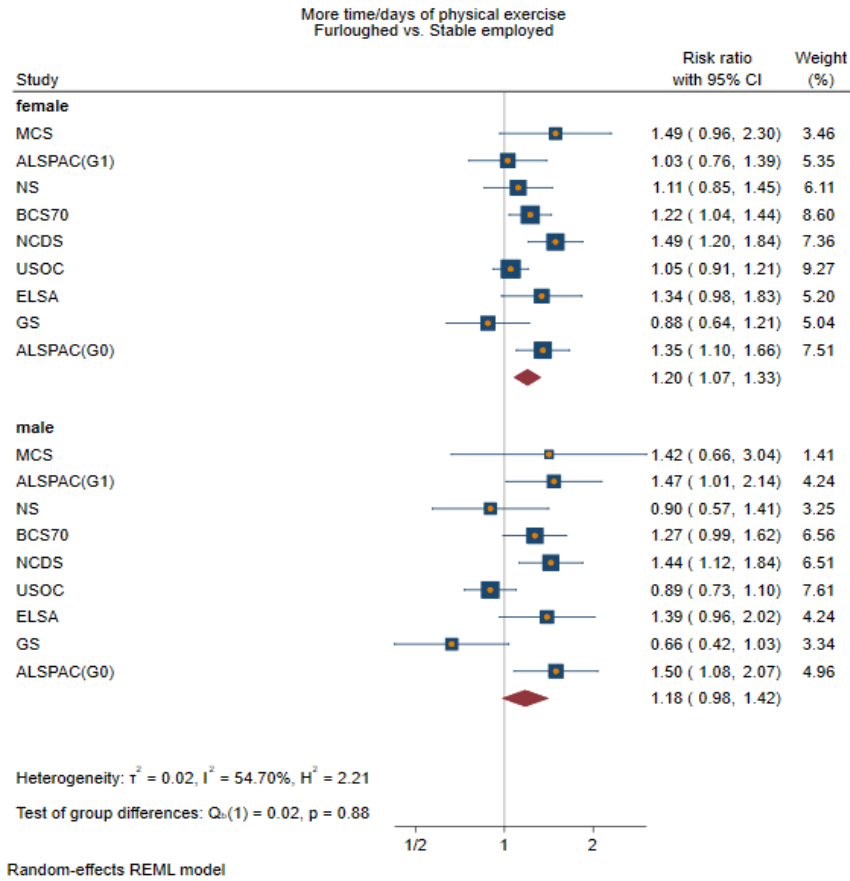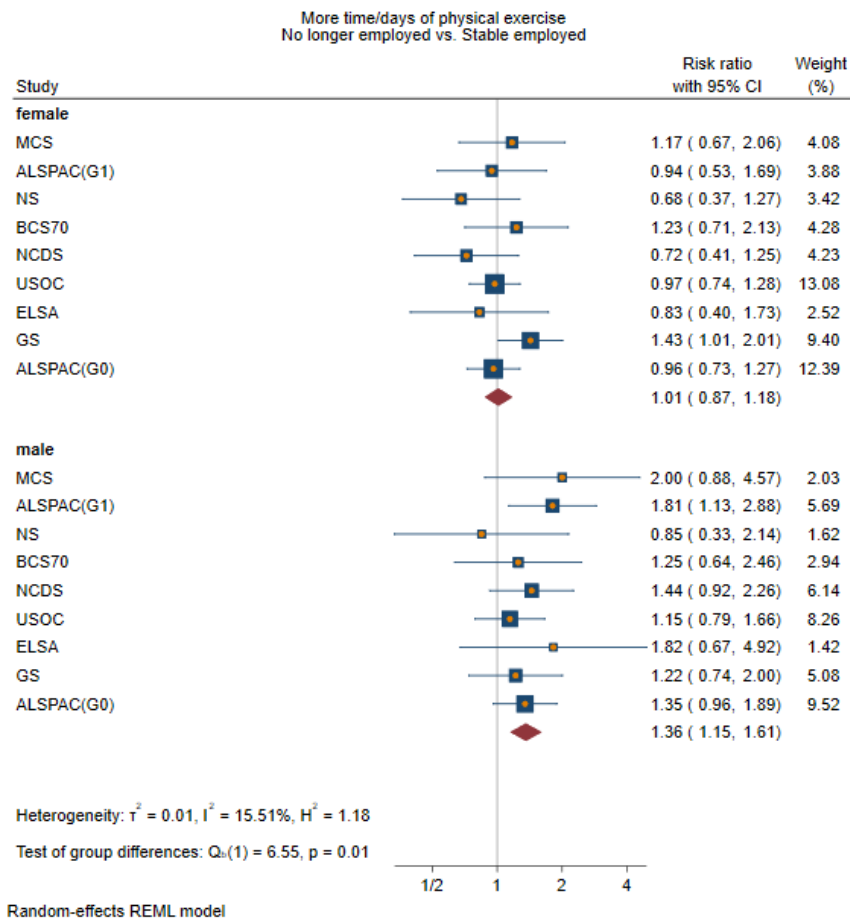

More time/days of physical exercise  
Stable unemployed vs. Stable employed

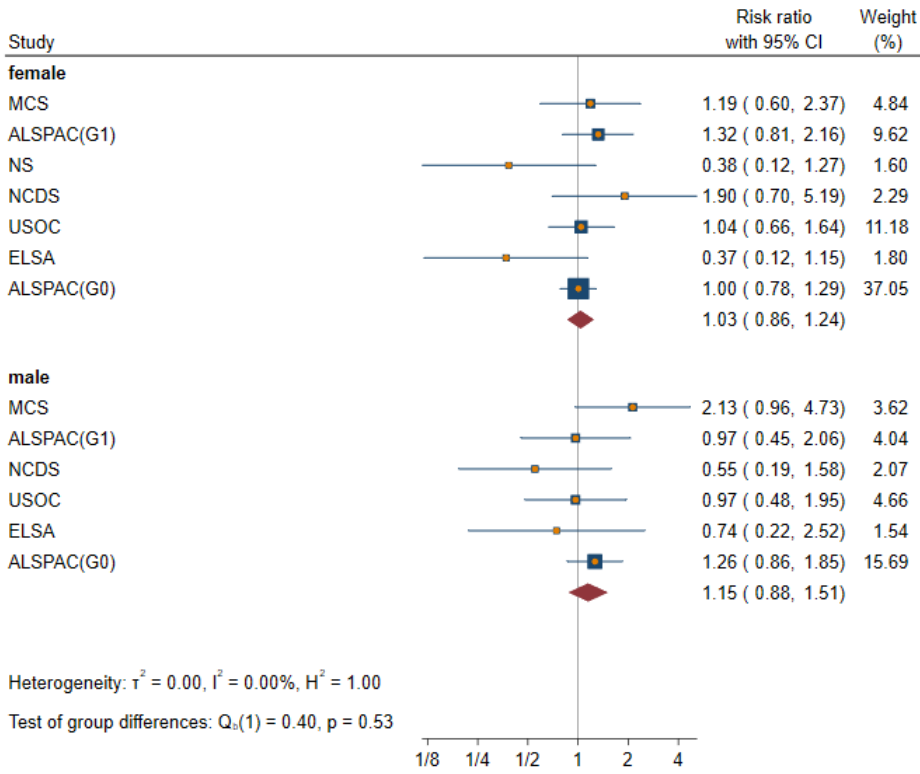

Random-effects REML model

More time/days of physical exercise  
Became employed vs. Stable employed

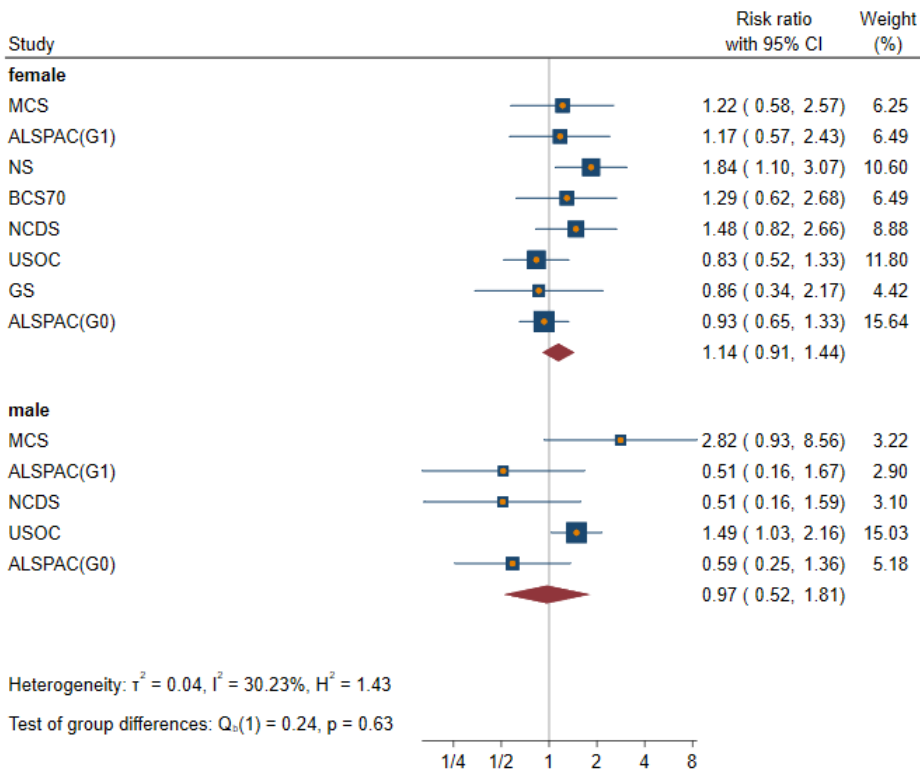

Random-effects REML model

More time/days of physical exercise  
Stable non-employed vs. Stable employed

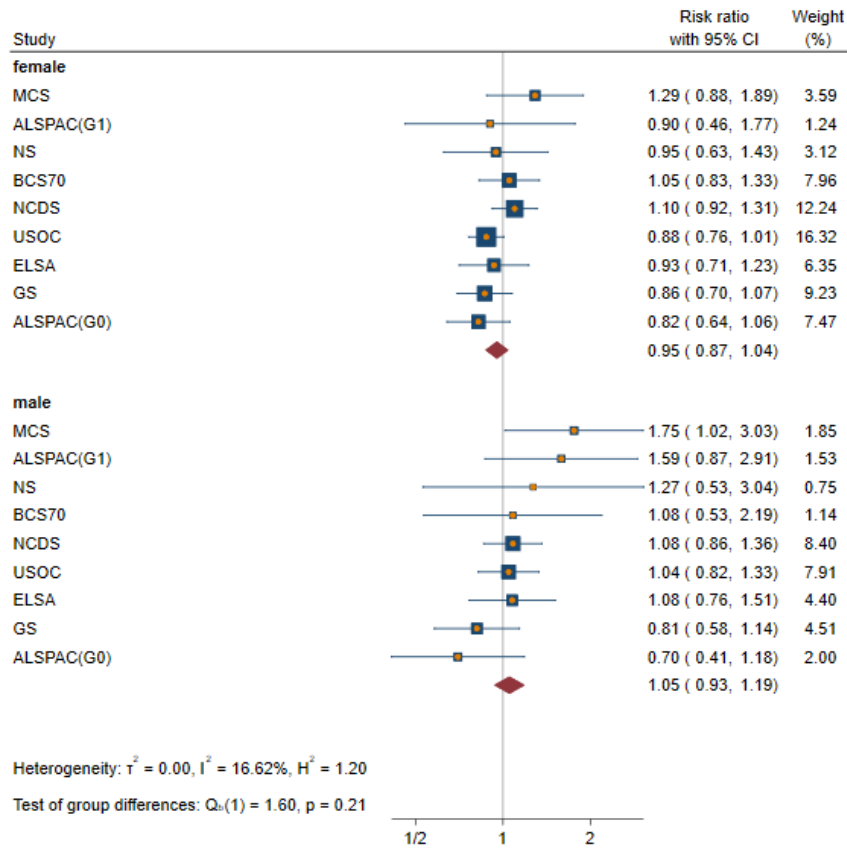

**Figure set 29: Sleeps outside 'normal range' (i.e. <6 or 9+ hours)**

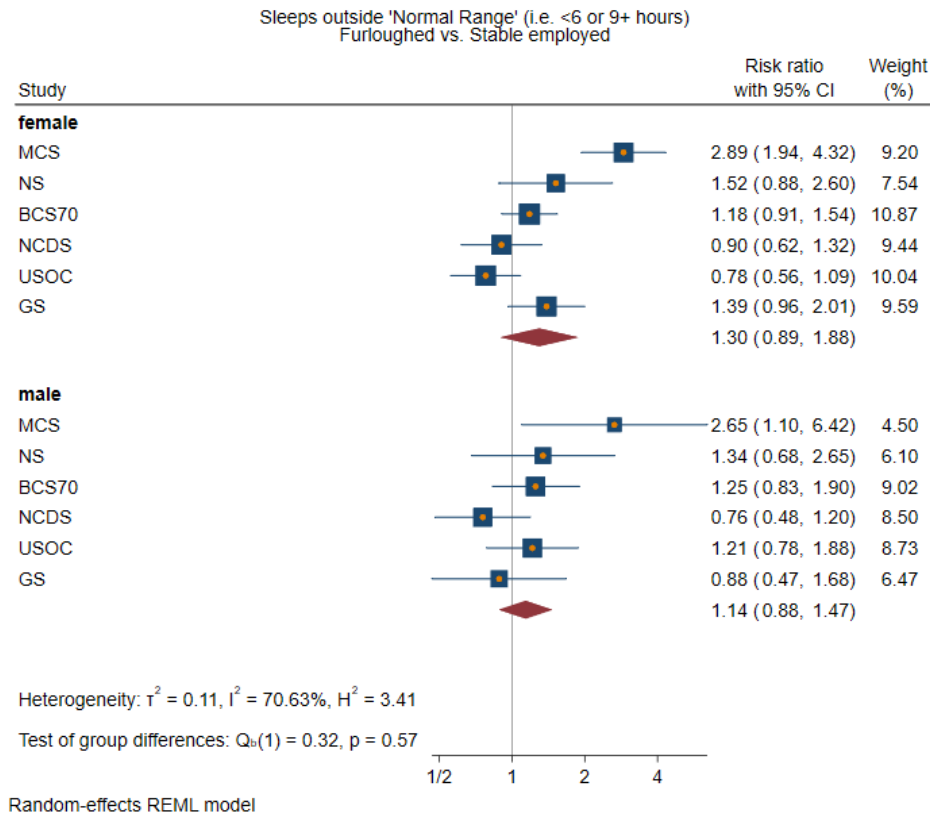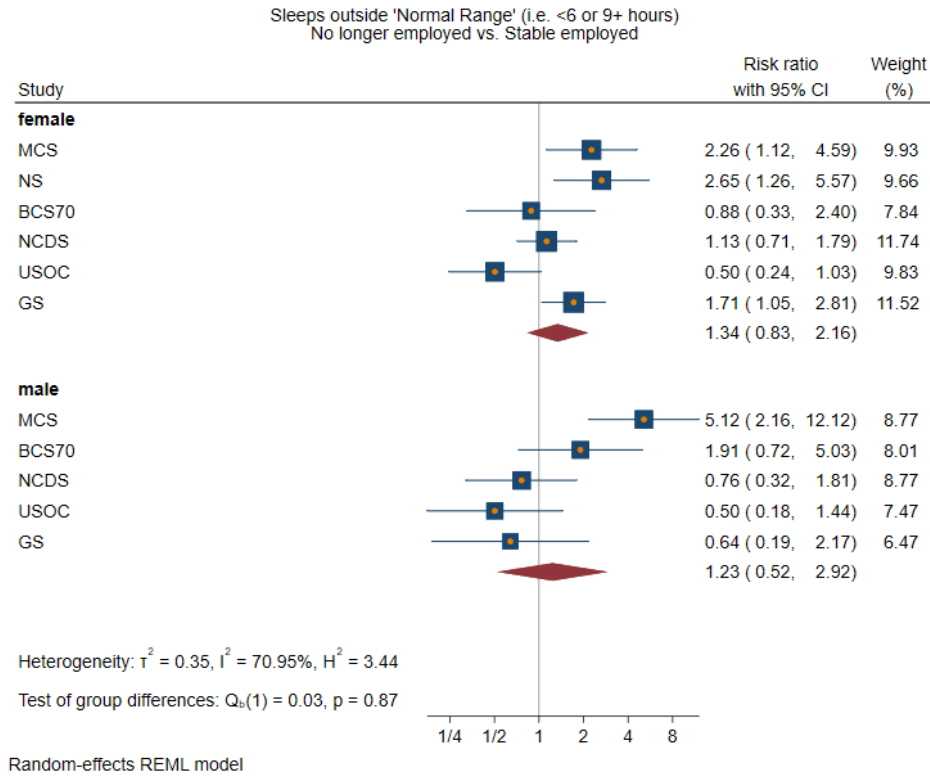

Sleeps outside 'Normal Range' (i.e. <6 or 9+ hours)  
Stable unemployed vs. Stable employed

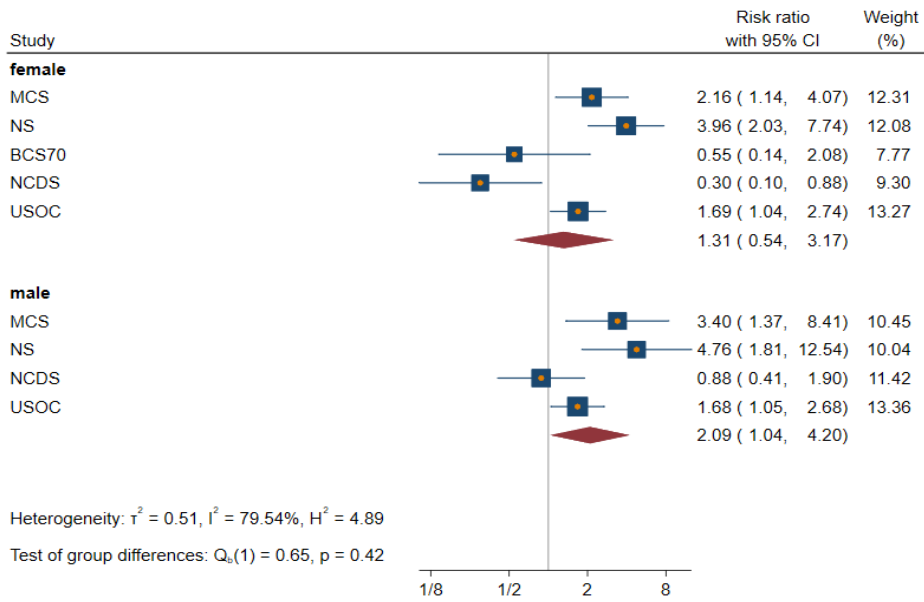

Random-effects REML model

Sleeps outside 'Normal Range' (i.e. <6 or 9+ hours)  
Became employed vs. Stable employed

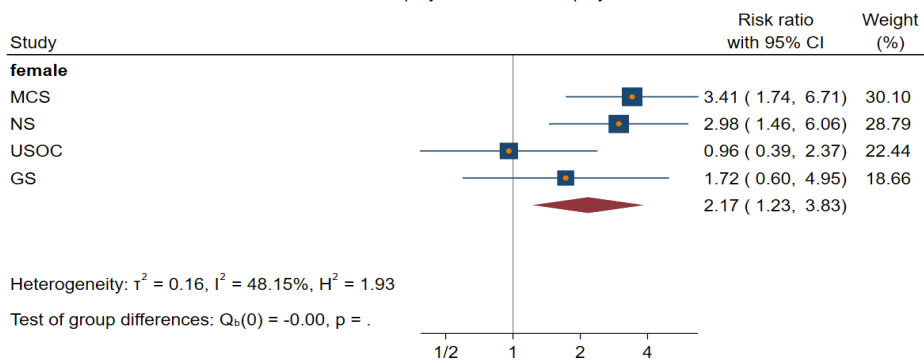

Random-effects REML model

Sleeps outside 'Normal Range' (i.e. <6 or 9+ hours)  
Stable non-employed vs. Stable employed

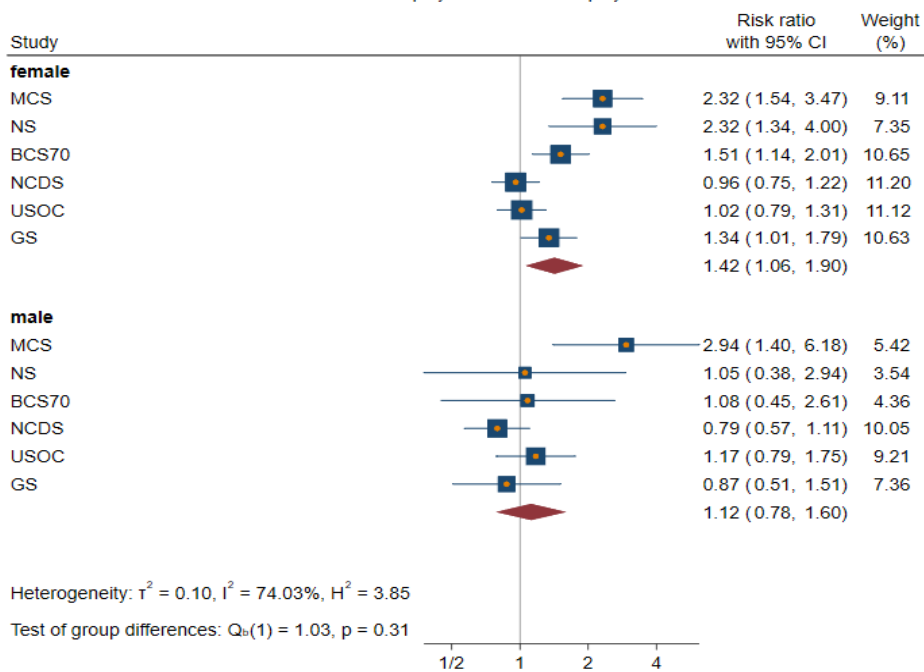

Random-effects REML model

Figure set 30: Sleeps less than before

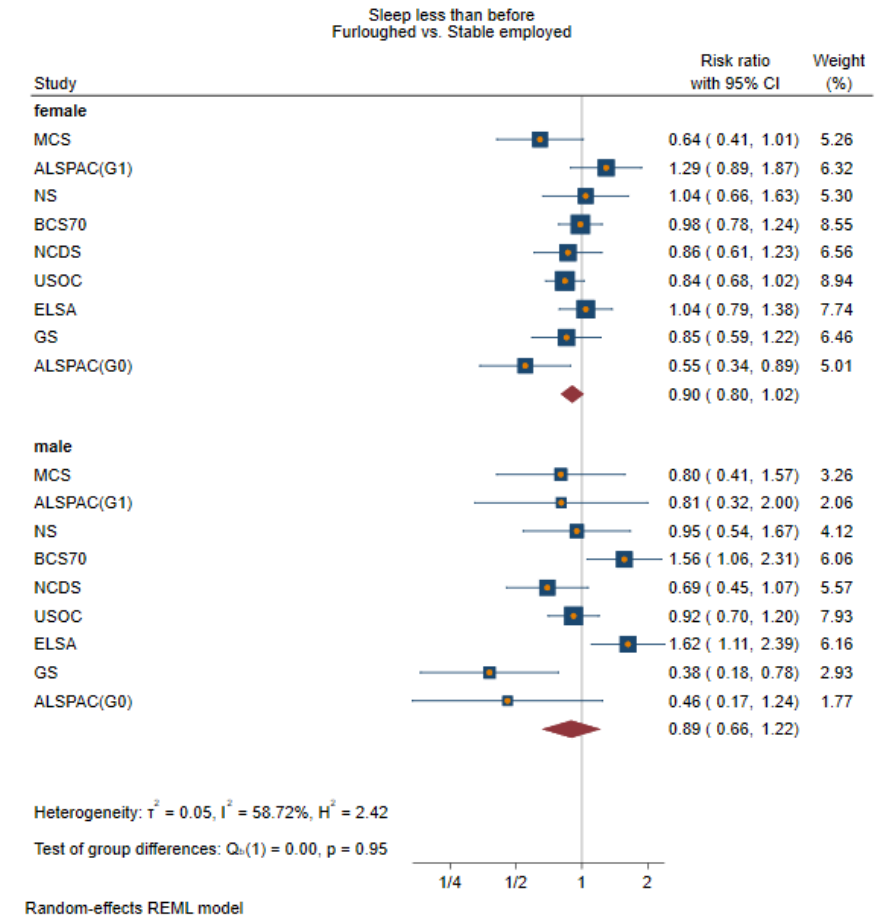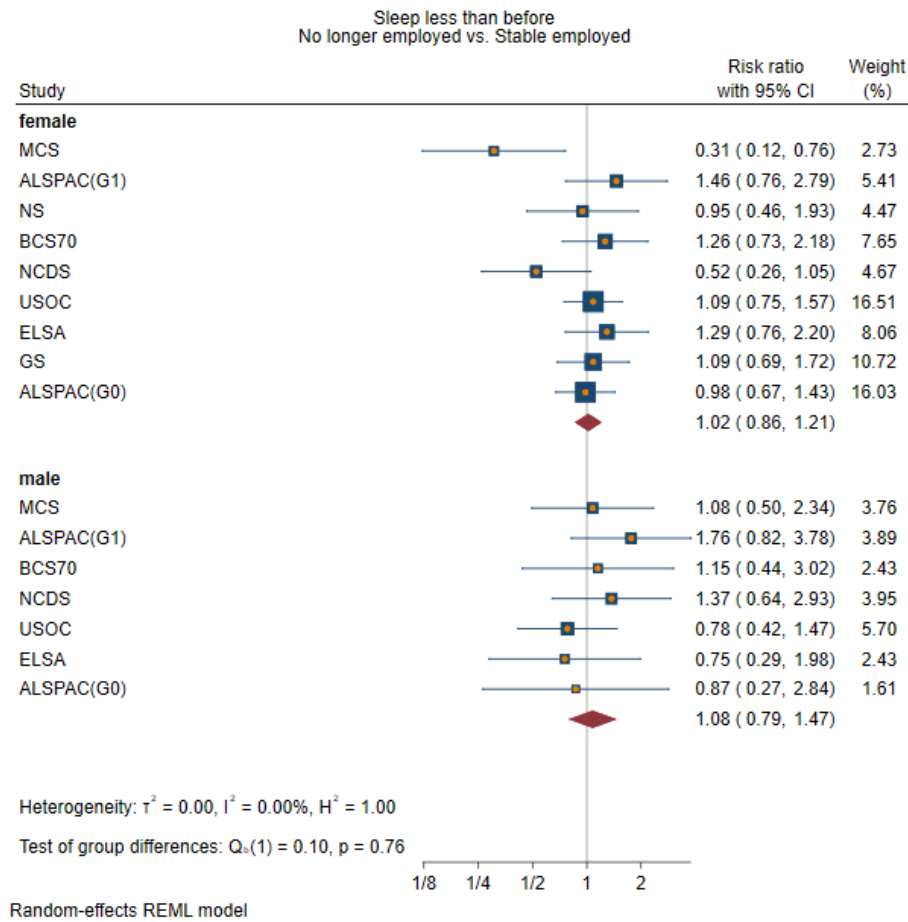

Sleep less than before  
Stable unemployed vs. Stable employed

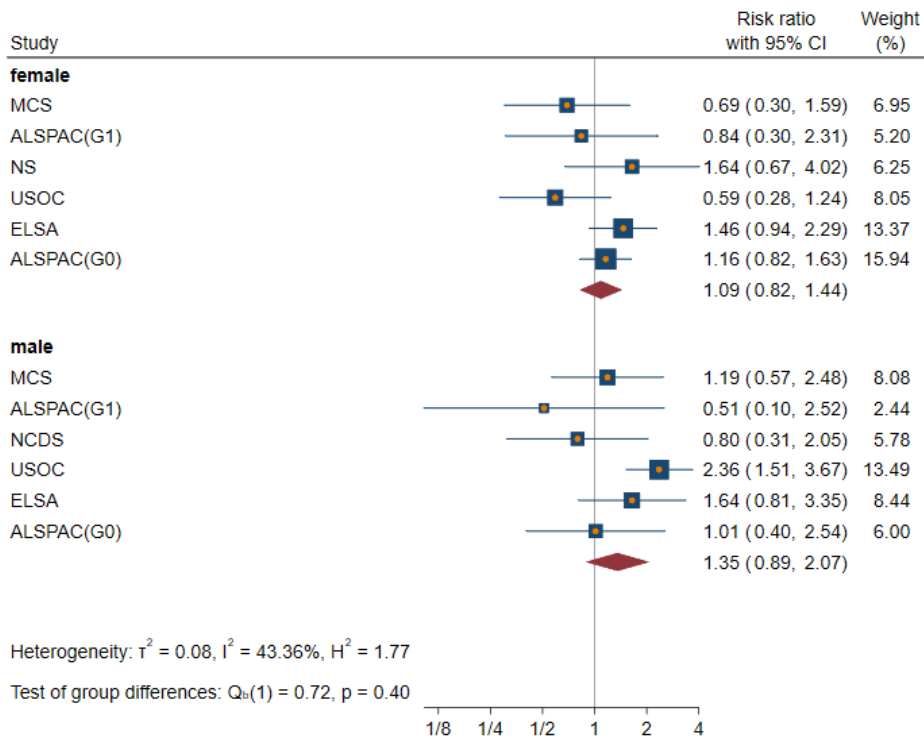

Random-effects REML model

Sleep less than before  
Became employed vs. Stable employed

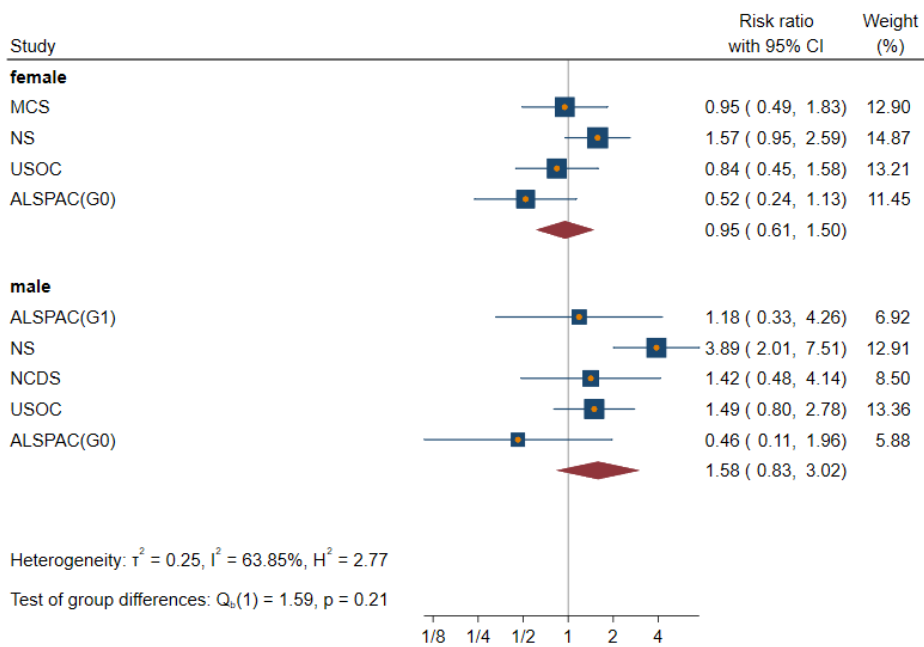

Random-effects REML model



Sleep less than before  
Stable non-employed vs. Stable employed

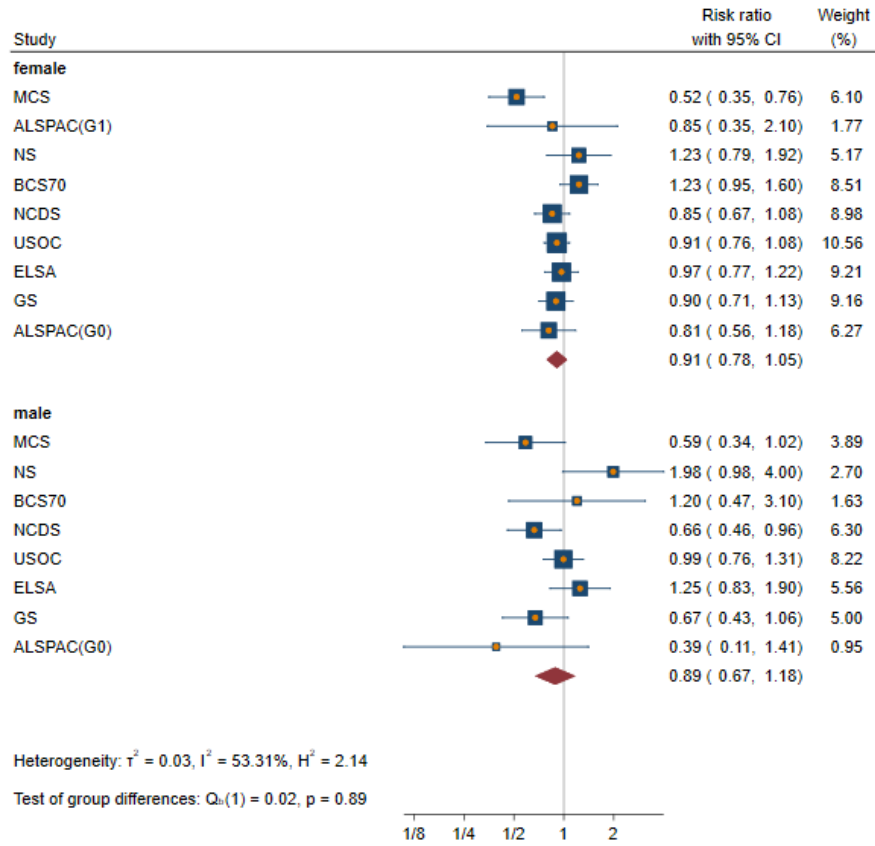

Figure set 31: Sleeps more than before

Commented [MJ9]:

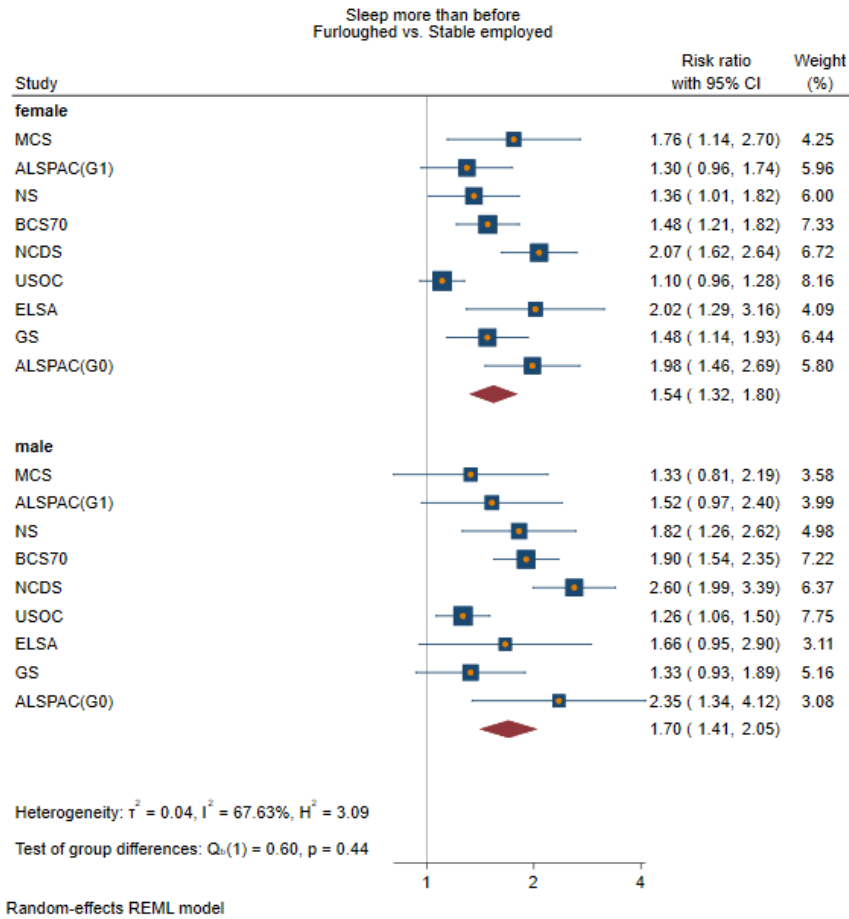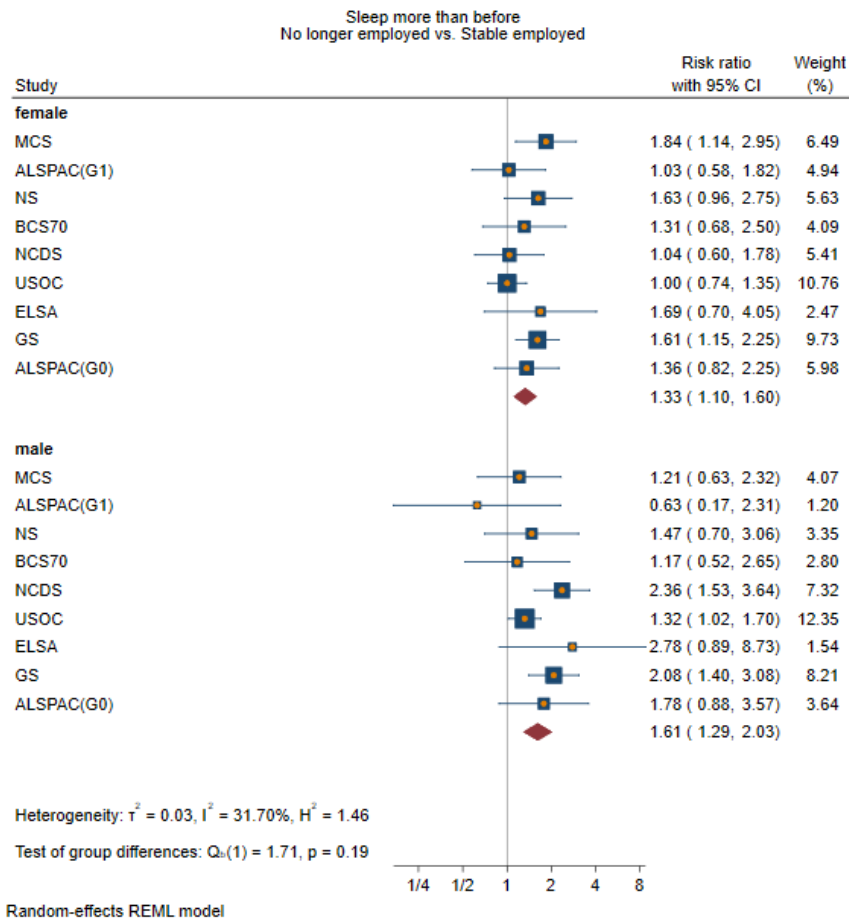

Sleep more than before  
Stable unemployed vs. Stable employed

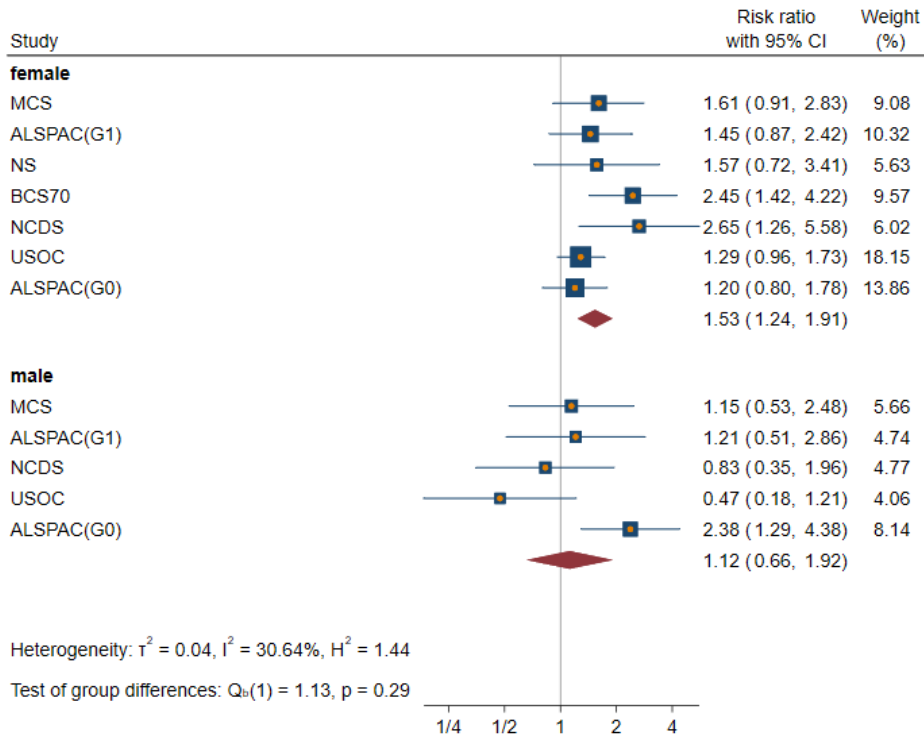

Random-effects REML model

Sleep more than before  
Became employed vs. Stable employed

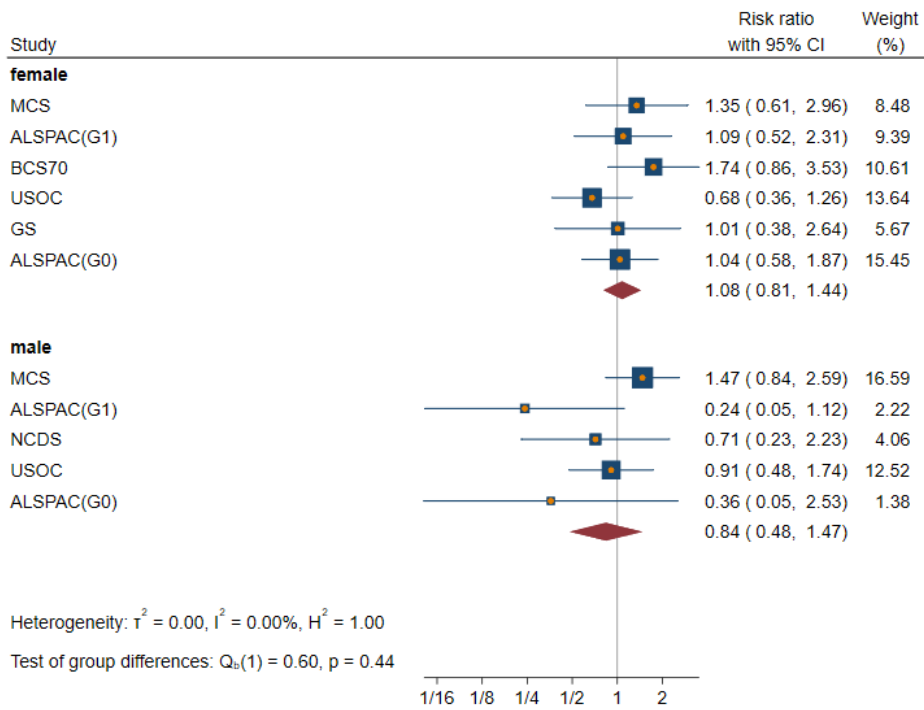

Random-effects REML model

Sleep more than before  
Stable non-employed vs. Stable employed

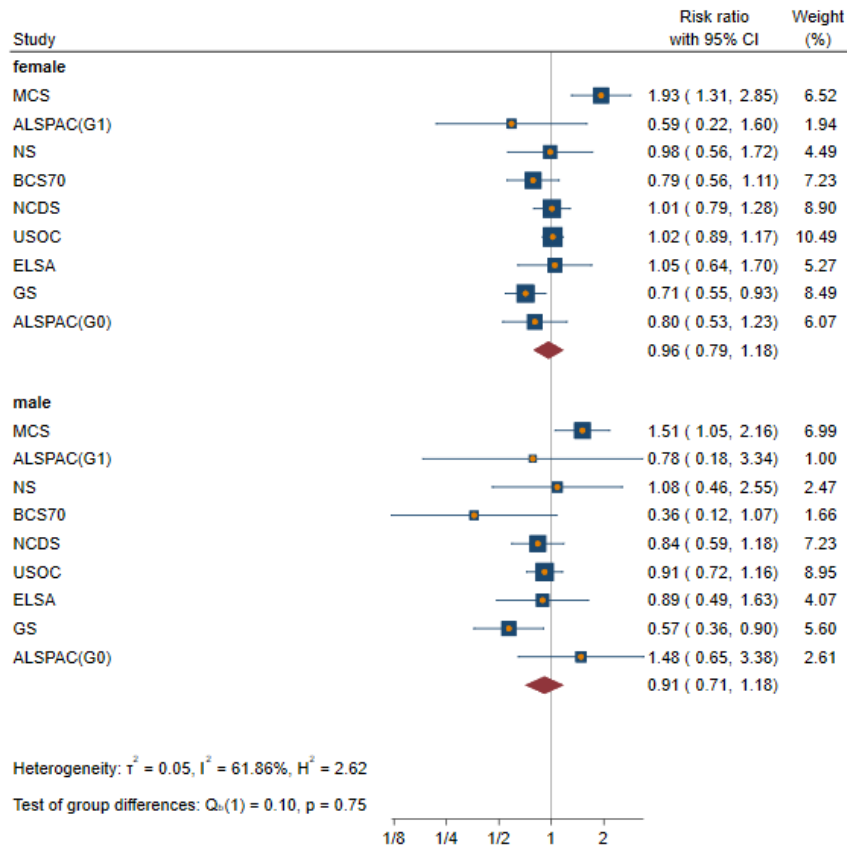

**Figure set 32: From 6/9h a night to outside 'normal range'**

From 6/9h a night to outside 'normal range'  
Furloughed vs. Stable employed

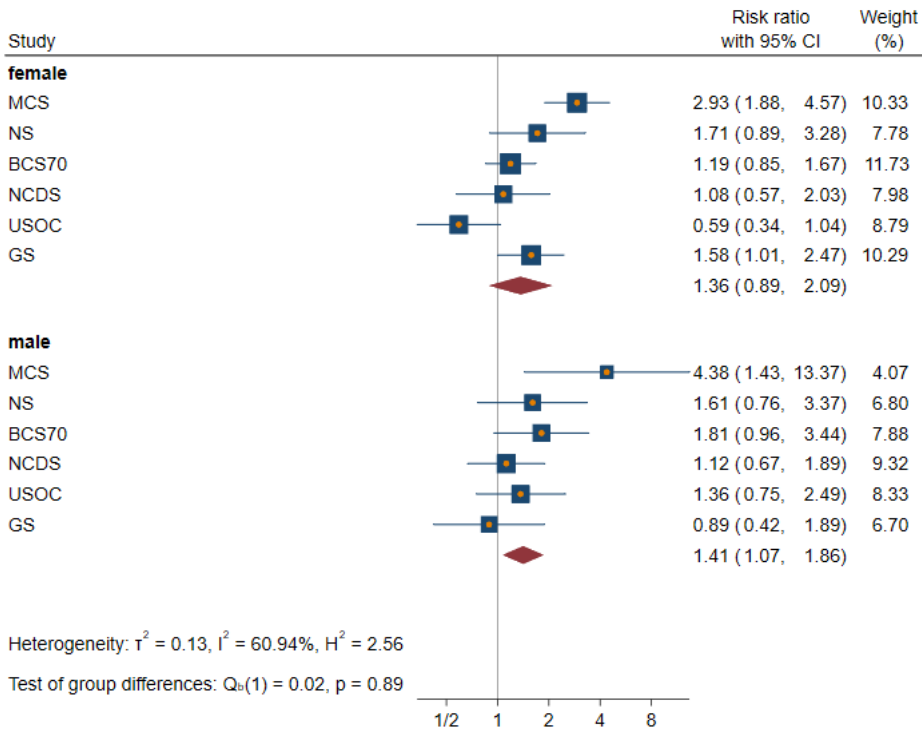

Random-effects REML model

From 6/9h a night to outside 'normal range'  
No longer employed vs. Stable employed

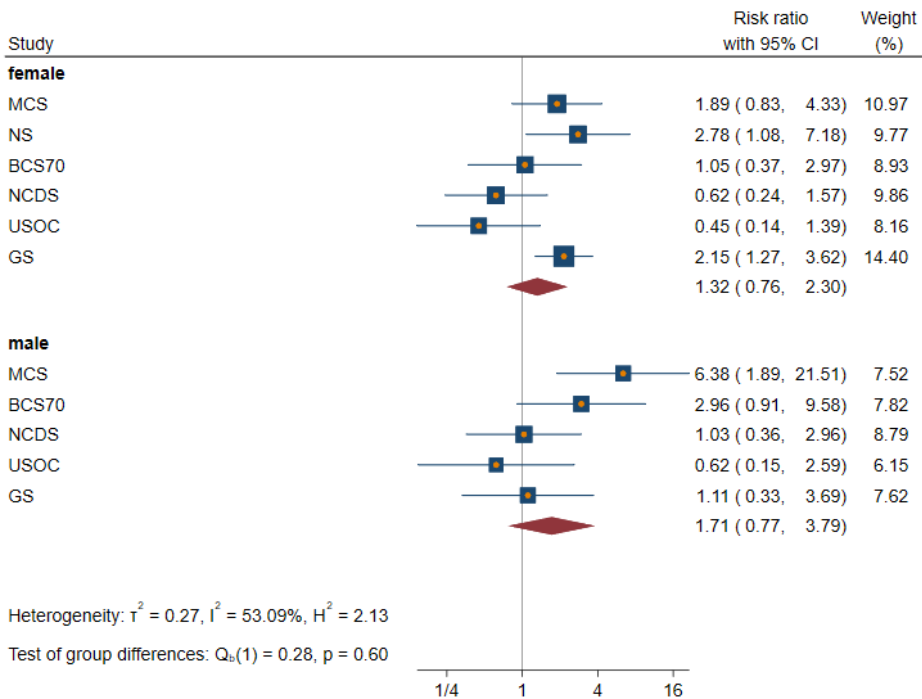

Random-effects REML model

From 6/9h a night to outside 'normal range  
Stable unemployed vs. Stable employed

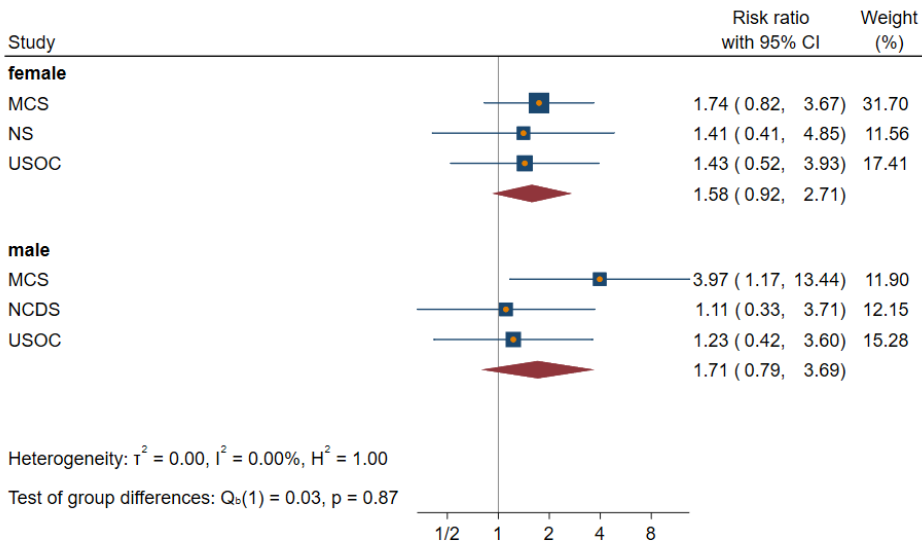

Random-effects REML model

From 6/9h a night to outside 'normal range  
Became employed vs. Stable employed

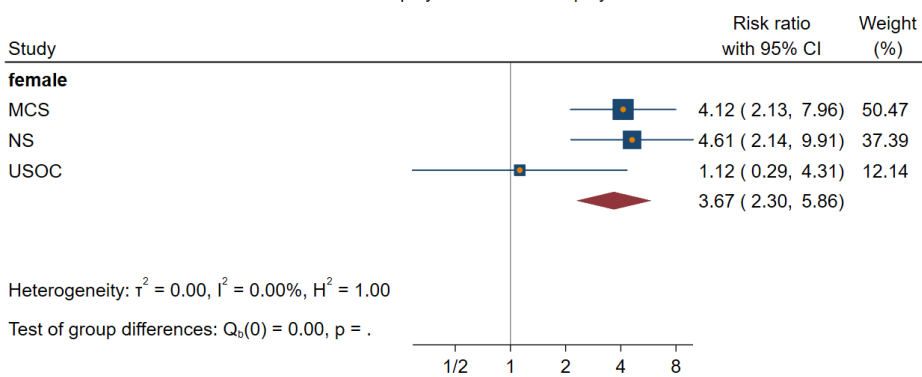

Random-effects REML model

From 6/9h a night to outside 'normal range  
Stable non-employed vs. Stable employed

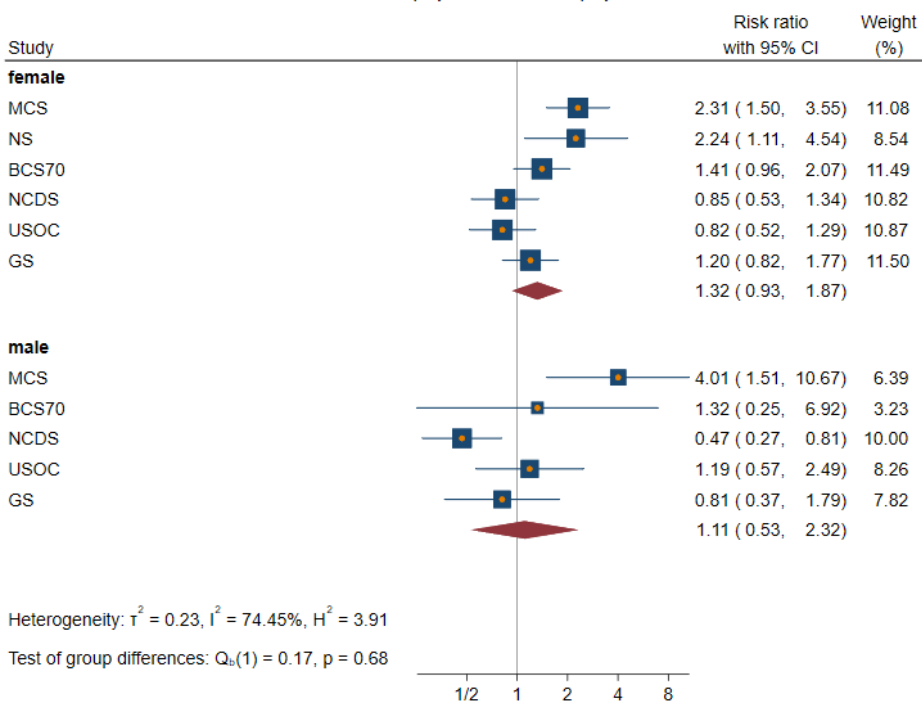

Random-effects REML model

**Figure set 33: From outside 'normal range' to 6/9h a night**

From outside 'normal range' to 6/9h a night  
Furloughed vs. Stable employed

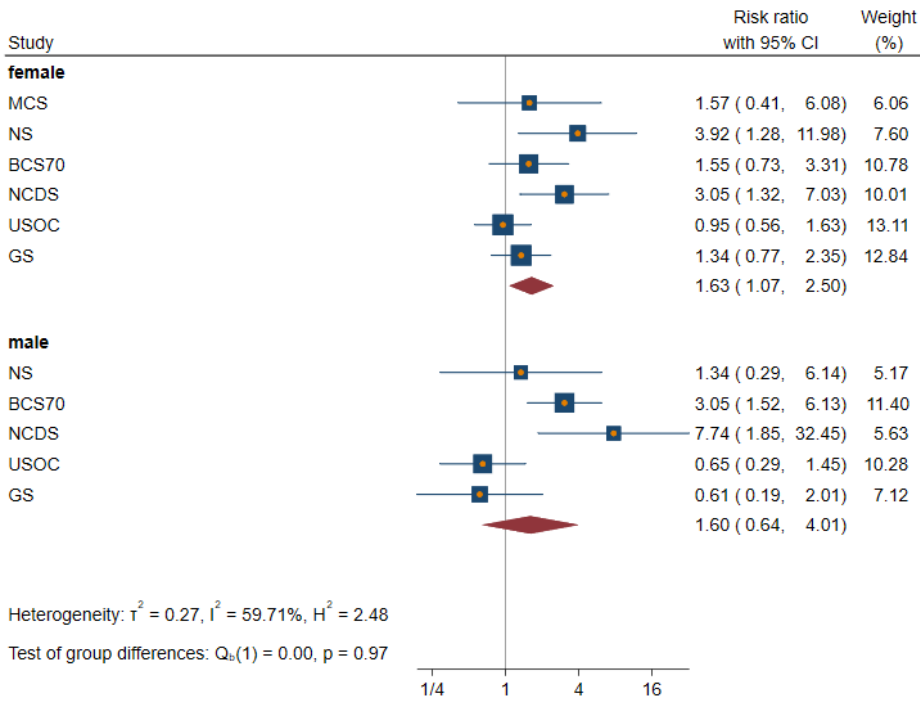

Random-effects REML model

From outside 'normal range' to 6/9h a night  
No longer employed vs. Stable employed

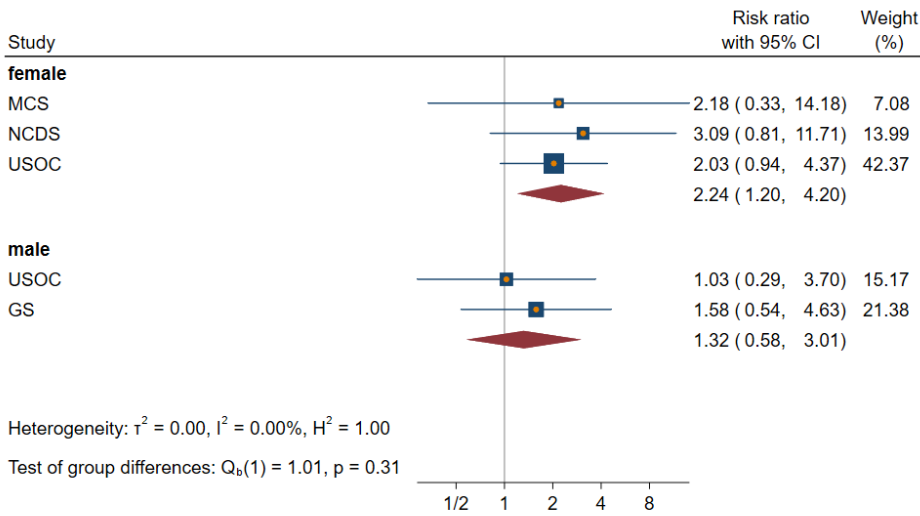

Random-effects REML model

From outside 'normal range' to 6/9h a night  
Stable unemployed vs. Stable employed

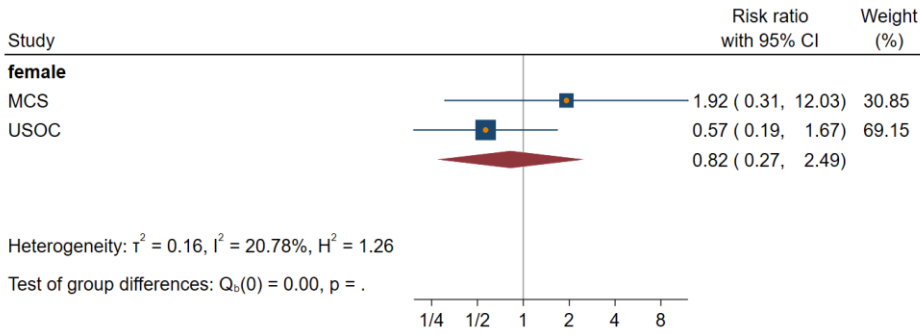

Random-effects REML model

From outside 'normal range' to 6/9h a night  
Became employed vs. Stable employed

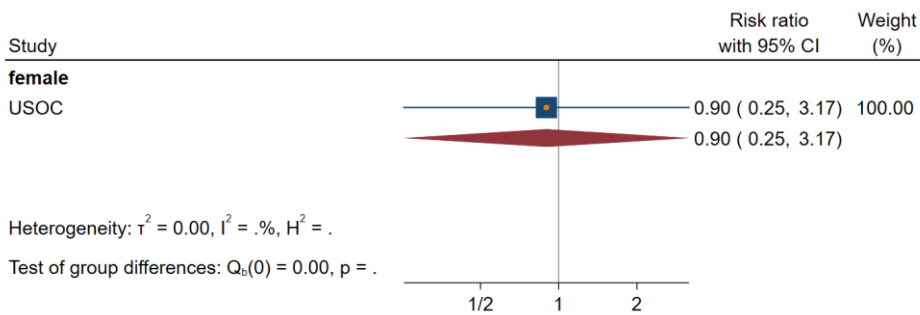

Random-effects REML model

From outside 'normal range' to 6/9h a night  
Stable non-employed vs. Stable employed

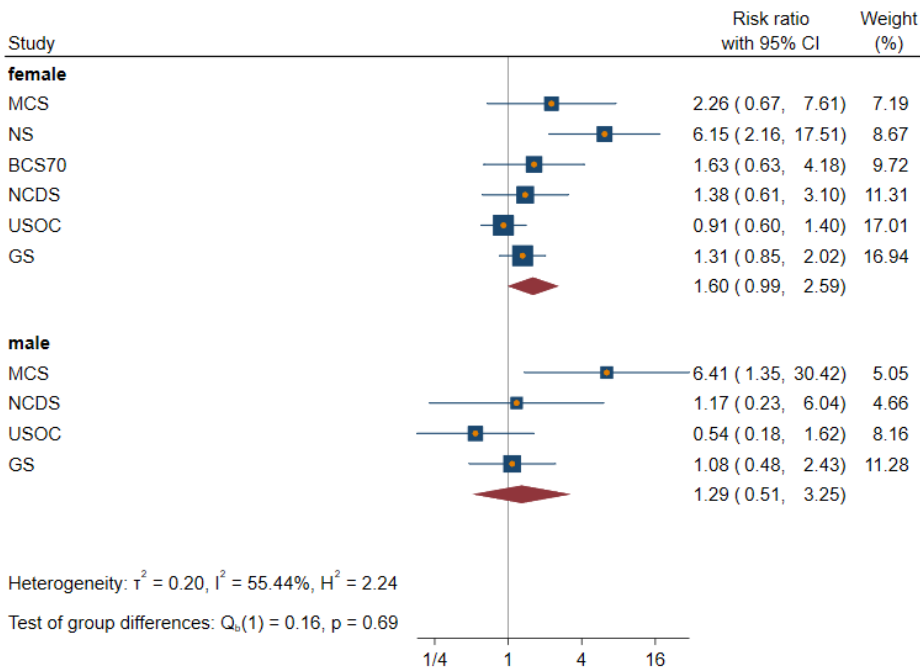

Random-effects REML model
